# Supplementary material
Source: publisher site journal article supplement (https://www.spandidos-publications.com/1467/downloadSupplementary)
Supplement: Supplementary file 1 [file downloadSupplementary]

## Sheet: HepG2+PA
Accession	Description	Score	Coverage	# Proteins	# Unique Peptides	# Peptides	# PSMs	Area	# AAs	MW [kDa]	calc. pI	Relative abundance (%)
P49327	Fatty acid synthase OS=Homo sapiens OX=9606 GN=FASN PE=1 SV=3 - [FAS_HUMAN]	2669.83	43.49	1	79	79	159	7.40529e+07	2511	273.254	6.44287	0.0178511
	A3	Sequence	# PSMs	# Proteins	# Protein Groups	Protein Group Accessions	Modifications	ΔCn	Area	q-Value	PEP		IonScore	Exp Value	Charge	MH+ [Da]	ΔM [ppm]	RT [min]	# Missed Cleavages
	High	TGGAYGEDLGADYNLSQVcDGK	4	1	1	P49327	C19(Methylthio)	0	2.19113e+07	0	1.111e-10		84.17	1.78014e-08	2	2278.96	-1.03012	51.1665	0
	High	WTSQDSLLGMEFSGR	2	1	1	P49327		0	2.64838e+07	0	3.42e-08		75.48	2.39253e-07	2	1713.79	0.158463	50.669	0
	High	EDGLAQQQTQLNLR	3	1	1	P49327		0	6.89814e+07	0	1.221e-07		73.9	5.52e-07	2	1613.82	-0.2114	30.8564	0
	High	GVDLVLNSLAEEK	2	1	1	P49327		0	3.30056e+07	0	5.521e-08		73.21	6.9003e-07	2	1386.75	0.120399	45.7253	0
	High	LPEDPLLSGLLDSPALK	5	1	1	P49327		0	37701685	0	7.338e-11		71.05	8.0094e-07	2	1777.99	-0.351602	59.5639	0
	High	AINcATSGVVGLVNcLR	3	1	1	P49327	C4(Methylthio); C15(Methylthio)	0	2.22299e+06	0	6.505e-10		70.39	1.25691e-06	2	1781.85	-0.576361	60.7693	0
	High	VGDPQELNGITR	2	1	1	P49327		0	6.39297e+07	0	1.418e-06		67.31	2.1179e-06	2	1298.67	-0.377392	27.5868	0
	High	AALQEELQLcK	2	1	1	P49327	C10(Methylthio)	0	2.57339e+07	0	1.339e-06		67.25	2.54293e-06	2	1291.64	0.0504038	47.293	0
	High	FDASFFGVHPK	2	1	1	P49327		0	1.52351e+07	0	1.877e-06		66.14	2.91864e-06	2	1251.62	1.09596	41.8427	0
	High	DNLEFFLAGIGR	2	1	1	P49327		0	1.27848e+07	0	1.246e-06		65.47	3.29199e-06	2	1351.7	-1.04093	58.2739	0
	High	TLLEGSGLESIISIIHSSLAEPR	3	1	1	P49327		0	1.17564e+06	0	3.936e-10		64.13	4.07617e-06	3	2422.32	-0.911011	65.7314	0
	High	AcLDTAVENMPSLK	2	1	1	P49327	C2(Methylthio)	0	5.6949e+07	0	1.3e-07		64.01	3.01866e-06	2	1537.71	1.82449	45.538	0
	High	AFDTAGNGYcR	2	1	1	P49327	C10(Methylthio)	0	8.8153e+06	0	3.095e-07		60.1	1.6613e-06	2	1220.48	0.0960061	32.4656	0
	High	LQVVDQPLPVR	2	1	1	P49327		0	6.0226e+07	0	2.103e-05		59.97	6.99818e-06	2	1263.74	-0.692257	35.5501	0
	High	TGTVSLEVR	2	1	1	P49327		0	1.66971e+07	0	4.274e-05		57.51	2.14677e-05	2	961.531	-0.0350496	25.4441	0
	High	SEGVVAVLLTK	2	1	1	P49327		0	2.51559e+07	0	3.643e-06		57.31	1.56984e-05	2	1115.67	-0.0640995	45.2583	0
	High	GLVQALQTK	2	1	1	P49327		0	1.89923e+07	0	0.000335		53.71	4.10702e-05	2	957.569	-4.46157	29.6043	0
	High	DPETLVGYSMVGcQR	2	1	1	P49327	C13(Methylthio)	0	1.20852e+07	0	6.675e-07		52.87	2.53044e-05	2	1700.74	-0.122427	48.4673	0
	High	DTVTISGPQAPVFEFVEQLR	5	1	1	P49327		0	2.00061e+07	0	2.168e-07		52.77	9.32706e-05	2	2233.15	-1.23902	61.44	0
	High	VLFPATGYLSIVWK	2	1	1	P49327		0	1.92321e+06	0	6.266e-07		52.48	5.16917e-05	2	1593.9	-0.467694	61.2939	0
	High	ADEASELAcPTPK	2	1	1	P49327	C9(Methylthio)	0	3.24155e+07	0	1.242e-07		52.22	3.02894e-05	2	1377.6	-0.152279	33.0157	0
	High	VYATILNAGTNTDGFK	2	1	1	P49327		0	6.50555e+07	0	1.17e-06		49.35	0.000158538	2	1684.85	-1.06762	41.2772	0
	High	VLEALLPLK	2	1	1	P49327		0	1.92463e+07	0	0.0002841		48.63	1.36763e-05	2	995.652	2.27788	47.1623	0
	High	VAAAVDLIIK	2	1	1	P49327		0	1.09802e+07	0	3.774e-06		48.09	4.73478e-05	2	1012.64	0.0731283	41.4589	0
	High	EVWALVQAGIR	2	1	1	P49327		0	8.10406e+06	0	7.394e-06		47.9	0.000147585	2	1241.7	1.15518	49.8336	0
	High	AQVADVVVSR	2	1	1	P49327		0	2.79622e+07	0	1.461e-05		47.65	0.000212162	2	1043.59	1.36235	24.1702	0
	High	mEEVVIAGMSGK	2	1	1	P49327	N-Term(Acetyl)	0	3.46856e+07	0	3.706e-06		45.74	0.000313356	2	1292.62	-0.826801	54.6636	0
	High	VLQGDLVMNVYR	2	1	1	P49327		0	3.00527e+07	0	9.528e-06		45.31	0.000449024	2	1406.74	-0.84639	42.9545	0
	High	DGAWGAFR	2	1	1	P49327		0	5.11017e+06	0	5.553e-05		44.54	0.000268944	2	879.41	-0.8523	35.9774	0
	High	VFTTVGSAEK	2	1	1	P49327		0	2.33308e+07	0	0.0002099		43.12	0.00054847	2	1038.55	0.966466	21.9559	0
	High	QGVQVQVSTSNISSLEGAR	2	1	1	P49327		0	2.70494e+07	0	9.794e-07		42.85	0.00130738	2	1960.01	-0.271717	38.3943	0
	High	FPQLDSTSFANSR	2	1	1	P49327		0	57530836	0	3.557e-07		42.52	0.000523373	2	1469.7	-0.275985	39.2543	0
	High	LPESENLQEFWDNLIGGVDMVTDDDRR	1	1	1	P49327		0	1.44096e+06	0	1.469e-08		42.04	0.000762711	3	3163.46	0.305225	65.3509	1
	High	GMGLSLMR	2	1	1	P49327		0	8.81535e+06	0	0.001411		41.43	0.000751824	2	864.442	-0.74139	37.2294	0
	High	SFYGSTLFLcR	2	1	1	P49327	C10(Methylthio)	0	3.73589e+06	0	2.107e-06		40.94	0.000680545	2	1339.62	-0.5655	57.5436	0
	High	AAPLDSIHSLAAYYIDcIR	2	1	1	P49327	C17(Methylthio)	0	2.1745e+06	0	7.524e-08		40.87	0.00113767	3	2138.04	0.0315604	64.4382	0
	High	DPSQQELPR	2	1	1	P49327		0	4.48935e+07	0	0.0001159		40.35	0.000848766	2	1069.53	-0.495829	20.3052	0
	High	VVVQVLAEEPEAVLK	3	1	1	P49327		0	6.82418e+07	0	4.479e-08		40.24	0.000610323	2	1622.93	-1.65002	48.0715	0
	High	SLLVNPEGPTLMR	2	1	1	P49327		0	5.67747e+07	0	0.0001087		38.94	0.00131473	2	1426.77	-0.6528	43.304	0
	High	HGLYLPTR	2	1	1	P49327		0	3.09595e+07	0	0.0005304		37.59	0.00127152	2	956.532	0.495064	26.0685	0
	High	DNWVSFMDTMLQMSILGSAK	1	1	1	P49327		0	444244	0	9.815e-07		37.07	0.00225786	2	2274.06	-0.581194	66.6799	0
	High	cTVFHGAQVEDAFR	2	1	1	P49327	C1(Methylthio)	0	1.24956e+07	0	5.897e-06		35.15	0.00164966	3	1625.72	0.689656	40.8618	0
	High	YSGTLNLDR	2	1	1	P49327		0	3.12325e+07	0	0.001264		34.6	0.00364074	2	1038.52	-1.24417	26.8511	0
	High	LSFFFDFR	2	1	1	P49327		0	1.38795e+06	0	0.0001373		32.07	0.00887843	2	1078.54	0.340314	59.4651	0
	High	LSPDAIPGK	2	1	1	P49327		0	2.70132e+07	0	0.0009183		31.5	0.00198225	2	897.504	0.220305	22.775	0
	High	ELNLVLSVR	2	1	1	P49327		0	4.17698e+06	0	7.901e-05		30.6	0.00653223	2	1042.63	-0.0339719	44.0352	0
	High	VYQWDDPDPR	2	1	1	P49327		0	1.91524e+07	0	0.002149		29.88	0.00462607	2	1290.57	-0.467142	32.9153	0
	High	LGMLSPEGTcK	2	1	1	P49327	C10(Methylthio)	0	2.81837e+07	0	0.001076		29.38	0.00813185	2	1181.53	-2.4438	36.7211	0
	High	GILADEDSSRPVWLK	3	1	1	P49327		0	1.85606e+07	0	3.857e-05		27.61	0.0267006	2	1685.89	-0.296458	42.7809	0
	High	GNAGQSNYGFANSAMER	2	1	1	P49327		0	3.55566e+07	0	1.113e-06		27.48	0.00902176	2	1773.76	-0.600987	30.682	0
	High	EGGFLLLHTLLR	1	1	1	P49327		0	2.66992e+06	0	0.0004718		26.39	0.0146954	2	1368.8	-0.184946	56.8227	0
	High	AFEVSENGNLVVSGK	2	1	1	P49327		0	8.77834e+06	0	0.0001974		26.28	0.0350902	2	1549.79	-0.268025	36.4312	0
	High	LHLSGIDANPNALFPPVEFPAPR	2	1	1	P49327		0	2.24451e+07	0	2.13e-06		24.36	0.0566146	2	2472.3	0.388163	55.9662	0
	High	DGLLENQTPEFFQDVcKPK	3	1	1	P49327	C16(Methylthio)	0	2.92934e+07	0	1.286e-05		24.14	0.0474138	2	2254.05	0.0342724	55.8777	0
	High	HSQDLAFLSMLNDIAAVPATAMPFR	3	1	1	P49327		0	2.49845e+06	0	1.379e-05		21.95	0.111696	2	2716.36	-0.363607	65.1461	0
	High	QQEQQVPILEK	2	1	1	P49327		0	2.87928e+07	0	0.001551		21.85	0.0809882	2	1339.72	-0.953025	28.6412	0
	High	EAcPELDYFVVFSSVScGR	1	1	1	P49327	C3(Methylthio); C17(Methylthio)	0	342229	0	5.915e-05		21.5	0.0297337	2	2199.92	0.133386	64.7376	0
	High	RPTPQDSPIFLPVDDTSFR	3	1	1	P49327		0	4.96123e+07	0	2.55e-05		20.84	0.138455	2	2188.1	-0.600027	48.9199	0
	High	VSVHVIEGDHR	2	1	1	P49327		0	1.33721e+07	0	0.0009624		20.03	0.151947	2	1247.65	-0.639821	20.0289	0
	High	YHGNVMLLR	1	1	1	P49327		0	6.67721e+06	0	0.002073		19.28	0.181179	2	1102.58	0.587939	29.6703	0
	High	FDLSQNHPLGMAIFLK	1	1	1	P49327		0	3.22921e+06	0	0.001713		18.99	0.19306	3	1830.95	-1.26883	54.9493	0
	High	FcFTPHTEEGcLSER	2	1	1	P49327	C2(Methylthio); C11(Methylthio)	0	1.13969e+07	0	2.411e-05		18.85	0.0247602	2	1847.72	-0.760205	45.0569	0
	High	SNMGHPEPASGLAALAK	2	1	1	P49327		0	1.83385e+07	0	0.0008809		18.83	0.187213	3	1650.82	-3.01531	32.3546	0
	High	GYDYGPHFQGILEASLEGDSGR	1	1	1	P49327		0	1.72434e+07	0	1.405e-05		17.8	0.150193	3	2368.08	0.317438	52.2924	0
	High	GTHTGVWVGVSGSETSEALSR	1	1	1	P49327		0	9706103	0	0.0002119		15.13	0.478767	3	2117.03	0.505122	36.1943	0
	High	SLLVNPEGPTLmR	1	1	1	P49327	M12(Oxidation)	0	3.69215e+06	0	0.0003525		12.92	0.653446	2	1442.77	-1.2669	37.3191	0
	High	SLYQSAGVAPESFEYIEAHGTGTK	2	1	1	P49327		0	8.49354e+07	0	0.003122		11.98	0.92228	2	2542.21	-0.171184	45.118	0
	High	ALGLGVEQLPVVFEDVVLHQATILPK	1	1	1	P49327		0	8.49897e+06	0	6.873e-05		11.45	0.293619	3	2785.59	0.732972	65.4149	0
	High	LFDHPESPTPNPTEPLFLAQAEVYK	1	1	1	P49327		0	31991680	0	0.0009343		11.29	1.35601	3	2840.41	-0.398256	53.4718	0
	High	LYTLQDK	1	1	1	P49327		0	1.7053e+07	0.001	0.009069		27.72	0.011495	2	880.479	1.78335	24.0282	0
	High	VTAIHIDPATHR	2	1	1	P49327		0	1.27497e+07	0.001	0.009483		23.23	0.072251	2	1330.73	2.41701	22.1084	0
	High	MVVPGLDGAQIPR	2	1	1	P49327		0	5.59657e+07	0.001	0.005832		20.03	0.107257	2	1352.73	-0.75893	43.6749	0
	High	LSIPTYGLQcTR	2	1	1	P49327	C10(Methylthio)	0	3.151e+07	0.001	0.008919		18.86	0.15537	2	1397.69	-0.812064	48.6521	0
	High	DGVVRPLK	1	1	1	P49327		0	4.86817e+06	0.001	0.01947		18.63	0.0459245	2	883.535	-0.867443	18.9899	0
	High	WVcSSLR	2	1	1	P49327	C3(Methylthio)	0	8.29382e+06	0.001	0.008468		17.21	0.096955	2	896.412	0.598769	41.5506	0
	High	QEPLLIGSTK	2	1	1	P49327		0	3.01044e+07	0.001	0.01981		14.93	0.403314	2	1085.61	-5.38487	29.6139	0
	High	TFcPAHK	1	1	1	P49327	C3(Methylthio)	0	9.73451e+06	0.001	0.00578		14.23	0.137814	2	849.375	-0.00229268	20.8455	0
	High	EQGVTFPSGDIQEQLIR	1	1	1	P49327		0	6.24656e+07	0.003	0.04728		14.78	0.538908	2	1916.97	-1.18915	46.862	0
	High	RQQEQQVPILEK	1	1	1	P49327		0	7.97129e+06	0.003	0.0421		12.35	0.602477	3	1495.82	-0.729949	25.4499	1
	High	cPPGVVPAcHNSK	1	1	1	P49327	C1(Methylthio); C9(Methylthio)	0	4.84642e+06	0.005	0.08706		14.87	0.123818	2	1400.59	-0.928316	28.6621	0
P14618	Pyruvate kinase PKM OS=Homo sapiens OX=9606 GN=PKM PE=1 SV=4 - [KPYM_HUMAN]	1587.06	62.34	1	25	25	83	1.49904e+08	531	57.9	7.84033	0.00931851
	A3	Sequence	# PSMs	# Proteins	# Protein Groups	Protein Group Accessions	Modifications	ΔCn	Area	q-Value	PEP		IonScore	Exp Value	Charge	MH+ [Da]	ΔM [ppm]	RT [min]	# Missed Cleavages
	High	FGVEQDVDMVFASFIR	4	1	1	P14618		0	6.87991e+06	0	5.789e-10		92.38	7.45744e-09	2	1859.9	-0.352626	65.2824	0
	High	LAPITSDPTEATAVGAVEASFK	4	1	1	P14618		0	1.00654e+08	0	7.707e-12		85.06	5.23973e-08	2	2175.12	-0.272197	52.394	0
	High	FDEILEASDGIMVAR	4	1	1	P14618		0	8.09951e+07	0	1.965e-10		79.47	1.34446e-07	2	1665.82	1.02826	48.9361	0
	High	IYVDDGLISLQVK	2	1	1	P14618		0	9.36396e+07	0	1.736e-08		65.59	3.16086e-06	2	1462.81	-0.499432	49.7056	0
	High	GADFLVTEVENGGSLGSK	3	1	1	P14618		0	1.35898e+08	0	4.793e-09		65.14	4.73073e-06	2	1779.88	1.98491	47.0976	0
	High	FGVEQDVDmVFASFIR	2	1	1	P14618	M9(Oxidation)	0	592562	0	1.125e-09		63.66	5.85516e-06	2	1875.89	-0.176765	64.553	0
	High	LDIDSPPITAR	2	1	1	P14618		0	8.49212e+07	0	3.305e-06		61.41	7.19156e-06	2	1197.65	0.87154	33.8218	0
	High	ITLDNAYMEK	2	1	1	P14618		0	7.12887e+07	0	2.019e-05		57.16	1.89425e-05	2	1197.58	-0.48665	32.9899	0
	High	ccSGAIIVLTK	2	1	1	P14618	C1(Methylthio); C2(Methylthio)	0	3.75701e+06	0	8.441e-07		56.77	2.01963e-05	2	1199.57	0.233582	47.8437	0
	High	AGKPVIcATQMLESMIK	6	1	1	P14618	C7(Methylthio)	0	2.41892e+07	0	3.907e-08		54.22	6.13077e-05	2	1865.94	0.0784134	58.1289	0
	High	AEGSDVANAVLDGADcImLSGETAK	2	1	1	P14618	C16(Methylthio); M18(Oxidation)	0	2.53164e+06	0	3.179e-07		52.99	3.41593e-05	2	2499.11	0.435088	55.6457	0
	High	EAEAAIYHLQLFEELR	4	1	1	P14618		0	8.56876e+06	0	1.548e-07		52.9	9.43665e-05	2	1931.99	-0.304349	54.4131	0
	High	cDENILWLDYK	2	1	1	P14618	C1(Methylthio)	0	4.5175e+07	0	1.239e-05		52.8	3.46373e-05	2	1457.64	-0.02319	53.3698	0
	High	GSGTAEVELK	2	1	1	P14618		0	4.06529e+07	0	9.641e-06		52.7	7.84066e-05	2	990.509	-1.07867	20.4581	0
	High	NTGIIcTIGPASR	2	1	1	P14618	C6(Methylthio)	0	5.84839e+07	0	2.965e-05		49.69	0.000148211	2	1348.67	0.0592785	42.5376	0
	High	ITLDNAYmEK	2	1	1	P14618	M8(Oxidation)	0	7.98703e+06	0	1.774e-05		48.22	0.000129568	2	1213.58	-0.71598	27.5072	0
	High	GVNLPGAAVDLPAVSEK	4	1	1	P14618		0	2.0668e+08	0	2.208e-07		46.52	0.000276326	2	1636.89	-0.081155	43.6641	0
	High	GDYPLEAVR	2	1	1	P14618		0	6.16355e+07	0	1.163e-05		45.03	0.000359588	2	1019.52	-0.307869	30.391	0
	High	DPVQEAWAEDVDLR	6	1	1	P14618		0	1.07135e+08	0	5.781e-05		43.47	0.000418295	2	1642.77	-1.20825	47.6753	0
	High	AEGSDVANAVLDGADcIMLSGETAK	6	1	1	P14618	C16(Methylthio)	0	3.12282e+07	0	2.475e-08		41.16	0.000627789	2	2483.11	-0.233458	62.0855	0
	High	GDLGIEIPAEK	2	1	1	P14618		0	9.82775e+07	0	0.0005868		34.97	0.00262696	2	1141.61	-0.506917	36.8815	0
	High	TATESFASDPILYRPVAVALDTK	3	1	1	P14618		0	9.76689e+07	0	0.0006558		33.12	0.00831236	2	2465.27	-9.72842	52.8151	0
	High	MQHLIAR	2	1	1	P14618		0	1.73767e+07	0	0.000678		25.39	0.014887	2	868.482	-0.546066	18.9247	0
	High	VNFAMNVGK	4	1	1	P14618		0	3.3994e+07	0	0.0001018		24.93	0.0388853	2	979.503	0.266627	30.9141	0
	High	APIIAVTR	2	1	1	P14618		0	7.98579e+07	0	0.0007733		24.69	0.00577363	2	840.53	0.203171	26.0068	0
	High	KGVNLPGAAVDLPAVSEK	3	1	1	P14618		0	1.38223e+07	0	0.0008633		21.44	0.0714205	2	1764.98	-1.59644	39.6373	1
	High	LNFSHGTHEYHAETIK	2	1	1	P14618		0	3.08826e+07	0	8.756e-05		13.97	0.533153	3	1883.9	0.456903	24.0598	0
	High	GIFPVLcK	2	1	1	P14618	C7(Methylthio)	0	3.34521e+07	0.001	0.01327		25.45	0.0265145	2	922.489	-0.400342	53.2266	0
P35579	Myosin-9 OS=Homo sapiens OX=9606 GN=MYH9 PE=1 SV=4 - [MYH9_HUMAN]	1552.25	35.97	1	50	55	102	2.9663e+07	1960	226.392	5.60498	0.0114517
	A3	Sequence	# PSMs	# Proteins	# Protein Groups	Protein Group Accessions	Modifications	ΔCn	Area	q-Value	PEP		IonScore	Exp Value	Charge	MH+ [Da]	ΔM [ppm]	RT [min]	# Missed Cleavages
	High	LEGDSTDLSDQIAELQAQIAELK	2	1	1	P35579		0	1.80427e+06	0	2.503e-10		94.09	6.64851e-09	2	2487.25	-0.216397	60.8746	0
	High	TQLEELEDELQATEDAK	2	1	1	P35579		0	1.51519e+07	0	1.121e-10		70.27	9.96107e-07	2	1961.92	-1.39667	51.2586	0
	High	ELEDATETADAMNR	2	1	1	P35579		0	2.62641e+07	0	2.217e-07		62.2	2.68139e-06	2	1565.68	0.215369	26.0722	0
	High	IAEFTTNLTEEEEK	2	1	1	P35579		0	3.6526e+07	0	1.34e-06		61.48	7.75223e-06	2	1653.78	-0.819989	35.8381	0
	High	NFINNPLAQADWAAK	2	1	1	P35579		0	1.97127e+07	0	1.016e-08		61.38	1.05164e-05	2	1672.84	0.0146935	50.5207	0
	High	NTDQASMPDNTAAQK	2	1	1	P35579		0	2.61989e+07	0	3.369e-06		61.16	2.98583e-06	2	1591.7	-0.334124	18.1539	0
	High	VISGVLQLGNIVFK	2	1	1	P35579		0	4.43482e+06	0	3.2e-06		58.54	5.87827e-06	2	1486.9	0.469865	58.0346	0
	High	IIGLDQVAGMSETALPGAFK	3	1	1	P35579		0	9.07992e+06	0	2.72e-09		58.48	2.24921e-05	2	2018.06	-0.73556	56.2338	0
	High	ASITALEAK	2	1	1	P35579		0	4.57154e+06	0	3.707e-05		56.54	2.90584e-05	2	903.514	-0.863026	24.7955	0
	High	TELEDTLDSTAAQQELR	2	1	1	P35579		0	1.25465e+07	0	9.146e-09		55.87	3.28703e-05	2	1919.92	-1.07159	38.8509	0
	High	QLLQANPILEAFGNAK	2	2	2	P35579;Q7Z406		0	1.28578e+07	0	5.843e-07		52.54	6.60265e-05	2	1726.95	-0.538404	56.32	0
	High	DLEAHIDSANK	2	1	1	P35579		0	8.43414e+06	0	9.107e-05		49.04	0.000124738	2	1212.59	3.06757	21.1729	0
	High	MQQNIQELEEQLEEEESAR	2	1	1	P35579		0	4.89318e+06	0	4.103e-09		46.4	0.000232523	2	2333.06	-0.344518	49.5028	0
	High	LQVELDNVTGLLSQSDSK	1	1	1	P35579		0	1.31151e+07	0	2.518e-08		46.16	0.000459996	2	1946.01	-0.0746872	51.7837	0
	High	LEVNLQAMK	2	1	1	P35579		0	6.62507e+06	0	0.0008064		44.1	0.000649705	2	1045.57	-0.592147	35.4502	0
	High	ELESQISELQEDLESER	2	1	1	P35579		0	1.11739e+07	0	8.594e-08		43.79	0.000438722	2	2033.95	-0.332515	51.6321	0
	High	ALEEAMEQK	2	1	1	P35579		0	9.65564e+06	0	0.0009891		42.21	0.000423827	2	1048.5	-0.726104	20.8183	0
	High	QLEEAEEEAQR	2	1	1	P35579		0	1.65303e+07	0	0.002574		39.77	0.000658992	2	1331.6	-7.12175	19.8186	0
	High	HEAMITDLEER	2	1	1	P35579		0	1.12323e+07	0	0.0009077		38.88	0.00086064	2	1343.61	-8.74945	29.3886	0
	High	VVFQEFR	1	1	1	P35579		0	5.41441e+06	0	0.00044		38.81	0.00122316	2	924.493	-0.72545	34.882	0
	High	KLEEEQIILEDQNcK	2	1	1	P35579	C14(Methylthio)	0	6.00672e+06	0	1.809e-05		38.54	0.00251226	2	1877.9	0.623799	37.8729	1
	High	ADEWLMK	2	1	1	P35579		0	2.48357e+06	0	0.003295		37.97	0.0015879	2	892.423	-0.529053	34.0844	0
	High	ALEQQVEEMK	2	1	1	P35579		0	22929422	0	0.0004069		36.91	0.00186389	2	1204.59	-0.763447	27.8591	0
	High	THEAQIQEMR	2	1	1	P35579		0	8.03885e+06	0	0.0001748		36.53	0.00223443	2	1242.59	0.822854	19.3238	0
	High	EMEAELEDERK	2	1	1	P35579		0	5.40449e+06	0	0.0008515		35.27	0.00218417	2	1378.62	1.38395	21.3957	1
	High	DLGEELEALK	2	1	1	P35579		0	4.34481e+06	0	0.00167		33.42	0.00477737	2	1116.58	-0.0596742	45.7296	0
	High	VEAQLQELQVK	2	1	1	P35579		0	5922815	0	0.0005697		32.66	0.00623301	2	1284.71	-0.842227	32.4724	0
	High	TEMEDLMSSK	2	1	1	P35579		0	6.84272e+06	0	0.0007634		32.4	0.00218667	2	1170.5	-1.57691	30.7412	0
	High	DFSALESQLQDTQELLQEENR	3	1	1	P35579		0	6.7781e+06	0	1.806e-08		31.96	0.00786442	2	2493.17	0.215326	57.4331	0
	High	DMFQETMEAMR	2	1	1	P35579		0	6.60941e+06	0	9.474e-05		31.61	0.0014495	2	1388.57	0.679778	49.4845	0
	High	SGFEPASLK	2	1	1	P35579		0	6379900	0	0.0001414		31.11	0.00882886	2	935.482	-0.975819	27.8794	0
	High	LTEMETLQSQLMAEK	2	1	1	P35579		0	1.7928e+07	0	3.944e-06		30.51	0.0128934	2	1751.86	-0.125063	47.0451	0
	High	LEEEQIILEDQNcK	2	1	1	P35579	C13(Methylthio)	0	6.73622e+06	0	8.889e-07		29.33	0.0126599	2	1749.8	0.110964	41.1021	0
	High	ANLQIDQINTDLNLER	1	1	1	P35579		0	1.89712e+07	0	1.472e-05		29.15	0.0182428	2	1869.97	1.06534	46.4529	0
	High	KEEELQAALAR	2	2	2	P35579;Q7Z406		0	1.26039e+07	0	0.003082		27.58	0.0251398	2	1257.68	0.327651	25.327	1
	High	KFDQLLAEEK	1	2	2	P35579;Q7Z406		0	8.30683e+06	0	0.0006906		27.49	0.0227253	2	1220.65	-1.13617	29.2652	1
	High	AGVLAHLEEER	2	1	1	P35579		0	5.0753e+06	0	0.000957		27.1	0.0333423	2	1223.64	-0.561171	31.0053	0
	High	SMEAEMIQLQEELAAAER	1	1	1	P35579		0	4.99686e+06	0	1.023e-06		27.06	0.0233195	3	2048.96	-0.823121	58.3584	0
	High	IAQLEEELEEEQGNTELINDR	2	1	1	P35579		0	4.54095e+06	0	0.0001426		26.74	0.0296571	2	2472.18	0.840373	46.4676	0
	High	FDQLLAEEK	2	2	2	P35579;Q7Z406		0	3.59501e+06	0	0.0002247		26.1	0.0332613	2	1092.56	0.0707288	29.9622	0
	High	IAQLEEQLDNETK	2	1	1	P35579		0	20255719	0	0.0002785		25.63	0.0391143	2	1530.76	-1.81144	31.7002	0
	High	EDQSILcTGESGAGK	2	2	2	P35579;Q7Z406	C7(Methylthio)	0	1.31967e+07	0	5.973e-05		24.45	0.0200996	2	1540.66	-1.71032	31.5414	0
	High	MEDSVGcLETAEEVK	2	1	1	P35579	C7(Methylthio)	0	1.1489e+07	0	5.149e-05		23.43	0.0136182	2	1685.71	0.755238	42.4996	0
	High	NLPIYSEEIVEMYK	2	1	1	P35579		0	9.92244e+06	0	8.153e-05		22.47	0.0758761	2	1727.85	-1.40406	53.372	0
	High	FLSNGHVTIPGQQDK	2	1	1	P35579		0	5.38941e+06	0	0.0006406		19.94	0.14651	2	1640.84	-1.41495	30.1807	0
	High	LQQELDDLLVDLDHQR	2	1	1	P35579		0	1.27301e+07	0	0.000443		19.47	0.192065	3	1949.99	-0.725203	54.9027	0
	High	HSQAVEELAEQLEQTK	2	1	1	P35579		0	6.61177e+06	0	3.49e-05		17.9	0.249759	3	1839.91	-1.39976	42.6972	0
	High	VEDMAELTcLNEASVLHNLK	1	1	1	P35579	C9(Methylthio)	0	8.1202e+06	0	0.0006968		16.83	0.266626	3	2275.08	0.243242	56.1084	0
	High	IMGIPEEEQMGLLR	2	1	1	P35579		0	1.60302e+07	0	0.0004798		14.44	0.519838	2	1615.82	-1.69075	49.7165	0
	High	EEVGEEAIVELVENGK	1	1	1	P35579		0	1.92953e+07	0	0.0004146		12.92	0.648341	2	1743.86	-1.68436	54.1536	0
	High	VSHLLGINVTDFTR	1	1	1	P35579		0	3.264e+06	0	0.0001876		10.06	1.42024	3	1571.85	-1.54188	47.8975	0
	High	NTDQASmPDNTAAQK	1	1	1	P35579	M7(Oxidation)	0	164683	0.001	0.004585		18.84	0.0568184	2	1607.7	-0.280967	14.8145	0
	High	KLEGDSTDLSDQIAELQAQIAELK	1	1	1	P35579		0	3.76926e+06	0.001	0.01669		15.27	0.451693	3	2615.34	0.419438	59.1476	1
	High	QQQLTAMK	2	1	1	P35579		0	2.58423e+06	0.001	0.01459		14.65	0.471306	2	947.498	0.569272	19.4932	0
	High	FVSELWK	1	1	1	P35579		0	4.12463e+06	0.002	0.02141		21.87	0.0640378	2	908.484	-4.11343	39.9537	0
	High	LVWVPSDK	1	1	1	P35579		0	2.00048e+06	0.005	0.07449		16.26	0.176261	2	943.522	-2.74285	34.5	0
P63261	Actin, cytoplasmic 2 OS=Homo sapiens OX=9606 GN=ACTG1 PE=1 SV=1 - [ACTG_HUMAN]	1483.93	63.73	1	1	16	95	6.05308e+08	375	41.7658	5.47803	0.0106658
	A3	Sequence	# PSMs	# Proteins	# Protein Groups	Protein Group Accessions	Modifications	ΔCn	Area	q-Value	PEP		IonScore	Exp Value	Charge	MH+ [Da]	ΔM [ppm]	RT [min]	# Missed Cleavages
	High	LcYVALDFEQEMATAASSSSLEK	9	2	2	P60709;P63261	C2(Methylthio)	0	2.0005e+07	0	2.641e-11		107.69	1.27662e-10	2	2539.14	-0.487837	61.2645	0
	High	eEEIAALVIDNGSGMcK	3	1	1	P63261	N-Term(Acetyl); C16(Methylthio)	0	1.24782e+08	0	1.203e-10		100.51	5.91319e-10	2	1866.83	-0.137544	62.1989	0
	High	eEEIAALVIDNGSGmcK	2	1	1	P63261	N-Term(Acetyl); M15(Oxidation); C16(Methylthio)	0	8.72869e+06	0	2.104e-08		79.07	9.41485e-08	2	1882.82	-1.26083	58.7783	0
	High	AGFAGDDAPR	3	4	3	P60709;P68032;P63261		0	4.38329e+08	0	7.436e-06		56.09	1.13177e-05	2	976.448	-0.500549	20.3546	0
	High	KDLYANTVLSGGTTMYPGIADR	4	2	2	P60709;P63261		0	4.17699e+07	0	2.716e-07		55.57	4.93651e-05	2	2343.16	-1.11823	44.4037	1
	High	GYSFTTTAER	7	2	2	P60709;P63261		0	5.17884e+08	0	8.338e-06		53.67	2.46983e-05	2	1132.53	0.164153	27.6397	0
	High	DSYVGDEAQSK	7	4	3	P60709;P68032;P63261		0	3.28889e+08	0	4.109e-06		51.68	3.53186e-05	2	1198.52	0.393298	18.6493	0
	High	EITALAPSTMK	8	4	3	P60709;P68032;P63261		0	4.10976e+08	0	0.0008437		51.49	0.000113178	2	1161.62	0.529307	30.0502	0
	High	DLYANTVLSGGTTMYPGIADR	4	2	2	P60709;P63261		0	3.08747e+08	0	1.657e-08		48.32	0.000218638	2	2215.07	-0.411682	49.9913	0
	High	DLTDYLMK	2	5	4	Q562R1;P60709;P68032;P63261		0	1.51071e+08	0	0.001391		39.96	0.000681246	2	998.487	0.635737	43.6096	0
	High	SYELPDGQVITIGNER	11	5	4	Q562R1;P60709;P68032;P63261		0	8.41108e+08	0	3.514e-05		38.3	0.00235918	2	1790.89	-0.122882	49.1916	0
	High	IWHHTFYNELR	2	4	3	P60709;P68032;P63261		0	9.24442e+06	0	1.708e-06		37.2	0.00229608	3	1515.75	0.0325881	60.5569	0
	High	EITALAPSTmK	2	4	3	P60709;P68032;P63261	M10(Oxidation)	0	3.59113e+07	0	0.0007023		35.04	0.00454326	2	1177.61	-0.239121	24.3429	0
	High	HQGVMVGMGQK	4	5	4	Q562R1;P60709;P68032;P63261		0	4.04943e+08	0	5.188e-05		33.09	0.00429544	2	1171.57	-0.0331003	21.0591	0
	High	VAPEEHPVLLTEAPLNPK	4	2	2	P60709;P63261		0	4.56933e+08	0	5.232e-05		32.84	0.00603195	2	1954.06	-0.687465	37.5318	0
	High	DLYANTVLSGGTTmYPGIADR	2	2	2	P60709;P63261	M14(Oxidation)	0	1.64125e+07	0	9.803e-08		32.13	0.0083892	2	2231.06	0.0101768	45.8659	0
	High	HQGVMVGmGQK	5	5	4	Q562R1;P60709;P68032;P63261	M8(Oxidation)	0	2.49863e+07	0	0.003625		30.77	0.00665836	2	1187.57	-0.479143	16.5137	0
	High	QEYDESGPSIVHR	10	2	2	P60709;P63261		0	3.58497e+08	0	0.0001734		27.91	0.0145627	3	1516.7	0.456248	25.0665	0
	High	cPEALFQPSFLGMEScGIHETTFNSImK	1	2	2	P60709;P63261	C1(Methylthio); C16(Methylthio); M27(Oxidation)	0	3.58282e+06	0	0.0003905		16.27	0.115663	3	3225.39	-0.0319206	59.2259	0
	High	TTGIVMDSGDGVTHTVPIYEGYALPHAILR	1	2	2	P60709;P63261		0	4.71701e+06	0	0.0002106		15.32	0.536121	3	3183.61	-1.36975	52.163	0
	High	cPEALFQPSFLGMEScGIHETTFNSIMK	2	2	2	P60709;P63261	C1(Methylthio); C16(Methylthio)	0	4.61515e+07	0	9.497e-05		14.55	0.184145	3	3209.4	0.855804	64.0034	0
	High	DLTDYLmK	2	5	4	Q562R1;P60709;P68032;P63261	M7(Oxidation)	0	1.0937e+07	0.001	0.003988		28.35	0.00979659	2	1014.48	0.163213	36.8176	0
Q15149	Plectin OS=Homo sapiens OX=9606 GN=PLEC PE=1 SV=3 - [PLEC_HUMAN]	1471.28	20.03	1	73	76	124	1.25286e+07	4684	531.466	5.96045	0.0139216
	A3	Sequence	# PSMs	# Proteins	# Protein Groups	Protein Group Accessions	Modifications	ΔCn	Area	q-Value	PEP		IonScore	Exp Value	Charge	MH+ [Da]	ΔM [ppm]	RT [min]	# Missed Cleavages
	High	SQVMDEATALQLR	2	1	1	Q15149		0	2.57039e+06	0	4.952e-09		88.75	1.97361e-08	2	1461.74	-0.459582	38.8224	0
	High	GIYQSLEGAVQAGQLK	2	1	1	Q15149		0	5.44894e+06	0	4.039e-10		61.11	1.12684e-05	2	1661.89	-0.435611	48.6358	0
	High	GGAEGELQALR	1	1	1	Q15149		0	3.02038e+06	0	1.022e-05		52.26	6.24007e-05	2	1100.57	-0.799755	29.4518	0
	High	IIITVVEEQEQK	1	1	1	Q15149		0	8.09007e+06	0	1.566e-06		50.63	0.000116338	2	1428.79	-0.697561	35.8526	0
	High	GLFDEEMNEILTDPSDDTK	2	1	1	Q15149		0	2.77942e+06	0	7.309e-08		50.37	5.60183e-05	2	2168.95	-0.428179	55.8248	0
	High	QEQIQAMPLADSQAVR	2	1	1	Q15149		0	6.25124e+06	0	9.09e-09		50.04	0.000134753	2	1784.89	-0.893342	34.872	0
	High	QLAEEDLAQQR	2	1	1	Q15149		0	8.91344e+06	0	1.191e-05		48.24	0.00018896	2	1300.65	0.458672	24.451	0
	High	LLDAQLSTGGIVDPSK	2	1	1	Q15149		0	9.53906e+06	0	4.63e-07		47.68	0.000211554	2	1613.87	-0.530695	39.6849	0
	High	LSYTQLLR	2	1	1	Q15149		0	4.05964e+06	0	0.0001021		46.18	0.000107241	2	993.573	0.204626	41.394	0
	High	cVEDPETGLcLLPLTDK	2	1	1	Q15149	C1(Methylthio); C10(Methylthio)	0	4.54936e+06	0	3.805e-08		44.59	0.000269341	2	1937.87	-0.227697	57.6882	0
	High	AGTLSITEFADMLSGNAGGFR	2	1	1	Q15149		0	3.09095e+06	0	5.505e-09		43.84	0.000565875	2	2115.02	-0.127525	61.4056	0
	High	LQNVQIALDYLR	2	1	1	Q15149		0	3.55154e+06	0	1.954e-05		42.53	0.000723219	2	1445.81	-1.98239	51.5683	0
	High	APVPASELLASGVLSR	1	1	1	Q15149		0	9.42543e+06	0	3.921e-08		42.48	0.000457599	2	1566.88	-0.865865	48.273	0
	High	AQVEQELTTLR	2	1	1	Q15149		0	4.49674e+06	0	7.892e-06		41.9	0.000984623	2	1287.69	-0.952704	33.6674	0
	High	GFFDPNTEENLTYLQLMER	2	1	1	Q15149		0	2.95149e+06	0	1.382e-08		41.69	0.000894487	2	2317.08	-0.108514	58.1235	0
	High	VPVDVAYQR	2	2	2	Q15149;P58107		0	6.40813e+06	0	8.705e-06		41.28	0.00106497	2	1046.56	-0.511935	25.1689	0
	High	DYELQLVTYK	1	1	1	Q15149		0	2.17523e+06	0	0.000148		41.21	0.000764401	2	1271.65	0.256287	43.3361	0
	High	DPYSGSTISLFQAMQK	1	1	1	Q15149		0	2.033e+06	0	7.516e-08		41.19	0.000855367	2	1772.85	-0.60092	51.736	0
	High	ALQALEELR	1	1	1	Q15149		0	3.35907e+06	0	0.0002629		40.88	0.000722675	2	1042.59	-0.733554	38.4029	0
	High	SLAAEEEAAR	2	1	1	Q15149		0	3.39703e+06	0	2.146e-05		40.87	0.000638403	2	1046.51	0.0562228	20.589	0
	High	LQEAGILSAEELQR	2	1	1	Q15149		0	4.72047e+06	0	9.466e-07		40.58	0.00124248	2	1556.83	-0.870756	39.5348	0
	High	KQEELQQLEQQR	2	1	1	Q15149		0	4.0909e+06	0	2.73e-06		39.72	0.00159989	2	1556.8	-1.63978	25.1248	1
	High	VPLDVAcAR	1	1	1	Q15149	C7(Methylthio)	0	3.35551e+06	0	0.0003331		37.95	0.00185976	2	989.492	0.891819	34.9463	0
	High	QLQLAQEAAQK	2	1	1	Q15149		0	7.20121e+06	0	0.0001091		37.44	0.00210953	2	1227.67	0.0046852	24.188	0
	High	QTNLENLDQAFSVAER	2	1	1	Q15149		0	6.89701e+06	0	9.897e-06		37.14	0.00330367	2	1834.89	-0.436967	47.8324	0
	High	QQEELLAEENQR	2	1	1	Q15149		0	7.10155e+06	0	6.385e-06		34.79	0.00401592	2	1486.71	0.0909422	25.2466	0
	High	VPLDEALQR	2	1	1	Q15149		0	7110525	0	0.0006265		34.56	0.00260709	2	1040.57	-0.359018	29.0435	0
	High	LPLLAVcDYK	2	1	1	Q15149	C7(Methylthio)	0	2.33201e+06	0	2.193e-05		34.16	0.0053719	2	1180.61	-0.406019	56.1326	0
	High	SDEGQLSPATR	2	1	1	Q15149		0	7.52156e+06	0	0.0007432		33.62	0.00384542	2	1160.55	-0.117662	19.0669	0
	High	LAAEQELIR	2	1	1	Q15149		0	4.57403e+06	0	2.241e-05		33.59	0.00371894	2	1042.59	0.437284	29.2312	0
	High	VQSGSESVIQEYVDLR	2	1	1	Q15149		0	9.31477e+06	0	3.929e-05		33.49	0.00676047	2	1808.9	-1.23564	49.7139	0
	High	VLALPEPSPAAPTLR	2	1	1	Q15149		0	1.04442e+07	0	0.0009131		33.2	0.00442733	2	1531.88	-0.329424	42.2149	0
	High	GGELVYTDSEAR	2	1	1	Q15149		0	7.34423e+06	0	0.0004473		33.05	0.00465723	2	1296.61	0.976745	25.2193	0
	High	LLDAQLATGGIVDPR	2	1	1	Q15149		0	6.73754e+06	0	1.089e-07		32.95	0.00509526	2	1538.85	-0.531843	42.3317	0
	High	FAEQTLR	1	1	1	Q15149		0	5.13386e+06	0	0.002065		32.13	0.00756253	2	864.457	-0.054688	21.7545	0
	High	MGIVGPEFK	2	1	1	Q15149		0	3.61855e+06	0	0.002613		31.2	0.0121372	2	977.514	1.59014	36.2161	0
	High	AQAEAQQPTFDALR	1	1	1	Q15149		0	3.58417e+06	0	5.613e-05		30	0.0153	2	1545.77	-0.394014	32.5579	0
	High	QLEMSAEAER	2	1	1	Q15149		0	4.06639e+06	0	8.537e-05		29.51	0.00710843	2	1163.54	-0.21059	22.5967	0
	High	QEELYSELQAR	2	1	1	Q15149		0	3.05754e+06	0	0.0005998		27.85	0.0196871	2	1365.66	-1.91736	34.0733	0
	High	AYSDPSTGEPATYGELQQR	2	1	1	Q15149		0	6.41581e+06	0	0.000129		27.36	0.0197428	2	2069.94	-0.900856	30.3593	0
	High	LEQLFQDEVAK	2	1	1	Q15149		0	5.23964e+06	0	0.0003375		26.86	0.0347216	2	1319.68	-1.08696	36.9987	0
	High	MVEGYQGLR	1	1	1	Q15149		0	3.70928e+06	0	0.00271		26.52	0.0230643	2	1052.52	-1.21356	27.207	0
	High	LcFEGLR	1	1	1	Q15149	C2(Methylthio)	0	1.52114e+06	0	0.001124		25.34	0.0138897	2	883.417	0.124788	42.7576	0
	High	DPYTEQTISLFQAMK	2	1	1	Q15149		0	1793206	0	1.123e-06		25.22	0.0396802	2	1771.86	0.851579	54.6193	0
	High	IISLETYNLLR	2	1	1	Q15149		0	4.27664e+06	0	0.0001316		25.15	0.0236756	2	1334.77	0.822013	52.0565	0
	High	LEDLLQDAQDEK	2	1	1	Q15149		0	5.91788e+06	0	0.001709		23.23	0.0520492	2	1416.68	-0.948511	35.7433	0
	High	SELELTLGK	1	1	1	Q15149		0	1.7226e+06	0	0.0007987		23.07	0.0520298	2	989.552	0.285019	35.1775	0
	High	LKAEAELLQQQK	2	1	1	Q15149		0	2498408	0	0.0009045		22.52	0.055416	2	1398.79	-1.27877	25.7049	1
	High	SSSVGSSSSYPISPAVSR	2	1	1	Q15149		0	8.55479e+06	0	0.0001006		22.36	0.0830493	2	1754.86	0.583342	28.9419	0
	High	EQELQQTLQQEQSVLDQLR	1	1	1	Q15149		0	2.70248e+06	0	1.495e-05		20.84	0.142988	2	2313.17	-1.12675	53.6193	0
	High	GFFDPNTHENLTYR	1	1	1	Q15149		0	4.59382e+06	0	8.415e-05		18.98	0.138489	2	1710.79	-0.686836	38.7439	0
	High	SIQEELQQLR	1	1	1	Q15149		0	0	0	0.002456		18.42	0.194957	2	1243.66	0.0730656	41.0036	0
	High	NLLDEELQR	2	1	1	Q15149		0	3.7591e+06	0	0.002003		18.02	0.203512	2	1129.59	0.805302	37.0074	0
	High	DTHDQLSEPSEVR	2	1	1	Q15149		0	5.50002e+06	0	0.001926		17.37	0.202471	2	1512.7	2.98657	21.5811	0
	High	SLQEEHVAVAQLR	3	1	1	Q15149		0	5.20827e+06	0	0.0015		17.24	0.264319	2	1479.79	0.789866	28.6493	0
	High	FLEVQYLTGGLIEPDTPGR	1	1	1	Q15149		0	2.32701e+06	0	0.0002895		16.79	0.404164	2	2105.09	-0.736287	56.5082	0
	High	LTAEDLFEAR	1	1	1	Q15149		0	4.7092e+06	0	0.0009671		15.89	0.376143	2	1164.59	0.781734	43.3882	0
	High	LLDPEDVDVPQPDEK	1	1	1	Q15149		0	1.15667e+07	0	0.0003348		14.7	0.447274	2	1708.83	-0.855456	37.5887	0
	High	LLEAQIATGGIIDPEESHR	1	1	1	Q15149		0	6.41256e+06	0	0.001286		11.63	1.13366	3	2049.06	-0.12887	41.7911	0
	High	ANELQLR	2	1	1	Q15149		0	1.9926e+06	0.001	0.005774		34.04	0.0038854	2	843.468	-0.243148	23.3113	0
	High	AQLEPVASPAK	2	1	1	Q15149		0	7.16897e+06	0.001	0.01897		23.21	0.0329495	2	1110.62	-0.00653326	21.5331	0
	High	VLADPSDDTK	2	2	2	Q15149;P58107		0	1.55748e+07	0.001	0.01764		22.27	0.0551421	2	1060.52	-0.30442	18.215	0
	High	FPVTDAVNK	2	1	1	Q15149		0	3.17804e+06	0.001	0.004151		20.59	0.130509	2	990.526	0.100986	24.9103	0
	High	SWSLATFR	1	1	1	Q15149		0	1.46473e+06	0.001	0.01007		20.25	0.0915739	2	967.5	-0.0113151	45.7562	0
	High	EGLTSIEEVTK	1	1	1	Q15149		0	1.47097e+06	0.001	0.01049		20.13	0.141694	2	1205.62	-4.15721	33.6261	0
	High	LLEAAAQSTK	1	1	1	Q15149		0	3.89991e+06	0.001	0.007919		19.07	0.187678	2	1031.57	0.322446	19.3841	0
	High	GYFDEEMNR	1	2	2	Q15149;P58107		0	2.82992e+06	0.001	0.004607		13.82	0.0892151	2	1160.47	-2.14891	31.6595	0
	High	QEQALLEEIER	2	1	1	Q15149		0	2.73629e+06	0.001	0.01244		11.9	0.823209	2	1357.7	0.0877592	40.8686	0
	High	cVEDPETGLR	2	1	1	Q15149	C1(Methylthio)	0	4.53726e+06	0.002	0.03461		19.3	0.0428838	2	1164.5	0.572825	26.4026	0
	High	SLSAIYLEK	1	1	1	Q15149		0	1.91902e+06	0.002	0.02517		16.48	0.163056	2	1023.57	-0.64731	35.469	0
	High	LQLEETDHQK	1	1	1	Q15149		0	3.95877e+06	0.002	0.03594		16.25	0.201567	2	1240.62	-0.772983	19.2225	0
	High	DALDGPAAEAEPEHSFDGLR	1	1	1	Q15149		0	2.44775e+06	0.002	0.03142		12.18	0.535727	3	2096.95	-0.732807	38.0704	0
	High	QLLEEELAR	1	1	1	Q15149		0	3.01421e+06	0.002	0.03123		10.93	1.04537	2	1100.6	0.980763	33.8616	0
	High	ELAEQELEK	1	1	1	Q15149		0	4.35434e+06	0.003	0.04141		12.33	0.625725	2	1088.55	-0.566795	23.0709	0
	High	LQLEAcETR	2	1	1	Q15149	C6(Methylthio)	0	3.69131e+06	0.004	0.06239		25.4	0.0239375	2	1108.51	-1.18558	35.5835	0
	High	LSIYNALK	1	1	1	Q15149		0	1.90031e+06	0.005	0.07136		19.55	0.0781968	2	921.541	1.09397	38.1278	0
P60709	Actin, cytoplasmic 1 OS=Homo sapiens OX=9606 GN=ACTB PE=1 SV=1 - [ACTB_HUMAN]	1465.03	63.73	1	1	16	96	6.05308e+08	375	41.7097	5.47803	0.010778
	A3	Sequence	# PSMs	# Proteins	# Protein Groups	Protein Group Accessions	Modifications	ΔCn	Area	q-Value	PEP		IonScore	Exp Value	Charge	MH+ [Da]	ΔM [ppm]	RT [min]	# Missed Cleavages
	High	LcYVALDFEQEMATAASSSSLEK	9	2	2	P60709;P63261	C2(Methylthio)	0	2.0005e+07	0	2.641e-11		107.69	1.27662e-10	2	2539.14	-0.487837	61.2645	0
	High	dDDIAALVVDNGSGMcK	4	1	1	P60709	N-Term(Acetyl); C16(Methylthio)	0	3.18859e+08	0	6.805e-09		75.75	1.25054e-07	2	1810.77	0.183077	59.5199	0
	High	dDDIAALVVDNGSGmcK	2	1	1	P60709	N-Term(Acetyl); M15(Oxidation); C16(Methylthio)	0	1.60967e+07	0	1.743e-08		65.46	8.67561e-07	2	1826.76	-0.442902	53.4655	0
	High	AGFAGDDAPR	3	4	3	P60709;P68032;P63261		0	4.38329e+08	0	7.436e-06		56.09	1.13177e-05	2	976.448	-0.500549	20.3546	0
	High	KDLYANTVLSGGTTMYPGIADR	4	2	2	P60709;P63261		0	4.17699e+07	0	2.716e-07		55.57	4.93651e-05	2	2343.16	-1.11823	44.4037	1
	High	GYSFTTTAER	7	2	2	P60709;P63261		0	5.17884e+08	0	8.338e-06		53.67	2.46983e-05	2	1132.53	0.164153	27.6397	0
	High	DSYVGDEAQSK	7	4	3	P60709;P68032;P63261		0	3.28889e+08	0	4.109e-06		51.68	3.53186e-05	2	1198.52	0.393298	18.6493	0
	High	EITALAPSTMK	8	4	3	P60709;P68032;P63261		0	4.10976e+08	0	0.0008437		51.49	0.000113178	2	1161.62	0.529307	30.0502	0
	High	DLYANTVLSGGTTMYPGIADR	4	2	2	P60709;P63261		0	3.08747e+08	0	1.657e-08		48.32	0.000218638	2	2215.07	-0.411682	49.9913	0
	High	DLTDYLMK	2	5	4	Q562R1;P60709;P68032;P63261		0	1.51071e+08	0	0.001391		39.96	0.000681246	2	998.487	0.635737	43.6096	0
	High	SYELPDGQVITIGNER	11	5	4	Q562R1;P60709;P68032;P63261		0	8.41108e+08	0	3.514e-05		38.3	0.00235918	2	1790.89	-0.122882	49.1916	0
	High	IWHHTFYNELR	2	4	3	P60709;P68032;P63261		0	9.24442e+06	0	1.708e-06		37.2	0.00229608	3	1515.75	0.0325881	60.5569	0
	High	EITALAPSTmK	2	4	3	P60709;P68032;P63261	M10(Oxidation)	0	3.59113e+07	0	0.0007023		35.04	0.00454326	2	1177.61	-0.239121	24.3429	0
	High	HQGVMVGMGQK	4	5	4	Q562R1;P60709;P68032;P63261		0	4.04943e+08	0	5.188e-05		33.09	0.00429544	2	1171.57	-0.0331003	21.0591	0
	High	VAPEEHPVLLTEAPLNPK	4	2	2	P60709;P63261		0	4.56933e+08	0	5.232e-05		32.84	0.00603195	2	1954.06	-0.687465	37.5318	0
	High	DLYANTVLSGGTTmYPGIADR	2	2	2	P60709;P63261	M14(Oxidation)	0	1.64125e+07	0	9.803e-08		32.13	0.0083892	2	2231.06	0.0101768	45.8659	0
	High	HQGVMVGmGQK	5	5	4	Q562R1;P60709;P68032;P63261	M8(Oxidation)	0	2.49863e+07	0	0.003625		30.77	0.00665836	2	1187.57	-0.479143	16.5137	0
	High	QEYDESGPSIVHR	10	2	2	P60709;P63261		0	3.58497e+08	0	0.0001734		27.91	0.0145627	3	1516.7	0.456248	25.0665	0
	High	cPEALFQPSFLGMEScGIHETTFNSImK	1	2	2	P60709;P63261	C1(Methylthio); C16(Methylthio); M27(Oxidation)	0	3.58282e+06	0	0.0003905		16.27	0.115663	3	3225.39	-0.0319206	59.2259	0
	High	TTGIVMDSGDGVTHTVPIYEGYALPHAILR	1	2	2	P60709;P63261		0	4.71701e+06	0	0.0002106		15.32	0.536121	3	3183.61	-1.36975	52.163	0
	High	cPEALFQPSFLGMEScGIHETTFNSIMK	2	2	2	P60709;P63261	C1(Methylthio); C16(Methylthio)	0	4.61515e+07	0	9.497e-05		14.55	0.184145	3	3209.4	0.855804	64.0034	0
	High	DLTDYLmK	2	5	4	Q562R1;P60709;P68032;P63261	M7(Oxidation)	0	1.0937e+07	0.001	0.003988		28.35	0.00979659	2	1014.48	0.163213	36.8176	0
P53396	ATP-citrate synthase OS=Homo sapiens OX=9606 GN=ACLY PE=1 SV=3 - [ACLY_HUMAN]	1371.09	45.14	1	38	38	99	7.11167e+07	1101	120.762	7.32764	0.0111149
	A3	Sequence	# PSMs	# Proteins	# Protein Groups	Protein Group Accessions	Modifications	ΔCn	Area	q-Value	PEP		IonScore	Exp Value	Charge	MH+ [Da]	ΔM [ppm]	RT [min]	# Missed Cleavages
	High	DLVSSLTSGLLTIGDR	5	1	1	P53396		0	2.63409e+07	0	2.708e-10		84.34	5.54034e-08	2	1646.9	-0.282889	62.1895	0
	High	EEADEYIDIGALNGIFVLGR	4	1	1	P53396		0	1.18005e+07	0	1.056e-09		83.7	6.80394e-08	2	2194.1	0.147506	61.3712	0
	High	SGGMSNELNNIISR	2	1	1	P53396		0	8.36223e+07	0	3.273e-06		64.16	5.02656e-06	2	1491.72	0.00147292	41.5445	0
	High	LGLVGVNLTLDGVK	2	1	1	P53396		0	3.38024e+07	0	1.812e-06		62.93	2.77585e-06	2	1397.83	-6.87749	52.8023	0
	High	SGGmSNELNNIISR	2	1	1	P53396	M4(Oxidation)	0	3.85956e+06	0	5.407e-06		58.41	1.4349e-05	2	1507.72	-1.24082	34.2489	0
	High	FGGALDAAAK	2	1	1	P53396		0	34740762	0	2.785e-07		56.05	2.97976e-05	2	920.485	1.08143	23.8864	0
	High	GQELIYAGMPITEVFK	2	1	1	P53396		0	5.5999e+07	0	3.107e-07		55.88	3.43441e-05	2	1795.93	0.00442076	56.541	0
	High	AFDSGIIPMEFVNK	2	1	1	P53396		0	5.10168e+07	0	4.099e-07		52.51	8.58403e-05	2	1567.78	-0.195907	53.474	0
	High	AVQGMLDFDYVcSR	2	1	1	P53396	C12(Methylthio)	0	1.86722e+07	0	1.143e-06		51.6	3.63211e-05	2	1649.71	-0.467349	56.1711	0
	High	TIAIIAEGIPEALTR	3	1	1	P53396		0	4.13021e+07	0	4.074e-07		48.19	0.000106194	2	1567.9	-0.40726	54.0858	0
	High	MIVVLGEIGGTEEYK	4	1	1	P53396		0	3.89871e+07	0	1.309e-07		46.06	0.000379046	2	1637.84	-1.00842	48.7785	0
	High	QHFPATPLLDYALEVEK	3	1	1	P53396		0	3.56468e+07	0	6.436e-05		41.26	0.0011634	3	1971.02	0.108466	55.2427	0
	High	AIVWGMQTR	2	1	1	P53396		0	1.91862e+07	0	0.0003283		39.59	0.0016595	2	1061.56	-0.385885	37.5784	0
	High	GQELIYAGmPITEVFK	2	1	1	P53396	M9(Oxidation)	0	0	0	8.581e-06		39.31	0.00162349	2	1811.93	0.452821	51.3894	0
	High	VDATADYIcK	3	1	1	P53396	C9(Methylthio)	0	4.15863e+07	0	0.00104		39.29	0.000441602	2	1144.5	-0.82	35.1439	0
	High	TILSLMTR	2	1	1	P53396		0	2.61218e+07	0	0.0004705		39.13	0.00110573	2	934.539	-0.535577	43.0785	0
	High	WGDIEFPPPFGR	4	1	1	P53396		0	4.18377e+07	0	0.0005054		37.65	0.00184675	2	1417.69	-1.2932	56.0024	0
	High	SAYDSTMETMNYAQIR	2	1	1	P53396		0	6.12105e+07	0	1.333e-06		35.65	0.00144303	2	1880.82	-0.148991	40.9169	0
	High	HPWDDISYVLPEHMSM	4	1	1	P53396		0	1.46743e+07	0	4.641e-08		34.2	0.00250925	2	1956.86	-0.174481	55.4115	0
	High	LGQEATVGK	2	1	1	P53396		0	1.76179e+06	0	0.0003387		33.93	0.00529994	2	902.494	-0.510056	16.9047	0
	High	TTDGVYEGVAIGGDR	3	1	1	P53396		0	5.18175e+07	0	2.583e-05		33.34	0.00560771	2	1509.72	-0.961086	31.5741	0
	High	EAYPEEAYIADLDAK	2	1	1	P53396		0	6.22022e+07	0	2.468e-06		31.78	0.00574138	2	1697.79	0.379313	46.2029	0
	High	DEPSVAAMVYPFTGDHK	2	1	1	P53396		0	9.75422e+06	0	9.522e-07		30.55	0.00784133	2	1863.86	-1.14526	48.486	0
	High	SMGFIGHYLDQK	3	1	1	P53396		0	1.98329e+07	0	0.0007395		29.21	0.014454	2	1395.67	0.388344	42.864	0
	High	AFDSGIIPmEFVNK	2	1	1	P53396	M9(Oxidation)	0	3.75746e+06	0	0.0005557		26.91	0.0294353	2	1583.77	-1.839	47.5582	0
	High	SINNPDMR	2	1	1	P53396		0	1.39852e+07	0	0.001438		26.73	0.0102977	2	946.441	-0.443634	18.5443	0
	High	IGNTGGMLDNILASK	2	1	1	P53396		0	6.75254e+07	0	0.0005222		24.25	0.0490468	2	1503.78	-1.55854	47.5833	0
	High	EHEVTIFVR	2	1	1	P53396		0	8.32403e+06	0	0.0005743		23.75	0.0628328	2	1129.6	-0.0514477	30.4461	0
	High	DGVYVLDLAAK	3	1	1	P53396		0	2.94014e+07	0	0.0008112		22.32	0.0841108	2	1163.63	-0.0502452	44.7867	0
	High	SAYDSTMETmNYAQIR	1	1	1	P53396	M10(Oxidation)	0	2.11956e+06	0	0.0001562		22.19	0.0280836	2	1896.81	-0.813409	34.6803	0
	High	AKPAMPQDSVPSPR	1	1	1	P53396		0	2.44075e+07	0	0.0009181		21.49	0.10892	2	1480.76	-1.33472	22.6969	0
	High	LYRPGSVAYVSR	4	1	1	P53396		0	2.58547e+07	0	0.000113		20.92	0.0894051	3	1367.74	0.285913	27.1355	0
	High	LLQDHPWLLSQNLVVKPDQLIK	2	1	1	P53396		0	1.07487e+07	0	5.139e-05		20.65	0.0443412	3	2597.48	-0.517659	54.3009	0
	High	ILIIGGSIANFTNVAATFK	1	1	1	P53396		0	1.66259e+06	0	0.001459		12.17	0.448985	2	1950.1	-0.796667	62.9248	0
	High	GVTIIGPATVGGIKPGcFK	2	1	1	P53396	C17(Methylthio)	0	1.87711e+07	0	3.206e-05		10.09	1.29293	2	1861.01	-0.610984	48.9684	0
	High	GGPNYQEGLR	2	1	1	P53396		0	6.16882e+07	0.001	0.004951		31.11	0.00952588	2	1090.53	-0.565013	22.6127	0
	High	HLLVHAPEDK	2	1	1	P53396		0	7.83451e+06	0.001	0.01066		25.08	0.0485864	2	1158.62	-6.52945	19.8265	0
	High	IGNTGGmLDNILASK	2	1	1	P53396	M7(Oxidation)	0	1.80783e+06	0.001	0.003949		18.15	0.241912	2	1519.78	0.518611	38.0534	0
	High	YQDTPGVK	1	1	1	P53396		0	3.28023e+06	0.002	0.02908		19.55	0.138647	2	907.452	0.147337	17.8224	0
	High	EILIPVFK	1	1	1	P53396		0	2.68596e+07	0.002	0.0335		17.24	0.140655	2	958.597	-0.143755	50.4334	0
	High	YPGSTFMDHVLR	1	1	1	P53396		0	1.42592e+07	0.002	0.03496		11.99	0.727274	2	1422.68	0.012637	44.1638	0
	High	LIMGIGHR	2	1	1	P53396		0	1.08288e+07	0.004	0.05565		13.12	0.251077	2	896.512	-1.20864	26.1809	0
	High	EAGVFVPR	2	1	1	P53396		0	3.60216e+07	0.005	0.07078		24.71	0.0513859	2	874.478	-0.19142	27.1282	0
P05787	Keratin, type II cytoskeletal 8 OS=Homo sapiens OX=9606 GN=KRT8 PE=1 SV=7 - [K2C8_HUMAN]	1261.25	55.49	1	21	28	67	1.19945e+08	483	53.6711	5.59229	-
	A3	Sequence	# PSMs	# Proteins	# Protein Groups	Protein Group Accessions	Modifications	ΔCn	Area	q-Value	PEP		IonScore	Exp Value	Charge	MH+ [Da]	ΔM [ppm]	RT [min]	# Missed Cleavages
	High	SNMDNMFESYINNLR	3	1	1	P05787		0	3.51848e+07	0	1.148e-09		84.67	1.60361e-08	2	1847.8	-0.698501	57.2136	0
	High	SLDMDSIIAEVK	2	1	1	P05787		0	1.11334e+08	0	3.137e-09		83.73	7.20193e-08	2	1320.67	-0.141581	51.6143	0
	High	ASLEAAIADAEQR	5	1	1	P05787		0	9.10252e+07	0	1.998e-07		71.99	7.90515e-07	2	1344.68	0.273336	40.623	0
	High	LSELEAALQR	4	1	1	P05787		0	1.04923e+08	0	2.963e-07		69.82	1.77715e-06	2	1129.62	0.037286	36.121	0
	High	LEAELGNMQGLVEDFK	2	1	1	P05787		0	3.29922e+07	0	1.155e-10		68.52	1.89816e-06	2	1792.88	-0.0522412	54.53	0
	High	ELQSQISDTSVVLSMDNSR	2	1	1	P05787		0	6.63303e+07	0	9.307e-09		61.96	8.94698e-06	2	2109.01	0.142196	42.8397	0
	High	LEGLTDEINFLR	2	1	1	P05787		0	7.30529e+07	0	4.645e-08		60.3	1.51187e-05	2	1419.75	-0.372776	53.1126	0
	High	LALDIEIATYR	2	2	3	P05787;P08729;P04264		0	3.59497e+06	0	6.385e-07		59.85	1.18524e-05	2	1277.71	-0.0178161	50.3393	0
	High	YEELQSLAGK	2	1	1	P05787		0	1.2339e+08	0	1.055e-05		52.93	7.6909e-05	2	1137.58	0.0981473	29.6547	0
	High	ELQSQISDTSVVLSmDNSR	2	1	1	P05787	M15(Oxidation)	0	5.57333e+06	0	4.047e-08		52.18	7.56676e-05	2	2125.01	-0.453064	36.2661	0
	High	AQYEDIANR	3	1	1	P05787		0	9.61062e+07	0	6.324e-06		50.64	9.10442e-05	2	1079.51	0.558891	21.887	0
	High	EYQELMNVK	1	3	2	P02538;P05787		0	5.57074e+07	0	3.231e-05		50.64	8.84553e-05	2	1153.56	0.21375	30.5859	0
	High	SLDmDSIIAEVK	1	1	1	P05787	M4(Oxidation)	0	3.33028e+06	0	7.677e-05		49.48	0.000164571	2	1336.66	-1.63247	38.8733	0
	High	KLLEGEESR	2	3	3	P08670;P05787;P08729		0	1.61938e+07	0	2.238e-05		43.56	0.000691671	2	1060.56	1.06493	17.7673	1
	High	AEAESMYQIK	3	1	1	P05787		0	1.25112e+08	0	3e-06		43.33	0.000373935	2	1169.55	-0.977431	27.1244	0
	High	LVSESSDVLPK	2	1	1	P05787		0	6.28739e+07	0	0.0001402		42.66	0.000894301	2	1173.64	-0.350632	27.4794	0
	High	LQAEIEGLK	2	1	1	P05787		0	8.76087e+07	0	4.307e-05		40.95	0.000654874	2	1000.57	0.710095	29.6623	0
	High	DVDEAYMNK	2	1	1	P05787		0	2.00931e+07	0	8.341e-05		40.15	0.000362269	2	1084.46	-0.00539409	22.3869	0
	High	LLEGEESR	2	3	3	P08670;P05787;P08729		0	5.00217e+07	0	0.0003165		39.33	0.00130099	2	932.469	0.490455	18.4886	0
	High	QLETLGQEK	2	1	1	P05787		0	3.94468e+07	0	0.0003348		36.49	0.00264778	2	1045.55	0.306703	21.038	0
	High	QLYEEEIR	2	1	1	P05787		0	63521580	0	0.003514		35.4	0.00330222	2	1079.54	0.103316	27.4259	0
	High	NKYEDEINKR	3	5	4	P13647;P02538;P05787;P04264		0	2.70475e+07	0	0.001068		34.6	0.00454225	3	1308.65	-0.0705633	19.1982	2
	High	WSLLQQQK	3	1	1	P05787		0	7.65638e+07	0	0.001857		32.63	0.00690384	2	1030.57	-1.18502	35.9587	0
	High	LESGMQNMSIHTK	2	1	1	P05787		0	26151163	0	0.0002684		28.5	0.013631	2	1475.7	-1.41545	24.5595	0
	High	SNmDNMFESYINNLR	2	1	1	P05787	M3(Oxidation)	0	2.53397e+06	0	4.21e-05		22.27	0.0222347	2	1863.8	0.398406	53.8782	0
	High	TEISEMNR	2	1	1	P05787		0	4.45675e+07	0	0.001469		21.65	0.0468479	2	979.452	0.156567	19.7538	0
	High	FLEQQNK	1	6	5	P08670;P13647;P02538;P05787;P08729		0	813696	0	0.003012		20.46	0.134925	2	906.468	-0.322498	18.1858	0
	High	TEMENEFVLIK	1	1	1	P05787		0	6.50407e+07	0	0.0001594		16.13	0.337637	2	1352.68	-1.0962	45.2544	0
	High	TEmENEFVLIK	1	1	1	P05787	M3(Oxidation)	0	5.45087e+06	0.001	0.01276		18.59	0.154959	2	1368.67	-1.82756	40.0835	0
	High	TKTEISEMNR	1	1	1	P05787		0	7.59331e+06	0.002	0.02309		27.22	0.02589	2	1208.59	0.117914	18.4867	1
	High	EYQELmNVK	1	3	2	P02538;P05787	M6(Oxidation)	0	6.0113e+06	0.004	0.05456		10.77	0.812403	2	1169.55	0.90557	23.6372	0
	High	YEDEINKR	1	6	5	P13647;P35908;P02538;P05787;P04264		0	2.41184e+07	0.005	0.08144		24.43	0.0393031	2	1066.52	0.117946	17.2217	1
	High	ISSSSFSR	1	1	1	P05787		0	3.99367e+06	0.007	0.1102		18.93	0.0729247	2	870.43	-2.35436	20.2023	0
P11142	Heat shock cognate 71 kDa protein OS=Homo sapiens OX=9606 GN=HSPA8 PE=1 SV=1 - [HSP7C_HUMAN]	1163.29	42.88	1	19	22	58	1.37097e+08	646	70.8542	5.51611	0.00651173
	A3	Sequence	# PSMs	# Proteins	# Protein Groups	Protein Group Accessions	Modifications	ΔCn	Area	q-Value	PEP		IonScore	Exp Value	Charge	MH+ [Da]	ΔM [ppm]	RT [min]	# Missed Cleavages
	High	SINPDEAVAYGAAVQAAILSGDK	4	1	1	P11142		0	3.9285e+07	0	1.305e-10		76.69	3.51434e-07	2	2260.14	-0.595799	58.6529	0
	High	NSLESYAFNMK	2	1	1	P11142		0	2.14195e+07	0	2.932e-08		66.88	1.27172e-06	2	1303.6	-0.530256	41.4339	0
	High	SQIHDIVLVGGSTR	5	1	1	P11142		0	3.76686e+07	0	2.26e-07		64.14	4.18244e-06	2	1481.81	-1.20519	31.4643	0
	High	cNEIINWLDK	2	1	1	P11142	C1(Methylthio)	0	4.30784e+07	0	5.771e-06		60.72	7.32852e-06	2	1293.59	-1.36524	53.1145	0
	High	DAGTIAGLNVLR	2	1	1	P11142		0	5.17376e+07	0	1.557e-06		58.27	1.95851e-05	2	1199.67	0.434273	42.9564	0
	High	TTPSYVAFTDTER	2	2	2	P0DMV8;P11142		0	1.46346e+08	0	2.227e-06		57.29	1.66108e-05	2	1487.7	-0.307883	35.4567	0
	High	FEELNADLFR	3	1	1	P11142		0	4.33729e+07	0	1.067e-05		57.16	1.9904e-05	2	1253.62	1.55413	47.0997	0
	High	FDDAVVQSDMK	2	1	1	P11142		0	3.95083e+07	0	9.131e-07		55.38	2.05711e-05	2	1254.57	-0.264028	29.2055	0
	High	STAGDTHLGGEDFDNR	3	1	1	P11142		0	6.11865e+07	0	3.944e-06		52.17	2.24492e-05	2	1691.73	0.488689	23.9388	0
	High	VEIIANDQGNR	5	3	3	P0DMV8;P11021;P11142		0	1.33773e+08	0	1.362e-06		50.91	0.000116373	2	1228.63	0.495193	21.8887	0
	High	IINEPTAAAIAYGLDK	5	2	2	P11021;P11142		0	1.22447e+08	0	4.314e-07		48.67	0.000200351	2	1659.89	-0.502756	45.5984	0
	High	NQTAEKEEFEHQQK	2	1	1	P11142		0	1.22288e+07	0	4.415e-05		45.6	0.00028644	2	1745.81	-0.824022	16.8113	1
	High	NQVAMNPTNTVFDAK	2	1	1	P11142		0	1.31172e+08	0	1.882e-06		42.6	0.000656701	2	1649.79	-0.472851	34.9644	0
	High	LLQDFFNGK	2	1	1	P11142		0	2.82366e+07	0	0.0006932		39	0.00138482	2	1081.57	1.19828	44.2419	0
	High	VcNPIITK	2	1	1	P11142	C2(Methylthio)	0	3.491e+07	0	0.0005599		38.18	0.00206034	2	933.49	0.663825	29.9338	0
	High	SFYPEEVSSMVLTK	2	1	1	P11142		0	7.49823e+07	0	1.958e-06		36.62	0.0025697	2	1616.79	2.00388	49.8292	0
	High	GTLDPVEK	2	1	1	P11142		0	2.31195e+07	0	0.000554		31.32	0.00483327	2	858.456	-0.779322	20.4069	0
	High	EIAEAYLGK	2	1	1	P11142		0	2.15038e+07	0	0.00304		30.03	0.0098815	2	993.526	0.750061	29.0893	0
	High	QTQTFTTYSDNQPGVLIQVYEGER	2	1	1	P11142		0	16399798	0	2.757e-06		28.48	0.0219244	3	2774.32	-0.984192	50.9841	0
	High	TVTNAVVTVPAYFNDSQR	1	1	1	P11142		0	2.51133e+07	0	0.001453		17.56	0.278867	3	1982	1.28611	44.3045	0
	High	RFDDAVVQSDMK	3	1	1	P11142		0	3.39834e+07	0.001	0.006972		13.89	0.416486	3	1410.67	0.285672	27.0957	1
	High	NQVAmNPTNTVFDAK	1	1	1	P11142	M5(Oxidation)	0	1.07559e+07	0.001	0.01755		12.61	0.688088	2	1665.79	-2.61864	29.3276	0
	High	MVNHFIAEFK	2	1	1	P11142		0	1.699e+07	0.003	0.04911		13.62	0.538793	2	1235.63	1.57405	37.8342	0
P04264	Keratin, type II cytoskeletal 1 OS=Homo sapiens OX=9606 GN=KRT1 PE=1 SV=6 - [K2C1_HUMAN]	1160.78	45.19	1	20	24	59	8.02083e+07	644	65.999	8.11865	-
	A3	Sequence	# PSMs	# Proteins	# Protein Groups	Protein Group Accessions	Modifications	ΔCn	Area	q-Value	PEP		IonScore	Exp Value	Charge	MH+ [Da]	ΔM [ppm]	RT [min]	# Missed Cleavages
	High	SLDLDSIIAEVK	2	1	1	P04264		0	3.20657e+07	0	1.26e-09		87.29	3.07953e-08	2	1302.71	-0.792479	56.0424	0
	High	LNDLEDALQQAK	2	1	1	P04264		0	4.63719e+07	0	2.207e-07		84.34	5.00655e-08	2	1357.69	-0.63152	37.7588	0
	High	QISNLQQSISDAEQR	2	1	1	P04264		0	6.35308e+07	0	1.1e-08		74.83	4.75191e-07	2	1716.85	-0.816761	35.2582	0
	High	FSScGGGGGSFGAGGGFGSR	2	1	1	P04264	C4(Methylthio)	0	3.08777e+07	0	1.768e-09		69.72	2.45317e-07	2	1754.7	-0.263964	38.9255	0
	High	YEELQITAGR	4	2	1	P04264		0	2.66042e+07	0	8.305e-07		66.22	2.98476e-06	2	1179.6	-0.586857	30.3946	0
	High	GGGGGGYGSGGSSYGSGGGSYGSGGGGGGGR	2	1	1	P04264		0	4.46962e+06	0	1.823e-10		65.26	4.16992e-07	2	2383.95	-0.21296	22.3675	0
	High	SKAEAESLYQSK	2	1	1	P04264		0	5.59001e+06	0	1.412e-05		64.64	4.00245e-06	2	1340.67	-0.397212	19.4911	1
	High	TNAENEFVTIK	2	1	1	P04264		0	4.73411e+07	0	1.937e-06		59.35	1.55634e-05	2	1265.64	-0.00527007	32.7007	0
	High	FLEQQNQVLQTK	4	2	2	P35908;P04264		0	1.29676e+08	0	1.118e-07		56.65	3.40628e-05	2	1475.78	-0.327732	29.1505	0
	High	AEAESLYQSK	2	1	1	P04264		0	2.5462e+07	0	6.464e-06		50.39	7.49573e-05	2	1125.54	0.544607	21.0026	0
	High	NMQDMVEDYR	2	1	1	P04264		0	3.9419e+06	0	1.118e-05		44.26	7.31197e-05	2	1300.53	-1.03296	35.1085	0
	High	IEISELNR	1	2	2	P35908;P04264		0	2.45409e+07	0	0.0002123		41.28	0.000755903	2	973.531	-0.222701	29.7475	0
	High	THNLEPYFESFINNLR	6	1	1	P04264		0	14526755	0	8.736e-06		41.02	0.00137578	3	1993.98	0.126162	58.4048	0
	High	DVDGAYMTK	2	1	1	P04264		0	8.78367e+06	0	0.000484		37.79	0.000723585	2	999.446	0.383152	21.9137	0
	High	NmQDmVEDYR	2	1	1	P04264	M2(Oxidation); M5(Oxidation)	0	9.22691e+06	0	0.00179		37.15	0.000231303	2	1332.52	-0.0634299	21.0877	0
	High	NKYEDEINKR	3	5	4	P13647;P02538;P05787;P04264		0	2.70475e+07	0	0.001068		34.6	0.00454225	3	1308.65	-0.0705633	19.1982	2
	High	WELLQQVDTSTR	2	1	1	P04264		0	4.74176e+07	0	2.958e-05		30.99	0.0104297	2	1475.75	-0.904699	44.8355	0
	High	AQYEDIAQK	2	1	1	P04264		0	3.40755e+07	0	0.0004674		29.92	0.0101859	2	1065.52	0.357265	20.7962	0
	High	DYQELmNTK	2	1	1	P04264	M6(Oxidation)	0	5.33421e+06	0	0.00197		29.53	0.00702006	2	1157.52	0.715341	21.3447	0
	High	NMQDmVEDYR	4	1	1	P04264	M5(Oxidation)	0	2.04322e+07	0	0.0009614		28.89	0.00271156	2	1316.53	1.17305	27.9267	0
	High	SLNNQFASFIDK	2	1	1	P04264		0	2.79861e+07	0	0.001354		23.87	0.0516857	2	1383.69	-0.35728	46.5087	0
	High	SGGGFSSGSAGIINYQR	2	1	1	P04264		0	4.12534e+06	0	0.001101		23.78	0.0492082	2	1657.79	-1.35378	34.6755	0
	High	MSGEcAPNVSVSVSTSHTTISGGGSR	1	1	1	P04264	C5(Methylthio)	0	1.87709e+07	0	0.0005042		13.17	0.325315	3	2554.13	-0.266963	35.4392	0
	High	TLLEGEESR	2	1	1	P04264		0	4.72053e+07	0.001	0.01293		27.96	0.0233535	2	1033.52	1.73056	22.0994	0
	High	SLVNLGGSK	1	1	1	P04264		0	1.52454e+07	0.001	0.006794		19.33	0.165687	2	874.499	-0.333104	26.3385	0
	High	YEDEINKR	1	6	5	P13647;P35908;P02538;P05787;P04264		0	2.41184e+07	0.005	0.08144		24.43	0.0393031	2	1066.52	0.117946	17.2217	1
P10809	60 kDa heat shock protein, mitochondrial OS=Homo sapiens OX=9606 GN=HSPD1 PE=1 SV=2 - [CH60_HUMAN]	1130.11	55.15	1	22	22	54	7.55549e+07	573	61.0164	5.87158	0.00606265
	A3	Sequence	# PSMs	# Proteins	# Protein Groups	Protein Group Accessions	Modifications	ΔCn	Area	q-Value	PEP		IonScore	Exp Value	Charge	MH+ [Da]	ΔM [ppm]	RT [min]	# Missed Cleavages
	High	GVMLAVDAVIAELK	4	1	1	P10809		0	5.64178e+06	0	8.664e-10		111.64	6.95771e-11	2	1428.81	-0.429518	65.2126	0
	High	IQEIIEQLDVTTSEYEK	3	1	1	P10809		0	4.58921e+07	0	2.677e-10		74.14	5.97491e-07	2	2038.02	-0.109304	49.8313	0
	High	cEFQDAYVLLSEK	3	1	1	P10809	C1(Methylthio)	0	2.4058e+07	0	2.032e-09		66.54	1.74128e-06	2	1590.72	-0.281304	54.2139	0
	High	TLNDELEIIEGMK	2	1	1	P10809		0	5.39655e+07	0	5.943e-07		66.08	3.61275e-06	2	1504.76	-0.3418	52.7474	0
	High	VGLQVVAVK	2	1	1	P10809		0	1.99339e+07	0	1.431e-06		65.33	6.30142e-07	2	912.588	0.293625	30.8522	0
	High	IMQSSSEVGYDAMAGDFVNMVEK	3	1	1	P10809		0	7.94943e+06	0	3.238e-09		62.71	3.61663e-06	2	2508.11	-0.227711	56.2499	0
	High	LSDGVAVLK	2	1	1	P10809		0	3.33882e+07	0	5.229e-06		61.01	6.22114e-06	2	901.536	0.23156	27.5946	0
	High	ALmLQGVDLLADAVAVTMGPK	2	1	1	P10809	M3(Oxidation)	0	1.7512e+06	0	5.29e-09		60.46	1.22332e-05	3	2129.14	0.258174	64.8673	0
	High	VGEVIVTK	2	1	1	P10809		0	3.46625e+07	0	4.547e-05		58.47	1.05963e-05	2	844.514	-0.348007	21.0687	0
	High	ALMLQGVDLLADAVAVTMGPK	2	1	1	P10809		0	1.19281e+07	0	1.549e-08		57.45	2.68032e-05	2	2113.14	-0.349095	66.1038	0
	High	VTDALNATR	2	1	1	P10809		0	2.25403e+07	0	2.801e-05		51.99	0.000101502	2	960.507	-3.64229	19.5269	0
	High	AAVEEGIVLGGGcALLR	3	1	1	P10809	C13(Methylthio)	0	1.46972e+07	0	3.867e-06		50.75	0.000145982	2	1673.87	-0.611381	56.5825	0
	High	cIPALDSLTPANEDQK	1	1	1	P10809	C1(Methylthio)	0	8.18568e+07	0	1.161e-06		45.68	0.000306899	2	1760.82	-0.374323	43.8247	0
	High	VGGTSDVEVNEK	2	1	1	P10809		0	8.16438e+07	0	0.0002084		45.31	0.000247331	2	1233.59	-3.00965	18.7026	0
	High	ISSIQSIVPALEIANAHR	3	1	1	P10809		0	6.3164e+07	0	1.268e-05		41.34	0.000697788	2	1919.07	0.635647	51.6046	0
	High	NAGVEGSLIVEK	4	1	1	P10809		0	2.82863e+07	0	2.14e-05		37.5	0.00301418	2	1215.66	0.59861	30.0704	0
	High	TVIIEQSWGSPK	3	1	1	P10809		0	3.64924e+07	0	2.958e-05		32.39	0.00749796	2	1344.72	-0.169203	36.4156	0
	High	EIGNIISDAMK	2	1	1	P10809		0	2.9996e+07	0	0.001321		31.27	0.0114953	2	1190.61	0.570488	43.0131	0
	High	TALLDAAGVASLLTTAEVVVTEIPK	2	1	1	P10809		0	2.72269e+06	0	1.285e-05		21.97	0.0362139	2	2482.4	0.326316	68.0979	0
	High	KPLVIIAEDVDGEALSTLVLNR	2	1	1	P10809		0	1.7968e+06	0	3.783e-06		20.24	0.067656	3	2365.33	-0.0498655	63.0719	0
	High	TLNDELEIIEGmK	1	1	1	P10809	M12(Oxidation)	0	0	0	0.0001258		12.57	0.788524	2	1520.75	-0.606602	46.3047	0
	High	IPAMTIAK	1	1	1	P10809		0	3.48255e+07	0.001	0.005006		25.13	0.0560097	2	844.496	-0.722683	27.8056	0
	High	GANPVEIR	2	1	1	P10809		0	1.81612e+07	0.002	0.02559		20.33	0.0542195	2	855.469	1.10417	21.3487	0
	High	DPGMGAMGGMGGGMGGGMF	1	1	1	P10809		0	1.77734e+06	0.005	0.07726		10.23	0.0946172	2	1674.62	-1.6123	54.502	0
P07437	Tubulin beta chain OS=Homo sapiens OX=9606 GN=TUBB PE=1 SV=2 - [TBB5_HUMAN]	1058.29	52.93	1	4	17	59	1.28752e+08	444	49.639	4.89404	0.006624
	A3	Sequence	# PSMs	# Proteins	# Protein Groups	Protein Group Accessions	Modifications	ΔCn	Area	q-Value	PEP		IonScore	Exp Value	Charge	MH+ [Da]	ΔM [ppm]	RT [min]	# Missed Cleavages
	High	GHYTEGAELVDSVLDVVR	7	2	2	P68371;P07437		0	8.44466e+07	0	2.646e-12		76.46	3.45694e-07	2	1958.98	-0.0736342	62.8963	0
	High	EVDEQMLNVQNK	4	2	2	P68371;P07437		0	2.08701e+08	0	4.456e-07		66.05	2.20999e-06	2	1446.69	-1.10567	28.1194	0
	High	ISEQFTAMFR	4	3	3	P68371;P04350;P07437		0	6.10874e+07	0	2.532e-06		61.1	7.56841e-06	2	1229.6	0.0447062	46.76	0
	High	MAVTFIGNSTAIQELFK	2	1	1	P07437		0	1.11001e+07	0	1.791e-08		58.24	2.11456e-05	2	1869.98	0.110008	59.6326	0
	High	IMNTFSVVPSPK	2	3	3	P68371;P04350;P07437		0	4.53415e+07	0	5.424e-06		56.69	3.19291e-05	2	1319.7	-0.219029	39.379	0
	High	ISVYYNEATGGK	2	1	1	P07437		0	6.67058e+07	0	3.276e-06		49.09	0.00012516	2	1301.64	-0.0835412	28.2493	0
	High	TAVcDIPPR	8	3	3	P68371;P04350;P07437	C4(Methylthio)	0	1.25584e+07	0	0.0002533		49.05	8.2138e-05	2	1017.49	-0.248789	32.9519	0
	High	EVDEQmLNVQNK	2	2	2	P68371;P07437	M6(Oxidation)	0	10646772	0	4.135e-06		48.47	0.000120187	2	1462.68	-0.0373284	21.7349	0
	High	SGPFGQIFRPDNFVFGQSGAGNNWAK	2	3	3	P68371;P04350;P07437		0	3.71674e+07	0	3.459e-09		44.22	0.000548742	3	2798.34	-1.16754	56.5502	0
	High	LTTPTYGDLNHLVSATMSGVTTcLR	4	3	3	P68371;P04350;P07437	C23(Methylthio)	0	2.03793e+07	0	1.19e-07		43.12	0.000809297	2	2697.3	-0.12067	64.4894	0
	High	YLTVAAVFR	2	3	3	P68371;P04350;P07437		0	1.87916e+07	0	0.0003986		41.15	0.00054099	2	1039.6	2.25231	47.1584	0
	High	FPGQLNADLR	4	3	3	P68371;P04350;P07437		0	1.94983e+07	0	0.0005397		35.13	0.00420456	2	1130.59	-1.04148	35.2017	0
	High	AILVDLEPGTMDSVR	2	1	1	P07437		0	6.23991e+07	0	2.294e-05		31.23	0.0116393	2	1615.83	-1.72156	47.3315	0
	High	NMMAAcDPR	4	3	3	P68371;P04350;P07437	C6(Methylthio)	0	2.89756e+07	0	0.0001657		30.78	0.000833624	2	1054.39	-0.267532	35.2899	0
	High	NSSYFVEWIPNNVK	2	3	3	P68371;P04350;P07437		0	93108242	0	0.0003557		29.59	0.0157707	2	1696.83	-2.48602	53.2204	0
	High	LHFFMPGFAPLTSR	5	3	3	P68371;P04350;P07437		0	1.20069e+07	0	1.831e-05		25.01	0.0577366	3	1620.84	-0.0789278	63.0867	0
	High	ALTVPELTQQVFDAK	2	1	1	P07437		0	5.76626e+07	0	0.0006225		18.75	0.182026	2	1659.89	-1.97358	52.8768	0
	High	IREEYPDR	1	2	2	P68371;P07437		0	8.04904e+07	0.009	0.1406		22.35	0.073345	2	1077.53	-1.24158	18.2093	1
P06733	Alpha-enolase OS=Homo sapiens OX=9606 GN=ENO1 PE=1 SV=2 - [ENOA_HUMAN]	1007.15	56.68	1	17	17	63	1.76554e+08	434	47.1393	7.38623	0.00707309
	A3	Sequence	# PSMs	# Proteins	# Protein Groups	Protein Group Accessions	Modifications	ΔCn	Area	q-Value	PEP		IonScore	Exp Value	Charge	MH+ [Da]	ΔM [ppm]	RT [min]	# Missed Cleavages
	High	VVIGMDVAASEFFR	4	1	1	P06733		0	26919725	0	1.186e-08		76.76	3.06805e-07	2	1540.78	0.372255	60.5717	0
	High	AAVPSGASTGIYEALELR	5	2	1	P06733		0	2.43603e+08	0	4.247e-09		73.99	6.3445e-07	2	1804.94	-0.960119	50.3759	0
	High	DATNVGDEGGFAPNILENK	2	1	1	P06733		0	5.87089e+07	0	3.676e-09		59.57	1.18136e-05	2	1960.92	-0.39956	42.8984	0
	High	SGETEDTFIADLVVGLcTGQIK	4	2	1	P06733	C17(Methylthio)	0	5.90924e+06	0	3.605e-08		57.53	2.79034e-05	2	2342.12	-0.836653	66.9658	0
	High	LAQANGWGVMVSHR	3	1	1	P06733		0	2.27455e+07	0	3.198e-06		44.93	0.000404921	2	1525.77	-1.03129	34.9209	0
	High	ScNcLLLK	2	1	1	P06733	C2(Methylthio); C4(Methylthio)	0	2.026e+07	0	5.406e-05		43.41	0.000161893	2	985.433	-0.53597	50.1433	0
	High	FTASAGIQVVGDDLTVTNPK	8	1	1	P06733		0	8.21633e+07	0	6.598e-08		43.05	0.000817493	2	2033.05	-0.82092	47.6728	0
	High	LMIEMDGTENK	5	1	1	P06733		0	6.80411e+07	0	2.935e-06		40.48	0.000595418	2	1280.58	-3.87085	32.3473	0
	High	GNPTVEVDLFTSK	2	1	1	P06733		0	1.05237e+08	0	0.0001946		39.8	0.00156022	2	1406.72	0.855556	42.4225	0
	High	LNVTEQEK	2	1	1	P06733		0	2.23012e+07	0	0.0001056		39.52	0.00141283	2	960.499	-0.328046	18.0998	0
	High	LMIEmDGTENK	4	1	1	P06733	M5(Oxidation)	0	1.45894e+07	0	0.0007862		35.63	0.00175057	2	1296.58	-1.50175	23.0179	0
	High	LAMQEFMILPVGAANFR	4	1	1	P06733		0	1.58472e+07	0	1.354e-05		35.41	0.00469016	2	1907.99	-0.0813552	62.7144	0
	High	IEEELGSK	2	1	1	P06733		0	4.35638e+07	0	0.00112		33.4	0.00543935	2	904.462	0.0171782	18.812	0
	High	HIADLAGNSEVILPVPAFNVINGGSHAGNK	4	1	1	P06733		0	9.44126e+07	0	7.073e-07		33.23	0.00838967	3	3011.57	-0.618941	53.0555	0
	High	KLNVTEQEK	2	1	1	P06733		0	1.43378e+07	0	0.002701		32.87	0.0069458	2	1088.59	-0.232731	16.5751	1
	High	IGAEVYHNLK	2	1	1	P06733		0	1.0105e+08	0	0.0004297		30.92	0.0114083	2	1143.62	0.363029	23.5759	0
	High	VVIGmDVAASEFFR	2	1	1	P06733	M5(Oxidation)	0	6.63251e+06	0	4.924e-06		29.61	0.0155889	2	1556.78	-0.207403	49.3138	0
	High	DYPVVSIEDPFDQDDWGAWQK	2	1	1	P06733		0	2.0596e+07	0	5.259e-05		26.57	0.0152002	2	2510.11	-0.185605	59.2889	0
	High	YISPDQLADLYK	4	1	1	P06733		0	180823647	0	0.003295		22.7	0.0690086	2	1425.73	0.641785	47.2277	0
P68371	Tubulin beta-4B chain OS=Homo sapiens OX=9606 GN=TUBB4B PE=1 SV=1 - [TBB4B_HUMAN]	992.105	48.99	1	1	16	60	1.38849e+08	445	49.799	4.89404	0.00673627
	A3	Sequence	# PSMs	# Proteins	# Protein Groups	Protein Group Accessions	Modifications	ΔCn	Area	q-Value	PEP		IonScore	Exp Value	Charge	MH+ [Da]	ΔM [ppm]	RT [min]	# Missed Cleavages
	High	GHYTEGAELVDSVLDVVR	7	2	2	P68371;P07437		0	8.44466e+07	0	2.646e-12		76.46	3.45694e-07	2	1958.98	-0.0736342	62.8963	0
	High	EVDEQMLNVQNK	4	2	2	P68371;P07437		0	2.08701e+08	0	4.456e-07		66.05	2.20999e-06	2	1446.69	-1.10567	28.1194	0
	High	ISEQFTAMFR	4	3	3	P68371;P04350;P07437		0	6.10874e+07	0	2.532e-06		61.1	7.56841e-06	2	1229.6	0.0447062	46.76	0
	High	IMNTFSVVPSPK	2	3	3	P68371;P04350;P07437		0	4.53415e+07	0	5.424e-06		56.69	3.19291e-05	2	1319.7	-0.219029	39.379	0
	High	AVLVDLEPGTMDSVR	2	2	2	P68371;P04350		0	1.14736e+08	0	7.81e-06		49.74	0.000144921	2	1601.81	-9.49424	44.6528	0
	High	TAVcDIPPR	8	3	3	P68371;P04350;P07437	C4(Methylthio)	0	1.25584e+07	0	0.0002533		49.05	8.2138e-05	2	1017.49	-0.248789	32.9519	0
	High	EVDEQmLNVQNK	2	2	2	P68371;P07437	M6(Oxidation)	0	10646772	0	4.135e-06		48.47	0.000120187	2	1462.68	-0.0373284	21.7349	0
	High	SGPFGQIFRPDNFVFGQSGAGNNWAK	2	3	3	P68371;P04350;P07437		0	3.71674e+07	0	3.459e-09		44.22	0.000548742	3	2798.34	-1.16754	56.5502	0
	High	LTTPTYGDLNHLVSATMSGVTTcLR	4	3	3	P68371;P04350;P07437	C23(Methylthio)	0	2.03793e+07	0	1.19e-07		43.12	0.000809297	2	2697.3	-0.12067	64.4894	0
	High	YLTVAAVFR	2	3	3	P68371;P04350;P07437		0	1.87916e+07	0	0.0003986		41.15	0.00054099	2	1039.6	2.25231	47.1584	0
	High	FPGQLNADLR	4	3	3	P68371;P04350;P07437		0	1.94983e+07	0	0.0005397		35.13	0.00420456	2	1130.59	-1.04148	35.2017	0
	High	ALTVPELTQQMFDAK	3	2	2	P68371;P04350		0	6.73521e+07	0	6.358e-05		32.54	0.00824635	2	1691.87	-0.152655	53.5981	0
	High	NMMAAcDPR	4	3	3	P68371;P04350;P07437	C6(Methylthio)	0	2.89756e+07	0	0.0001657		30.78	0.000833624	2	1054.39	-0.267532	35.2899	0
	High	NSSYFVEWIPNNVK	2	3	3	P68371;P04350;P07437		0	93108242	0	0.0003557		29.59	0.0157707	2	1696.83	-2.48602	53.2204	0
	High	INVYYNEATGGK	2	1	1	P68371		0	8.91097e+07	0	0.0001292		28.26	0.0169432	2	1328.65	-1.21125	28.5282	0
	High	AVLVDLEPGTmDSVR	2	2	2	P68371;P04350	M11(Oxidation)	0	5.63279e+06	0	7.424e-05		25.92	0.0350526	2	1617.81	-1.1263	38.7979	0
	High	LHFFMPGFAPLTSR	5	3	3	P68371;P04350;P07437		0	1.20069e+07	0	1.831e-05		25.01	0.0577366	3	1620.84	-0.0789278	63.0867	0
	High	IREEYPDR	1	2	2	P68371;P07437		0	8.04904e+07	0.009	0.1406		22.35	0.073345	2	1077.53	-1.24158	18.2093	1
P08670	Vimentin OS=Homo sapiens OX=9606 GN=VIM PE=1 SV=4 - [VIME_HUMAN]	960.769	54.94	1	22	25	58	7.46511e+07	466	53.6191	5.12256	0.00651173
	A3	Sequence	# PSMs	# Proteins	# Protein Groups	Protein Group Accessions	Modifications	ΔCn	Area	q-Value	PEP		IonScore	Exp Value	Charge	MH+ [Da]	ΔM [ppm]	RT [min]	# Missed Cleavages
	High	LLQDSVDFSLADAINTEFK	6	1	1	P08670		0	1.81068e+07	0	7.056e-11		66.92	2.98756e-06	2	2126.07	0.317143	58.5815	0
	High	FADLSEAANR	2	1	1	P08670		0	4.80853e+07	0	2.233e-07		65.27	3.72944e-06	2	1093.53	0.175687	25.8932	0
	High	QVQSLTcEVDALK	2	1	1	P08670	C7(Methylthio)	0	4.61856e+07	0	4.633e-07		57.45	2.43747e-05	2	1479.72	2.27267	44.1803	0
	High	VELQELNDR	2	1	1	P08670		0	75027479	0	1.08e-05		54.63	2.89254e-05	2	1115.57	-0.146987	27.4222	0
	High	ILLAELEQLK	4	1	1	P08670		0	7.62107e+07	0	4.696e-06		53.16	2.41529e-05	2	1169.71	-0.125256	51.1035	0
	High	VESLQEEIAFLK	2	1	1	P08670		0	2.76392e+07	0	1.856e-07		51.33	9.90199e-05	2	1405.76	0.159813	51.8404	0
	High	LGDLYEEEMR	2	1	1	P08670		0	4.2668e+07	0	3.105e-05		50.58	6.25613e-05	2	1254.57	0.522349	33.7801	0
	High	QDVDNASLAR	2	1	1	P08670		0	6.4252e+07	0	5.028e-05		47.63	0.000149285	2	1088.53	-0.00243131	19.0422	0
	High	EEAENTLQSFR	2	1	1	P08670		0	6.57091e+07	0	8.132e-06		45.58	0.00026701	2	1323.62	0.284237	29.9941	0
	High	LQEEMLQR	2	1	1	P08670		0	5.12353e+07	0	9.631e-05		43.92	0.000691392	2	1046.53	1.27688	24.4445	0
	High	KLLEGEESR	2	3	3	P08670;P05787;P08729		0	1.61938e+07	0	2.238e-05		43.56	0.000691671	2	1060.56	1.06493	17.7673	1
	High	RQVDQLTNDK	1	1	1	P08670		0	5.68814e+06	0	0.0003172		42.7	0.000810918	2	1216.63	-0.695723	17.1733	1
	High	EMEENFAVEAANYQDTIGR	2	1	1	P08670		0	4.58518e+07	0	1.172e-07		41.63	0.000539349	2	2186.96	-0.837862	45.9867	0
	High	LLEGEESR	2	3	3	P08670;P05787;P08729		0	5.00217e+07	0	0.0003165		39.33	0.00130099	2	932.469	0.490455	18.4886	0
	High	DNLAEDIMR	2	1	1	P08670		0	1.39221e+07	0	0.0003379		33.75	0.00267777	2	1076.5	0.496952	39.7804	0
	High	ETNLDSLPLVDTHSK	2	1	1	P08670		0	1.95254e+07	0	0.0002298		33.19	0.00681221	2	1668.84	0.115355	36.7725	0
	High	NLQEAEEWYK	2	1	1	P08670		0	2.48763e+07	0	3.832e-05		33.01	0.00420029	2	1309.6	-1.26424	37.6272	0
	High	EYQDLLNVK	2	1	1	P08670		0	3.22855e+07	0	0.001322		32.62	0.00686505	2	1121.58	-1.16464	35.9507	0
	High	LGDLYEEEmR	2	1	1	P08670	M9(Oxidation)	0	4.47627e+06	0	0.001007		30.07	0.00551046	2	1270.56	-2.39953	27.7878	0
	High	DGQVINETSQHHDDLE	3	1	1	P08670		0	2.48591e+07	0	7.566e-05		29.72	0.00677289	2	1836.8	-0.0965239	22.8321	0
	High	KVESLQEEIAFLK	1	1	1	P08670		0	4.6009e+06	0	0.0004929		29.71	0.0133097	3	1533.85	-1.63259	47.3713	1
	High	LQDEIQNMK	2	1	1	P08670		0	7.2715e+07	0	0.003036		28.58	0.015393	2	1118.55	-0.4529	24.3932	0
	High	FLEQQNK	1	6	5	P08670;P13647;P02538;P05787;P08729		0	813696	0	0.003012		20.46	0.134925	2	906.468	-0.322498	18.1858	0
	High	SLYASSPGGVYATR	2	1	1	P08670		0	1.46218e+07	0	0.0003655		20.03	0.109243	2	1428.71	0.105243	29.9069	0
	High	EmEENFAVEAANYQDTIGR	1	1	1	P08670	M2(Oxidation)	0	3.88182e+06	0	0.0009626		18.52	0.108969	2	2202.96	0.811536	43.2209	0
	High	QQYESVAAK	2	1	1	P08670		0	1.49242e+07	0.001	0.01053		26.07	0.0234814	2	1023.51	0.203697	17.8751	0
	High	LQEEmLQR	1	1	1	P08670	M5(Oxidation)	0	2.7827e+06	0.001	0.005354		22.59	0.0707788	2	1062.53	0.184196	19.6739	0
	High	FANYIDK	2	1	1	P08670		0	1.95043e+07	0.001	0.01042		17.58	0.107368	2	870.436	0.880743	25.9523	0
P55072	Transitional endoplasmic reticulum ATPase OS=Homo sapiens OX=9606 GN=VCP PE=1 SV=4 - [TERA_HUMAN]	938.475	44.04	1	25	25	53	2.47903e+07	806	89.2657	5.26221	0.00595038
	A3	Sequence	# PSMs	# Proteins	# Protein Groups	Protein Group Accessions	Modifications	ΔCn	Area	q-Value	PEP		IonScore	Exp Value	Charge	MH+ [Da]	ΔM [ppm]	RT [min]	# Missed Cleavages
	High	MTNGFSGADLTEIcQR	2	1	1	P55072	C14(Methylthio)	0	9.51831e+06	0	9.286e-09		77.53	7.68226e-08	2	1788.77	-0.0181111	52.7637	0
	High	EDEEESLNEVGYDDIGGcR	2	1	1	P55072	C18(Methylthio)	0	1.35697e+07	0	1.032e-10		67.2	2.66765e-07	2	2174.85	-0.583237	43.8008	0
	High	NAPAIIFIDELDAIAPK	6	1	1	P55072		0	1.08415e+07	0	1.408e-07		63.65	4.63883e-06	2	1810.99	-0.398127	62.6815	0
	High	WALSQSNPSALR	2	1	1	P55072		0	2.49663e+07	0	7.936e-05		56.11	3.29399e-05	2	1329.68	-6.47572	36.0169	0
	High	IVSQLLTLMDGLK	2	1	1	P55072		0	2276826	0	8.108e-07		52.8	4.85447e-05	2	1430.83	-0.261779	59.9936	0
	High	AVANETGAFFFLINGPEIMSK	2	1	1	P55072		0	2.48121e+06	0	1.07e-06		51.18	0.000126505	2	2256.14	-0.879351	61.7438	0
	High	LDQLIYIPLPDEK	2	1	1	P55072		0	1.12384e+07	0	1.367e-05		47.37	0.000238201	2	1556.86	0.314893	53.9828	0
	High	MDELQLFR	2	1	1	P55072		0	6.94895e+06	0	2.386e-05		45.65	0.00027227	2	1051.52	-2.83926	45.3764	0
	High	GDDLSTAILK	2	1	1	P55072		0	5.44135e+06	0	0.0002742		42.2	0.000967108	2	1032.56	-0.989154	33.9655	0
	High	LAGESESNLR	2	1	1	P55072		0	1.06568e+07	0	6.141e-05		42.05	0.000676752	2	1075.54	-0.10597	19.4734	0
	High	VINQILTEMDGMSTK	2	1	1	P55072		0	2.65602e+07	0	5.832e-06		41.09	0.0010309	2	1679.83	-1.35874	49.0553	0
	High	EVDIGIPDATGR	2	1	1	P55072		0	9.94426e+06	0	0.0001105		38.89	0.00139452	2	1242.63	-1.89658	35.2226	0
	High	LIVDEAINEDNSVVSLSQPK	4	1	1	P55072		0	2.08145e+07	0	3.304e-06		38.69	0.00217008	2	2170.12	-1.59548	45.4822	0
	High	ELQELVQYPVEHPDK	2	1	1	P55072		0	1.28614e+07	0	9.796e-06		37.79	0.00249512	2	1823.92	-0.70508	36.3057	0
	High	LGDVISIQPcPDVK	2	1	1	P55072	C10(Methylthio)	0	2.28445e+07	0	7.934e-06		34.25	0.00524293	2	1529.77	-0.466378	48.7575	0
	High	QTNPSAMEVEEDDPVPEIR	2	1	1	P55072		0	1.1203e+07	0	6.728e-06		33.95	0.00354391	2	2155.98	-0.826313	40.7638	0
	High	QAAPcVLFFDELDSIAK	2	1	1	P55072	C5(Methylthio)	0	481453	0	8.545e-07		32.84	0.00631795	2	1912.92	-0.089816	65.8861	0
	High	ETVVEVPQVTWEDIGGLEDVK	2	1	1	P55072		0	5.21733e+06	0	1.723e-05		32.7	0.00805548	2	2342.17	-1.4611	57.2226	0
	High	EAVcIVLSDDTcSDEK	2	1	1	P55072	C4(Methylthio); C12(Methylthio)	0	7.18921e+06	0	8.254e-06		30.05	0.00168054	2	1818.72	-1.02617	50.7354	0
	High	GVLFYGPPGcGK	2	1	1	P55072	C10(Methylthio)	0	7.90791e+06	0	0.002741		28.63	0.0105558	2	1240.58	-0.490014	46.2809	0
	High	LEILQIHTK	1	1	1	P55072		0	2.19975e+06	0	0.0006504		28.22	0.00587577	2	1094.66	-0.403443	33.7452	0
	High	DVDLEFLAK	2	1	1	P55072		0	2.6224e+06	0	0.0005666		24.26	0.0431219	2	1049.55	0.0265831	46.3528	0
	High	GILLYGPPGTGK	2	1	1	P55072		0	830655	0	0.001506		22.77	0.0639419	2	1172.67	-0.966972	38.4504	0
	High	GPELLTmWFGESEANVR	1	1	1	P55072	M7(Oxidation)	0	8.25367e+06	0	0.0006097		16.15	0.296046	2	1951.92	-1.32545	58.776	0
	High	DHFEEAMR	1	1	1	P55072		0	3.61172e+06	0.002	0.0281		16.09	0.0824223	2	1034.44	-0.215273	20.972	0
P04083	Annexin A1 OS=Homo sapiens OX=9606 GN=ANXA1 PE=1 SV=2 - [ANXA1_HUMAN]	929.406	56.07	1	15	15	44	1.09794e+08	346	38.69	7.02002	0.00493993
	A3	Sequence	# PSMs	# Proteins	# Protein Groups	Protein Group Accessions	Modifications	ΔCn	Area	q-Value	PEP		IonScore	Exp Value	Charge	MH+ [Da]	ΔM [ppm]	RT [min]	# Missed Cleavages
	High	MYGISLcQAILDETK	4	1	1	P04083	C7(Methylthio)	0	1.21111e+07	0	4.717e-12		86.58	2.49457e-08	2	1730.82	0.116447	64.6919	0
	High	GVDEATIIDILTK	4	1	1	P04083		0	4.73409e+07	0	5.327e-09		83.67	5.90613e-08	2	1387.76	-2.35289	57.274	0
	High	SEDFGVNEDLADSDAR	4	1	1	P04083		0	6.73683e+07	0	1.212e-10		81.99	3.16206e-08	2	1739.73	-1.50227	34.3487	0
	High	QAWFIENEEQEYVQTVK	2	1	1	P04083		0	1.78781e+07	0	2.818e-08		70.99	1.0987e-06	2	2141.02	-0.364983	50.9352	0
	High	ALTGHLEEVVLALLK	2	1	1	P04083		0	1.65432e+06	0	5.45e-10		70.34	2.86656e-07	2	1605.96	-0.263053	65.5399	0
	High	GTDVNVFNTILTTR	2	1	1	P04083		0	8.83691e+07	0	6.372e-08		67.59	2.604e-06	2	1550.82	-0.191576	52.6242	0
	High	GLGTDEDTLIEILASR	4	1	1	P04083		0	7.4754e+06	0	9.889e-08		66.24	3.82671e-06	2	1702.89	0.244742	61.9619	0
	High	DITSDTSGDFR	4	1	1	P04083		0	3.30243e+07	0	2.38e-05		54.69	2.03775e-05	2	1213.53	0.753103	26.57	0
	High	TPAQFDADELR	4	1	1	P04083		0	7.28473e+07	0	1.615e-06		50.16	8.91542e-05	2	1262.6	0.694661	31.1692	0
	High	ALYEAGER	2	1	1	P04083		0	2.57239e+07	0	0.0001244		36.31	0.00235053	2	908.447	-0.54752	20.6019	0
	High	aMVSEFLK	2	1	1	P04083	N-Term(Acetyl)	0	3.86156e+06	0	0.0003767		31.36	0.00749418	2	966.496	-0.219189	56.1733	0
	High	AAYLQETGKPLDETLK	2	1	1	P04083		0	1.53828e+07	0	2.936e-05		27.01	0.0312536	2	1776.94	-0.187796	33.5235	0
	High	AAYLQETGKPLDETLKK	4	1	1	P04083		0	1.93306e+07	0	0.0002895		19.66	0.116795	3	1905.03	-0.438169	29.1827	1
	High	GGPGSAVSPYPTFNPSSDVAALHK	2	1	1	P04083		0	1.68165e+08	0	6.439e-05		17.54	0.304822	2	2356.15	-0.877933	42.3747	0
	High	SEIDMNDIK	2	1	1	P04083		0	3.8331e+07	0.001	0.01021		25.99	0.0234144	2	1064.49	0.855536	28.1473	0
P21333	Filamin-A OS=Homo sapiens OX=9606 GN=FLNA PE=1 SV=4 - [FLNA_HUMAN]	898.805	22.82	1	37	42	71	1.52867e+07	2647	280.564	6.06201	0.00797126
	A3	Sequence	# PSMs	# Proteins	# Protein Groups	Protein Group Accessions	Modifications	ΔCn	Area	q-Value	PEP		IonScore	Exp Value	Charge	MH+ [Da]	ΔM [ppm]	RT [min]	# Missed Cleavages
	High	cAPGVVGPAEADIDFDIIR	2	1	1	P21333	C1(Methylthio)	0	4.96757e+06	0	2.847e-08		56.11	3.08582e-05	2	2003.96	-0.629972	55.3868	0
	High	DAGEGGLSLAIEGPSK	2	1	1	P21333		0	5.3292e+06	0	2.126e-06		54.45	5.02491e-05	2	1500.75	0.457797	38.0558	0
	High	VTAQGPGLEPSGNIANK	2	1	1	P21333		0	1.4054e+07	0	1.847e-05		50.91	0.000135836	2	1652.86	-0.833091	25.5562	0
	High	VANPSGNLTETYVQDR	2	1	1	P21333		0	1.32863e+07	0	0.0003833		49.72	0.000146124	2	1763.85	-1.61939	31.5185	0
	High	VHGPGIQSGTTNKPNK	2	1	1	P21333		0	1.80927e+06	0	5.053e-06		48.96	0.000208374	2	1634.86	-0.343845	16.0404	0
	High	LIALLEVLSQK	2	2	2	P21333;O75369		0	5.59959e+06	0	1.752e-05		46.29	7.28386e-05	2	1226.77	0.0888144	58.9722	0
	High	QMQLENVSVALEFLDR	2	2	2	P21333;O75369		0	2.64531e+06	0	4.492e-07		45.82	0.000434618	2	1891.96	0.246587	59.9265	0
	High	VAQPTITDNK	1	1	1	P21333		0	6.5134e+06	0	0.0007234		44.87	0.000356791	2	1086.58	-0.996562	18.9979	0
	High	DAGEGLLAVQITDPEGKPK	1	1	1	P21333		0	5.00451e+06	0	1.793e-06		44.05	0.000596228	2	1938.02	-1.4329	41.2435	0
	High	ASGPGLNTTGVPASLPVEFTIDAK	2	1	1	P21333		0	4.22146e+06	0	2.155e-06		43.81	0.000657139	2	2342.22	-1.15373	53.2511	0
	High	AFGPGLQGGSAGSPAR	2	1	1	P21333		0	1.82634e+07	0	1.093e-06		43.4	0.00064678	2	1429.72	-0.10775	26.7367	0
	High	IANLQTDLSDGLR	2	1	1	P21333		0	1.01718e+07	0	4.989e-05		40.82	0.00109288	2	1415.74	-3.79548	40.6877	0
	High	LDVQFSGLTK	2	1	1	P21333		0	3.15273e+06	0	8.616e-05		38.21	0.00154028	2	1107.6	-0.295886	39.0036	0
	High	TGVAVNKPAEFTVDAK	3	1	1	P21333		0	5.94853e+06	0	1.955e-05		37.73	0.00274065	2	1646.88	0.237079	29.1202	0
	High	AWGPGLEGGVVGK	2	1	1	P21333		0	6.0593e+06	0	1.653e-05		37.58	0.00181566	2	1226.65	-1.5936	37.24	0
	High	VQVQDNEGcPVEALVK	2	1	1	P21333	C9(Methylthio)	0	1.35426e+07	0	3.839e-06		34.88	0.00377101	2	1773.85	-1.14197	45.9442	0
	High	YTPVQQGPVGVNVTYGGDPIPK	2	1	1	P21333		0	7.45157e+06	0	2.411e-05		31.97	0.0100065	2	2286.17	-0.747543	42.0366	0
	High	AGQSAAGAAPGGGVDTR	2	1	1	P21333		0	2.96162e+06	0	0.0001704		31.55	0.00731335	2	1442.7	-1.55873	18.0118	0
	High	SPFSVAVSPSLDLSK	1	1	1	P21333		0	5.60627e+06	0	5.657e-05		31.44	0.0114129	2	1533.81	-1.27712	46.8123	0
	High	TPcEEILVK	1	1	1	P21333	C3(Methylthio)	0	5.86629e+06	0	0.001603		30.17	0.0130779	2	1077.53	-0.249172	41.008	0
	High	VPVHDVTDASK	2	1	1	P21333		0	9.50718e+06	0	7.741e-05		30.16	0.0118551	2	1167.6	-0.18326	17.3291	0
	High	EATTEFSVDAR	2	1	1	P21333		0	4.23363e+06	0	0.0001604		29.55	0.00937253	2	1225.57	0.436253	26.9871	0
	High	GAGTGGLGLAVEGPSEAK	2	1	1	P21333		0	1.1022e+07	0	0.0004253		29.54	0.0143413	2	1570.81	-1.35599	32.8249	0
	High	LLGWIQNK	2	2	2	P21333;O75369		0	2.9432e+06	0	0.002856		29.4	0.013089	2	971.567	-0.704373	40.09	0
	High	EGPYSISVLYGDEEVPR	2	1	1	P21333		0	6.96676e+06	0	3.143e-06		28.39	0.0191962	2	1909.92	-1.13842	47.9509	0
	High	ATcAPQHGAPGPGPADASK	1	1	1	P21333	C3(Methylthio)	0	6.6742e+06	0	1.972e-05		27.15	0.0135891	3	1778.79	-0.140777	20.1586	0
	High	ALTQTGGPHVK	2	1	1	P21333		0	3.60619e+06	0	0.000832		26.87	0.019017	2	1108.61	-0.194773	17.1713	0
	High	SPYTVTVGQAcNPSAcR	2	1	1	P21333	C11(Methylthio); C16(Methylthio)	0	6.47283e+06	0	8.801e-05		24.01	0.0137031	2	1845.77	-0.0939213	46.2239	0
	High	YGGDEIPFSPYR	2	1	1	P21333		0	5.88623e+06	0	0.002124		22.6	0.0403913	2	1400.65	-0.197446	42.7296	0
	High	EAGAGGLAIAVEGPSK	2	1	1	P21333		0	6.61487e+06	0	0.0003368		20.51	0.102703	2	1426.75	0.241541	33.3804	0
	High	DGScGVAYVVQEPGDYEVSVK	2	1	1	P21333	C4(Methylthio)	0	3.16752e+06	0	0.0009562		18.4	0.111299	2	2246.99	-1.66091	47.6216	0
	High	VTYTPMAPGSYLISIK	2	1	1	P21333		0	7.7716e+06	0	0.0003173		18.06	0.204772	2	1740.92	0.203786	52.3382	0
	High	IVGPSGAAVPcK	1	1	1	P21333	C11(Methylthio)	0	2.24478e+06	0	0.00215		16.84	0.275329	2	1144.59	0.526652	31.4295	0
	High	cSGPGLSPGMVR	1	1	1	P21333	C1(Methylthio)	0	3.4058e+06	0	0.0002497		15.44	0.157167	2	1206.54	-2.51113	31.6528	0
	High	KGEITGEVR	1	1	1	P21333		0	638859	0.001	0.005495		38.52	0.00199659	2	988.543	0.413576	17.1325	1
	High	DLAEDAPWK	2	2	2	P21333;O75369		0	3.14182e+06	0.001	0.004607		25.44	0.0202889	2	1044.5	-0.262377	36.2733	0
	High	AEAGVPAEFSIWTR	1	1	1	P21333		0	5.28139e+06	0.001	0.01878		24.14	0.057629	2	1533.77	-0.398191	51.7902	0
	High	VEPGLGADNSVVR	1	1	1	P21333		0	1.15046e+07	0.001	0.01531		22.78	0.0693307	2	1312.68	-0.586011	26.862	0
	High	IQQNTFTR	1	2	2	P21333;O75369		0	2.66995e+06	0.003	0.041		13.28	0.535679	2	1007.53	-0.906934	20.1112	0
	High	FNEEHIPDSPFVVPVASPSGDAR	1	1	1	P21333		0	8.22635e+06	0.006	0.0892		10.6	1.2629	3	2467.19	-1.29182	48.1067	0
	High	AGVAPLQVK	1	1	1	P21333		0	4.16116e+06	0.007	0.1207		18.87	0.0259436	2	882.542	1.84093	24.5372	0
	High	MScMDNK	1	1	1	P21333	C3(Methylthio)	0	1.01859e+06	0.007	0.1168		18.82	0.0130909	2	874.294	1.13738	22.1931	0
P13647	Keratin, type II cytoskeletal 5 OS=Homo sapiens OX=9606 GN=KRT5 PE=1 SV=3 - [K2C5_HUMAN]	883.673	42.37	1	15	24	48	3.80966e+07	590	62.34	7.73779	-
	A3	Sequence	# PSMs	# Proteins	# Protein Groups	Protein Group Accessions	Modifications	ΔCn	Area	q-Value	PEP		IonScore	Exp Value	Charge	MH+ [Da]	ΔM [ppm]	RT [min]	# Missed Cleavages
	High	VDALMDEINFMK	2	1	1	P13647		0	1.40436e+07	0	2.177e-08		84.3	4.04973e-08	2	1425.67	-0.942365	53.1235	0
	High	QcANLQNAIADAEQR	2	1	1	P13647	C2(Methylthio)	0	3.08854e+07	0	6.785e-11		80.54	5.74002e-08	2	1690.76	-0.243149	43.306	0
	High	YEELQQTAGR	2	1	1	P13647		0	3.8265e+07	0	3.219e-06		64.75	4.06983e-06	2	1194.57	-0.18975	20.4671	0
	High	ISISTSGGSFR	2	1	1	P13647		0	1.16414e+07	0	2.199e-06		62.21	6.43256e-06	2	1111.58	0.992899	30.0539	0
	High	LAELEEALQK	2	1	1	P13647		0	1.78278e+07	0	1.559e-05		54.46	4.11811e-05	2	1143.62	-1.05284	34.2275	0
	High	SFSTASAITPSVSR	2	1	1	P13647		0	5.73704e+06	0	1.408e-05		51.11	0.00011462	2	1410.72	-0.470691	30.8195	0
	High	NLDLDSIIAEVK	2	4	3	P13647;P35908;P02538		0	3.20585e+07	0	4.133e-06		49.52	0.000168088	2	1329.72	-0.895062	55.9837	0
	High	AQYEEIANR	2	1	1	P13647		0	4.26739e+07	0	4.444e-05		48.15	0.000199041	2	1093.53	2.64983	21.7118	0
	High	EYQELMNTK	2	1	1	P13647		0	2.11025e+07	0	0.0009995		45.56	0.000183461	2	1155.53	-0.536438	25.6169	0
	High	GLGVGFGSGGGSSSSVK	2	1	1	P13647		0	2.08513e+07	0	8.062e-07		44.81	0.00042948	2	1439.71	-1.19348	29.7209	0
	High	SLYNLGGSK	2	1	1	P13647		0	8.72359e+06	0	0.0003636		42.68	0.000388448	2	938.494	0.051102	27.443	0
	High	VSLAGAcGVGGYGSR	2	1	1	P13647	C7(Methylthio)	0	6.98074e+06	0	7.124e-07		40.84	0.000593379	2	1399.65	0.120975	41.6721	0
	High	NMQDLVEDFK	2	1	1	P13647		0	1.09398e+07	0	6.488e-06		38.56	0.00120508	2	1238.57	0.164701	45.8509	0
	High	WTLLQEQGTK	2	3	2	P13647;P02538		0	2.93501e+07	0	0.000934		37.58	0.00255763	2	1203.63	-8.59806	36.6408	0
	High	TEAESWYQTK	2	1	1	P13647		0	3.33509e+07	0	0.0003165		37.11	0.00128394	2	1242.57	1.29886	27.9513	0
	High	NKYEDEINKR	3	5	4	P13647;P02538;P05787;P04264		0	2.70475e+07	0	0.001068		34.6	0.00454225	3	1308.65	-0.0705633	19.1982	2
	High	HEISEMNR	2	1	1	P13647		0	1.46101e+07	0	0.0004242		31.02	0.00339992	2	1015.46	-0.209159	16.8336	0
	High	QNLEPLFEQYINNLR	3	3	2	P13647;P02538		0	7.70606e+06	0	2.227e-05		30.55	0.0156827	2	1890.97	-0.144183	59.4437	0
	High	DVDAAYMNK	1	3	2	P13647;P02538		0	5.63379e+06	0	0.0003875		28.41	0.00685005	2	1026.46	-0.0185237	22.4029	0
	High	LLEGEEcR	2	4	3	P13647;P35908;P02538	C7(Methylthio)	0	3.04586e+07	0	0.001829		24.17	0.0158872	2	994.434	0.361059	26.8546	0
	High	FLEQQNK	1	6	5	P08670;P13647;P02538;P05787;P08729		0	813696	0	0.003012		20.46	0.134925	2	906.468	-0.322498	18.1858	0
	High	TTAENEFVmLK	2	1	1	P13647	M9(Oxidation)	0	1.98981e+06	0	0.003252		12.97	0.484475	2	1298.63	-2.11421	34.3262	0
	High	TTAENEFVMLK	2	1	1	P13647		0	1.24118e+07	0	0.002542		12.55	0.57814	2	1282.63	-1.63201	39.3231	0
	High	QLDSIVGER	1	2	2	P13647;P02538		0	1.67084e+07	0.001	0.007963		23.19	0.0580477	2	1016.54	0.125666	26.8564	0
	High	YEDEINKR	1	6	5	P13647;P35908;P02538;P05787;P04264		0	2.41184e+07	0.005	0.08144		24.43	0.0393031	2	1066.52	0.117946	17.2217	1
P02545	Prelamin-A/C OS=Homo sapiens OX=9606 GN=LMNA PE=1 SV=1 - [LMNA_HUMAN]	878.811	50.15	1	28	29	53	5.85815e+07	664	74.0947	7.02002	0.00595038
	A3	Sequence	# PSMs	# Proteins	# Protein Groups	Protein Group Accessions	Modifications	ΔCn	Area	q-Value	PEP		IonScore	Exp Value	Charge	MH+ [Da]	ΔM [ppm]	RT [min]	# Missed Cleavages
	High	LADALQELR	2	1	1	P02545		0	2.62505e+07	0	3.313e-07		78.16	1.39772e-07	2	1028.57	-0.481885	34.8492	0
	High	ITESEEVVSR	1	1	1	P02545		0	3.90492e+07	0	9.551e-08		74.17	5.60838e-07	2	1148.58	0.515727	20.4615	0
	High	IDSLSAQLSQLQK	2	1	1	P02545		0	4.71315e+07	0	4.091e-06		67.68	2.22644e-06	2	1430.79	0.0632369	40.9709	0
	High	AAYEAELGDAR	2	1	1	P02545		0	2.87968e+07	0	6.018e-07		63.08	4.82199e-06	2	1165.55	-0.473716	25.7247	0
	High	VAVEEVDEEGK	2	1	1	P02545		0	5.4553e+07	0	7.55e-08		61.7	5.81431e-06	2	1203.57	0.00906311	20.8651	0
	High	TALINSTGEEVAMR	2	1	1	P02545		0	3.94895e+07	0	2.656e-07		58.19	2.33626e-05	2	1491.75	-0.171248	32.5814	0
	High	SGAQASSTPLSPTR	2	1	1	P02545		0	7.39284e+07	0	2.096e-05		55.54	3.50464e-05	2	1359.68	-6.92357	19.8325	0
	High	NSNLVGAAHEELQQSR	4	1	1	P02545		0	4.7263e+07	0	8.479e-08		52.91	7.57289e-05	2	1752.86	-0.317934	28.2554	0
	High	ASASGSGAQVGGPISSGSSASSVTVTR	3	1	1	P02545		0	2.06691e+07	0	1.292e-07		49.43	0.000180159	2	2365.16	0.0532676	27.6128	0
	High	TVLcGTcGQPADK	2	1	1	P02545	C4(Methylthio); C7(Methylthio)	0	9.41818e+06	0	2.876e-06		48.72	3.75974e-05	2	1384.57	-0.559174	37.7108	0
	High	AQHEDQVEQYKK	2	1	1	P02545		0	1.3751e+07	0	3.79e-05		45.41	0.000315075	2	1502.72	-0.896908	16.1655	1
	High	MQQQLDEYQELLDIK	2	1	1	P02545		0	4.23893e+07	0	9.309e-08		41.55	0.00108126	2	1893.93	-0.0719354	52.2626	0
	High	KQLQDEMLR	1	1	1	P02545		0	5.87178e+06	0	0.003595		37.22	0.00290196	2	1160.61	0.226923	23.1772	1
	High	EGDLIAAQAR	2	1	1	P02545		0	2.61038e+07	0	0.0004144		37.15	0.00189861	2	1043.55	0.429508	22.8303	0
	High	LEAALGEAK	1	1	1	P02545		0	3.21149e+07	0	0.00349		33.99	0.00347152	2	901.5	1.0474	21.1133	0
	High	EDLQELNDR	2	1	1	P02545		0	2.27492e+07	0	0.0007841		30.72	0.00588823	2	1131.53	0.796049	23.6753	0
	High	EAALSTALSEK	2	1	1	P02545		0	4.31624e+07	0	0.0009925		30.42	0.0121648	2	1119.59	-0.954758	27.1552	0
	High	SNEDQSMGNWQIK	1	1	1	P02545		0	2.72708e+07	0	5.493e-05		29.78	0.00620658	2	1536.67	-0.0462584	34.1119	0
	High	SVGGSGGGSFGDNLVTR	2	1	1	P02545		0	1.38461e+07	0	0.0009096		28.58	0.0137982	2	1566.75	-2.6371	31.8786	0
	High	LQEKEDLQELNDR	2	1	1	P02545		0	3.63264e+06	0	0.0002528		27.69	0.0209365	2	1629.81	0.660359	25.2904	1
	High	AQNTWGcGNSLR	2	1	1	P02545	C7(Methylthio)	0	5.63776e+06	0	9.271e-05		24.4	0.0130708	2	1352.58	-3.01572	36.7148	0
	High	AGQVVTIWAAGAGATHSPPTDLVWK	2	1	1	P02545		0	2.45486e+07	0	0.0008906		18.53	0.222346	3	2533.32	-0.984612	52.5132	0
	High	SNEDQSmGNWQIK	1	1	1	P02545	M7(Oxidation)	0	2.763e+06	0	0.0001221		17.07	0.102095	2	1552.67	-0.230041	26.7177	0
	High	LLEGEEER	1	3	3	P02545;P20700;Q03252		0	1.66832e+07	0	0.003197		14.96	0.250536	2	974.478	-0.606665	19.4752	0
	High	QLQDEMLR	2	1	1	P02545		0	24822521	0.001	0.004632		32.65	0.00578562	2	1032.51	-0.218511	27.4295	0
	High	EELDFQK	2	1	1	P02545		0	1.10807e+07	0.001	0.01739		28.45	0.0131458	2	908.436	0.0566413	25.0042	0
	High	DLEDSLAR	1	1	1	P02545		0	1.33623e+07	0.001	0.007529		24.15	0.0363439	2	918.453	0.126433	27.0758	0
	High	QNGDDPLLTYR	1	1	1	P02545		0	1.00275e+07	0.001	0.007334		20.66	0.0996456	2	1291.63	-0.297582	34.6707	0
	High	LAVYIDR	1	1	1	P02545		0	9.49491e+06	0.001	0.005408		17.61	0.124834	2	849.483	-0.0171636	29.2171	0
	High	NIYSEELR	1	1	1	P02545		0	2.74224e+07	0.009	0.1438		13.13	0.462087	2	1023.51	-0.154102	28.2476	0
P12814	Alpha-actinin-1 OS=Homo sapiens OX=9606 GN=ACTN1 PE=1 SV=2 - [ACTN1_HUMAN]	863.618	41.82	1	18	29	57	2.34607e+07	892	102.993	5.41455	0.00639946
	A3	Sequence	# PSMs	# Proteins	# Protein Groups	Protein Group Accessions	Modifications	ΔCn	Area	q-Value	PEP		IonScore	Exp Value	Charge	MH+ [Da]	ΔM [ppm]	RT [min]	# Missed Cleavages
	High	IcDQWDNLGALTQK	2	1	1	P12814	C2(Methylthio)	0	8.45295e+06	0	1.484e-07		69.57	9.7711e-07	2	1650.76	1.18917	51.4926	0
	High	VGWEQLLTTIAR	3	2	2	P12814;O43707		0	1.02641e+07	0	1.017e-07		69.11	1.60795e-06	2	1386.77	-0.577125	60.3385	0
	High	LLETIDQLYLEYAK	2	1	1	P12814		0	6.94405e+06	0	1.82e-08		68.03	1.79434e-06	2	1711.91	-0.21421	58.0879	0
	High	LASDLLEWIR	2	2	2	P12814;O43707		0	1.87451e+07	0	1.428e-06		60.95	1.10485e-05	2	1215.67	-0.799961	57.2783	0
	High	FAIQDISVEETSAK	2	2	2	P12814;O43707		0	2.58059e+07	0	2.354e-08		55.9	3.39292e-05	2	1537.78	0.609272	40.6584	0
	High	DDPLTNLNTAFDVAEK	2	1	1	P12814		0	5.46763e+06	0	2.924e-06		52.58	7.06659e-05	2	1762.85	0.38231	51.7215	0
	High	cQLEINFNTLQTK	2	2	2	P12814;O43707	C1(Methylthio)	0	3.33606e+06	0	1.462e-07		51.96	8.31018e-05	2	1597.77	-0.333432	51.0112	0
	High	GYEEWLLNEIR	2	2	2	P12814;O43707		0	9.43735e+06	0	4.461e-05		49.57	0.000164508	2	1421.71	-0.537035	55.7372	0
	High	TINEVENQILTR	2	2	2	P12814;O43707		0	2.58312e+07	0	1.724e-06		46.96	0.000303065	2	1429.76	0.158632	37.9753	0
	High	ETADTDTADQVMASFK	2	1	1	P12814		0	1.04247e+07	0	2.136e-07		46.83	0.000107896	2	1729.76	0.0597141	41.9036	0
	High	LVSIGAEEIVDGNVK	2	1	1	P12814		0	9.55332e+06	0	1.342e-06		45.97	0.000332603	2	1542.84	1.42329	41.4439	0
	High	ALDFIASK	2	2	2	P12814;O43707		0	5.40211e+06	0	9.685e-05		39.44	0.000841844	2	864.482	-0.352733	32.9415	0
	High	IDQLEGDHQLIQEALIFDNK	1	1	1	P12814		0	8.99861e+06	0	1.643e-08		36.8	0.00349957	3	2339.19	-0.0658529	52.9844	0
	High	AGTQIENIEEDFR	2	1	1	P12814		0	8.66661e+06	0	3.628e-06		35.46	0.00280179	2	1521.72	-0.0710995	43.6075	0
	High	DLLLDPAWEK	2	2	2	P12814;O43707		0	1.13735e+07	0	0.002706		35.19	0.00320853	2	1199.63	-0.15883	48.769	0
	High	GISQEQMNEFR	2	1	1	P12814		0	1.12821e+07	0	0.0002055		35.05	0.00234456	2	1338.61	0.838708	30.0622	0
	High	DYETATLSEIK	1	1	1	P12814		0	2.349e+06	0	0.0002066		32.56	0.00607315	2	1269.62	-1.27677	36.6066	0
	High	VLAVNQENEQLMEDYEK	2	1	1	P12814		0	1.60962e+07	0	3.526e-07		31.28	0.00770798	2	2051.96	-0.747662	40.3861	0
	High	RDQALTEEHAR	4	1	1	P12814		0	4.31661e+06	0	0.0002855		30.36	0.0115056	3	1325.66	0.432127	15.5919	1
	High	MLDAEDIVGTARPDEK	4	1	1	P12814		0	1.08052e+07	0	6.268e-05		29.32	0.015262	3	1759.85	-1.46672	37.2335	0
	High	MVSDINNAWGcLEQVEK	2	1	1	P12814	C11(Methylthio)	0	5.00248e+06	0	7.987e-05		26.33	0.0181591	2	1981.88	0.199496	56.4261	0
	High	DHSGTLGPEEFK	1	1	1	P12814		0	6.23811e+06	0	0.001157		25.71	0.0179918	2	1316.61	0.340963	26.3029	0
	High	EGLLLWcQR	2	2	2	P12814;O43707	C7(Methylthio)	0	2.34497e+06	0	0.002054		21.4	0.088019	2	1163.57	-0.260021	56.1979	0
	High	KDDPLTNLNTAFDVAEK	2	1	1	P12814		0	5.60913e+06	0	0.0002701		20.93	0.11382	2	1890.94	-0.288768	45.8823	1
	High	VEQIAAIAQELNELDYYDSPSVNAR	1	1	1	P12814		0	5.25914e+06	0	6.662e-05		12.37	1.04297	3	2808.37	-0.718542	58.7186	0
	High	ELPPDQAEYcIAR	2	2	2	P12814;O43707	C10(Methylthio)	0	1.57536e+07	0	0.003242		11.27	0.395618	2	1550.7	-0.970944	40.2573	0
	High	HEAFESDLAAHQDR	1	2	2	P12814;O43707		0	7.84083e+06	0	0.001432		10.62	0.619878	3	1625.73	-0.1634	22.8385	0
	High	ASFNHFDR	2	1	1	P12814		0	1.77288e+06	0.001	0.01103		25.46	0.0180623	2	993.453	-0.326699	21.7038	0
	High	ATLPDADKER	1	1	1	P12814		0	3.73874e+06	0.002	0.02339		19.46	0.109843	2	1115.57	0.610018	17.8851	1
P07355	Annexin A2 OS=Homo sapiens OX=9606 GN=ANXA2 PE=1 SV=2 - [ANXA2_HUMAN]	856.441	57.82	1	19	19	58	1.83405e+08	339	38.5798	7.75244	0.00651173
	A3	Sequence	# PSMs	# Proteins	# Protein Groups	Protein Group Accessions	Modifications	ΔCn	Area	q-Value	PEP		IonScore	Exp Value	Charge	MH+ [Da]	ΔM [ppm]	RT [min]	# Missed Cleavages
	High	SALSGHLETVILGLLK	4	1	1	P07355		0	5.34647e+06	0	5.932e-09		73.67	1.31009e-07	2	1650.98	0.202514	65.0701	0
	High	GLGTDEDSLIEIIcSR	6	1	1	P07355	C14(Methylthio)	0	4.92193e+07	0	2.038e-06		61.74	8.97645e-06	2	1766.83	-0.275594	62.3842	0
	High	TPAQYDASELK	4	1	1	P07355		0	2.38435e+08	0	1.891e-06		55.87	3.39056e-05	2	1222.6	0.472236	23.937	0
	High	DALNIETAIK	2	1	1	P07355		0	4.91902e+07	0	5.223e-05		53.78	5.56995e-05	2	1087.6	-0.681215	37.2236	0
	High	GVDEVTIVNILTNR	4	1	1	P07355		0	7.91394e+07	0	1.984e-07		53.77	7.97542e-05	2	1542.85	0.243266	55.5624	0
	High	DIISDTSGDFR	3	1	1	P07355		0	5.26317e+07	0	4.769e-06		45.83	0.000202443	2	1225.57	-0.65938	36.2897	0
	High	TNQELQEINR	5	1	1	P07355		0	1.61434e+08	0	7.687e-05		45.61	0.000391575	2	1244.62	0.369095	22.444	0
	High	SYSPYDMLESIR	2	1	1	P07355		0	1.29037e+08	0	8.211e-06		39.36	0.000915434	2	1460.67	-0.498881	52.6202	0
	High	QDIAFAYQR	3	1	1	P07355		0	3.82958e+07	0	0.0002293		38.8	0.00143031	2	1111.55	-0.524912	31.5166	0
	High	SLYYYIQQDTK	2	1	1	P07355		0	9.11426e+07	0	9.657e-06		36.86	0.00289519	2	1421.69	-0.673925	40.3842	0
	High	sTVHEILcK	4	1	1	P07355	N-Term(Acetyl); C8(Methylthio)	0	1.50345e+08	0	5.972e-05		35.42	0.00271289	2	1117.54	-0.377656	39.082	0
	High	AEDGSVIDYELIDQDAR	4	1	1	P07355		0	1.09722e+08	0	4.617e-05		27.8	0.0181725	2	1908.88	0.713098	44.1318	0
	High	LSLEGDHSTPPSAYGSVK	3	1	1	P07355		0	1.41525e+08	0	0.0002159		27.59	0.0232531	2	1844.9	-1.47619	29.3174	0
	High	WISIMTER	2	1	1	P07355		0	5.64034e+07	0	0.0001705		27.48	0.0226884	2	1035.53	-0.126473	42.0216	0
	High	RAEDGSVIDYELIDQDAR	4	1	1	P07355		0	3.8794e+07	0	3.835e-05		26.81	0.0238674	3	2064.97	-4.21689	40.6939	1
	High	AYTNFDAER	2	1	1	P07355		0	1.02138e+08	0.001	0.009479		29.12	0.00593939	2	1086.48	-1.52351	24.8286	0
	High	TDLEKDIISDTSGDFR	1	1	1	P07355		0	4.98131e+06	0.001	0.01138		22.53	0.0759519	2	1811.87	1.23535	44.0191	1
	High	DIISDTSGDFRK	2	1	1	P07355		0	6.14091e+06	0.001	0.01774		21.27	0.0970383	2	1353.66	-0.596464	31.4601	1
	High	DLYDAGVK	1	1	1	P07355		0	2.26249e+07	0.007	0.1177		13.14	0.473156	2	880.442	0.527711	24.7179	0
P14625	Endoplasmin OS=Homo sapiens OX=9606 GN=HSP90B1 PE=1 SV=1 - [ENPL_HUMAN]	830.869	37.11	1	26	27	52	5.48976e+07	803	92.4113	4.84326	0.0058381
	A3	Sequence	# PSMs	# Proteins	# Protein Groups	Protein Group Accessions	Modifications	ΔCn	Area	q-Value	PEP		IonScore	Exp Value	Charge	MH+ [Da]	ΔM [ppm]	RT [min]	# Missed Cleavages
	High	EESDDEAAVEEEEEEK	2	1	1	P14625		0	6.56002e+06	0	2.534e-10		82.46	9.08071e-09	2	1866.72	-0.535065	23.0791	0
	High	GVVDSDDLPLNVSR	2	1	1	P14625		0	3.37302e+07	0	4.847e-08		78.59	1.89549e-07	2	1485.76	1.23296	37.8666	0
	High	ELISNASDALDK	2	2	2	P14625;P08238		0	9.59504e+07	0	2.297e-06		72.76	6.17058e-07	2	1275.64	-1.82092	29.8202	0
	High	LSLNIDPDAK	2	1	1	P14625		0	1.79093e+07	0	0.0001654		56.11	2.6205e-05	2	1085.58	0.914802	35.3919	0
	High	EEEAIQLDGLNASQIR	2	1	1	P14625		0	22548779	0	2.759e-07		51.67	0.000110965	2	1785.89	-1.88394	42.1383	0
	High	LGVIEDHSNR	2	1	1	P14625		0	10443833	0	5.823e-07		51.36	8.664e-05	2	1139.58	-0.0363604	19.4972	0
	High	DISTNYYASQK	2	1	1	P14625		0	1.75004e+07	0	1.564e-06		46.92	0.000129055	2	1289.6	0.217523	25.3885	0
	High	SILFVPTSAPR	2	1	1	P14625		0	2.25002e+07	0	6.158e-05		42.8	0.000674378	2	1187.68	0.556865	42.2492	0
	High	LTESPcALVASQYGWSGNMER	3	1	1	P14625	C6(Methylthio)	0	8.31233e+06	0	4.514e-07		41.32	0.000597702	2	2345.03	-0.548705	57.4147	0
	High	EEASDYLELDTIK	2	1	1	P14625		0	3.50122e+07	0	2.173e-05		40.28	0.00107351	2	1525.73	-0.89127	43.1317	0
	High	YSQFINFPIYVWSSK	1	1	1	P14625		0	2819204	0	1.026e-07		38.93	0.00209819	2	1878.94	-0.253919	60.2245	0
	High	NLLHVTDTGVGMTR	3	1	1	P14625		0	1.32692e+07	0	7.241e-06		37.58	0.00210372	2	1513.78	-0.960339	34.0544	0
	High	FAFQAEVNR	2	1	1	P14625		0	7.69811e+06	0	6.262e-06		36.89	0.00249666	2	1081.54	0.298627	33.4684	0
	High	IYFMAGSSR	2	1	1	P14625		0	3.97386e+06	0	2.09e-05		32.49	0.00456547	2	1031.5	-0.187143	32.6681	0
	High	LISLTDENALSGNEELTVK	2	1	1	P14625		0	2.38849e+07	0	1.915e-05		24.76	0.0589854	2	2046.06	-0.285128	45.9688	0
	High	TETVEEPMEEEEAAK	2	1	1	P14625		0	8.45701e+06	0	0.0001105		23.41	0.0198376	2	1721.74	-0.322047	25.8015	0
	High	TFEINPR	2	1	1	P14625		0	1.46262e+07	0	0.002426		20.76	0.117105	2	876.457	-0.611047	26.883	0
	High	IADDKYNDTFWK	2	1	1	P14625		0	9.30869e+06	0	0.002449		20.51	0.0813619	2	1515.71	-1.13934	36.0809	1
	High	EESDDEAAVEEEEEEKKPK	2	1	1	P14625		0	6.52906e+06	0	0.001432		18.49	0.082116	3	2219.97	0.270934	21.0787	1
	High	VFITDDFHDMMPK	3	1	1	P14625		0	1.55367e+07	0	0.0009994		17.46	0.143579	3	1595.72	-0.261171	48.6619	0
	High	EAESSPFVER	2	1	1	P14625		0	1.35277e+07	0	0.001855		16.21	0.205825	2	1150.54	-0.130535	24.4766	0
	High	SGYLLPDTK	1	1	1	P14625		0	0	0.001	0.004045		20.56	0.0944949	2	993.525	-0.2228	29.8264	0
	High	TETVEEPMEEEEAAKEEK	2	1	1	P14625		0	3.4037e+06	0.001	0.02031		11.8	0.41954	2	2107.92	-0.0286633	25.4733	1
	High	SGTSEFLNK	2	1	1	P14625		0	16072232	0.002	0.02416		20.18	0.0709956	2	982.484	-0.233136	23.391	0
	High	LIINSLYK	1	1	1	P14625		0	1.2876e+07	0.005	0.07414		10.85	0.213783	2	963.587	-0.741827	38.3796	0
	High	YNDTFWK	1	1	1	P14625		0	2.7184e+06	0.007	0.1143		14.46	0.121753	2	973.434	-7.62634	36.6753	0
	High	GLFDEYGSK	1	1	1	P14625		0	4.60996e+06	0.009	0.1496		19.87	0.0556409	2	1015.47	-2.35416	34.5497	0
Q09666	Neuroblast differentiation-associated protein AHNAK OS=Homo sapiens OX=9606 GN=AHNAK PE=1 SV=2 - [AHNK_HUMAN]	811.594	27.86	1	61	61	87	2.73189e+07	5890	628.699	6.15088	0.0097676
	A3	Sequence	# PSMs	# Proteins	# Protein Groups	Protein Group Accessions	Modifications	ΔCn	Area	q-Value	PEP		IonScore	Exp Value	Charge	MH+ [Da]	ΔM [ppm]	RT [min]	# Missed Cleavages
	High	GEGPEVDVNLPK	2	1	1	Q09666		0	1.94083e+07	0	4.746e-06		66.78	2.30883e-06	2	1253.64	-0.118647	32.6823	0
	High	MDVNVGDIDIEGPEGK	2	1	1	Q09666		0	4463178	0	4.629e-07		61.15	6.59931e-06	2	1687.78	-0.349704	43.7907	0
	High	ISMPDIDLNLK	3	1	1	Q09666		0	1.75116e+07	0	2.182e-06		52.3	8.53823e-05	2	1258.67	-0.024727	49.7076	0
	High	LPSGSGAASPTGSAVDIR	2	1	1	Q09666		0	1.34252e+07	0	6.803e-06		48.35	0.000197394	2	1642.84	0.411641	28.2024	0
	High	ADIDVSGPK	2	1	1	Q09666		0	2.81117e+07	0	1.414e-05		47.49	0.000137243	2	901.462	-0.630757	20.4853	0
	High	VNVEAPDVNLEGLGGK	2	1	1	Q09666		0	5.90546e+06	0	4.473e-06		47.13	0.000245926	2	1610.84	-0.968216	41.6319	0
	High	LEGDLTGPSVGVEVPDVELEcPDAK	1	1	1	Q09666	C21(Methylthio)	0	1.79369e+06	0	2.615e-06		43.34	0.000614067	2	2614.22	-1.69874	54.4942	0
	High	TPSFGISAPQVSIPDVNVNLK	1	1	1	Q09666		0	1.04253e+06	0	6.739e-06		39.22	0.0016515	2	2183.17	-0.586353	54.231	0
	High	VDIDAPDVDVHGPDWHLK	3	1	1	Q09666		0	6.5747e+06	0	2.406e-06		37.52	0.00251355	2	2027.98	0.538794	41.8053	0
	High	IEGEMQVPDVDIR	2	1	1	Q09666		0	4.89881e+06	0	2.559e-05		37.1	0.00191085	2	1500.73	-4.2201	40.7046	0
	High	ADVDVSGPK	1	1	1	Q09666		0	1.98826e+06	0	0.0003333		36.71	0.00148247	2	887.447	-0.131115	18.1698	0
	High	GEGPDVDVNLPK	2	1	1	Q09666		0	1.91536e+07	0	0.0002565		34.3	0.00440269	2	1239.62	0.294074	32.1705	0
	High	VEGDMQVPDLDIK	2	1	1	Q09666		0	4.0239e+06	0	2.066e-05		33.18	0.0053854	2	1458.71	-1.5311	41.9777	0
	High	AEGPEVDVNLPK	1	1	1	Q09666		0	2.9795e+07	0	4.173e-05		33.04	0.00608326	2	1267.65	-1.00372	32.9917	0
	High	VDVEVPDVSLEGPEGK	2	1	1	Q09666		0	1.94738e+07	0	1.564e-05		31.18	0.0108215	2	1668.83	-0.634373	42.3621	0
	High	GDVDVSLPK	2	1	1	Q09666		0	1.31186e+07	0	0.001099		30.85	0.00715351	2	929.495	0.976095	27.941	0
	High	VDIDVPDVDVQGPDWHLK	2	1	1	Q09666		0	5.31527e+06	0	1.557e-05		30.83	0.0139187	3	2047.01	0.753451	49.8451	0
	High	ISMPDIDFNLK	1	1	1	Q09666		0	2.95399e+06	0	0.0002507		29.12	0.0162262	2	1292.66	0.0896969	51.8719	0
	High	VDIDVPDVNLEAPEGK	1	1	1	Q09666		0	5.72557e+06	0	0.0001422		28.79	0.0196212	2	1709.86	-0.868853	44.8479	0
	High	MDAEVPDVNIEGPDAK	2	1	1	Q09666		0	5.06543e+06	0	0.0006958		28.73	0.0113203	2	1699.78	-0.203605	37.4802	0
	High	GPFVEAEVPDVDLEcPDAK	1	1	1	Q09666	C15(Methylthio)	0	5.45306e+06	0	0.00288		28.5	0.009464	2	2075.91	-9.01664	52.8196	0
	High	ISMPDFDLHLK	2	1	1	Q09666		0	2.84893e+06	0	0.0002116		26.93	0.026664	3	1315.67	-0.215112	48.4057	0
	High	ISMQDVDLSLGSPK	1	1	1	Q09666		0	2.80212e+06	0	0.0001244		26.61	0.0314313	2	1489.75	-1.55003	43.5047	0
	High	VGGSGVNVNAK	2	1	1	Q09666		0	3.08486e+06	0	0.00107		26.16	0.0289313	2	1001.54	-0.21193	17.3939	0
	High	ISMPDVDLHLK	2	1	1	Q09666		0	1.06753e+07	0	9.423e-05		25.4	0.0340316	3	1267.67	-0.584363	42.0898	0
	High	VDIDVPDVNIEGPDAK	1	1	1	Q09666		0	2.34048e+07	0	2.003e-05		25.02	0.0487901	2	1695.84	0.146458	43.6684	0
	High	GEGPEVDVTLPK	2	1	1	Q09666		0	2.42406e+06	0	0.0003314		24.87	0.0436621	2	1240.64	-1.48873	34.3842	0
	High	DDGVFVQEVTQNSPAAR	1	1	1	Q09666		0	8.00953e+06	0	0.0001761		24.62	0.0422801	2	1832.88	-1.16187	39.524	0
	High	GPQITGPSLEGDLGLK	2	1	1	Q09666		0	6.7379e+06	0	4.834e-05		24.55	0.04665	2	1581.85	-1.4125	45.0908	0
	High	GHYEVTGSDDETGK	1	1	1	Q09666		0	2.41246e+06	0	0.001583		22.24	0.0223888	2	1494.63	-0.596032	17.8892	0
	High	VDVDVPDVNIEGPDAK	2	1	1	Q09666		0	1.88994e+07	0	0.003264		21.9	0.0871633	2	1681.83	-1.50684	40.323	0
	High	ASLGSLEGEAEAEASSPK	1	1	1	Q09666		0	3810111	0	0.001068		21.6	0.0719504	2	1732.82	-0.70752	38.7416	0
	High	VGVEVPDVNIEGPEGK	1	1	1	Q09666		0	5.52549e+06	0	0.001481		20.79	0.120884	2	1637.84	0.218138	40.999	0
	High	ISMPDIDLNLTGPK	2	1	1	Q09666		0	3.52124e+06	0	0.001381		20.49	0.106303	2	1513.79	-0.566374	51.5042	0
	High	APDVDVNIAGPDAALK	1	1	1	Q09666		0	6.15854e+06	0	7.198e-05		20.33	0.118171	2	1565.81	-1.32346	38.4631	0
	High	VDVEcPDVNIEGPEGK	2	1	1	Q09666	C5(Methylthio)	0	6.79178e+06	0	0.0003979		18.42	0.0877667	2	1745.77	0.338175	44.0744	0
	High	VSVGAPDLSLEASEGSIK	1	1	1	Q09666		0	0	0	0.0005901		18.07	0.237832	2	1758.91	0.390028	40.9277	0
	High	ISIPDVDLDLK	1	1	1	Q09666		0	3.11542e+06	0	0.0006732		16.92	0.187993	2	1227.68	-0.802158	49.9139	0
	High	VDIEAPDVSLEGPEGK	1	1	1	Q09666		0	5.39564e+06	0	0.0005143		15.93	0.375247	2	1654.82	0.555628	39.7991	0
	High	VDIDAPDVSIEGPDAK	1	1	1	Q09666		0	4.18465e+06	0	0.002632		15.66	0.361286	2	1640.8	0.426817	37.7219	0
	High	GDVPSVGLEGPDVDLQGPEAK	1	1	1	Q09666		0	2.69884e+06	0	0.0006223		15.32	0.48765	2	2079.02	-1.39174	42.7551	0
	High	GPSLDIDTPDVNIEGPEGK	1	1	1	Q09666		0	1.44172e+07	0	0.003103		14.75	0.504123	2	1952.95	2.63574	43.0259	0
	High	IDVTAPDVSIEEPEGK	1	1	1	Q09666		0	4.14132e+06	0	0.0002577		14.63	0.483812	2	1698.84	-0.15665	37.713	0
	High	VDTNAPDLSLEGPEGK	2	1	1	Q09666		0	7.24253e+06	0	0.0004265		14.61	0.473937	2	1641.8	0.1287	33.477	0
	High	VDVSAPDVEMQGPDWNLK	1	1	1	Q09666		0	3.58813e+06	0	0.001776		14.53	0.473939	2	1999.94	-0.0202692	46.7686	0
	High	VDINAPDVDVQGPDWHLK	1	1	1	Q09666		0	5.06668e+06	0	0.002879		11.87	0.991448	3	2018	-0.384954	44.5519	0
	High	VSAPGVQGDVK	1	1	1	Q09666		0	4.144e+06	0.001	0.004213		26.63	0.0202061	2	1056.57	-1.78444	20.428	0
	High	ADVVVSGPK	1	1	1	Q09666		0	2.52996e+06	0.001	0.01068		23.68	0.0254986	2	871.488	-0.0946097	19.4512	0
	High	ISMPEVDLNLK	1	1	1	Q09666		0	3.29619e+06	0.001	0.006954		22.08	0.0891995	2	1258.67	-0.315678	50.5141	0
	High	VDINAPDVEVQGK	1	1	1	Q09666		0	6.96051e+06	0.001	0.01069		16.51	0.319401	2	1383.71	-1.7918	30.1683	0
	High	ISMPDVDLNLK	1	1	1	Q09666		0	3.73484e+06	0.001	0.004864		14.67	0.421373	2	1244.66	0.583534	46.0592	0
	High	LNVGAPDVTLR	2	1	1	Q09666		0	2.55547e+06	0.001	0.00962		14.58	0.290862	2	1154.65	-1.14705	35.5211	0
	High	GPGVDLPSVNLSMPK	1	1	1	Q09666		0	3.30348e+06	0.001	0.004676		13.57	0.665906	2	1510.79	-1.68134	47.3533	0
	High	VDIETPNLEGTLTGPR	1	1	1	Q09666		0	4.97777e+06	0.001	0.01114		10.02	1.2791	2	1711.89	0.692452	43.679	0
	High	ISMPDFDLNLK	1	1	1	Q09666		0	2.95399e+06	0.003	0.04156		11.74	0.947887	2	1292.65	-0.854641	51.9194	0
	High	VDVDIPDVNIEGPDAK	1	1	1	Q09666		0	2.34048e+07	0.003	0.04739		10.75	1.24106	2	1695.84	-1.07724	43.7078	0
	High	VDINAPDVDVR	1	1	1	Q09666		0	2.65737e+06	0.004	0.06963		11.89	0.595371	2	1212.62	-0.877514	32.0144	0
	High	VKGDADVSVPK	1	1	1	Q09666		0	3.55337e+06	0.005	0.08051		21.63	0.0652715	2	1114.61	-0.815264	19.0175	1
	High	GEGPEVDVK	1	1	1	Q09666		0	1.11044e+06	0.005	0.07978		12.94	0.266784	2	929.457	-0.26827	19.7825	0
	High	MPEMNIK	1	1	1	Q09666		0	2.40499e+07	0.006	0.09628		15	0.289348	2	862.415	-0.844637	26.8602	0
	High	LEGPDVSLK	1	1	1	Q09666		0	2.55427e+06	0.007	0.1187		15.93	0.196558	2	957.525	-0.060836	28.3325	0
P07900	Heat shock protein HSP 90-alpha OS=Homo sapiens OX=9606 GN=HSP90AA1 PE=1 SV=5 - [HS90A_HUMAN]	806.824	37.98	1	14	23	56	1.37221e+08	732	84.6067	5.021	0.00628719
	A3	Sequence	# PSMs	# Proteins	# Protein Groups	Protein Group Accessions	Modifications	ΔCn	Area	q-Value	PEP		IonScore	Exp Value	Charge	MH+ [Da]	ΔM [ppm]	RT [min]	# Missed Cleavages
	High	TLTIVDTGIGMTK	4	1	2	P07900;P08238		0	4.84015e+07	0	1.489e-07		72.87	6.42938e-07	2	1349.73	-0.095353	41.6763	0
	High	ELISNSSDALDK	2	1	1	P07900		0	5.85091e+07	0	2.267e-05		58.94	1.72319e-05	2	1291.64	0.913757	26.0629	0
	High	ADLINNLGTIAK	3	2	2	P08238;P07900		0	1.41134e+08	0	1.195e-06		56.43	2.65049e-05	2	1242.71	-0.231468	41.0648	0
	High	DQVANSAFVER	2	1	1	P07900		0	2.75888e+07	0	6.716e-07		55.69	3.23729e-05	2	1235.6	0.146381	25.3808	0
	High	NPDDITNEEYGEFYK	2	1	1	P07900		0	9.13961e+07	0	5.881e-10		54.65	1.45676e-05	2	1833.78	-0.134024	38.9966	0
	High	EDQTEYLEER	2	3	3	Q58FF6;P08238;P07900		0	1.2867e+08	0	0.0001196		53.82	2.22e-05	2	1311.57	-0.719729	25.1605	0
	High	HSQFIGYPITLFVEK	4	1	1	P07900		0	2.2759e+07	0	1.851e-06		44.69	0.000482268	2	1778.95	-1.35095	55.3016	0
	High	HGLEVIYMIEPIDEYcVQQLK	2	1	1	P07900	C16(Methylthio)	0	843006	0	8.917e-10		40.26	0.00135632	3	2566.24	-0.595938	64.6293	0
	High	TLTIVDTGIGmTK	3	1	2	P07900;P08238	M11(Oxidation)	0	2.8305e+06	0	1.92e-05		40.22	0.00122153	2	1365.73	0.500712	37.441	0
	High	SLTNDWEDHLAVK	4	2	2	P08238;P07900		0	6.16185e+07	0	3.45e-06		39.34	0.00133292	2	1527.74	-0.82474	39.5753	0
	High	YYTSASGDEMVSLK	4	1	1	P07900		0	3.46641e+07	0	1.006e-06		38.7	0.000856591	2	1550.7	-0.130353	34.6832	0
	High	APFDLFENR	2	1	1	P07900		0	1.37692e+07	0	0.000194		36.21	0.00236938	2	1108.54	-0.512137	46.1498	0
	High	YIDQEELNK	1	2	2	P08238;P07900		0	141857335	0	0.0002316		35.27	0.003566	2	1151.56	0.298585	22.7211	0
	High	EGLELPEDEEEK	2	3	3	Q58FF6;P08238;P07900		0	5.88077e+07	0	9.384e-05		32.12	0.00359051	2	1416.64	-1.03289	30.7252	0
	High	DNSTMGYMAAK	2	1	1	P07900		0	1.05258e+07	0	0.0007924		31.58	0.00250209	2	1188.5	0.356681	24.6646	0
	High	ELHINLIPNK	2	1	1	P07900		0	1.40018e+07	0	0.0009496		26.84	0.0172857	2	1190.69	-1.6191	37.3404	0
	High	HIYYITGETK	2	1	1	P07900		0	5.44844e+07	0	0.001315		26.8	0.0223555	2	1224.63	-0.72161	25.7813	0
	High	YESLTDPSK	2	3	3	Q58FF6;P08238;P07900		0	8.04752e+07	0	0.001505		26.69	0.0247504	2	1039.49	0.516862	21.0064	0
	High	HLEINPDHSIIETLR	4	1	1	P07900		0	1.78036e+07	0	0.0003913		21.86	0.0944861	3	1786.94	-2.02419	40.1927	0
	High	VFIMDNcEELIPEYLNFIR	1	1	1	P07900	C7(Methylthio)	0	542496	0	0.0003472		12.61	0.660674	2	2404.14	0.117013	65.8897	0
	High	FYEQFSK	2	1	1	P07900		0	2.04826e+07	0.001	0.004834		26.29	0.0180922	2	948.446	0.0351005	27.0202	0
	High	LGIHEDSQNR	2	1	1	P07900		0	4.26046e+07	0.002	0.02463		25.57	0.0321705	2	1168.57	0.23711	17.4371	0
	High	HNDDEQYAWESSAGGSFTVR	1	2	2	P08238;P07900		0	0	0.002	0.02676		12.21	0.321628	3	2255.96	0.0204756	40.5954	0
	High	EGLELPEDEEEKK	1	3	3	Q58FF6;P08238;P07900		0	1.26179e+07	0.003	0.04595		17.01	0.199067	2	1544.73	-0.709715	27.024	1
P0DMV8	Heat shock 70 kDa protein 1A OS=Homo sapiens OX=9606 GN=HSPA1A PE=1 SV=1 - [HS71A_HUMAN]	804.928	46.96	1	20	22	53	1.22666e+08	641	70.009	5.65576	0.00595038
	A3	Sequence	# PSMs	# Proteins	# Protein Groups	Protein Group Accessions	Modifications	ΔCn	Area	q-Value	PEP		IonScore	Exp Value	Charge	MH+ [Da]	ΔM [ppm]	RT [min]	# Missed Cleavages
	High	IINEPTAAAIAYGLDR	3	1	1	P0DMV8		0	3.89725e+07	0	1.869e-10		79.79	1.50085e-07	2	1687.9	0.345896	46.9799	0
	High	LLQDFFNGR	2	1	1	P0DMV8		0	1.62579e+07	0	1.505e-05		58.2	1.79357e-05	2	1109.57	-0.304057	45.0846	0
	High	TTPSYVAFTDTER	2	2	2	P0DMV8;P11142		0	1.46346e+08	0	2.227e-06		57.29	1.66108e-05	2	1487.7	-0.307883	35.4567	0
	High	FGDPVVQSDMK	2	1	1	P0DMV8		0	2.88272e+07	0	0.00102		53.1	3.94272e-05	2	1222.57	-8.19011	29.3715	0
	High	VEIIANDQGNR	5	3	3	P0DMV8;P11021;P11142		0	1.33773e+08	0	1.362e-06		50.91	0.000116373	2	1228.63	0.495193	21.8887	0
	High	NQVALNPQNTVFDAK	2	1	1	P0DMV8		0	8.78796e+07	0	2.658e-07		50.87	0.000116222	2	1658.85	-0.48633	36.2403	0
	High	ATAGDTHLGGEDFDNR	4	1	1	P0DMV8		0	3.64825e+07	0	7.257e-06		50.1	5.52139e-05	2	1675.73	0.952481	24.0515	0
	High	cQEVISWLDANTLAEK	2	1	1	P0DMV8	C1(Methylthio)	0	3.39999e+06	0	5.875e-07		49.8	0.000105236	2	1865.88	-0.543443	55.3718	0
	High	SINPDEAVAYGAAVQAAILMGDK	3	1	1	P0DMV8		0	7.25049e+06	0	1.538e-07		45.82	0.000371782	2	2304.15	-0.33999	60.2341	0
	High	LVNHFVEEFK	3	1	1	P0DMV8		0	2.17751e+07	0	0.00148		44.7	0.000467605	2	1261.65	-5.38728	36.0107	0
	High	FEELcSDLFR	2	1	1	P0DMV8	C5(Methylthio)	0	2.33525e+07	0	3.917e-06		42.14	0.000204666	2	1304.56	-0.501046	57.7111	0
	High	DAGVIAGLNVLR	2	1	1	P0DMV8		0	1.8769e+07	0	0.0005573		39.63	0.000718694	2	1197.7	1.26034	47.2428	0
	High	NALESYAFNMK	2	1	1	P0DMV8		0	1.7981e+07	0	8.754e-05		35.51	0.00208081	2	1287.6	-1.17177	42.084	0
	High	AFYPEEISSMVLTK	3	1	1	P0DMV8		0	3.20515e+07	0	1.614e-06		34.33	0.00542397	2	1614.81	0.0482896	53.7749	0
	High	AQIHDLVLVGGSTR	2	1	1	P0DMV8		0	1.70838e+07	0	0.0001837		33.58	0.00491154	2	1465.81	-4.60756	33.5821	0
	High	YKAEDEVQR	2	1	1	P0DMV8		0	2.0309e+07	0	0.00337		29.99	0.0133808	2	1137.55	-0.113379	17.0371	1
	High	ELEQVcNPIISGLYQGAGGPGPGGFGAQGPK	3	1	1	P0DMV8	C6(Methylthio)	0	3.02067e+07	0	3.043e-06		26.76	0.0363738	3	3044.46	0.398706	58.3397	0
	High	FGDPVVQSDmK	2	1	1	P0DMV8	M10(Oxidation)	0	2.27386e+06	0	0.0004503		24.54	0.0298826	2	1238.57	-0.923467	24.1297	0
	High	QTQIFTTYSDNQPGVLIQVYEGER	1	1	1	P0DMV8		0	8.69144e+06	0	1.828e-05		15.18	0.520312	3	2786.36	0.0230057	53.7878	0
	High	STLEPVEK	2	1	1	P0DMV8		0	8.29403e+06	0.001	0.006462		28	0.0148188	2	902.484	0.853103	19.2632	0
	High	cQEVISWLDANTLAEKDEFEHK	1	1	1	P0DMV8	C1(Methylthio)	0	1.35705e+07	0.002	0.02272		15.84	0.261918	3	2651.21	-0.977555	53.1837	1
	High	GGSGSGPTIEEVD	2	1	1	P0DMV8		0	9.93909e+06	0.002	0.02974		14.61	0.160862	2	1204.53	0.619024	26.4585	0
	High	SAVEDEGLK	1	1	1	P0DMV8		0	2.12063e+07	0.006	0.09346		18.11	0.145254	2	947.469	0.57331	19.0405	0
P02787	Serotransferrin OS=Homo sapiens OX=9606 GN=TF PE=1 SV=3 - [TRFE_HUMAN]	799.036	54.44	1	28	28	52	6.22893e+07	698	77.0136	7.12256	0.0058381
	A3	Sequence	# PSMs	# Proteins	# Protein Groups	Protein Group Accessions	Modifications	ΔCn	Area	q-Value	PEP		IonScore	Exp Value	Charge	MH+ [Da]	ΔM [ppm]	RT [min]	# Missed Cleavages
	High	IMNGEADAMSLDGGFVYIAGK	2	1	1	P02787		0	2.04198e+07	0	2.144e-08		59.41	1.44907e-05	2	2159.01	-1.55585	53.1727	0
	High	FDEFFSEGcAPGSK	2	1	1	P02787	C9(Methylthio)	0	5.37003e+07	0	1.949e-07		58.42	1.87044e-06	2	1566.62	-1.2156	46.682	0
	High	LcMGSGLNLcEPNNK	2	1	1	P02787	C2(Methylthio); C10(Methylthio)	0	3.52052e+07	0	3.852e-08		54.51	1.39829e-05	2	1684.7	-1.48564	51.9304	0
	High	DGAGDVAFVK	2	1	1	P02787		0	2.62315e+07	0	1.315e-05		53.77	4.91118e-05	2	978.489	0.282253	27.4334	0
	High	cSTSSLLEAcTFR	2	1	1	P02787	C1(Methylthio); C10(Methylthio)	0	2.68304e+07	0	7.497e-06		52.06	1.8669e-05	2	1509.62	0.335169	58.0284	0
	High	DYELLcLDGTR	2	1	1	P02787	C6(Methylthio)	0	2.86019e+07	0	1.316e-06		51.43	4.5685e-05	2	1343.6	-0.877873	51.8792	0
	High	DSGFQMNQLR	1	1	1	P02787		0	11988569	0	0.0001116		51.14	6.8068e-05	2	1195.55	0.447336	32.8786	0
	High	ASYLDcIR	2	1	1	P02787	C6(Methylthio)	0	1.50422e+07	0	0.0001393		50.26	3.76756e-05	2	986.445	1.83054	44.0066	0
	High	SAGWNIPIGLLYcDLPEPR	3	1	1	P02787	C13(Methylthio)	0	1.03216e+07	0	2.041e-08		48.87	0.000199766	2	2160.06	-0.644411	64.3434	0
	High	IEcVSAETTEDcIAK	2	1	1	P02787	C3(Methylthio); C12(Methylthio)	0	5.6916e+07	0	2.33e-07		46.57	5.28702e-05	2	1703.7	0.0347829	43.4194	0
	High	TAGWNIPMGLLYNK	2	1	1	P02787		0	1.82212e+07	0	3.184e-06		42.42	0.000859194	2	1577.81	-0.870413	56.1773	0
	High	EGYYGYTGAFR	2	1	1	P02787		0	8.20011e+06	0	2.994e-05		40.68	0.000453185	2	1283.57	1.03685	37.9883	0
	High	SASDLTWDNLK	2	1	1	P02787		0	2.58977e+07	0	8.989e-06		39.34	0.001298	2	1249.61	-0.356073	38.4418	0
	High	DQYELLcLDNTR	2	1	1	P02787	C7(Methylthio)	0	1.12358e+07	0	7.236e-06		39.01	0.000715937	2	1528.67	-2.18402	50.2587	0
	High	MYLGYEYVTAIR	1	1	1	P02787		0	0	0	2.852e-06		38.91	0.00175442	2	1478.73	-0.12481	50.4484	0
	High	HSTIFENLANK	2	1	1	P02787		0	2.18017e+07	0	0.0001186		31.73	0.00839286	2	1273.65	-1.78902	31.3386	0
	High	EGTcPEAPTDEcKPVK	1	1	1	P02787	C4(Methylthio); C12(Methylthio)	0	4.2189e+07	0	1.235e-05		28.22	0.00354053	2	1795.74	-0.910011	31.9931	0
	High	EDPQTFYYAVAVVK	1	1	1	P02787		0	7.62517e+07	0	0.001998		24.8	0.0405636	2	1629.82	1.65651	48.7532	0
	High	KPVEEYANcHLAR	4	1	1	P02787	C9(Methylthio)	0	2.14771e+07	0	2.02e-06		24.69	0.0341323	3	1575.74	-1.43731	28.5604	0
	High	EFQLFSSPHGK	2	1	1	P02787		0	1.3438e+07	0	0.003662		23.04	0.0613292	2	1276.63	0.0128282	36.2467	0
	High	EDLIWELLNQAQEHFGK	2	1	1	P02787		0	2.2719e+06	0	0.0001456		22.91	0.0798224	3	2070.03	-0.394601	65.0506	0
	High	AIAANEADAVTLDAGLVYDAYLAPNNLKPVVAEFYGSK	1	1	1	P02787		0	4.46824e+06	0	1.622e-05		16.66	0.349555	3	3954.02	-0.21464	63.6729	0
	High	DSAHGFLK	2	1	1	P02787		0	9.25392e+06	0.001	0.01345		21.36	0.0712861	2	874.443	1.5799	21.3369	0
	High	DcHLAQVPSHTVVAR	2	1	1	P02787	C2(Methylthio)	0	1.24475e+07	0.001	0.005279		17.79	0.224561	2	1678.81	-1.55028	30.2383	0
	High	SVIPSDGPSVAcVK	2	1	1	P02787	C12(Methylthio)	0	4.43576e+07	0.001	0.005037		15.58	0.30298	2	1404.69	0.0744619	38.0892	0
	High	HQTVPQNTGGK	1	1	1	P02787		0	535711	0.001	0.01112		10.56	1.00209	2	1166.59	-0.580777	14.0318	0
	High	DDTVcLAK	2	1	1	P02787	C5(Methylthio)	0	1.06663e+07	0.005	0.08725		18.74	0.0721762	2	910.402	0.820107	26.3966	0
	High	YLGEEYVK	1	1	1	P02787		0	1.57057e+07	0.005	0.07409		14.14	0.25827	2	1000.5	0.0934787	32.2837	0
P05783	Keratin, type I cytoskeletal 18 OS=Homo sapiens OX=9606 GN=KRT18 PE=1 SV=2 - [K1C18_HUMAN]	774.447	54.19	1	19	19	48	9.37409e+07	430	48.0285	5.45264	-
	A3	Sequence	# PSMs	# Proteins	# Protein Groups	Protein Group Accessions	Modifications	ΔCn	Area	q-Value	PEP		IonScore	Exp Value	Charge	MH+ [Da]	ΔM [ppm]	RT [min]	# Missed Cleavages
	High	LQLETEIEALKEELLFMK	4	1	1	P05783		0	2.44527e+06	0	2.322e-09		68.26	1.79135e-06	2	2177.18	-0.431765	64.6559	1
	High	LEAEIATYR	4	1	1	P05783		0	6.5431e+07	0	3.379e-07		65.08	3.15113e-06	2	1065.56	0.115889	28.6934	0
	High	GGMGSGGLATGIAGGLAGMGGIQNEK	4	1	1	P05783		0	8.73655e+07	0	1.809e-08		61.58	1.08424e-05	2	2261.1	-1.00509	49.4075	0
	High	GLQAQIASSGLTVEVDAPK	3	1	1	P05783		0	4.62218e+07	0	8.904e-08		59.02	1.87345e-05	2	1884.01	-0.912135	43.8421	0
	High	AQIFANTVDNAR	2	1	1	P05783		0	63685510	0	3.239e-06		56.93	3.03139e-05	2	1319.67	0.951061	28.8869	0
	High	TVQSLEIDLDSMR	4	1	1	P05783		0	6.3912e+07	0	1.252e-05		48.9	0.000179711	2	1506.74	-2.69844	47.82	0
	High	LLEDGEDFNLGDALDSSNSMQTIQK	3	1	1	P05783		0	5.62266e+07	0	1.186e-07		42.73	0.000642669	2	2740.26	-0.594759	51.7816	0
	High	QAQEYEALLNIK	2	1	1	P05783		0	1.09555e+08	0	0.0003469		37.9	0.0026922	2	1419.75	-1.13251	44.8336	0
	High	ETMQSLNDR	2	1	1	P05783		0	5.35093e+07	0	8.457e-05		35.52	0.00152896	2	1093.49	0.566391	19.7693	0
	High	YETELAMR	2	1	1	P05783		0	3.7038e+07	0	1.639e-05		33.02	0.00346725	2	1012.48	0.364601	26.957	0
	High	VIDDTNITR	2	1	1	P05783		0	7.16087e+07	0	0.0002114		32.07	0.00769878	2	1046.55	4.14528	21.5637	0
	High	ASLENSLR	2	1	1	P05783		0	7.71766e+07	0	0.0025		31.86	0.010589	2	889.474	0.744899	22.7767	0
	High	IVLQIDNAR	3	1	1	P05783		0	5.99006e+07	0	0.0005364		31.7	0.00392128	2	1041.6	-0.489095	31.5928	0
	High	YALQmEQLNGILLHLESELAQTR	1	1	1	P05783	M5(Oxidation)	0	568610	0	0.0001955		13.81	0.655059	3	2686.38	-0.745767	64.1938	0
	High	TVQSLEIDLDSmR	1	1	1	P05783	M12(Oxidation)	0	5.64728e+06	0	0.001055		11.96	0.799178	2	1522.74	-0.533186	39.2934	0
	High	AQYDELAR	2	1	1	P05783		0	8.4302e+07	0.001	0.00704		27.92	0.0172736	2	965.468	-1.12212	23.1126	0
	High	QSVENDIHGLR	3	1	1	P05783		0	4.04446e+07	0.001	0.01784		16.18	0.307263	3	1267.64	-0.754679	24.9906	0
	High	DWSHYFK	1	1	1	P05783		0	1.40579e+07	0.001	0.01936		12.32	0.386851	2	982.442	0.246188	39.0861	0
	High	EELLFMK	1	1	1	P05783		0	2.07661e+06	0.005	0.07772		25.74	0.0252018	2	909.475	0.416868	41.8225	0
	High	LASYLDR	2	1	1	P05783		0	5.63845e+07	0.006	0.1031		14.17	0.266063	2	837.446	-1.02219	24.9564	0
P04350	Tubulin beta-4A chain OS=Homo sapiens OX=9606 GN=TUBB4A PE=1 SV=2 - [TBB4A_HUMAN]	748.33	41.67	1	1	13	46	9.17322e+07	444	49.5539	4.88135	0.00516448
	A3	Sequence	# PSMs	# Proteins	# Protein Groups	Protein Group Accessions	Modifications	ΔCn	Area	q-Value	PEP		IonScore	Exp Value	Charge	MH+ [Da]	ΔM [ppm]	RT [min]	# Missed Cleavages
	High	mAATFIGNSTAIQELFK	2	1	1	P04350	M1(Oxidation)	0	3.7318e+07	0	3.253e-10		82.76	7.81254e-08	2	1857.94	-0.344862	57.7818	0
	High	ISEQFTAMFR	4	3	3	P68371;P04350;P07437		0	6.10874e+07	0	2.532e-06		61.1	7.56841e-06	2	1229.6	0.0447062	46.76	0
	High	IMNTFSVVPSPK	2	3	3	P68371;P04350;P07437		0	4.53415e+07	0	5.424e-06		56.69	3.19291e-05	2	1319.7	-0.219029	39.379	0
	High	AVLVDLEPGTMDSVR	2	2	2	P68371;P04350		0	1.14736e+08	0	7.81e-06		49.74	0.000144921	2	1601.81	-9.49424	44.6528	0
	High	TAVcDIPPR	8	3	3	P68371;P04350;P07437	C4(Methylthio)	0	1.25584e+07	0	0.0002533		49.05	8.2138e-05	2	1017.49	-0.248789	32.9519	0
	High	SGPFGQIFRPDNFVFGQSGAGNNWAK	2	3	3	P68371;P04350;P07437		0	3.71674e+07	0	3.459e-09		44.22	0.000548742	3	2798.34	-1.16754	56.5502	0
	High	LTTPTYGDLNHLVSATMSGVTTcLR	4	3	3	P68371;P04350;P07437	C23(Methylthio)	0	2.03793e+07	0	1.19e-07		43.12	0.000809297	2	2697.3	-0.12067	64.4894	0
	High	YLTVAAVFR	2	3	3	P68371;P04350;P07437		0	1.87916e+07	0	0.0003986		41.15	0.00054099	2	1039.6	2.25231	47.1584	0
	High	FPGQLNADLR	4	3	3	P68371;P04350;P07437		0	1.94983e+07	0	0.0005397		35.13	0.00420456	2	1130.59	-1.04148	35.2017	0
	High	ALTVPELTQQMFDAK	3	2	2	P68371;P04350		0	6.73521e+07	0	6.358e-05		32.54	0.00824635	2	1691.87	-0.152655	53.5981	0
	High	NMMAAcDPR	4	3	3	P68371;P04350;P07437	C6(Methylthio)	0	2.89756e+07	0	0.0001657		30.78	0.000833624	2	1054.39	-0.267532	35.2899	0
	High	NSSYFVEWIPNNVK	2	3	3	P68371;P04350;P07437		0	93108242	0	0.0003557		29.59	0.0157707	2	1696.83	-2.48602	53.2204	0
	High	AVLVDLEPGTmDSVR	2	2	2	P68371;P04350	M11(Oxidation)	0	5.63279e+06	0	7.424e-05		25.92	0.0350526	2	1617.81	-1.1263	38.7979	0
	High	LHFFMPGFAPLTSR	5	3	3	P68371;P04350;P07437		0	1.20069e+07	0	1.831e-05		25.01	0.0577366	3	1620.84	-0.0789278	63.0867	0
P62258	14-3-3 protein epsilon OS=Homo sapiens OX=9606 GN=YWHAE PE=1 SV=1 - [1433E_HUMAN]	746.063	70.59	1	13	15	39	1.23006e+08	255	29.1554	4.7417	0.00437858
	A3	Sequence	# PSMs	# Proteins	# Protein Groups	Protein Group Accessions	Modifications	ΔCn	Area	q-Value	PEP		IonScore	Exp Value	Charge	MH+ [Da]	ΔM [ppm]	RT [min]	# Missed Cleavages
	High	AAFDDAIAELDTLSEESYK	4	1	1	P62258		0	3.95759e+07	0	1.71e-11		94.32	3.8647e-09	2	2087.97	-0.237461	58.5859	0
	High	DSTLIMQLLR	4	7	7	P31946;P62258;Q04917;P61981;P31947;P27348;P63104		0	1.74328e+08	0	2.204e-06		55.97	3.30073e-05	2	1189.66	-0.0378506	56.6624	0
	High	YDEMVESMK	2	1	1	P62258		0	2.94692e+07	0	4.543e-05		55.81	7.34781e-06	2	1131.47	0.793086	26.5664	0
	High	DSTLImQLLR	2	7	7	P31946;P62258;Q04917;P61981;P31947;P27348;P63104	M6(Oxidation)	0	3.09617e+06	0	2.822e-06		54.78	5.18949e-05	2	1205.65	-1.99586	53.4269	0
	High	VAGMDVELTVEER	3	1	1	P62258		0	7.90476e+06	0	8.545e-07		54.17	4.65132e-05	2	1447.71	-1.04424	39.114	0
	High	AASDIAMTELPPTHPIR	4	1	1	P62258		0	2.04922e+07	0	3.314e-07		50.68	0.000136383	2	1819.94	-0.40789	35.7328	0
	High	DNLTLWTSDMQGDGEEQNK	2	1	1	P62258		0	2.51142e+07	0	7.026e-08		48.94	6.25455e-05	2	2180.94	-1.20302	44.5431	0
	High	EAAENSLVAYK	2	1	1	P62258		0	2.76263e+07	0	0.000195		46.89	0.00031106	2	1194.6	0.718606	26.4506	0
	High	LIccDILDVLDK	2	1	1	P62258	C3(Methylthio); C4(Methylthio)	0	7.69605e+06	0	1.912e-07		44.19	0.000367729	2	1454.68	-0.459616	65.995	0
	High	mDDREDLVYQAK	2	1	1	P62258	N-Term(Acetyl)	0	8.02224e+07	0	0.000348		40.71	0.000717558	2	1524.7	0.0278551	33.3474	1
	High	HLIPAANTGESK	2	1	1	P62258		0	2.91511e+07	0	0.0001729		38.57	0.00173049	2	1237.65	-1.35598	19.5286	0
	High	QMVETELK	1	1	1	P62258		0	2.06701e+07	0	0.003186		36.85	0.00290186	2	977.497	-0.458891	23.2248	0
	High	EALQDVEDENQ	2	1	1	P62258		0	1.95147e+07	0	0.0002482		28.27	0.00565957	2	1289.55	-0.0941691	24.8849	0
	High	YLAEFATGNDR	2	1	1	P62258		0	2.28361e+07	0	0.003183		21.98	0.0538789	2	1256.59	-0.402526	31.2201	0
	High	NLLSVAYK	4	7	7	P31946;P62258;Q04917;P61981;P31947;P27348;P63104		0	1.14469e+08	0.001	0.01476		25.97	0.0136582	2	907.525	0.331355	35.7891	0
	High	IISSIEQK	1	1	1	P62258		0	1.93596e+07	0.004	0.0636		19.03	0.168785	2	917.529	-1.59793	20.629	0
P00558	Phosphoglycerate kinase 1 OS=Homo sapiens OX=9606 GN=PGK1 PE=1 SV=3 - [PGK1_HUMAN]	737.51	69.78	1	22	22	53	5.17618e+07	417	44.5861	8.104	0.00595038
	A3	Sequence	# PSMs	# Proteins	# Protein Groups	Protein Group Accessions	Modifications	ΔCn	Area	q-Value	PEP		IonScore	Exp Value	Charge	MH+ [Da]	ΔM [ppm]	RT [min]	# Missed Cleavages
	High	ITLPVDFVTADKFDENAK	2	1	1	P00558		0	9.03448e+06	0	2.765e-08		83.81	7.34082e-08	2	2023.04	-1.07308	51.1096	1
	High	TGQATVASGIPAGWMGLDcGPESSK	2	1	1	P00558	C19(Methylthio)	0	1.00581e+07	0	1.128e-09		65.98	2.15758e-06	2	2466.11	-0.206682	54.5433	0
	High	QIVWNGPVGVFEWEAFAR	4	1	1	P00558		0	2.64004e+06	0	6.034e-09		58.21	2.52938e-05	2	2105.06	-0.038463	62.1381	0
	High	AcANPAAGSVILLENLR	4	1	1	P00558	C2(Methylthio)	0	2.92685e+07	0	2.501e-10		55.21	3.99223e-05	2	1757.9	0.319798	56.2051	0
	High	AHSSMVGVNLPQK	4	1	1	P00558		0	3.17738e+07	0	2.821e-05		52.57	7.30422e-05	2	1367.71	-2.18062	26.0329	0
	High	GcITIIGGGDTATccAK	2	1	1	P00558	C2(Methylthio); C14(Methylthio); C15(Methylthio)	0	1.42701e+07	0	3.797e-07		51.49	9.22451e-06	2	1721.69	0.126884	52.6861	0
	High	YSLEPVAVELK	2	1	1	P00558		0	4.08708e+07	0	2.017e-05		47.27	0.000257812	2	1247.69	-0.841487	43.0682	0
	High	VLPGVDALSNI	2	1	1	P00558		0	3.51074e+07	0	0.0001011		42.33	0.000456136	2	1097.62	0.336817	52.4156	0
	High	VLNNMEIGTSLFDEEGAK	2	1	1	P00558		0	7.75643e+07	0	1.118e-06		42.29	0.0008794	2	1966.94	0.400491	49.7117	0
	High	VSHVSTGGGASLELLEGK	4	1	1	P00558		0	2.34744e+07	0	1.065e-05		42.21	0.00088072	2	1740.9	-7.41767	36.0127	0
	High	IQLINNMLDK	2	1	1	P00558		0	2.21859e+07	0	0.0002295		42.04	0.000893997	2	1201.66	0.368866	42.4507	0
	High	ALESPERPFLAILGGAK	4	1	1	P00558		0	3.16958e+07	0	3.061e-05		36.34	0.00243887	2	1768.99	-1.33837	52.8956	0
	High	LGDVYVNDAFGTAHR	3	1	1	P00558		0	3.68502e+07	0	4.782e-05		33.21	0.00599299	2	1634.79	-2.94239	36.7063	0
	High	ALMDEVVK	1	1	1	P00558		0	1.69479e+07	0	0.002473		25.83	0.0404885	2	904.481	0.327741	29.9961	0
	High	ITLPVDFVTADK	2	1	1	P00558		0	1.97746e+07	0	0.001556		19.12	0.160425	2	1318.73	-0.163829	49.7713	0
	High	VNEMIIGGGMAFTFLK	2	1	1	P00558		0	1.26123e+06	0	0.0002534		17.23	0.281959	2	1727.89	1.70284	59.8	0
	High	SVVLMSHLGRPDGVPMPDK	1	1	1	P00558		0	2.9623e+07	0	0.001634		16.28	0.425086	3	2035.05	-0.554809	38.2044	0
	High	ELNYFAK	2	1	1	P00558		0	8.11686e+06	0.001	0.01311		26.03	0.0182105	2	884.452	1.18356	29.9179	0
	High	VDFNVPMK	2	1	1	P00558		0	1.10329e+07	0.001	0.009267		22.73	0.0826669	2	949.481	-0.613894	34.2294	0
	High	DcVGPEVEK	2	1	1	P00558	C2(Methylthio)	0	1.46893e+07	0.001	0.01756		13.62	0.139043	2	1021.43	0.196555	24.1097	0
	High	FcLDNGAK	2	1	1	P00558	C2(Methylthio)	0	1.48761e+07	0.003	0.03766		13.88	0.1105	2	913.391	0.390314	28.6971	0
	High	FHVEEEGK	2	1	1	P00558		0	2.5809e+07	0.006	0.09146		15.28	0.182337	2	974.459	0.731065	18.4322	0
P04075	Fructose-bisphosphate aldolase A OS=Homo sapiens OX=9606 GN=ALDOA PE=1 SV=2 - [ALDOA_HUMAN]	734.314	56.87	1	14	16	44	1.38944e+08	364	39.3953	8.08936	0.00493993
	A3	Sequence	# PSMs	# Proteins	# Protein Groups	Protein Group Accessions	Modifications	ΔCn	Area	q-Value	PEP		IonScore	Exp Value	Charge	MH+ [Da]	ΔM [ppm]	RT [min]	# Missed Cleavages
	High	YTPSGQAGAAASESLFVSNHAY	4	1	1	P04075		0	8.4463e+07	0	2.178e-10		85.82	2.99782e-08	2	2228.02	-1.57137	43.7858	0
	High	IGEHTPSALAIMENANVLAR	4	1	1	P04075		0	9.38695e+07	0	2.569e-09		73.33	8.03611e-07	2	2107.1	-0.384689	51.4856	0
	High	GVVPLAGTNGETTTQGLDGLSER	4	1	1	P04075		0	8.22258e+07	0	3.846e-09		64.42	6.10783e-06	2	2272.14	-1.29474	41.2711	0
	High	ALANSLAcQGK	2	1	1	P04075	C8(Methylthio)	0	1.11631e+08	0	1.41e-06		62.84	7.09795e-06	2	1121.54	-0.322287	28.3568	0
	High	VNPcIGGVILFHETLYQK	4	1	1	P04075	C4(Methylthio)	0	2.78597e+06	0	9.161e-08		58.51	2.50853e-05	2	2077.06	-0.661699	58.7407	0
	High	FSHEEIAMATVTALR	5	1	1	P04075		0	5.30267e+07	0	9.817e-08		58.05	2.20912e-05	2	1675.85	0.240206	43.1358	0
	High	QLLLTADDR	4	1	1	P04075		0	7.2418e+07	0	0.0005691		45.02	0.000448554	2	1044.56	-4.71694	29.6025	0
	High	GILAADESTGSIAK	4	1	1	P04075		0	1.44795e+08	0	1.983e-06		44.76	0.000551422	2	1332.7	0.456347	28.7503	0
	High	LQSIGTENTEENR	2	1	1	P04075		0	9.0794e+07	0	8.061e-06		39.27	0.0011653	2	1490.71	-1.08052	20.6269	0
	High	ELSDIAHR	2	1	1	P04075		0	1.97845e+07	0	0.003536		32.28	0.00505785	2	940.486	1.44526	19.3334	0
	High	YASIcQQNGIVPIVEPEILPDGDHDLKR	1	2	2	P04075;P09972	C5(Methylthio)	0	3.38743e+06	0	3.225e-05		31.13	0.0126814	3	3165.57	-1.38075	54.0578	1
	High	YASIcQQNGIVPIVEPEILPDGDHDLK	2	2	2	P04075;P09972	C5(Methylthio)	0	2.70137e+07	0	7.208e-08		31.05	0.0123675	3	3009.47	-1.55885	56.0529	0
	High	PYQYPALTPEQK	2	1	1	P04075		0	1.60406e+08	0	0.0002387		27.61	0.0281743	2	1434.73	-0.698325	32.1097	0
	High	LQSIGTENTEENRR	1	1	1	P04075		0	6.53763e+07	0	0.001926		20.25	0.134057	3	1646.81	0.134885	19.2831	1
	High	ADDGRPFPQVIK	2	1	1	P04075		0	6.9843e+07	0.001	0.003704		21.46	0.100387	3	1342.71	-1.08453	30.2607	0
	High	KELSDIAHR	1	1	1	P04075		0	2.09825e+06	0.002	0.03052		22.72	0.0505163	2	1068.58	-0.269515	17.9565	1
Q9BQE3	Tubulin alpha-1C chain OS=Homo sapiens OX=9606 GN=TUBA1C PE=1 SV=1 - [TBA1C_HUMAN]	716.71	47.22	1	7	14	48	2.21101e+08	449	49.8635	5.09717	0.00538902
	A3	Sequence	# PSMs	# Proteins	# Protein Groups	Protein Group Accessions	Modifications	ΔCn	Area	q-Value	PEP		IonScore	Exp Value	Charge	MH+ [Da]	ΔM [ppm]	RT [min]	# Missed Cleavages
	High	LISQIVSSITASLR	8	4	2	Q9BQE3;P68366		0	1.19723e+07	0	1.444e-07		67.74	1.37138e-06	2	1487.88	0.0596552	61.6564	0
	High	AVFVDLEPTVIDEVR	4	2	1	Q9BQE3		0	1.34999e+08	0	2.904e-06		63.4	6.53636e-06	2	1701.9	-3.40754	53.4056	0
	High	AVcMLSNTTAVAEAWAR	4	1	1	Q9BQE3	C3(Methylthio)	0	7.16847e+06	0	4.122e-08		60.32	9.01097e-06	2	1839.85	-0.382956	55.2931	0
	High	TIQFVDWcPTGFK	2	1	1	Q9BQE3	C8(Methylthio)	0	2.50365e+07	0	6.158e-07		50.79	8.3785e-05	2	1587.73	0.11833	59.8764	0
	High	EDMAALEK	2	3	2	Q9BQE3;P68366		0	3.88404e+07	0	0.0007148		48.56	8.9162e-05	2	906.425	0.923238	21.9	0
	High	TIGGGDDSFNTFFSETGAGK	4	2	1	Q9BQE3		0	2.26017e+08	0	1.161e-06		46.47	0.000149907	2	2007.89	0.0472014	49.5858	0
	High	IHFPLATYAPVISAEK	4	3	2	Q9BQE3;P68366		0	6.29898e+07	0	3.037e-06		43.47	0.000553229	2	1756.96	0.210218	49.9476	0
	High	EIIDLVLDR	3	2	1	Q9BQE3		0	50750938	0	0.0002211		42.91	0.000537266	2	1085.62	-0.896333	49.357	0
	High	DVNAAIATIK	2	2	1	Q9BQE3		0	5.10374e+07	0	2.997e-05		42.67	0.000635386	2	1015.58	-0.357276	30.7849	0
	High	FDGALNVDLTEFQTNLVPYPR	5	3	2	Q9BQE3;P68366		0	4.17777e+07	0	6.56e-06		39.99	0.00176907	3	2409.21	-0.561509	58.5438	0
	High	FDLMYAK	2	4	3	Q9BQE3;P68366;A6NHL2		0	3.4179e+07	0	0.000309		37.6	0.00095579	2	887.434	0.575912	37.1696	0
	High	AFVHWYVGEGMEEGEFSEAR	2	3	2	Q9BQE3;P68366		0	1.75584e+07	0	2.36e-06		26.33	0.0129209	2	2330.02	-1.36779	50.3595	0
	High	VGINYQPPTVVPGGDLAK	4	3	2	Q9BQE3;P68366		0	3.02285e+08	0	0.001846		22.28	0.0804524	2	1824.99	0.206107	42.4786	0
	High	AYHEQLTVAEITNAcFEPANQMVK	2	1	1	Q9BQE3	C15(Methylthio)	0	2.18718e+07	0	0.0006444		11.09	0.762476	3	2753.26	-3.27864	57.0927	0
P04406	Glyceraldehyde-3-phosphate dehydrogenase OS=Homo sapiens OX=9606 GN=GAPDH PE=1 SV=3 - [G3P_HUMAN]	704.534	42.99	1	9	9	36	3.11753e+08	335	36.0304	8.45557	0.00404176
	A3	Sequence	# PSMs	# Proteins	# Protein Groups	Protein Group Accessions	Modifications	ΔCn	Area	q-Value	PEP		IonScore	Exp Value	Charge	MH+ [Da]	ΔM [ppm]	RT [min]	# Missed Cleavages
	High	LISWYDNEFGYSNR	4	1	1	P04406		0	2.47538e+08	0	1.62e-09		89.31	1.07256e-08	2	1763.8	-0.210765	50.0725	0
	High	LVINGNPITIFQER	4	1	1	P04406		0	1.88235e+08	0	4.219e-08		71.25	9.44867e-07	2	1613.9	0.382692	53.1706	0
	High	VPTANVSVVDLTcR	4	1	1	P04406	C13(Methylthio)	0	2.76955e+08	0	3.697e-08		67.62	2.56878e-06	2	1519.76	0.56718	46.4407	0
	High	WGDAGAEYVVESTGVFTTMEK	9	1	1	P04406		0	6.5534e+07	0	2.43e-06		48.93	0.000127298	2	2277.04	-1.27247	58.9792	0
	High	VVDLMAHMASK	2	1	1	P04406		0	8954082	0	6.656e-05		47.58	0.000159743	2	1201.6	-7.0032	30.612	0
	High	VIHDNFGIVEGLMTTVHAITATQK	5	1	1	P04406		0	6.34546e+06	0	4.806e-12		45.39	0.000455282	3	2595.36	-0.17687	64.9737	0
	High	WGDAGAEYVVESTGVFTTmEK	2	1	1	P04406	M19(Oxidation)	0	3.90159e+06	0	3.308e-06		32.2	0.00521214	2	2293.03	-0.00423756	52.0467	0
	High	GALQNIIPASTGAAK	3	1	1	P04406		0	4.10767e+08	0	0.001177		23.4	0.0500512	2	1411.79	-0.417045	37.4573	0
	High	VIISAPSADAPMFVMGVNHEK	2	1	1	P04406		0	3.52969e+07	0	0.0002164		18.71	0.2113	2	2213.11	-1.66771	47.9202	0
	High	AGAHLQGGAK	1	1	1	P04406		0	279511	0.008	0.1306		10.6	0.709835	2	909.49	-0.516419	13.6046	0
P06576	ATP synthase subunit beta, mitochondrial OS=Homo sapiens OX=9606 GN=ATP5F1B PE=1 SV=3 - [ATPB_HUMAN]	691.81	54.06	1	18	18	37	2.56138e+07	529	56.5246	5.40186	0.00415404
	A3	Sequence	# PSMs	# Proteins	# Protein Groups	Protein Group Accessions	Modifications	ΔCn	Area	q-Value	PEP		IonScore	Exp Value	Charge	MH+ [Da]	ΔM [ppm]	RT [min]	# Missed Cleavages
	High	FTQAGSEVSALLGR	2	1	1	P06576		0	2.35069e+07	0	1.547e-07		80.62	1.40014e-07	2	1435.75	-0.230953	44.4797	0
	High	DQEGQDVLLFIDNIFR	2	1	1	P06576		0	1.10377e+06	0	1.971e-08		65.76	4.035e-06	2	1921.96	-1.71986	65.6955	0
	High	VALTGLTVAEYFR	2	1	1	P06576		0	1.25852e+07	0	7.771e-06		57.7	1.69824e-05	2	1439.79	-2.3719	54.8468	0
	High	TVLIMELINNVAK	3	1	1	P06576		0	8.96013e+06	0	4.374e-07		54.19	3.54391e-05	2	1457.84	-0.113978	61.2003	0
	High	IMNVIGEPIDER	2	1	1	P06576		0	2.74175e+07	0	1.37e-07		52.32	7.53188e-05	2	1385.71	-0.538019	38.2025	0
	High	LVLEVAQHLGESTVR	4	1	1	P06576		0	1.82679e+07	0	3.169e-06		48.75	0.000133352	2	1650.92	-1.26627	40.4813	0
	High	IPSAVGYQPTLATDMGTMQER	4	1	1	P06576		0	1.45444e+07	0	1.081e-05		42.79	0.000625961	2	2266.08	-0.782924	44.3777	0
	High	VVDLLAPYAK	2	1	1	P06576		0	1.08878e+07	0	0.0002262		41.22	0.000770194	2	1088.64	0.435725	42.7194	0
	High	VLDSGAPIK	1	1	1	P06576		0	1.28235e+07	0	0.0001192		40.18	0.000537264	2	899.52	0.870548	21.6239	0
	High	IGLFGGAGVGK	2	1	1	P06576		0	9.58866e+06	0	0.002151		38.13	0.00146894	2	975.563	1.04424	37.8584	0
	High	VALVYGQMNEPPGAR	2	1	1	P06576		0	6.87674e+06	0	4.689e-05		36.7	0.00296108	2	1601.81	-0.56398	34.7434	0
	High	TIAMDGTEGLVR	2	1	1	P06576		0	1.63784e+07	0	5.439e-05		32.27	0.00960539	2	1262.64	-0.542444	33.711	0
	High	SLQDIIAILGMDELSEEDKLTVSR	2	1	1	P06576		0	1.08684e+06	0	1.94e-05		32.19	0.00899883	3	2675.38	-0.356323	64.7943	1
	High	AIAELGIYPAVDPLDSTSR	2	1	1	P06576		0	2.38293e+07	0	0.0001631		27.03	0.0354693	2	1988.03	-0.662534	52.5088	0
	High	IPVGPETLGR	2	1	1	P06576		0	2.55945e+07	0	0.001037		15.74	0.162678	2	1038.59	-1.17093	29.7268	0
	High	EGNDLYHEMIESGVINLK	1	1	1	P06576		0	1.68323e+07	0	0.0001575		15.69	0.361497	3	2061	0.32645	52.4461	0
	High	GSITSVQAIYVPADDLTDPAPATTFAHLDATTVLSR	1	1	1	P06576		0	1.26989e+07	0	3.273e-05		13.57	0.714255	3	3714.89	-0.313966	56.799	0
	High	FLSQPFQVAEVFTGHMGK	1	1	1	P06576		0	1.05474e+07	0	0.0002706		13.28	0.777675	3	2023.01	-0.440691	56.5454	0
P08238	Heat shock protein HSP 90-beta OS=Homo sapiens OX=9606 GN=HSP90AB1 PE=1 SV=4 - [HS90B_HUMAN]	686.487	34.81	1	13	22	46	1.37221e+08	724	83.2121	5.03369	0.00516448
	A3	Sequence	# PSMs	# Proteins	# Protein Groups	Protein Group Accessions	Modifications	ΔCn	Area	q-Value	PEP		IonScore	Exp Value	Charge	MH+ [Da]	ΔM [ppm]	RT [min]	# Missed Cleavages
	High	ELISNASDALDK	2	2	2	P14625;P08238		0	9.59504e+07	0	2.297e-06		72.76	6.17058e-07	2	1275.64	-1.82092	29.8202	0
	High	NPDDITQEEYGEFYK	2	1	1	P08238		0	1.00272e+08	0	2.978e-10		71.02	3.55805e-07	2	1847.8	-0.344725	39.7225	0
	High	ADLINNLGTIAK	3	2	2	P08238;P07900		0	1.41134e+08	0	1.195e-06		56.43	2.65049e-05	2	1242.71	-0.231468	41.0648	0
	High	DNSTMGYMMAK	2	1	1	P08238		0	3.98007e+06	0	1.284e-05		53.86	9.04529e-06	2	1248.51	0.272177	30.5775	0
	High	EDQTEYLEER	2	3	3	Q58FF6;P08238;P07900		0	1.2867e+08	0	0.0001196		53.82	2.22e-05	2	1311.57	-0.719729	25.1605	0
	High	IEDVGSDEEDDSGKDK	3	1	1	P08238		0	3.83255e+06	0	1.869e-05		49.72	3.5731e-05	2	1737.73	-0.513236	17.6119	1
	High	IEDVGSDEEDDSGK	2	1	1	P08238		0	6.15196e+06	0	1.078e-06		48.32	2.94463e-05	2	1494.61	-0.533944	18.6846	0
	High	GFEVVYMTEPIDEYcVQQLK	5	1	1	P08238	C15(Methylthio)	0	1.62942e+07	0	4.997e-07		47.21	0.000157789	2	2437.11	-0.26601	61.0688	0
	High	SLTNDWEDHLAVK	4	2	2	P08238;P07900		0	6.16185e+07	0	3.45e-06		39.34	0.00133292	2	1527.74	-0.82474	39.5753	0
	High	cLELFSELAEDKENYK	3	1	1	P08238	C1(Methylthio)	0	1.5041e+07	0	1.264e-05		36.42	0.00175586	2	1976.9	-1.27315	53.139	1
	High	YIDQEELNK	1	2	2	P08238;P07900		0	141857335	0	0.0002316		35.27	0.003566	2	1151.56	0.298585	22.7211	0
	High	SIYYITGESK	2	1	1	P08238		0	2.5621e+07	0	0.0003954		33.51	0.00545929	2	1160.58	-0.508391	30.7885	0
	High	EGLELPEDEEEK	2	3	3	Q58FF6;P08238;P07900		0	5.88077e+07	0	9.384e-05		32.12	0.00359051	2	1416.64	-1.03289	30.7252	0
	High	HLEINPDHPIVETLR	2	1	1	P08238		0	8.84418e+06	0	1.457e-05		29.74	0.0142267	2	1782.95	0.053507	36.4853	0
	High	IDIIPNPQER	2	1	1	P08238		0	2.93476e+07	0	0.0003908		27.53	0.0212808	2	1194.65	-1.75267	34.4702	0
	High	YESLTDPSK	2	3	3	Q58FF6;P08238;P07900		0	8.04752e+07	0	0.001505		26.69	0.0247504	2	1039.49	0.516862	21.0064	0
	High	VFIMDScDELIPEYLNFIR	2	1	1	P08238	C7(Methylthio)	0	1.04922e+06	0	1.278e-05		17.91	0.216014	2	2363.11	-0.216848	65.783	0
	High	IEDVGSDEEDDSGKDKK	1	1	1	P08238		0	3.04524e+06	0.001	0.008469		28.03	0.0110179	3	1865.83	0.267549	16.4781	2
	High	EQVANSAFVER	1	1	1	P08238		0	3.41072e+07	0.001	0.01482		12.52	0.789258	2	1249.62	-0.656756	24.9353	0
	High	RAPFDLFENK	1	1	1	P08238		0	1.65808e+07	0.002	0.02413		28.35	0.0196663	2	1236.64	0.923441	41.559	1
	High	HNDDEQYAWESSAGGSFTVR	1	2	2	P08238;P07900		0	0	0.002	0.02676		12.21	0.321628	3	2255.96	0.0204756	40.5954	0
	High	EGLELPEDEEEKK	1	3	3	Q58FF6;P08238;P07900		0	1.26179e+07	0.003	0.04595		17.01	0.199067	2	1544.73	-0.709715	27.024	1
P78371	T-complex protein 1 subunit beta OS=Homo sapiens OX=9606 GN=CCT2 PE=1 SV=4 - [TCPB_HUMAN]	684.736	46.36	1	17	17	38	1.4854e+07	535	57.4521	6.45557	0.00426631
	A3	Sequence	# PSMs	# Proteins	# Protein Groups	Protein Group Accessions	Modifications	ΔCn	Area	q-Value	PEP		IonScore	Exp Value	Charge	MH+ [Da]	ΔM [ppm]	RT [min]	# Missed Cleavages
	High	QVLLSAAEAAEVILR	3	1	1	P78371		0	2.75279e+06	0	3.886e-09		82.49	4.8191e-08	2	1582.92	-0.117508	62.0998	0
	High	LIEEVMIGEDK	2	1	1	P78371		0	7.74506e+06	0	1.67e-06		56.51	2.68029e-05	2	1275.65	-0.261379	37.0724	0
	High	GATQQILDEAER	2	1	1	P78371		0	1.13622e+07	0	1.719e-06		54.74	3.77705e-05	2	1330.66	-0.706586	31.4581	0
	High	QDLMNIAGTTLSSK	2	1	1	P78371		0	1.53417e+07	0	6.796e-06		47.51	0.000243951	2	1478.75	0.00637277	41.6128	0
	High	ILIANTGMDTDK	2	1	1	P78371		0	9.32933e+06	0	2.304e-06		47.43	0.000318063	2	1291.65	-1.04244	29.5483	0
	High	LGGSLADSYLDEGFLLDK	2	1	1	P78371		0	6.28344e+06	0	1.43e-06		42.83	0.000771368	2	1912.95	-0.0827776	56.1486	0
	High	LALVTGGEIASTFDHPELVK	3	1	1	P78371		0	1.45084e+07	0	4.495e-07		41.95	0.000979734	2	2097.12	-1.11695	52.1859	0
	High	LAVEAVLR	1	1	1	P78371		0	2.1083e+06	0	0.0004021		41.14	0.000303807	2	870.538	-2.76108	34.5571	0
	High	MLPTIIADNAGYDSADLVAQLR	4	1	1	P78371		0	7.14221e+06	0	4.772e-07		40.42	0.00167493	2	2347.2	-0.314018	57.0413	0
	High	AAHSEGNTTAGLDMR	3	1	1	P78371		0	6.77224e+06	0	2.088e-05		38.54	0.000818759	2	1530.7	-0.65791	20.7553	0
	High	EGTIGDMAILGITESFQVK	2	1	1	P78371		0	3.32915e+06	0	4.207e-07		37.77	0.00287428	2	2009.03	0.0444721	60.6415	0
	High	aSLSLAPVNIFK	2	1	1	P78371	N-Term(Acetyl)	0	1.24765e+07	0	0.0002656		36.81	0.00232421	2	1301.75	-0.125125	58.8299	0
	High	EALLSSAVDHGSDEVK	1	1	1	P78371		0	1.47118e+07	0	0.000341		31.18	0.00918305	2	1656.8	-5.92964	29.6099	0
	High	VQDDEVGDGTTSVTVLAAELLR	4	1	1	P78371		0	5.17738e+06	0	0.0002117		29.69	0.0173449	3	2288.16	-0.16661	59.7616	0
	High	EAVAMESYAK	2	1	1	P78371		0	5.02783e+06	0	0.00236		25.4	0.0243701	2	1098.51	0.849025	24.4647	0
	High	SLHDALcVLAQTVK	2	1	1	P78371	C7(Methylthio)	0	2.30564e+06	0	0.0001512		21.28	0.103518	3	1543.8	0.112773	55.4551	0
	High	EAESLIAK	1	1	1	P78371		0	1.56409e+06	0.008	0.1255		23.75	0.0586158	2	860.473	0.470229	20.8225	0
P08758	Annexin A5 OS=Homo sapiens OX=9606 GN=ANXA5 PE=1 SV=2 - [ANXA5_HUMAN]	682.99	50.63	1	13	13	27	1.35508e+07	320	35.9144	5.04639	0.00303132
	A3	Sequence	# PSMs	# Proteins	# Protein Groups	Protein Group Accessions	Modifications	ΔCn	Area	q-Value	PEP		IonScore	Exp Value	Charge	MH+ [Da]	ΔM [ppm]	RT [min]	# Missed Cleavages
	High	ETSGNLEQLLLAVVK	3	1	1	P08758		0	1.00992e+07	0	3.494e-10		92.21	6.52274e-09	2	1613.91	-1.06203	63.5652	0
	High	YMTISGFQIEETIDR	2	1	1	P08758		0	9.99603e+06	0	3.843e-09		82.21	7.84532e-08	2	1802.86	0.0462643	52.4613	0
	High	DPDAGIDEAQVEQDAQALFQAGELK	3	1	1	P08758		0	1.06327e+07	0	8.826e-10		63.16	6.47299e-06	2	2658.25	-0.0428905	58.5393	0
	High	GLGTDEESILTLLTSR	2	1	1	P08758		0	1.0752e+07	0	3.207e-08		61.54	1.27314e-05	2	1704.9	-0.551942	60.2748	0
	High	GAGTDDHTLIR	2	1	1	P08758		0	8.96537e+06	0	6.277e-05		50.35	9.27184e-05	2	1155.57	-0.604669	19.7003	0
	High	SIPAYLAETLYYAMK	3	1	1	P08758		0	3.1798e+06	0	1.206e-06		48.22	0.000262903	2	1733.88	0.400637	61.8566	0
	High	VLTEIIASR	2	1	1	P08758		0	1.06518e+07	0	0.0001733		47.14	0.000178707	2	1001.6	-0.584096	31.9953	0
	High	NFATSLYSMIK	2	1	1	P08758		0	5.84186e+06	0	2.568e-05		42.76	0.000672673	2	1274.64	-0.603041	56.3154	0
	High	GTVTDFPGFDER	2	1	1	P08758		0	1.64999e+07	0	3.024e-05		32.72	0.00414287	2	1340.61	-1.03844	39.6291	0
	High	SEIDLFNIR	2	1	1	P08758		0	1.34004e+07	0	0.001931		27.43	0.0315352	2	1106.58	0.157977	49.2909	0
	High	LYDAYELK	1	1	1	P08758		0	5.14555e+06	0.002	0.02062		25.34	0.0233932	2	1014.51	-2.82024	32.3665	0
	High	FITIFGTR	2	1	1	P08758		0	3.42271e+06	0.002	0.03084		23.12	0.0307143	2	954.541	0.305826	46.9964	0
	High	QEISAAFK	1	1	1	P08758		0	0	0.003	0.03865		15.02	0.286445	2	893.472	-0.599607	25.114	0
O75369	Filamin-B OS=Homo sapiens OX=9606 GN=FLNB PE=1 SV=2 - [FLNB_HUMAN]	677.932	17.95	1	28	33	52	8.99644e+06	2602	277.99	5.73193	0.0058381
	A3	Sequence	# PSMs	# Proteins	# Protein Groups	Protein Group Accessions	Modifications	ΔCn	Area	q-Value	PEP		IonScore	Exp Value	Charge	MH+ [Da]	ΔM [ppm]	RT [min]	# Missed Cleavages
	High	TFEMSDFIVDTR	2	1	1	O75369		0	2.91963e+06	0	2.958e-07		65.96	1.82529e-06	2	1460.67	-1.18799	51.8817	0
	High	YMIGVTYGGDDIPLSPYR	2	1	1	O75369		0	3.93874e+06	0	5.428e-09		58.12	1.8115e-05	2	2016.97	-0.691994	52.173	0
	High	LGSAADFLLDISETDLSSLTASIK	2	1	1	O75369		0	359222	0	5.616e-09		55.12	5.26013e-05	2	2467.28	0.309191	65.779	0
	High	IGNLQTDLSDGLR	2	1	1	O75369		0	6.13077e+06	0	1.277e-05		50.7	0.000127671	2	1401.73	-0.419257	39.8102	0
	High	EAGAGGLSIAVEGPSK	1	1	1	O75369		0	3.86843e+06	0	4.487e-07		48.43	0.000185896	2	1442.75	-0.971285	32.5011	0
	High	LIALLEVLSQK	2	2	2	P21333;O75369		0	5.59959e+06	0	1.752e-05		46.29	7.28386e-05	2	1226.77	0.0888144	58.9722	0
	High	QMQLENVSVALEFLDR	2	2	2	P21333;O75369		0	2.64531e+06	0	4.492e-07		45.82	0.000434618	2	1891.96	0.246587	59.9265	0
	High	AGPGTLSVTIEGPSK	1	1	1	O75369		0	1.41418e+06	0	8.658e-06		43.57	0.000613161	2	1413.75	-3.27463	33.6201	0
	High	MDGTYAcSYTPVK	1	1	1	O75369	C7(Methylthio)	0	3.20668e+06	0	2.258e-05		40.23	0.000208652	2	1481.61	-2.45335	38.7628	0
	High	DGTYAVTYIPDK	1	1	1	O75369		0	4.10347e+06	0	0.0001903		39.09	0.00131326	2	1342.65	-1.39942	34.887	0
	High	VFGPGIEGK	1	1	1	O75369		0	2.89945e+06	0	9.752e-05		37.43	0.00246679	2	903.493	-0.523241	26.2075	0
	High	VNIGQGSHPQK	2	1	1	O75369		0	2.60496e+06	0	9.103e-06		35.89	0.00369702	2	1164.61	-0.466684	16.1813	0
	High	SPFEVQVGPEAGMQK	1	1	1	O75369		0	6784426	0	0.0001299		31.08	0.00865611	2	1603.78	-0.729497	37.8105	0
	High	SPFTVGVAAPLDLSK	2	1	1	O75369		0	5.39755e+06	0	1.555e-05		30.11	0.0142348	2	1501.82	-0.767419	48.5867	0
	High	cLATGPGIASTVK	1	1	1	O75369	C1(Methylthio)	0	3.93882e+06	0	9.635e-05		29.96	0.017561	2	1263.64	-0.788654	32.0077	0
	High	VTEAEIVPMGK	1	1	1	O75369		0	3.13845e+06	0	0.0005458		29.78	0.0137807	2	1173.62	-1.46085	30.4215	0
	High	VDIQTEDLEDGTcK	2	1	1	O75369	C13(Methylthio)	0	9.7764e+06	0	2.168e-05		29.75	0.00450183	2	1611.69	0.6366	35.8505	0
	High	GAGTGGLGLTVEGPcEAK	2	1	1	O75369	C15(Methylthio)	0	4.60416e+06	0	1.43e-05		29.65	0.0106225	2	1662.78	0.568104	43.4546	0
	High	LLGWIQNK	2	2	2	P21333;O75369		0	2.9432e+06	0	0.002856		29.4	0.013089	2	971.567	-0.704373	40.09	0
	High	APLNVQFNSPLPGDAVK	2	1	1	O75369		0	8.2867e+06	0	2.259e-05		26.86	0.0263761	2	1766.94	0.207152	44.9206	0
	High	IFAQDGEGQR	2	1	1	O75369		0	4.66027e+06	0	0.0002719		26.78	0.0204647	2	1120.54	-0.0783229	20.0424	0
	High	VMYTPMAPGNYLISVK	1	1	1	O75369		0	2.86594e+06	0	0.0008729		26.78	0.0309594	2	1783.91	-1.18813	51.7287	0
	High	IPYLPITNFNQNWQDGK	2	1	1	O75369		0	2.70572e+06	0	5.07e-05		24.65	0.0616982	2	2048.02	-0.925374	54.9823	0
	High	LVSPGSANETSSILVESVTR	2	1	1	O75369		0	5.94775e+06	0	7.371e-05		23.45	0.0779452	2	2046.07	-0.583202	45.1039	0
	High	NTVELLVEDK	2	1	1	O75369		0	0	0	0.003386		18.21	0.197821	2	1159.62	-2.01759	35.5744	0
	High	GEAGVPAEFSIWTR	1	1	1	O75369		0	3.44529e+06	0	0.001012		15.79	0.357223	2	1519.75	-0.94767	51.6697	0
	High	GAGIGGLGITVEGPSESK	2	1	1	O75369		0	7.30408e+06	0	0.000302		13.8	0.569027	2	1628.85	-0.402143	40.7616	0
	High	FNDEHIPESPYLVPVIAPSDDAR	1	1	1	O75369		0	8.9262e+06	0	0.0004319		11.33	1.25891	3	2581.26	-0.507845	49.6041	0
	High	VSYFPTVPGVYIVSTK	2	1	1	O75369		0	2.91614e+06	0	0.0005991		10.43	1.29973	2	1756.95	-0.612406	54.1086	0
	High	VLFASQEIPASPFR	1	1	1	O75369		0	6.54369e+06	0	0.000581		10.28	1.52354	2	1561.84	0.122108	50.0147	0
	High	DLAEDAPWK	2	2	2	P21333;O75369		0	3.14182e+06	0.001	0.004607		25.44	0.0202889	2	1044.5	-0.262377	36.2733	0
	High	MDcQETPEGYK	1	1	1	O75369	C3(Methylthio)	0	4.08609e+06	0.001	0.007582		20.61	0.00866902	2	1346.5	-1.84373	27.8918	0
	High	IQQNTFTR	1	2	2	P21333;O75369		0	2.66995e+06	0.003	0.041		13.28	0.535679	2	1007.53	-0.906934	20.1112	0
P13796	Plastin-2 OS=Homo sapiens OX=9606 GN=LCP1 PE=1 SV=6 - [PLSL_HUMAN]	672.829	56.3	1	22	26	50	3.13055e+07	627	70.2439	5.42725	0.00561356
	A3	Sequence	# PSMs	# Proteins	# Protein Groups	Protein Group Accessions	Modifications	ΔCn	Area	q-Value	PEP		IonScore	Exp Value	Charge	MH+ [Da]	ΔM [ppm]	RT [min]	# Missed Cleavages
	High	FSLVGIGGQDLNEGNR	2	1	1	P13796		0	3.04236e+07	0	3.396e-07		64.41	4.9265e-06	2	1675.84	-0.0119052	45.1381	0
	High	VNDDIIVNWVNETLR	4	1	1	P13796		0	9.83593e+06	0	7.219e-10		63.8	5.87786e-06	2	1799.93	-0.114951	60.8659	0
	High	AEcMLQQAER	2	1	1	P13796	C3(Methylthio)	0	1.21118e+07	0	1.826e-05		58.6	4.27919e-06	2	1224.52	-0.0219906	30.5537	0
	High	LSPEELLLR	2	3	2	P13797;P13796		0	1.74009e+07	0	1.826e-05		51.99	3.57313e-05	2	1069.62	-1.32234	47.3336	0
	High	NEALIALLR	2	1	1	P13796		0	1.277e+07	0	2.147e-05		48.8	5.20711e-05	2	1012.62	0.508401	49.2383	0
	High	NWMNSLGVNPR	2	1	1	P13796		0	1.22012e+07	0	3.233e-06		40.88	0.000788002	2	1287.63	-0.90215	43.7661	0
	High	EGESLEDLMK	2	1	1	P13796		0	6.68817e+06	0	0.0008279		39.23	0.000794002	2	1150.53	-3.91753	39.9489	0
	High	AYYHLLEQVAPK	2	1	1	P13796		0	7.37084e+06	0	5.469e-07		38.19	0.00243487	3	1431.76	-2.71788	38.5783	0
	High	QFVTATDVVR	2	1	1	P13796		0	1.99664e+07	0	0.0002493		37.9	0.00252191	2	1135.61	-0.00704302	30.9778	0
	High	HVIPMNPNTNDLFNAVGDGIVLcK	2	1	1	P13796	C23(Methylthio)	0	9.43962e+06	0	1.788e-06		37.71	0.00254998	3	2627.28	0.34693	58.9156	0
	High	GSVSDEEMMELR	1	1	1	P13796		0	1.04616e+07	0	7.374e-06		35.25	0.00117923	2	1382.59	-0.37655	34.6662	0
	High	VYALPEDLVEVNPK	2	1	1	P13796		0	2.57784e+07	0	5.035e-05		33.97	0.0052714	2	1585.85	-1.34372	46.7489	0
	High	ISTSLPVLDLIDAIQPGSINYDLLK	2	1	1	P13796		0	3.15929e+06	0	5.545e-06		33.55	0.00406245	2	2698.49	0.294164	65.2072	0
	High	EITENLMATGDLDQDGR	2	1	1	P13796		0	2.12599e+07	0	8.541e-05		33.43	0.00369962	2	1877.85	-0.319404	38.9051	0
	High	VDTDGNGYISFNELNDLFK	2	1	1	P13796		0	5.80893e+06	0	1.165e-06		33.13	0.00649354	2	2161.01	-0.292087	59.2932	0
	High	YAFVNWINK	2	2	2	P13797;P13796		0	8.93104e+06	0	6.75e-05		32.09	0.00621106	2	1154.6	-0.360946	48.6595	0
	High	WANYHLENAGcNK	2	1	1	P13796	C11(Methylthio)	0	1.13667e+07	0	2.666e-05		29.35	0.004007	2	1565.66	0.207596	32.5964	0
	High	ISFDEFIK	2	1	1	P13796		0	1.9377e+07	0	0.0003499		29.21	0.0109154	2	998.519	-0.83128	49.0105	0
	High	MINLSVPDTIDER	1	2	2	P13797;P13796		0	2.65281e+07	0	0.0001457		22.23	0.0816832	2	1502.75	0.162079	44.0045	0
	High	YPALHKPENQDIDWGALEGETR	2	1	1	P13796		0	1.64196e+07	0	2.341e-05		12.49	0.856729	3	2539.22	-0.222124	41.5235	0
	High	EGIcAIGGTSEQSSVGTQHSYSEEEK	2	1	1	P13796	C4(Methylthio)	0	3.69648e+07	0	0.000524		12.21	0.219428	3	2759.18	-0.229951	35.7229	0
	High	ALENDPDcR	2	2	2	P13797;P13796	C8(Methylthio)	0	1.56247e+07	0.001	0.01462		36.7	0.000363454	2	1078.43	0.891184	22.4477	0
	High	IGNFSTDIK	2	1	1	P13796		0	1.50951e+07	0.001	0.01474		31.62	0.00946897	2	994.515	-5.52141	29.6258	0
	High	AAcLPLPGYR	2	1	1	P13796	C3(Methylthio)	0	1.36734e+07	0.001	0.00628		20.48	0.109235	2	1106.55	1.80959	44.2836	0
	High	TENLNDDEKLNNAK	1	1	1	P13796		0	4.36544e+06	0.001	0.01145		17.23	0.170311	2	1617.77	-0.307588	19.1008	1
	High	VPVDWNR	1	1	1	P13796		0	8.68173e+06	0.003	0.04233		14.64	0.20957	2	885.458	-0.0237894	26.0185	0
P13639	Elongation factor 2 OS=Homo sapiens OX=9606 GN=EEF2 PE=1 SV=4 - [EF2_HUMAN]	666.301	40.33	1	28	29	54	2.39985e+07	858	95.277	6.82959	0.00606265
	A3	Sequence	# PSMs	# Proteins	# Protein Groups	Protein Group Accessions	Modifications	ΔCn	Area	q-Value	PEP		IonScore	Exp Value	Charge	MH+ [Da]	ΔM [ppm]	RT [min]	# Missed Cleavages
	High	IWcFGPDGTGPNILTDITK	2	1	1	P13639	C3(Methylthio)	0	5.49718e+06	0	8.952e-09		80.11	1.33574e-07	2	2094	0.0703954	61.8636	0
	High	VNFTVDQIR	2	1	1	P13639		0	1.7229e+07	0	8.702e-06		54.79	5.0448e-05	2	1091.58	-0.0303369	35.2625	0
	High	AYLPVNESFGFTADLR	2	1	1	P13639		0	1.18511e+07	0	2.099e-07		51.35	0.000100763	2	1799.9	0.236022	53.9616	0
	High	TFcQLILDPIFK	2	1	1	P13639	C3(Methylthio)	0	1.81323e+06	0	2.771e-06		48.43	0.000185178	2	1483.77	-0.970986	65.999	0
	High	ETVSEESNVLcLSK	2	1	1	P13639	C11(Methylthio)	0	2.10258e+07	0	1.306e-06		48.38	0.000112539	2	1583.73	0.213096	39.8994	0
	High	ALLELQLEPEELYQTFQR	3	1	1	P13639		0	8.07034e+06	0	1.205e-09		45.96	0.000422099	2	2220.15	-0.407678	59.864	0
	High	DSVVAGFQWATK	2	1	1	P13639		0	7.66552e+06	0	2.863e-05		45.01	0.000405418	2	1308.65	-5.01302	45.2082	0
	High	YEWDVAEAR	2	1	1	P13639		0	1.49331e+07	0	3.078e-05		42.42	0.000343678	2	1138.52	-0.541609	35.4928	0
	High	QFAEMYVAK	2	1	1	P13639		0	7.3092e+06	0	0.001295		41.25	0.000547423	2	1086.53	-0.931104	31.823	0
	High	cLYASVLTAQPR	2	1	1	P13639	C1(Methylthio)	0	1.36907e+07	0	0.0001206		38.1	0.00180437	2	1367.68	-0.070556	43.3385	0
	High	EGIPALDNFLDKL	4	1	1	P13639		0	1.28029e+07	0	2.492e-05		37.11	0.00267487	2	1444.77	-0.298619	61.8846	1
	High	GEGQLGPAER	2	1	1	P13639		0	18190169	0	0.0009834		36.72	0.00141521	2	1013.5	-0.1462	18.601	0
	High	YVEPIEDVPcGNIVGLVGVDQFLVK	2	1	1	P13639	C10(Methylthio)	0	5.54773e+06	0	1.813e-05		32.45	0.00924386	2	2748.4	-0.655671	64.7603	0
	High	VFDAIMNFK	2	1	1	P13639		0	8.28011e+06	0	0.001737		30.43	0.00819688	2	1084.55	0.419646	47.0516	0
	High	VFSGLVSTGLK	2	1	1	P13639		0	1.60507e+07	0	3.828e-05		26.07	0.0148303	2	1107.64	-0.528071	38.4611	0
	High	STAISLFYELSENDLNFIK	2	1	1	P13639		0	4.21938e+06	0	0.0001282		25.15	0.0504062	2	2204.11	1.05632	64.5297	0
	High	IMGPNYTPGK	2	1	1	P13639		0	1.8846e+07	0	0.002908		25.12	0.0426039	2	1077.54	0.613965	24.499	0
	High	STLTDSLVcK	2	1	1	P13639	C9(Methylthio)	0	1.20284e+07	0	0.001197		24.61	0.0328642	2	1112.53	-0.33989	38.9375	0
	High	DLEEDHAcIPIK	2	1	1	P13639	C8(Methylthio)	0	1.04765e+07	0	0.0002732		23.37	0.0317577	2	1428.65	-0.515767	37.5403	0
	High	EDLYLKPIQR	1	1	1	P13639		0	2.66685e+06	0	0.0005635		22.57	0.0550583	3	1274.71	-0.90975	30.3551	0
	High	WLPAGDALLQMITIHLPSPVTAQK	1	1	1	P13639		0	1.48271e+06	0	0.000662		17.16	0.18654	3	2600.43	0.569002	65.4201	0
	High	cELLYEGPPDDEAAMGIK	1	1	1	P13639	C1(Methylthio)	0	32123780	0	0.0006229		11.98	0.304257	2	1996.87	-0.309417	50.0768	0
	High	FSVSPVVR	2	1	1	P13639		0	1.0763e+07	0.001	0.01064		24.64	0.0267975	2	890.51	0.178345	30.5108	0
	High	EGALcEENMR	1	1	1	P13639	C5(Methylthio)	0	1.22138e+07	0.001	0.007467		12.61	0.0740174	2	1197.47	-0.295915	29.7731	0
	High	GGGQIIPTAR	2	2	2	Q15029;P13639		0	15425354	0.002	0.03036		27.82	0.0104074	2	969.549	0.874853	23.5571	0
	High	YFDPANGK	2	1	1	P13639		0	8.19698e+06	0.003	0.04214		18.65	0.0791458	2	911.426	0.309064	22.5177	0
	High	SDPVVSYR	1	1	1	P13639		0	5826279	0.004	0.0661		21.83	0.0705356	2	922.464	1.36333	22.4496	0
	High	EGIPALDNFLDK	1	1	1	P13639		0	4.01405e+06	0.004	0.05523		12.83	0.729673	2	1331.68	-0.259679	53.5047	0
	High	KEDLYLKPIQR	1	1	1	P13639		0	4.75649e+06	0.005	0.08133		23.55	0.045261	3	1402.8	-0.347573	26.3544	1
O43707	Alpha-actinin-4 OS=Homo sapiens OX=9606 GN=ACTN4 PE=1 SV=2 - [ACTN4_HUMAN]	664.898	38.09	1	16	27	52	2.54242e+07	911	104.788	5.43994	0.0058381
	A3	Sequence	# PSMs	# Proteins	# Protein Groups	Protein Group Accessions	Modifications	ΔCn	Area	q-Value	PEP		IonScore	Exp Value	Charge	MH+ [Da]	ΔM [ppm]	RT [min]	# Missed Cleavages
	High	VGWEQLLTTIAR	3	2	2	P12814;O43707		0	1.02641e+07	0	1.017e-07		69.11	1.60795e-06	2	1386.77	-0.577125	60.3385	0
	High	LASDLLEWIR	2	2	2	P12814;O43707		0	1.87451e+07	0	1.428e-06		60.95	1.10485e-05	2	1215.67	-0.799961	57.2783	0
	High	FAIQDISVEETSAK	2	2	2	P12814;O43707		0	2.58059e+07	0	2.354e-08		55.9	3.39292e-05	2	1537.78	0.609272	40.6584	0
	High	cQLEINFNTLQTK	2	2	2	P12814;O43707	C1(Methylthio)	0	3.33606e+06	0	1.462e-07		51.96	8.31018e-05	2	1597.77	-0.333432	51.0112	0
	High	GYEEWLLNEIR	2	2	2	P12814;O43707		0	9.43735e+06	0	4.461e-05		49.57	0.000164508	2	1421.71	-0.537035	55.7372	0
	High	TINEVENQILTR	2	2	2	P12814;O43707		0	2.58312e+07	0	1.724e-06		46.96	0.000303065	2	1429.76	0.158632	37.9753	0
	High	DYETATLSDIK	2	1	1	O43707		0	5.79276e+06	0	5.336e-05		45.54	0.000279254	2	1255.6	-1.36833	34.7498	0
	High	NFITAEELR	2	1	1	O43707		0	8.41239e+06	0	0.0005212		44.5	0.000507383	2	1092.57	-2.72205	37.3751	0
	High	LSGSNPYTTVTPQIINSK	2	1	1	O43707		0	1.45409e+07	0	6.07e-06		41.12	0.00118606	2	1920	-1.82787	38.5805	0
	High	ALDFIASK	2	2	2	P12814;O43707		0	5.40211e+06	0	9.685e-05		39.44	0.000841844	2	864.482	-0.352733	32.9415	0
	High	QFASQANVVGPWIQTK	1	1	1	O43707		0	7.69128e+06	0	3.47e-05		35.74	0.00414697	2	1773.93	-1.26742	45.6133	0
	High	DLLLDPAWEK	2	2	2	P12814;O43707		0	1.13735e+07	0	0.002706		35.19	0.00320853	2	1199.63	-0.15883	48.769	0
	High	AcLISLGYDVENDR	2	1	1	O43707	C2(Methylthio)	0	4.4787e+06	0	1.372e-05		31.35	0.00538626	2	1613.73	0.62604	51.8742	0
	High	VLAVNQENEHLMEDYEK	2	1	1	O43707		0	2.16474e+07	0	2.685e-06		31.22	0.00868356	2	2060.96	-0.430677	35.2809	0
	High	ETTDTDTADQVIASFK	2	1	1	O43707		0	2.46355e+07	0	3.789e-06		30.55	0.00911886	2	1741.81	-0.0411244	44.4776	0
	High	MAPYQGPDAVPGALDYK	2	1	1	O43707		0	2.26733e+07	0	0.0002762		29.84	0.013436	2	1792.86	0.782559	40.2548	0
	High	RDHALLEEQSK	4	1	1	O43707		0	4.81815e+06	0	0.0005932		28.93	0.0163121	3	1325.68	0.176244	17.5622	1
	High	QLEAIDQLHLEYAK	2	1	1	O43707		0	4.78409e+06	0	4.858e-05		26	0.0366735	2	1670.87	-1.06341	42.6759	0
	High	EGLLLWcQR	2	2	2	P12814;O43707	C7(Methylthio)	0	2.34497e+06	0	0.002054		21.4	0.088019	2	1163.57	-0.260021	56.1979	0
	High	LVSIGAEEIVDGNAK	2	1	1	O43707		0	1.42765e+07	0	2.591e-05		20.49	0.11479	2	1514.81	-0.531982	38.497	0
	High	DGLAFNALIHR	1	1	1	O43707		0	2.52001e+06	0	0.0005409		17.2	0.207695	2	1226.66	0.114839	43.2187	0
	High	GISQEQMQEFR	2	1	1	O43707		0	1.37275e+07	0	0.002248		15.08	0.246812	2	1352.62	-2.88859	30.3444	0
	High	MVSDINNGWQHLEQAEK	2	1	1	O43707		0	3.19115e+06	0	0.001155		15.06	0.369588	2	1998.93	-0.979991	38.7017	0
	High	ELPPDQAEYcIAR	2	2	2	P12814;O43707	C10(Methylthio)	0	1.57536e+07	0	0.003242		11.27	0.395618	2	1550.7	-0.970944	40.2573	0
	High	HEAFESDLAAHQDR	1	2	2	P12814;O43707		0	7.84083e+06	0	0.001432		10.62	0.619878	3	1625.73	-0.1634	22.8385	0
	High	EAILAIHK	1	1	1	O43707		0	3.99918e+06	0.001	0.005894		22.53	0.0150787	2	894.541	-0.287737	23.7669	0
	High	MLDAEDIVNTARPDEK	1	1	1	O43707		0	9.29629e+06	0.001	0.009118		11.02	1.05556	2	1816.87	-1.33269	38.5655	0
P13645	Keratin, type I cytoskeletal 10 OS=Homo sapiens OX=9606 GN=KRT10 PE=1 SV=6 - [K1C10_HUMAN]	664.271	41.95	1	16	17	30	3.49207e+07	584	58.7917	5.21143	-
	A3	Sequence	# PSMs	# Proteins	# Protein Groups	Protein Group Accessions	Modifications	ΔCn	Area	q-Value	PEP		IonScore	Exp Value	Charge	MH+ [Da]	ΔM [ppm]	RT [min]	# Missed Cleavages
	High	GSLGGGFSSGGFSGGSFSR	2	1	1	P13645		0	8.13226e+06	0	2.021e-08		79.32	7.2509e-08	2	1707.76	-4.48383	40.7088	0
	High	GSSGGGcFGGSSGGYGGLGGFGGGSFR	2	1	1	P13645	C7(Methylthio)	0	4.47259e+06	0	3.77e-11		70.67	1.71408e-07	2	2331.95	-1.04313	51.4454	0
	High	ALEESNYELEGK	2	1	1	P13645		0	3.80726e+07	0	1.682e-07		62.83	4.48227e-06	2	1381.65	-1.48775	27.1946	0
	High	LENEIQTYR	2	1	1	P13645		0	2.51814e+07	0	1.615e-06		62.08	8.23857e-06	2	1165.58	-0.459157	25.4403	0
	High	SQYEQLAEQNR	2	1	1	P13645		0	3.58871e+07	0	4.52e-08		61.51	6.25091e-06	2	1365.64	-0.477305	23.3891	0
	High	AETEcQNTEYQQLLDIK	1	1	1	P13645	C5(Methylthio)	0	30802560	0	2.866e-07		55.31	2.64998e-05	2	2071.93	0.84782	48.9422	0
	High	QSLEASLAETEGR	2	1	1	P13645		0	1.18559e+07	0	3.46e-06		48.22	0.000183053	2	1390.68	-0.947933	33.0317	0
	High	NQILNLTTDNANILLQIDNAR	3	1	1	P13645		0	5.5888e+06	0	2.229e-07		43.96	0.000616749	2	2367.26	-0.729693	57.0573	0
	High	VTMQNLNDR	1	2	2	P02533;P13645		0	1.99387e+07	0	0.0001857		43.79	0.000534823	2	1090.53	1.14885	21.9521	0
	High	YENEVALR	2	1	1	P13645		0	1.58767e+07	0	0.0003285		40.19	0.0012635	2	993.501	0.825118	23.454	0
	High	NVQALEIELQSQLALK	1	1	1	P13645		0	1.45135e+06	0	4.327e-05		32.72	0.00526546	2	1797.01	-0.0428609	55.9558	0
	High	VLDELTLTK	2	1	1	P13645		0	6017612	0	0.0008058		31.11	0.00727994	2	1031.6	-0.272626	34.7456	0
	High	SLLEGEGSSGGGGR	2	1	1	P13645		0	2.2946e+07	0	0.0006646		29.97	0.00931412	2	1262.6	3.29055	21.569	0
	High	ELTTEIDNNIEQISSYK	2	1	1	P13645		0	1.69351e+07	0	1.39e-05		26.81	0.0309547	2	1996.97	-0.380004	49.0351	0
	High	NVSTGDVNVEMNAAPGVDLTQLLNNMR	1	1	1	P13645		0	5.70385e+06	0	0.0002927		14.29	0.63679	3	2872.4	0.997357	59.91	0
	High	SEITELR	2	1	1	P13645		0	7.5541e+06	0.001	0.00671		31.19	0.00954209	2	847.452	0.506078	23.5704	0
	High	DAEAWFNEK	1	1	1	P13645		0	4.37239e+06	0.001	0.005302		22.27	0.0337967	2	1109.49	0.590194	37.1887	0
P11021	Endoplasmic reticulum chaperone BiP OS=Homo sapiens OX=9606 GN=HSPA5 PE=1 SV=2 - [BIP_HUMAN]	655.337	39.91	1	17	19	43	1.08616e+08	654	72.2884	5.16064	0.00482766
	A3	Sequence	# PSMs	# Proteins	# Protein Groups	Protein Group Accessions	Modifications	ΔCn	Area	q-Value	PEP		IonScore	Exp Value	Charge	MH+ [Da]	ΔM [ppm]	RT [min]	# Missed Cleavages
	High	TFAPEEISAMVLTK	4	1	1	P11021		0	2.64638e+07	0	2.076e-10		70.03	1.39036e-06	2	1536.8	0.24341	53.3397	0
	High	IEIESFYEGEDFSETLTR	2	1	1	P11021		0	1.38644e+07	0	1.458e-09		60.72	9.06533e-06	2	2164.99	-1.21097	53.7191	0
	High	SQIFSTASDNQPTVTIK	2	1	1	P11021		0	6.96294e+07	0	4.868e-08		58.22	2.28251e-05	2	1836.93	0.0186122	36.1757	0
	High	NQLTSNPENTVFDAK	1	1	1	P11021		0	5.37263e+07	0	3.184e-07		56.8	2.831e-05	2	1677.8	-4.9548	33.6229	0
	High	FEELNMDLFR	2	1	1	P11021		0	1.5475e+07	0	9.693e-07		54.47	3.03682e-05	2	1313.62	-0.0677027	53.2814	0
	High	VEIIANDQGNR	5	3	3	P0DMV8;P11021;P11142		0	1.33773e+08	0	1.362e-06		50.91	0.000116373	2	1228.63	0.495193	21.8887	0
	High	IINEPTAAAIAYGLDK	5	2	2	P11021;P11142		0	1.22447e+08	0	4.314e-07		48.67	0.000200351	2	1659.89	-0.502756	45.5984	0
	High	KSDIDEIVLVGGSTR	1	1	1	P11021		0	4.60756e+06	0	5.515e-06		45.04	0.000496626	2	1588.85	-1.68252	37.6504	1
	High	ELEEIVQPIISK	2	1	1	P11021		0	4.29714e+07	0	9.435e-06		43.01	0.000445031	2	1397.79	-0.0497089	42.9048	0
	High	DAGTIAGLNVMR	2	1	1	P11021		0	1.81349e+07	0	1.86e-06		39.92	0.00146168	2	1217.63	-0.18112	39.0918	0
	High	VYEGERPLTK	2	1	1	P11021		0	1.85432e+07	0	0.0006844		38.98	0.00188446	2	1191.64	-0.0796814	19.2266	0
	High	NELESYAYSLK	2	1	1	P11021		0	1.33906e+07	0	0.0003095		38.78	0.00135745	2	1316.63	-1.58592	40.0754	0
	High	IEWLESHQDADIEDFK	4	1	1	P11021		0	2.38333e+07	0	1.764e-05		22.99	0.0489784	3	1974.91	-0.771179	45.2899	0
	High	LYGSAGPPPTGEEDTAEKDEL	1	1	1	P11021		0	3.19956e+07	0	0.001097		21.43	0.0669088	2	2175.99	0.47003	33.1736	1
	High	VTHAVVTVPAYFNDAQR	3	1	1	P11021		0	2.00922e+07	0	0.0005624		18.93	0.213017	3	1887.97	-0.234637	38.9073	0
	High	ITPSYVAFTPEGER	1	1	1	P11021		0	3.90605e+07	0	0.002565		13.86	0.505714	2	1566.78	-1.37463	39.4972	0
	High	VLEDSDLK	1	1	1	P11021		0	1.35187e+07	0.001	0.01274		30.09	0.0120967	2	918.479	0.853579	21.115	0
	High	ETAEAYLGK	1	1	1	P11021		0	1.0435e+07	0.001	0.01806		21.64	0.0616939	2	981.49	1.27004	23.9612	0
	High	TKPYIQVDIGGGQTK	2	1	1	P11021		0	1.04707e+07	0.001	0.007629		13.57	0.630742	2	1604.86	0.0723934	31.0427	0
P18206	Vinculin OS=Homo sapiens OX=9606 GN=VCL PE=1 SV=4 - [VINC_HUMAN]	653.722	29.98	1	26	26	45	1.80584e+07	1134	123.722	5.65576	0.00505221
	A3	Sequence	# PSMs	# Proteins	# Protein Groups	Protein Group Accessions	Modifications	ΔCn	Area	q-Value	PEP		IonScore	Exp Value	Charge	MH+ [Da]	ΔM [ppm]	RT [min]	# Missed Cleavages
	High	AQQVSQGLDVLTAK	2	1	1	P18206		0	1.56642e+07	0	4.891e-08		69.69	1.47674e-06	2	1457.79	-1.39283	35.0463	0
	High	MSAEINEIIR	2	1	1	P18206		0	4.93875e+06	0	1.059e-06		65.76	3.98191e-06	2	1175.61	-0.222117	38.1504	0
	High	DPSASPGDAGEQAIR	2	1	1	P18206		0	2.2851e+07	0	1.251e-07		54.39	3.45719e-05	2	1470.68	-0.551688	21.8375	0
	High	MQEAMTQEVSDVFSDTTTPIK	2	1	1	P18206		0	6.51178e+06	0	3.562e-09		53.32	4.63258e-05	2	2358.08	-0.327278	51.5088	0
	High	MLGQMTDQVADLR	2	1	1	P18206		0	1.56402e+07	0	6.56e-07		47.32	0.000265982	2	1477.72	0.78643	39.6828	0
	High	STVEGIQASVK	2	1	1	P18206		0	5.88113e+06	0	4.201e-05		44.47	0.000523405	2	1118.61	0.363952	23.8275	0
	High	AVAGNISDPGLQK	2	1	1	P18206		0	1.4944e+07	0	4.916e-05		43.9	0.000393122	2	1269.68	-2.07901	24.1815	0
	High	MTGLVDEAIDTK	2	1	1	P18206		0	9.98686e+06	0	7.957e-05		43	0.000694144	2	1292.64	-1.33363	35.0798	0
	High	QVATALQNLQTK	2	1	1	P18206		0	1.17816e+07	0	4.739e-05		42.38	0.000737072	2	1314.74	0.0587168	29.1526	0
	High	TNLLQVcER	2	1	1	P18206	C7(Methylthio)	0	3.61012e+06	0	4.718e-05		40.9	0.00111764	2	1121.54	-1.29294	47.6194	0
	High	VLQLTSWDEDAWASK	2	1	1	P18206		0	8.49576e+06	0	3.328e-06		39.13	0.00166165	2	1748.85	-0.502714	51.8035	0
	High	ALASQLQDSLK	2	1	1	P18206		0	7.03853e+06	0	0.0005245		37.62	0.00302718	2	1173.65	0.169818	32.9562	0
	High	ETVQTTEDQILK	2	1	1	P18206		0	1.56598e+07	0	8.721e-05		34.06	0.00571298	2	1404.72	0.612561	30.0578	0
	High	AIPDLTAPVAAVQAAVSNLVR	3	1	1	P18206		0	1.43455e+06	0	3.826e-10		33.29	0.00283632	2	2076.18	-0.274369	65.0785	0
	High	NPGNQAAYEHFETMK	1	1	1	P18206		0	5.1802e+06	0	2.921e-05		32.87	0.00353745	2	1736.77	-1.22963	30.3686	0
	High	IAELcDDPK	2	1	1	P18206	C5(Methylthio)	0	4.46766e+06	0	0.0005355		32.56	0.00257901	2	1049.46	-0.786874	30.1704	0
	High	SLGEISALTSK	2	1	1	P18206		0	9.94564e+06	0	0.0001881		31.82	0.00900991	2	1105.61	-1.49902	35.214	0
	High	MALLMAEMSR	1	1	1	P18206		0	3.09543e+06	0	0.0001863		25.84	0.0294495	2	1152.56	-0.4676	44.9752	0
	High	ELLPVLISAMK	2	1	1	P18206		0	4.7978e+06	0	0.00179		19.39	0.0932148	2	1213.72	-1.06474	56.1352	0
	High	GILSGTSDLLLTFDEAEVR	1	1	1	P18206		0	4.67415e+06	0	0.0003348		18.5	0.245782	2	2036.05	-0.35786	60.6136	0
	High	TNISDEESEQATEMLVHNAQNLMQSVK	1	1	1	P18206		0	8.5509e+06	0	0.0003203		12.4	0.632984	3	3046.41	-0.723034	59.086	0
	High	NQWIDNVEK	1	1	1	P18206		0	4.67227e+06	0.001	0.01241		30.71	0.00840689	2	1145.56	0.345909	31.1672	0
	High	LLAVAATAPPDAPNR	1	1	1	P18206		0	3.44755e+06	0.001	0.00381		15.98	0.305341	2	1476.81	-2.67835	30.7522	0
	High	LLAVAATAPPDAPNREEVFDER	1	1	1	P18206		0	1.20472e+07	0.001	0.008472		13.44	0.878621	3	2381.21	-1.77339	39.4433	1
	High	IPTISTQLK	2	1	1	P18206		0	4.57655e+06	0.002	0.03475		18.59	0.117603	2	1000.6	-0.868939	31.4178	0
	High	NQGIEEALK	1	1	1	P18206		0	6.1519e+06	0.004	0.06611		15.94	0.211387	2	1001.53	0.650774	24.6743	0
P31947	14-3-3 protein sigma OS=Homo sapiens OX=9606 GN=SFN PE=1 SV=1 - [1433S_HUMAN]	637.869	50	1	9	11	36	1.32706e+08	248	27.7567	4.7417	0.00404176
	A3	Sequence	# PSMs	# Proteins	# Protein Groups	Protein Group Accessions	Modifications	ΔCn	Area	q-Value	PEP		IonScore	Exp Value	Charge	MH+ [Da]	ΔM [ppm]	RT [min]	# Missed Cleavages
	High	YLAEVATGDDK	2	1	1	P31947		0	1.09321e+08	0	4.239e-08		64.85	3.20794e-06	2	1181.57	0.221642	23.5302	0
	High	SAYQEAMDISK	2	1	1	P31947		0	1.05351e+08	0	2.469e-06		61.63	5.08431e-06	2	1242.57	0.633682	30.0643	0
	High	DSTLIMQLLR	4	7	7	P31946;P62258;Q04917;P61981;P31947;P27348;P63104		0	1.74328e+08	0	2.204e-06		55.97	3.30073e-05	2	1189.66	-0.0378506	56.6624	0
	High	TTFDEAMADLHTLSEDSYK	4	1	1	P31947		0	6.25377e+07	0	6.825e-09		55.74	2.01348e-05	2	2173.96	0.013319	54.3469	0
	High	DSTLImQLLR	2	7	7	P31946;P62258;Q04917;P61981;P31947;P27348;P63104	M6(Oxidation)	0	3.09617e+06	0	2.822e-06		54.78	5.18949e-05	2	1205.65	-1.99586	53.4269	0
	High	GEELScEER	3	1	1	P31947	C6(Methylthio)	0	5.61581e+07	0	1.91e-05		49.66	1.29772e-05	2	1097.42	0.364157	25.2883	0
	High	YEDMAAFMK	2	1	1	P31947		0	2.62053e+07	0	4.096e-06		49.36	3.36045e-05	2	1105.47	0.501987	39.3145	0
	High	SNEEGSEEKGPEVR	7	1	1	P31947		0	8.06378e+07	0	6.004e-05		44.77	0.000188386	2	1546.7	-0.319349	16.5178	1
	High	EKVETELQGVcDTVLGLLDSHLIK	1	1	1	P31947	C11(Methylthio)	0	164019	0	2.185e-07		43.28	0.000761228	3	2685.38	-0.730315	67.4908	1
	High	VETELQGVcDTVLGLLDSHLIK	3	1	1	P31947	C9(Methylthio)	0	1.06901e+06	0	1.178e-06		38.24	0.00217454	2	2428.25	0.227106	67.4279	0
	High	TTFDEAmADLHTLSEDSYK	1	1	1	P31947	M7(Oxidation)	0	1.43495e+06	0	0.0003188		14.18	0.263542	2	2189.95	0.105547	44.0947	0
	High	NLLSVAYK	4	7	7	P31946;P62258;Q04917;P61981;P31947;P27348;P63104		0	1.14469e+08	0.001	0.01476		25.97	0.0136582	2	907.525	0.331355	35.7891	0
	High	EMPPTNPIR	1	1	1	P31947		0	1.28087e+07	0.004	0.06498		19.58	0.101892	2	1054.54	0.376175	23.5685	0
P15311	Ezrin OS=Homo sapiens OX=9606 GN=EZR PE=1 SV=4 - [EZRI_HUMAN]	636.976	33.45	1	11	17	36	2.49534e+07	586	69.3697	6.26514	0.00404176
	A3	Sequence	# PSMs	# Proteins	# Protein Groups	Protein Group Accessions	Modifications	ΔCn	Area	q-Value	PEP		IonScore	Exp Value	Charge	MH+ [Da]	ΔM [ppm]	RT [min]	# Missed Cleavages
	High	QLLTLSSELSQAR	2	1	1	P15311		0	1.7429e+07	0	8.496e-10		100.2	1.36086e-09	2	1445.8	-0.55316	43.0492	0
	High	SQEQLAAELAEYTAK	3	1	1	P15311		0	1.97804e+07	0	1.132e-09		80.59	1.292e-07	2	1651.81	-1.6203	45.3175	0
	High	GTDLWLGVDALGLNIYEK	2	1	1	P15311		0	2.4924e+06	0	2.954e-11		73.09	7.82998e-07	2	1977.03	0.0117412	60.6442	0
	High	APDFVFYAPR	2	3	3	P15311;P26038;P35241		0	2.50377e+07	0	1.535e-05		46.85	0.000224094	2	1182.59	-0.710229	46.0056	0
	High	FYPEDVAEELIQDITQK	4	1	1	P15311		0	3.53289e+06	0	1.667e-08		45.87	0.00036235	2	2038	0.131184	64.9713	0
	High	KPDTIEVQQMK	2	3	3	P15311;P26038;P35241		0	1.22233e+07	0	0.0001484		41.48	0.00115217	2	1316.69	1.19195	21.9616	0
	High	LFFLQVK	2	3	3	P15311;P26038;P35241		0	4.92052e+06	0	9.18e-05		34.76	0.00168768	2	894.544	-0.756048	49.9772	0
	High	IAQDLEMYGINYFEIK	2	1	1	P15311		0	1.08239e+07	0	2.983e-06		34.36	0.0054416	2	1946.96	-0.78658	56.9043	0
	High	ELSEQIQR	2	1	1	P15311		0	8.31495e+06	0	0.002316		32.51	0.00684479	2	1002.52	-0.507364	20.3241	0
	High	IALLEEAR	1	1	1	P15311		0	5159674	0	0.0001881		30.38	0.00558894	2	914.531	0.883916	32.1743	0
	High	IGFPWSEIR	2	3	3	P15311;P26038;P35241		0	30042236	0	0.0002181		29.26	0.0181423	2	1104.58	-0.372763	52.864	0
	High	DNAMLEYLK	2	1	1	P15311		0	4.20175e+06	0	0.002774		20.77	0.079984	2	1096.53	0.0913121	42.9216	0
	High	SGYLSSER	2	1	1	P15311		0	2.70505e+06	0	0.002737		20.75	0.0538493	2	898.427	0.0556202	19.8825	0
	High	EGILSDEIYcPPETAVLLGSYAVQAK	2	1	1	P15311	C10(Methylthio)	0	5.79462e+06	0	0.0009123		17.6	0.291082	3	2812.38	0.169999	62.129	0
	High	THNDIIHNENMR	2	1	1	P15311		0	9.3745e+06	0	0.0007697		12.83	0.422168	3	1493.69	-0.123187	19.2708	0
	High	FVIKPIDK	2	3	3	P15311;P26038;P35241		0	1.59486e+07	0.001	0.004401		32.25	0.00345484	2	959.591	-1.04528	27.8673	0
	High	RKPDTIEVQQMK	2	3	3	P15311;P26038;P35241		0	8.04818e+06	0.001	0.01718		25.15	0.0441436	2	1472.79	-0.540263	20.2728	1
P49368	T-complex protein 1 subunit gamma OS=Homo sapiens OX=9606 GN=CCT3 PE=1 SV=4 - [TCPG_HUMAN]	618.65	41.1	1	17	17	30	1.17672e+07	545	60.4953	6.49365	0.00336814
	A3	Sequence	# PSMs	# Proteins	# Protein Groups	Protein Group Accessions	Modifications	ΔCn	Area	q-Value	PEP		IonScore	Exp Value	Charge	MH+ [Da]	ΔM [ppm]	RT [min]	# Missed Cleavages
	High	TAVETAVLLLR	2	1	1	P49368		0	1.45945e+07	0	8.662e-07		70.93	6.25607e-07	2	1185.72	0.454933	48.9175	0
	High	IGDEYFTFITDcK	2	1	1	P49368	C12(Methylthio)	0	3.70559e+06	0	1.975e-08		69.49	4.72334e-07	2	1597.69	-1.38812	58.0388	0
	High	MLLDPMGGIVMTNDGNAILR	2	1	1	P49368		0	7.21936e+06	0	5.585e-09		57.65	2.73147e-05	2	2131.07	-0.630492	57.5325	0
	High	IVLLDSSLEYK	2	1	1	P49368		0	1.05737e+07	0	5.032e-06		49.12	0.000118788	2	1279.71	-0.411431	44.4263	0
	High	AVAQALEVIPR	2	1	1	P49368		0	1.01335e+07	0	1.046e-05		47.41	9.62223e-05	2	1166.69	-0.413991	38.8806	0
	High	TLIQNcGASTIR	2	1	1	P49368	C6(Methylthio)	0	6.67805e+06	0	2.065e-05		45.77	0.000381384	2	1322.65	-0.559137	37.4614	0
	High	ELGIWEPLAVK	2	1	1	P49368		0	6.97533e+06	0	9.934e-05		45.29	0.000220372	2	1254.71	0.0612769	52.578	0
	High	MVQFEENGR	2	1	1	P49368		0	3.82175e+06	0	7.15e-05		43.14	0.000349408	2	1109.5	-0.475394	24.7569	0
	High	ALDDMISTLK	2	1	1	P49368		0	5.96854e+06	0	8.38e-05		37.98	0.0022689	2	1106.58	-0.800956	41.9915	0
	High	ISIPVDISDSDMMLNIINSSITTK	2	1	1	P49368		0	1.70291e+06	0	2.594e-05		31.97	0.0114995	2	2607.32	-0.835099	63.3218	0
	High	AMTGVEQWPYR	1	1	1	P49368		0	4.64182e+06	0	0.001583		23.67	0.0438127	2	1337.63	-0.879989	38.6362	0
	High	NLQDAMQVcR	2	1	1	P49368	C9(Methylthio)	0	3.86845e+06	0	0.001227		22.49	0.0321273	2	1223.53	-0.112614	41.9124	0
	High	GISDLAQHYLMR	1	1	1	P49368		0	3.59275e+06	0	0.0004869		19.84	0.151479	2	1403.71	-1.33491	45.1549	0
	High	EDDVGTGAGLLEIK	2	1	1	P49368		0	4.39468e+06	0	0.001548		17.05	0.277125	2	1416.72	-0.706262	40.9405	0
	High	NVLLDPQLVPGGGASEMAVAHALTEK	1	1	1	P49368		0	5.05376e+06	0	0.0005774		15.28	0.474373	3	2617.37	0.00473878	54.3852	0
	High	EIQVQHPAAK	2	1	1	P49368		0	5.4343e+06	0.001	0.004027		29.25	0.0175898	2	1120.61	0.0251763	17.3328	0
	High	IVSRPEELREDDVGTGAGLLEIK	1	1	1	P49368		0	7.93143e+06	0.003	0.03903		17.17	0.266695	3	2496.33	-1.42282	41.3004	1
Q00610	Clathrin heavy chain 1 OS=Homo sapiens OX=9606 GN=CLTC PE=1 SV=5 - [CLH1_HUMAN]	611.422	26.51	1	31	31	50	1.10404e+07	1675	191.493	5.69385	0.00561356
	A3	Sequence	# PSMs	# Proteins	# Protein Groups	Protein Group Accessions	Modifications	ΔCn	Area	q-Value	PEP		IonScore	Exp Value	Charge	MH+ [Da]	ΔM [ppm]	RT [min]	# Missed Cleavages
	High	NLQNLLILTAIK	2	1	1	Q00610		0	4.08118e+06	0	4.644e-07		67.72	3.21184e-07	2	1353.84	-1.79456	57.8566	0
	High	cNEPAVWSQLAK	2	1	1	Q00610	C1(Methylthio)	0	9.75616e+06	0	3.724e-06		51.53	5.73004e-05	2	1391.64	-0.863787	43.8311	0
	High	TSIDAYDNFDNISLAQR	2	1	1	Q00610		0	1.1505e+07	0	1.129e-06		47.07	0.000226768	2	1942.91	-1.23039	46.2285	0
	High	LEcSEELGDLVK	2	1	1	Q00610	C3(Methylthio)	0	3.47e+06	0	2.817e-07		43.13	0.000420742	2	1380.64	0.526948	49.9748	0
	High	VIQcFAETGQVQK	2	1	1	Q00610	C4(Methylthio)	0	7.31019e+06	0	2.65e-06		40.69	0.000934145	2	1496.73	1.07236	39.0596	0
	High	VGYTPDWIFLLR	1	1	1	Q00610		0	2.45462e+06	0	1.235e-05		37.73	0.00223468	2	1479.8	-0.436259	61.6001	0
	High	IYIDSNNNPER	2	1	1	Q00610		0	1.12397e+07	0	0.0001179		37.66	0.00174824	2	1334.63	-0.0680709	22.8566	0
	High	GQFSTDELVAEVEK	1	1	1	Q00610		0	8.23159e+06	0	1.939e-06		37.37	0.00237285	2	1551.75	-0.27569	44.96	0
	High	LLYNNVSNFGR	2	1	1	Q00610		0	7.86238e+06	0	4.989e-05		36.11	0.00306133	2	1296.67	-1.56033	37.3444	0
	High	AFMTADLPNELIELLEK	2	1	1	Q00610		0	2.26536e+06	0	1.509e-08		35.31	0.00596245	2	1947.01	-0.0623902	64.9763	0
	High	LTDQLPLIIVcDR	2	1	1	Q00610	C11(Methylthio)	0	2.75554e+06	0	6.83e-06		35.25	0.00440344	2	1544.82	-0.644983	59.2982	0
	High	SVDPTLALSVYLR	2	1	1	Q00610		0	1.50838e+06	0	5.682e-05		34.82	0.00382347	2	1433.8	-0.38171	54.6865	0
	High	TLQIFNIEMK	2	1	1	Q00610		0	4589921	0	0.0002261		33.01	0.00610042	2	1236.67	-0.323853	51.8579	0
	High	FNALFAQGNYSEAAK	2	1	1	Q00610		0	1.03766e+07	0	0.0002225		31.85	0.00692318	2	1630.79	-0.226376	39.7326	0
	High	RPLIDQVVQTALSETQDPEEVSVTVK	2	1	1	Q00610		0	6.60012e+06	0	8.497e-07		31.04	0.0117663	3	2881.51	-1.93665	57.859	0
	High	SVNESLNNLFITEEDYQALR	2	1	1	Q00610		0	3.55141e+06	0	4.462e-06		30.57	0.0146898	2	2355.15	-0.350674	55.0414	0
	High	VGEQAQVVIIDMNDPSNPIR	2	1	1	Q00610		0	4.10316e+06	0	1.603e-05		29.54	0.0176765	2	2195.11	-2.23118	47.915	0
	High	ESYVETELIFALAK	1	1	1	Q00610		0	0	0	0.0001148		27.61	0.0230596	2	1612.85	-1.11042	58.2464	0
	High	LLLPWLEAR	1	1	1	Q00610		0	5.50267e+06	0	0.0001558		25.32	0.0123381	2	1110.67	-0.0103665	57.8543	0
	High	RPISADSAIMNPASK	2	1	1	Q00610		0	7.47459e+06	0	5.565e-05		25.14	0.0416427	2	1557.8	-0.453331	26.0307	0
	High	FQEHLQLQNLGINPANIGFSTLTMESDK	2	1	1	Q00610		0	3.44652e+06	0	3.035e-08		24.75	0.0587864	3	3145.56	-0.523648	57.2364	0
	High	LASTLVHLGEYQAAVDGAR	1	1	1	Q00610		0	7.39052e+06	0	6.152e-05		23.1	0.0734668	3	1971.03	0.997426	42.399	0
	High	IHEGcEEPATHNALAK	2	1	1	Q00610	C5(Methylthio)	0	9.20423e+06	0	0.000534		20.26	0.0824153	2	1765.8	0.436254	22.3649	0
	High	VANVELYYR	1	1	1	Q00610		0	2.5468e+06	0	0.003365		14.64	0.403681	2	1126.59	0.864724	33.8526	0
	High	LHIIEVGTPPTGNQPFPK	2	1	1	Q00610		0	7.60263e+06	0	0.0003791		13.98	0.593918	2	1945.06	0.431869	41.2334	0
	High	GQcDLELINVcNENSLFK	1	1	1	Q00610	C3(Methylthio); C11(Methylthio)	0	1.23728e+06	0	0.001786		11.63	0.474077	2	2130.93	0.178217	61.5514	0
	High	IVLDNSVFSEHR	1	1	1	Q00610		0	4.74308e+06	0	0.00115		11.08	0.951393	2	1415.73	-1.19337	35.6874	0
	High	AHTMTDDVTFWK	1	1	1	Q00610		0	3.52838e+06	0.001	0.008705		12.89	0.372682	2	1451.66	-0.111773	40.1576	0
	High	NNRPSEGPLQTR	1	1	1	Q00610		0	8.09151e+06	0.003	0.04383		19.76	0.159051	2	1368.7	-0.436968	18.3436	0
	High	YIQAAcK	1	1	1	Q00610	C6(Methylthio)	0	2.37067e+06	0.004	0.05727		14.23	0.113272	2	842.39	0.29917	22.8446	0
	High	VMEYINR	1	1	1	Q00610		0	2.34466e+06	0.004	0.06574		10.86	0.705502	2	924.462	1.3212	24.6952	0
P68032	Actin, alpha cardiac muscle 1 OS=Homo sapiens OX=9606 GN=ACTC1 PE=1 SV=1 - [ACTC_HUMAN]	599.056	24.93	2	1	8	54	5.63471e+08	377	41.9919	5.38916	0.00606265
	A3	Sequence	# PSMs	# Proteins	# Protein Groups	Protein Group Accessions	Modifications	ΔCn	Area	q-Value	PEP		IonScore	Exp Value	Charge	MH+ [Da]	ΔM [ppm]	RT [min]	# Missed Cleavages
	High	AGFAGDDAPR	3	4	3	P60709;P68032;P63261		0	4.38329e+08	0	7.436e-06		56.09	1.13177e-05	2	976.448	-0.500549	20.3546	0
	High	DSYVGDEAQSK	7	4	3	P60709;P68032;P63261		0	3.28889e+08	0	4.109e-06		51.68	3.53186e-05	2	1198.52	0.393298	18.6493	0
	High	EITALAPSTMK	8	4	3	P60709;P68032;P63261		0	4.10976e+08	0	0.0008437		51.49	0.000113178	2	1161.62	0.529307	30.0502	0
	High	DLTDYLMK	2	5	4	Q562R1;P60709;P68032;P63261		0	1.51071e+08	0	0.001391		39.96	0.000681246	2	998.487	0.635737	43.6096	0
	High	SYELPDGQVITIGNER	11	5	4	Q562R1;P60709;P68032;P63261		0	8.41108e+08	0	3.514e-05		38.3	0.00235918	2	1790.89	-0.122882	49.1916	0
	High	IWHHTFYNELR	2	4	3	P60709;P68032;P63261		0	9.24442e+06	0	1.708e-06		37.2	0.00229608	3	1515.75	0.0325881	60.5569	0
	High	EITALAPSTmK	2	4	3	P60709;P68032;P63261	M10(Oxidation)	0	3.59113e+07	0	0.0007023		35.04	0.00454326	2	1177.61	-0.239121	24.3429	0
	High	HQGVMVGMGQK	4	5	4	Q562R1;P60709;P68032;P63261		0	4.04943e+08	0	5.188e-05		33.09	0.00429544	2	1171.57	-0.0331003	21.0591	0
	High	HQGVMVGmGQK	5	5	4	Q562R1;P60709;P68032;P63261	M8(Oxidation)	0	2.49863e+07	0	0.003625		30.77	0.00665836	2	1187.57	-0.479143	16.5137	0
	High	YPIEHGIITNWDDMEK	6	2	1	P68032		0	4.08246e+08	0	3.446e-05		17.4	0.158314	3	1960.91	0.198788	43.3627	0
	High	YPIEHGIITNWDDmEK	2	2	1	P68032	M14(Oxidation)	0	2.43145e+07	0	0.001788		11.31	0.624966	3	1976.9	-1.79999	38.5632	0
	High	DLTDYLmK	2	5	4	Q562R1;P60709;P68032;P63261	M7(Oxidation)	0	1.0937e+07	0.001	0.003988		28.35	0.00979659	2	1014.48	0.163213	36.8176	0
P34932	Heat shock 70 kDa protein 4 OS=Homo sapiens OX=9606 GN=HSPA4 PE=1 SV=4 - [HSP74_HUMAN]	590.828	32.02	1	18	18	30	1.28456e+07	840	94.2712	5.18604	0.00336814
	A3	Sequence	# PSMs	# Proteins	# Protein Groups	Protein Group Accessions	Modifications	ΔCn	Area	q-Value	PEP		IonScore	Exp Value	Charge	MH+ [Da]	ΔM [ppm]	RT [min]	# Missed Cleavages
	High	AESEEMETSQAGSK	2	1	1	P34932		0	8.88636e+06	0	5.932e-10		89.14	3.83982e-09	2	1483.62	-0.918276	16.8222	0
	High	LMNETTAVALAYGIYK	2	1	1	P34932		0	4.86381e+06	0	1.441e-07		77.07	2.572e-07	2	1757.9	-8.44169	52.8294	0
	High	NFTTEQVTAMLLSK	2	1	1	P34932		0	3.22299e+06	0	1.314e-07		61.24	1.07482e-05	2	1582.81	-0.519959	53.7285	0
	High	FLEMcNDLLAR	2	1	1	P34932	C5(Methylthio)	0	3.12915e+06	0	9.723e-07		54.2	2.2051e-05	2	1370.63	-0.0655594	58.1012	0
	High	STNEAMEWMNNK	2	1	1	P34932		0	4.47944e+06	0	2.162e-05		50.09	1.86103e-05	2	1454.6	-0.350712	36.2686	0
	High	EFSITDVVPYPISLR	2	1	1	P34932		0	4.18095e+06	0	1.786e-05		39.28	0.00171146	2	1735.93	-0.714738	59.0296	0
	High	LEDTENWLYEDGEDQPK	2	1	1	P34932		0	6.55524e+06	0	2.805e-07		38.9	0.000579712	2	2080.9	-0.366555	41.4608	0
	High	AGGIETIANEYSDR	2	1	1	P34932		0	5.05526e+06	0	0.00092		36.01	0.00210513	2	1495.69	-9.18979	36.6546	0
	High	SNLAYDIVQLPTGLTGIK	2	1	1	P34932		0	6.26645e+06	0	2.732e-06		35.73	0.00264628	2	1903.05	-0.291734	56.9759	0
	High	TSTVDLPIENQLLWQIDR	2	1	1	P34932		0	5.38976e+06	0	3.639e-06		35.07	0.0048076	2	2141.12	-0.10207	58.3442	0
	High	SEENEEPMETDQNAK	2	1	1	P34932		0	5.8747e+06	0	6.65e-06		34.35	0.000881478	2	1750.71	-0.405969	18.8217	0
	High	AFSDPFVEAEK	2	1	1	P34932		0	4.77338e+06	0	0.0004693		30.11	0.00970115	2	1239.59	0.212843	40.3989	0
	High	SVMDATQIAGLNcLR	1	1	1	P34932	C13(Methylthio)	0	3.08339e+06	0	0.0001598		25.17	0.0387713	2	1637.78	-2.20605	53.5303	0
	High	WNSPAEEGSSDcEVFSK	1	1	1	P34932	C12(Methylthio)	0	7.11394e+06	0	0.0007553		24.63	0.00533742	2	1917.76	0.0984963	43.4409	0
	High	VLATAFDTTLGGR	1	1	1	P34932		0	1.32733e+07	0	0.001841		21.85	0.0787022	2	1321.71	-2.12736	40.0963	0
	High	NKEDQYDHLDAADMTK	1	1	1	P34932		0	7.35807e+06	0	0.0005083		13.11	0.256542	3	1893.83	-0.616569	25.7447	1
	High	MQVDQEEPHVEEQQQQTPAENK	1	1	1	P34932		0	1.63771e+07	0	9.79e-05		10.42	0.717178	3	2622.17	-0.147703	23.3398	0
	High	NAVEEYVYEMR	1	1	1	P34932		0	2.98182e+06	0.001	0.004625		13.91	0.215415	2	1402.63	-1.22298	43.5687	0
P26038	Moesin OS=Homo sapiens OX=9606 GN=MSN PE=1 SV=3 - [MOES_HUMAN]	587.657	36.57	1	13	19	36	2.46107e+07	577	67.7778	6.40479	0.00404176
	A3	Sequence	# PSMs	# Proteins	# Protein Groups	Protein Group Accessions	Modifications	ΔCn	Area	q-Value	PEP		IonScore	Exp Value	Charge	MH+ [Da]	ΔM [ppm]	RT [min]	# Missed Cleavages
	High	TQEQLALEMAELTAR	2	1	1	P26038		0	7.18415e+06	0	1.955e-10		82.52	8.56429e-08	2	1703.86	0.631612	50.7377	0
	High	FYPEDVSEELIQDITQR	4	1	1	P26038		0	3.37424e+06	0	1.49e-09		72.44	8.69501e-07	2	2082	0.0297049	60.4529	0
	High	ALTSELANAR	2	1	1	P26038		0	1.12644e+07	0	1.003e-05		59.6	1.41446e-05	2	1045.56	0.180833	25.9314	0
	High	ISQLEMAR	2	1	1	P26038		0	9.47813e+06	0	6.872e-05		48.54	0.000192443	2	947.498	-0.278705	24.3621	0
	High	APDFVFYAPR	2	3	3	P15311;P26038;P35241		0	2.50377e+07	0	1.535e-05		46.85	0.000224094	2	1182.59	-0.710229	46.0056	0
	High	KPDTIEVQQMK	2	3	3	P15311;P26038;P35241		0	1.22233e+07	0	0.0001484		41.48	0.00115217	2	1316.69	1.19195	21.9616	0
	High	ESEAVEWQQK	1	1	1	P26038		0	1.76906e+07	0	0.0001025		40.75	0.000567942	2	1233.57	-0.320168	24.3172	0
	High	EVWFFGLQYQDTK	2	1	1	P26038		0	2.94736e+06	0	4.349e-06		38.4	0.00169116	2	1660.8	-0.769084	57.2317	0
	High	LFFLQVK	2	3	3	P15311;P26038;P35241		0	4.92052e+06	0	9.18e-05		34.76	0.00168768	2	894.544	-0.756048	49.9772	0
	High	IGFPWSEIR	2	3	3	P15311;P26038;P35241		0	30042236	0	0.0002181		29.26	0.0181423	2	1104.58	-0.372763	52.864	0
	High	TANDMIHAENMR	3	1	1	P26038		0	1.0311e+07	0	0.003304		27.11	0.0103104	2	1402.62	0.185151	23.5665	0
	High	KAQQELEEQTR	1	1	1	P26038		0	2.40462e+06	0	0.0009032		24.91	0.0403562	2	1359.68	-1.26749	16.7617	1
	High	AQMVQEDLEK	2	1	1	P26038		0	17314736	0	0.0008064		24.14	0.0377769	2	1190.57	-0.0337204	23.5534	0
	High	EGILNDDIYcPPETAVLLASYAVQSK	1	1	1	P26038	C10(Methylthio)	0	2.99532e+06	0	0.003022		18.35	0.233948	3	2855.38	-0.606162	64.1556	0
	High	IAQDLEMYGVNYFSIK	1	1	1	P26038		0	3.31807e+06	0	0.00165		10.39	1.40773	2	1890.93	0.145168	54.8121	0
	High	FVIKPIDK	2	3	3	P15311;P26038;P35241		0	1.59486e+07	0.001	0.004401		32.25	0.00345484	2	959.591	-1.04528	27.8673	0
	High	RKPDTIEVQQMK	2	3	3	P15311;P26038;P35241		0	8.04818e+06	0.001	0.01718		25.15	0.0441436	2	1472.79	-0.540263	20.2728	1
	High	ALELEQER	2	1	1	P26038		0	1.87522e+07	0.001	0.01652		23.88	0.047065	2	987.513	2.04508	23.7133	0
	High	EDAVLEYLK	1	1	1	P26038		0	5.9997e+06	0.001	0.01425		19.2	0.158098	2	1079.56	0.430015	42.7213	0
Q16658	Fascin OS=Homo sapiens OX=9606 GN=FSCN1 PE=1 SV=3 - [FSCN1_HUMAN]	572.854	52.94	1	20	20	42	4.5162e+07	493	54.4961	7.23975	0.00471539
	A3	Sequence	# PSMs	# Proteins	# Protein Groups	Protein Group Accessions	Modifications	ΔCn	Area	q-Value	PEP		IonScore	Exp Value	Charge	MH+ [Da]	ΔM [ppm]	RT [min]	# Missed Cleavages
	High	DVPWGVDSLITLAFQDQR	3	1	1	Q16658		0	4.59232e+06	0	1.704e-09		65.49	4.57631e-06	2	2060.04	0.0670732	64.3199	0
	High	NGQLAASVETAGDSELFLMK	2	1	1	Q16658		0	1.21689e+07	0	7.892e-08		60.91	1.42324e-05	2	2081.02	-0.488994	51.7336	0
	High	SSYDVFQLEFNDGAYNIK	2	1	1	Q16658		0	2.44622e+07	0	1.206e-08		60.05	1.19121e-05	2	2109.97	-1.19279	55.0981	0
	High	YSVQTADHR	2	1	1	Q16658		0	2.53798e+07	0	1.445e-05		53.34	4.00882e-05	2	1076.51	0.149798	17.3253	0
	High	YWTLTATGGVQSTASSK	2	1	1	Q16658		0	1.52629e+07	0	3.89e-08		47.48	0.000247429	2	1757.87	-0.058237	39.6914	0
	High	VNASASSLK	2	1	1	Q16658		0	197814	0	0.0001324		39.7	0.00140369	2	876.479	0.280742	17.2529	0
	High	LScFAQTVSPAEK	2	1	1	Q16658	C3(Methylthio)	0	4.46574e+07	0	3.255e-05		39.36	0.00107187	2	1426.67	-0.244405	39.7767	0
	High	WSLQSEAHR	2	1	1	Q16658		0	1.48274e+07	0	0.00013		36.69	0.00198217	2	1113.54	-0.762514	25.5703	0
	High	FLIVAHDDGR	2	1	1	Q16658		0	2.75231e+07	0	9.849e-06		36.28	0.00236682	2	1142.59	-1.13738	27.3618	0
	High	VGKDELFALEQScAQVVLQAANER	2	1	1	Q16658	C13(Methylthio)	0	2.39752e+06	0	7.893e-06		32.61	0.00915623	3	2664.31	-0.0553479	65.073	1
	High	YLAADKDGNVTcER	4	1	1	Q16658	C12(Methylthio)	0	2.01022e+07	0	0.0001809		32.14	0.00345182	2	1600.71	-0.122562	25.9576	1
	High	QIWTLEQPPDEAGSAAVcLR	4	1	1	Q16658	C18(Methylthio)	0	1.97619e+07	0	1.606e-05		28.2	0.0212655	2	2230.06	0.249321	53.6883	0
	High	LVARPEPATGYTLEFR	3	1	1	Q16658		0	2.81905e+07	0	4.935e-05		27.58	0.0259255	3	1819.97	-0.806708	39.4391	0
	High	DELFALEQScAQVVLQAANER	1	1	1	Q16658	C10(Methylthio)	0	877394	0	8.293e-07		25.31	0.0400441	3	2380.13	-0.196682	65.5557	0
	High	YFGGTEDR	2	1	1	Q16658		0	1.79627e+07	0	0.001776		24.15	0.0126915	2	944.411	0.0687949	20.6769	0
	High	KVTGTLDANR	2	1	1	Q16658		0	6.55754e+06	0.001	0.013		30.84	0.0119912	2	1074.59	0.233019	16.6505	1
	High	YLTAEAFGFK	2	1	1	Q16658		0	1.31266e+07	0.001	0.01565		19.6	0.165568	2	1146.58	0.233958	46.5596	0
	High	LINRPIIVFR	1	1	1	Q16658		0	3.97558e+06	0.001	0.01821		14.98	0.104837	2	1240.79	0.26666	40.6561	0
	High	ASAETVDPASLWEY	1	1	1	Q16658		0	1.20337e+07	0.001	0.003909		14.62	0.283018	2	1538.7	0.14829	54.6248	0
	High	YLAPSGPSGTLK	1	1	1	Q16658		0	6.26382e+07	0.006	0.1043		11.23	1.0999	2	1190.64	-0.0707258	26.1453	0
P60174	Triosephosphate isomerase OS=Homo sapiens OX=9606 GN=TPI1 PE=1 SV=3 - [TPIS_HUMAN]	570.999	70.63	1	14	14	35	4.98464e+07	286	30.7717	5.92236	0.00392949
	A3	Sequence	# PSMs	# Proteins	# Protein Groups	Protein Group Accessions	Modifications	ΔCn	Area	q-Value	PEP		IonScore	Exp Value	Charge	MH+ [Da]	ΔM [ppm]	RT [min]	# Missed Cleavages
	High	QSLGELIGTLNAAK	2	1	1	P60174		0	2.84034e+07	0	1.333e-07		71.3	8.7104e-07	2	1414.79	-0.520968	51.1054	0
	High	VVLAYEPVWAIGTGK	3	1	1	P60174		0	4.19659e+07	0	1.604e-07		65.91	2.98762e-06	2	1602.89	-1.06346	53.4314	0
	High	IIYGGSVTGATcK	2	1	1	P60174	C12(Methylthio)	0	3.66673e+07	0	1.36e-07		59.04	1.49062e-05	2	1315.64	-0.128483	33.2144	0
	High	SNVSDAVAQSTR	2	1	1	P60174		0	4.85379e+07	0	5.073e-07		58.17	1.79838e-05	2	1234.6	-0.0411871	20.5117	0
	High	VTNGAFTGEISPGMIK	2	1	1	P60174		0	3.54466e+07	0	4.87e-06		48.86	0.000188525	2	1621.83	-0.0902184	41.0286	0
	High	HVFGESDELIGQK	4	1	1	P60174		0	2.85273e+07	0	6.275e-07		48.16	0.000200875	2	1458.72	-1.63362	30.232	0
	High	DcGATWVVLGHSER	4	1	1	P60174	C2(Methylthio)	0	1.48413e+07	0	2.192e-05		44.78	0.000191279	2	1575.7	-0.0387563	44.4449	0
	High	TATPQQAQEVHEK	3	1	1	P60174		0	4.58467e+07	0	4.63e-05		37.97	0.00212252	2	1466.72	-0.92574	16.1406	0
	High	VPADTEVVcAPPTAYIDFAR	3	1	1	P60174	C9(Methylthio)	0	3.05763e+07	0	3.197e-06		34.9	0.00381841	2	2181.03	-0.737794	56.689	0
	High	VAHALAEGLGVIAcIGEK	3	1	1	P60174	C14(Methylthio)	0	5.2485e+06	0	1.04e-05		33.62	0.00530102	3	1796.94	-0.265503	62.4986	0
	High	ELASQPDVDGFLVGGASLKPEFVDIINAK	1	1	1	P60174		0	5.51546e+07	0	1.813e-06		31.65	0.0107032	3	3029.58	-0.8251	58.4979	0
	High	IAVAAQNcYK	2	1	1	P60174	C8(Methylthio)	0	3.57349e+07	0	0.0001318		30.88	0.00657349	2	1126.54	0.628295	28.8784	0
	High	FFVGGNWK	2	1	1	P60174		0	1.19764e+07	0.001	0.009573		19.33	0.0904277	2	954.484	0.449329	40.9749	0
	High	VVFEQTK	2	1	1	P60174		0	8.05768e+06	0.003	0.03851		17.17	0.141022	2	850.467	-0.245626	20.3187	0
P68366	Tubulin alpha-4A chain OS=Homo sapiens OX=9606 GN=TUBA4A PE=1 SV=1 - [TBA4A_HUMAN]	563.949	38.62	1	4	11	36	1.35858e+08	448	49.8924	5.05908	0.00404176
	A3	Sequence	# PSMs	# Proteins	# Protein Groups	Protein Group Accessions	Modifications	ΔCn	Area	q-Value	PEP		IonScore	Exp Value	Charge	MH+ [Da]	ΔM [ppm]	RT [min]	# Missed Cleavages
	High	SIQFVDWcPTGFK	3	2	1	P68366	C8(Methylthio)	0	4.2298e+07	0	4.957e-07		70.47	6.5961e-07	2	1573.72	0.367974	59.6427	0
	High	LISQIVSSITASLR	8	4	2	Q9BQE3;P68366		0	1.19723e+07	0	1.444e-07		67.74	1.37138e-06	2	1487.88	0.0596552	61.6564	0
	High	AVcMLSNTTAIAEAWAR	3	2	1	P68366	C3(Methylthio)	0	7.15014e+06	0	8.72e-10		51.93	8.81663e-05	2	1853.87	-0.459393	57.7307	0
	High	AVFVDLEPTVIDEIR	2	1	1	P68366		0	2.64811e+06	0	3.685e-07		49.84	0.000154592	2	1715.92	-0.335251	55.9385	0
	High	EDMAALEK	2	3	2	Q9BQE3;P68366		0	3.88404e+07	0	0.0007148		48.56	8.9162e-05	2	906.425	0.923238	21.9	0
	High	IHFPLATYAPVISAEK	4	3	2	Q9BQE3;P68366		0	6.29898e+07	0	3.037e-06		43.47	0.000553229	2	1756.96	0.210218	49.9476	0
	High	FDGALNVDLTEFQTNLVPYPR	5	3	2	Q9BQE3;P68366		0	4.17777e+07	0	6.56e-06		39.99	0.00176907	3	2409.21	-0.561509	58.5438	0
	High	FDLMYAK	2	4	3	Q9BQE3;P68366;A6NHL2		0	3.4179e+07	0	0.000309		37.6	0.00095579	2	887.434	0.575912	37.1696	0
	High	AFVHWYVGEGMEEGEFSEAR	2	3	2	Q9BQE3;P68366		0	1.75584e+07	0	2.36e-06		26.33	0.0129209	2	2330.02	-1.36779	50.3595	0
	High	VGINYQPPTVVPGGDLAK	4	3	2	Q9BQE3;P68366		0	3.02285e+08	0	0.001846		22.28	0.0804524	2	1824.99	0.206107	42.4786	0
	High	AYHEQLSVAEITNAcFEPANQMVK	1	2	1	P68366	C15(Methylthio)	0	3.45604e+07	0.001	0.01863		14.99	0.389857	3	2739.26	0.256505	56.4749	0
P38646	Stress-70 protein, mitochondrial OS=Homo sapiens OX=9606 GN=HSPA9 PE=1 SV=2 - [GRP75_HUMAN]	547.99	39.03	1	21	21	39	3.23194e+07	679	73.6348	6.16357	0.00437858
	A3	Sequence	# PSMs	# Proteins	# Protein Groups	Protein Group Accessions	Modifications	ΔCn	Area	q-Value	PEP		IonScore	Exp Value	Charge	MH+ [Da]	ΔM [ppm]	RT [min]	# Missed Cleavages
	High	AQFEGIVTDLIR	2	1	1	P38646		0	1.57482e+07	0	3.3e-07		61.47	1.09067e-05	2	1361.74	-0.667251	54.0475	0
	High	STNGDTFLGGEDFDQALLR	2	1	1	P38646		0	1.16561e+07	0	6.18e-08		55.5	3.45252e-05	2	2055.96	-0.440768	53.287	0
	High	VQQTVQDLFGR	2	1	1	P38646		0	1.78305e+07	0	9.341e-06		49.65	0.00017668	2	1290.68	-0.96902	38.3965	0
	High	DAGQISGLNVLR	2	1	1	P38646		0	1.56944e+07	0	5.366e-06		49.1	0.000172853	2	1242.68	-0.719802	39.5629	0
	High	SDIGEVILVGGMTR	2	1	1	P38646		0	7.20729e+06	0	6.765e-06		48.41	0.000230017	2	1446.76	0.556934	48.0826	0
	High	QAASSLQQASLK	2	1	1	P38646		0	2.97869e+07	0	1.477e-05		45.79	0.000411268	2	1231.66	0.668437	21.622	0
	High	ASNGDAWVEAHGK	2	1	1	P38646		0	1.11057e+07	0	2.894e-05		40.22	0.000798508	2	1341.62	1.22937	21.6765	0
	High	VEAVNMAEGIIHDTETK	4	1	1	P38646		0	1.31548e+07	0	2.975e-06		39.42	0.00150289	2	1856.9	-0.733848	46.6999	0
	High	EQQIVIQSSGGLSK	2	1	1	P38646		0	2.64793e+07	0	1.134e-05		34.69	0.00450003	2	1473.79	-0.988649	27.6581	0
	High	ETAENYLGHTAK	2	1	1	P38646		0	1.02998e+07	0	0.0001648		28.34	0.0141425	2	1333.64	0.0314649	21.8676	0
	High	TTPSVVAFTADGER	2	1	1	P38646		0	6.669e+06	0	0.001353		27.55	0.0239957	2	1450.71	-1.92744	35.037	0
	High	QAVTNPNNTFYATK	1	1	1	P38646		0	4.0692e+07	0	0.0001706		26.76	0.027623	2	1568.77	-0.517891	26.5092	0
	High	LLGQFTLIGIPPAPR	1	1	1	P38646		0	3.55653e+06	0	5.725e-05		24.96	0.00989377	2	1592.95	-0.716799	56.3345	0
	High	VINEPTAAALAYGLDK	1	1	1	P38646		0	2.14691e+07	0	0.0002616		24.08	0.0533498	2	1645.88	-0.41768	44.7158	0
	High	SQVFSTAADGQTQVEIK	1	1	1	P38646		0	8.07379e+06	0	0.0001888		24.07	0.0597406	2	1808.9	-0.363885	33.4725	0
	High	MEEFKDQLPADEcNK	4	1	1	P38646	C13(Methylthio)	0	9.29633e+06	0	0.000413		23.6	0.0133137	2	1842.77	-1.84544	35.1013	1
	High	NAVITVPAYFNDSQR	1	1	1	P38646		0	2.23798e+07	0	0.0003354		12.22	0.971662	2	1694.85	1.33051	44.309	0
	High	DDIENMVK	2	1	1	P38646		0	6.63661e+06	0.001	0.004609		21.46	0.041798	2	963.446	0.45044	28.3643	0
	High	YDDPEVQK	2	1	1	P38646		0	3.86073e+06	0.002	0.02276		11.78	0.421477	2	993.453	0.960694	18.6828	0
	High	LFEMAYK	1	1	1	P38646		0	7.46379e+06	0.005	0.07868		20.78	0.0530608	2	901.449	0.403809	35.6745	0
	High	DQLPADEcNK	1	1	1	P38646	C8(Methylthio)	0	5.2916e+06	0.008	0.1324		10.48	0.273086	2	1178.48	-0.0656085	24.7415	0
P35527	Keratin, type I cytoskeletal 9 OS=Homo sapiens OX=9606 GN=KRT9 PE=1 SV=3 - [K1C9_HUMAN]	541.087	41.41	1	19	19	33	4.60747e+07	623	62.0268	5.23682	-
	A3	Sequence	# PSMs	# Proteins	# Protein Groups	Protein Group Accessions	Modifications	ΔCn	Area	q-Value	PEP		IonScore	Exp Value	Charge	MH+ [Da]	ΔM [ppm]	RT [min]	# Missed Cleavages
	High	FSSSSGYGGGSSR	2	1	1	P35527		0	3.87415e+07	0	1.09e-05		64.13	1.70001e-06	2	1235.53	-0.417197	18.5952	0
	High	QEIEcQNQEYSLLLSIK	2	1	1	P35527	C5(Methylthio)	0	1.42595e+07	0	7.703e-09		63.53	6.14398e-06	2	2084.01	0.600887	55.3039	0
	High	SGGGGGGGLGSGGSIR	2	1	1	P35527		0	2.57332e+07	0	3.121e-07		59.71	9.56804e-06	2	1232.6	-0.350148	19.5838	0
	High	SDLEmQYETLQEELmALK	2	1	1	P35527	M5(Oxidation); M15(Oxidation)	0	1.21002e+07	0	1.392e-07		57.23	2.18566e-05	2	2203.01	-1.3886	58.3169	0
	High	GGSGGSYGGGGSGGGYGGGSGSR	2	1	1	P35527		0	2.43629e+07	0	4.088e-08		56.87	4.00899e-06	2	1791.73	-0.256054	18.3255	0
	High	STMQELNSR	2	1	1	P35527		0	2.65718e+07	0	2.053e-05		49.5	9.42496e-05	2	1065.5	-0.176625	19.9177	0
	High	VQALEEANNDLENK	2	1	1	P35527		0	6.68603e+07	0	4.907e-06		46.05	0.000268178	2	1586.76	-0.575506	27.8073	0
	High	EIETYHNLLEGGQEDFESSGAGK	2	1	1	P35527		0	3.26224e+07	0	1.316e-07		32.54	0.00476394	3	2510.13	0.145411	41.9311	0
	High	QGVDADINGLR	2	1	1	P35527		0	3.16415e+07	0	0.0002701		30.04	0.00896703	2	1157.59	-0.422947	29.2133	0
	High	FEmEQNLR	2	1	1	P35527	M3(Oxidation)	0	1.08895e+07	0	0.001027		29.29	0.00883204	2	1082.49	0.11422	20.8141	0
	High	YcGQLQmIQEQISNLEAQITDVR	2	1	1	P35527	C2(Methylthio); M7(Oxidation)	0	3.34803e+06	0	0.003487		28.77	0.0173889	3	2742.29	0.530036	64.6868	0
	High	QVLDNLTmEK	2	1	1	P35527	M8(Oxidation)	0	2.56564e+07	0	0.001444		23.99	0.0544669	2	1206.6	-0.475242	27.6088	0
	High	HGVQELEIELQSQLSK	1	1	1	P35527		0	4.7973e+06	0	0.0004018		15.19	0.419228	2	1837.96	-0.459254	48.2867	0
	High	NYSPYYNTIDDLKDQIVDLTVGNNK	1	1	1	P35527		0	5.64687e+06	0	0.001113		14.47	0.650237	3	2902.41	0.324515	59.718	1
	High	mTLDDFR	1	1	1	P35527	M1(Oxidation)	0	4.6977e+06	0.001	0.0052		27.43	0.00650583	2	913.408	-0.0804743	26.623	0
	High	TLLDIDNTR	2	1	1	P35527		0	1.97445e+07	0.001	0.01007		23.05	0.0777857	2	1060.56	1.30455	32.5923	0
	High	IQDWYDK	2	1	1	P35527		0	5.5408e+06	0.001	0.01609		18.72	0.0906366	2	967.452	0.264376	28.7049	0
	High	NYSPYYNTIDDLK	1	1	1	P35527		0	3.99664e+06	0.001	0.01253		11.87	0.572114	2	1605.74	-0.0384302	41.396	0
	High	QEYEQLIAK	1	1	1	P35527		0	2.4115e+07	0.003	0.04164		13.84	0.518375	2	1121.58	-0.838127	29.1464	0
P63104	14-3-3 protein zeta/delta OS=Homo sapiens OX=9606 GN=YWHAZ PE=1 SV=1 - [1433Z_HUMAN]	538.06	55.92	1	8	11	33	1.41865e+08	245	27.7277	4.79248	0.00370495
	A3	Sequence	# PSMs	# Proteins	# Protein Groups	Protein Group Accessions	Modifications	ΔCn	Area	q-Value	PEP		IonScore	Exp Value	Charge	MH+ [Da]	ΔM [ppm]	RT [min]	# Missed Cleavages
	High	SVTEQGAELSNEER	4	1	1	P63104		0	1.368e+08	0	1.748e-08		68.65	1.12578e-06	2	1548.71	0.774867	21.9037	0
	High	DIcNDVLSLLEK	2	1	1	P63104	C3(Methylthio)	0	7.57191e+06	0	2.726e-08		65.06	3.49316e-06	2	1407.69	-0.117751	65.8806	0
	High	YLAEVAAGDDKK	3	1	1	P63104		0	4.91131e+07	0	4.463e-07		56.32	3.33685e-05	2	1279.65	-0.127957	20.5375	1
	High	DSTLIMQLLR	4	7	7	P31946;P62258;Q04917;P61981;P31947;P27348;P63104		0	1.74328e+08	0	2.204e-06		55.97	3.30073e-05	2	1189.66	-0.0378506	56.6624	0
	High	DSTLImQLLR	2	7	7	P31946;P62258;Q04917;P61981;P31947;P27348;P63104	M6(Oxidation)	0	3.09617e+06	0	2.822e-06		54.78	5.18949e-05	2	1205.65	-1.99586	53.4269	0
	High	TAFDEAIAELDTLSEESYK	6	1	1	P63104		0	3.72634e+07	0	1.558e-08		49.9	0.000116655	2	2131.99	0.0701964	62.4926	0
	High	EMQPTHPIR	2	3	3	P31946;P27348;P63104		0	2.6695e+07	0	0.001864		38.9	0.00153946	2	1108.56	0.522612	17.8733	0
	High	YLAEVAAGDDK	2	1	1	P63104		0	8.51847e+06	0	0.00048		34.21	0.00455178	2	1151.56	0.281217	23.662	0
	High	GIVDQSQQAYQEAFEISK	2	1	1	P63104		0	8.89912e+07	0	5.852e-06		26.74	0.0314577	2	2040.99	0.538768	46.4571	0
	High	NLLSVAYK	4	7	7	P31946;P62258;Q04917;P61981;P31947;P27348;P63104		0	1.14469e+08	0.001	0.01476		25.97	0.0136582	2	907.525	0.331355	35.7891	0
	High	FLIPNASQAESK	1	1	1	P63104		0	4.23911e+07	0.004	0.05567		13.61	0.670688	2	1304.68	-0.229634	33.9378	0
	High	DNLTLWTSDTQGDEAEAGEGGEN	1	1	1	P63104		0	1.30817e+07	0.005	0.07143		12.57	0.182606	2	2408.99	-1.03004	44.5453	0
P07195	L-lactate dehydrogenase B chain OS=Homo sapiens OX=9606 GN=LDHB PE=1 SV=2 - [LDHB_HUMAN]	534.181	45.21	1	11	12	33	1.04165e+08	334	36.6151	6.04932	0.00370495
	A3	Sequence	# PSMs	# Proteins	# Protein Groups	Protein Group Accessions	Modifications	ΔCn	Area	q-Value	PEP		IonScore	Exp Value	Charge	MH+ [Da]	ΔM [ppm]	RT [min]	# Missed Cleavages
	High	SLADELALVDVLEDK	4	1	1	P07195		0	4.59539e+07	0	4.225e-09		71.36	1.05284e-06	2	1629.86	0.269273	59.3646	0
	High	IVADKDYSVTANSK	2	1	1	P07195		0	2.31043e+07	0	4.444e-06		57.18	2.50768e-05	2	1510.77	-1.20765	20.7396	1
	High	GLTSVINQK	2	1	1	P07195		0	3.82894e+07	0	0.0003386		49.98	0.00012407	2	959.553	0.941875	25.8371	0
	High	LKDDEVAQLK	2	1	1	P07195		0	8.19571e+07	0	5.389e-05		46.92	0.000327209	2	1158.64	0.194236	21.7387	1
	High	VIGSGcNLDSAR	4	2	2	P00338;P07195	C6(Methylthio)	0	8.49487e+07	0	1.634e-05		46.23	0.000197733	2	1237.57	0.313324	32.2814	0
	High	SADTLWDIQK	2	1	1	P07195		0	3.58323e+07	0	0.0001133		43.94	0.000470247	2	1176.59	-0.877728	38.8447	0
	High	MVVESAYEVIK	2	1	1	P07195		0	9.12809e+07	0	1.074e-05		42.63	0.000657638	2	1267.66	-1.81809	38.322	0
	High	GEMMDLQHGSLFLQTPK	4	1	1	P07195		0	2.68672e+07	0	1.08e-06		37.66	0.00222814	2	1931.94	0.500879	46.4507	0
	High	IVVVTAGVR	3	1	1	P07195		0	2.60795e+07	0	0.001843		31	0.0024227	2	913.583	-0.252921	26.8529	0
	High	LIAPVAEEEATVPNNK	3	1	1	P07195		0	1.36266e+08	0	5.791e-06		29.43	0.013797	2	1694.9	0.367423	32.507	0
	High	GYTNWAIGLSVADLIESMLK	2	1	1	P07195		0	321336	0	3.942e-07		28.35	0.0241259	2	2181.12	-0.604203	68.3802	0
	High	mVVESAYEVIK	1	1	1	P07195	M1(Oxidation)	0	2.32814e+06	0	4.964e-05		24.89	0.0340557	2	1283.65	-4.20553	33.6063	0
	High	FIIPQIVK	2	1	1	P07195		0	2.12792e+07	0.002	0.03488		18.74	0.0568053	2	957.616	3.18211	47.7848	0
P46940	Ras GTPase-activating-like protein IQGAP1 OS=Homo sapiens OX=9606 GN=IQGAP1 PE=1 SV=1 - [IQGA1_HUMAN]	533.887	16.72	1	19	19	35	7.14389e+06	1657	189.134	6.48096	0.00392949
	A3	Sequence	# PSMs	# Proteins	# Protein Groups	Protein Group Accessions	Modifications	ΔCn	Area	q-Value	PEP		IonScore	Exp Value	Charge	MH+ [Da]	ΔM [ppm]	RT [min]	# Missed Cleavages
	High	ILAIGLINEALDEGDAQK	3	1	1	P46940		0	4.75468e+06	0	6.722e-09		57.3	2.24381e-05	2	1883.01	-0.0694688	57.9071	0
	High	VDFTEEEINNMK	2	1	1	P46940		0	4.53025e+06	0	1.828e-06		55.42	1.69376e-05	2	1468.66	-1.23866	36.7811	0
	High	QLSSSVTGLTNIEEENcQR	2	1	1	P46940	C17(Methylthio)	0	3.92661e+06	0	5.002e-07		53.99	3.31191e-05	2	2153.98	-0.552835	43.3168	0
	High	NVIFEISPTEEVGDFEVK	2	1	1	P46940		0	3.70939e+06	0	9.61e-09		51.19	0.000127355	2	2052.02	-0.902938	55.1098	0
	High	SWVNQMESQTGEASK	2	1	1	P46940		0	5.08846e+06	0	2.039e-05		43.71	0.000321327	2	1681.75	-1.30444	35.1609	0
	High	EEIQSSISGVTAAYNR	2	1	1	P46940		0	3.20208e+06	0	2.719e-06		40.66	0.00115967	2	1724.84	-0.149079	36.4966	0
	High	LPYDVTPEQALAHEEVK	2	1	1	P46940		0	7.13758e+06	0	6.608e-05		36.5	0.00342524	3	1938.96	-8.37487	39.9816	0
	High	LTAEEMDER	2	1	1	P46940		0	2.9465e+06	0	0.001051		35.71	0.000913017	2	1093.48	-0.78279	21.032	0
	High	EELQSGVDAANSAAQQYQR	2	1	1	P46940		0	4.11153e+06	0	3.031e-05		35.15	0.00323822	2	2064.95	-2.42558	31.8808	0
	High	TLINAEDPPMVVVR	2	1	1	P46940		0	6182896	0	7.254e-05		32.15	0.00862495	2	1553.83	-1.61138	43.093	0
	High	VDQIQEIVTGNPTVIK	2	1	1	P46940		0	4.47432e+06	0	1.329e-05		30.79	0.00983744	2	1753.97	-0.830188	43.7834	0
	High	FFQTAcDVPELQDK	1	1	1	P46940	C6(Methylthio)	0	5.36204e+06	0	8.666e-06		30.74	0.00514434	2	1686.75	1.16352	49.8475	0
	High	GVLLEIEDLQVNQFK	2	1	1	P46940		0	2.36849e+06	0	1.477e-05		30.14	0.0131202	2	1744.95	-0.568623	56.6796	0
	High	LEGVLAEVAQHYQDTLIR	1	1	1	P46940		0	2.51474e+06	0	0.0009397		30.04	0.0141194	3	2055.09	0.414796	56.1433	0
	High	YGIQMPAFSK	1	1	1	P46940		0	3.71513e+06	0	0.001313		24.46	0.0331239	2	1141.57	-1.28211	42.8801	0
	High	ALESGDVNTVWK	2	1	1	P46940		0	1.70801e+06	0	0.000198		23.33	0.067587	2	1318.66	-3.29871	34.4352	0
	High	YQELINDIAR	2	1	1	P46940		0	4139635	0	0.001829		22.48	0.0915198	2	1234.64	0.358569	37.1865	0
	High	SNQQLENDLNLMDIK	2	1	1	P46940		0	8.1112e+06	0	9.985e-05		22.32	0.0841108	2	1774.87	1.23234	49.1309	0
	High	ALQSPALGLR	1	1	1	P46940		0	1.79067e+06	0.006	0.09442		15.27	0.0906358	2	1025.61	-0.222648	32.244	0
P30740	Leukocyte elastase inhibitor OS=Homo sapiens OX=9606 GN=SERPINB1 PE=1 SV=1 - [ILEU_HUMAN]	529.959	38.26	1	13	13	27	2.13117e+07	379	42.7147	6.27783	0.00303132
	A3	Sequence	# PSMs	# Proteins	# Protein Groups	Protein Group Accessions	Modifications	ΔCn	Area	q-Value	PEP		IonScore	Exp Value	Charge	MH+ [Da]	ΔM [ppm]	RT [min]	# Missed Cleavages
	High	LGVQDLFNSSK	2	1	1	P30740		0	1.37414e+07	0	1.316e-06		76.59	3.27824e-07	2	1207.63	0.893317	43.6115	0
	High	TYGADLASVDFQHASEDAR	4	1	1	P30740		0	2.20571e+07	0	9.525e-11		71.67	5.54827e-07	2	2052.92	-1.4234	38.3283	0
	High	ADLSGMSGAR	2	1	1	P30740		0	7.51278e+06	0	1.457e-05		66.75	1.82817e-06	2	964.453	0.871943	20.577	0
	High	IPELLASGMVDNMTK	2	1	1	P30740		0	2.81366e+07	0	2.226e-09		64.98	4.74943e-06	2	1618.82	-0.572702	49.172	0
	High	FQSLNADINKR	2	1	1	P30740		0	5.61282e+06	0	0.0004156		49.93	0.000142275	2	1305.69	1.07155	25.2839	1
	High	TYNFLPEFLVSTQK	2	1	1	P30740		0	1.15661e+07	0	6.978e-07		49.05	0.000196633	2	1686.87	-0.129556	57.7151	0
	High	LEESYTLNSDLAR	2	1	1	P30740		0	1.32225e+07	0	5.357e-07		37.29	0.0025756	2	1510.74	-0.0678154	34.9686	0
	High	mEQLSSANTR	2	1	1	P30740	N-Term(Acetyl)	0	5.61904e+06	0	0.0002712		29.93	0.00787593	2	1178.55	-0.743393	29.7366	0
	High	LVLVNAIYFK	2	1	1	P30740		0	2.84747e+06	0	0.0002372		25.45	0.00983601	2	1179.71	0.533771	52.1007	0
	High	FAYGYIEDLK	2	1	1	P30740		0	1.04272e+07	0	0.00177		16.22	0.290119	2	1218.6	-0.783099	44.8375	0
	High	FQSLNADINK	2	1	1	P30740		0	6.43655e+06	0.001	0.01539		18.34	0.200047	2	1149.59	-2.14108	27.7588	0
	High	KIEEQLTLEK	2	1	1	P30740		0	6.92282e+06	0.004	0.06194		32.89	0.00645125	2	1230.69	-0.920301	25.7405	1
	High	HNSSGSILFLGR	1	1	1	P30740		0	3.92189e+06	0.009	0.1531		19.18	0.159431	2	1287.67	-6.82072	37.915	0
P22314	Ubiquitin-like modifier-activating enzyme 1 OS=Homo sapiens OX=9606 GN=UBA1 PE=1 SV=3 - [UBA1_HUMAN]	521.125	27.79	1	20	20	44	2.09005e+07	1058	117.774	5.75732	0.00493993
	A3	Sequence	# PSMs	# Proteins	# Protein Groups	Protein Group Accessions	Modifications	ΔCn	Area	q-Value	PEP		IonScore	Exp Value	Charge	MH+ [Da]	ΔM [ppm]	RT [min]	# Missed Cleavages
	High	NEEDAAELVALAQAVNAR	2	1	1	P22314		0	1.03329e+07	0	1.531e-08		68.52	1.85598e-06	2	1883.94	-0.584705	53.2892	0
	High	IHVSDQELQSANASVDDSR	4	1	1	P22314		0	15188156	0	2.816e-08		51.3	9.15518e-05	2	2070.97	-1.74595	27.8962	0
	High	LQTSSVLVSGLR	2	1	1	P22314		0	1.73902e+07	0	2.374e-05		46.26	0.000249605	2	1259.73	-1.43144	37.0008	0
	High	ALPAVQQNNLDEDLIR	1	1	1	P22314		0	2.25091e+07	0	2.262e-07		45.56	0.000422516	2	1808.95	0.5009	42.8419	0
	High	SLVASLAEPDFVVTDFAK	2	1	1	P22314		0	1.85128e+07	0	2.717e-07		43.45	0.000677784	2	1908.99	-0.326206	57.4172	0
	High	LDQPMTEIVSR	2	1	1	P22314		0	1.36952e+07	0	1.916e-05		39.87	0.00129829	2	1288.66	0.498861	33.3494	0
	High	DNPGVVTcLDEAR	2	1	1	P22314	C8(Methylthio)	0	1.08823e+07	0	5.325e-05		38.54	0.000762775	2	1434.63	-0.731495	43.4919	0
	High	IYDDDFFQNLDGVANALDNVDAR	3	1	1	P22314		0	3.73476e+06	0	6.464e-07		38.53	0.00127656	2	2600.19	-0.782797	61.082	0
	High	YDGQVAVFGSDLQEK	2	1	1	P22314		0	1.80552e+07	0	2.009e-05		37.36	0.00204774	2	1655.79	-0.458046	39.0958	0
	High	DEFEGLFK	2	1	1	P22314		0	3.96918e+06	0	0.001716		34.34	0.00206152	2	984.467	-0.566664	45.1657	0
	High	LAGTQPLEVLEAVQR	4	1	1	P22314		0	3.08075e+06	0	9.041e-05		32.39	0.00568115	2	1623.91	0.15677	50.727	0
	High	AENYDIPSADR	2	1	1	P22314		0	1.17524e+07	0	0.0009644		29.22	0.00843702	2	1250.56	0.0364913	25.6128	0
	High	NGSEADIDEGLYSR	2	1	1	P22314		0	4.63912e+06	0	2.365e-05		25.65	0.0137496	2	1525.68	-0.00657372	29.9004	0
	High	FEVQGLQPNGEEMTLK	2	1	1	P22314		0	2.10246e+07	0	0.001254		25.33	0.0464547	2	1819.89	0.0685406	43.0171	0
	High	KPLLESGTLGTK	2	1	1	P22314		0	1.13978e+07	0	0.0009438		23.92	0.0397398	2	1243.73	0.738747	25.2515	0
	High	VGEFcHNR	2	1	1	P22314	C5(Methylthio)	0	3.13922e+06	0	0.002169		23.15	0.0116201	2	1007.42	0.246711	22.5394	0
	High	AAVATFLQSVQVPEFTPK	3	1	1	P22314		0	1.22247e+07	0	2.94e-05		21.96	0.0853306	3	1933.04	-0.425161	56.5704	0
	High	QPAENVNQYLTDPK	2	1	1	P22314		0	1.91679e+07	0	0.0002797		18.68	0.159912	2	1616.79	0.390005	32.7638	0
	High	AVTLHDQGTAQWADLSSQFYLR	2	1	1	P22314		0	5.73155e+06	0	0.001087		10.38	1.37891	3	2507.23	-1.0112	53.4762	0
	High	QLYVLGHEAMK	1	1	1	P22314		0	2.62099e+06	0.001	0.007209		10.34	1.35931	2	1288.67	-0.528547	32.6164	0
Q04695	Keratin, type I cytoskeletal 17 OS=Homo sapiens OX=9606 GN=KRT17 PE=1 SV=2 - [K1C17_HUMAN]	509.608	46.53	1	12	17	34	5.21708e+07	432	48.076	5.021	-
	A3	Sequence	# PSMs	# Proteins	# Protein Groups	Protein Group Accessions	Modifications	ΔCn	Area	q-Value	PEP		IonScore	Exp Value	Charge	MH+ [Da]	ΔM [ppm]	RT [min]	# Missed Cleavages
	High	EVATNSELVQSGK	2	2	2	P02533;Q04695		0	5.37322e+07	0	1.279e-07		66.49	3.52289e-06	2	1361.69	-0.477513	20.704	0
	High	ASLEGNLAETENR	3	1	1	Q04695		0	4.4593e+07	0	2.474e-07		60.06	9.5176e-06	2	1403.68	-0.164127	26.2885	0
	High	cEMEQQNQEYK	2	2	2	P02533;Q04695	C1(Methylthio)	0	3.42695e+07	0	3.734e-06		52.02	6.28058e-06	2	1475.56	-0.515465	22.2755	0
	High	ILTATVDNANILLQIDNAR	1	1	1	Q04695		0	2.93391e+06	0	1.281e-07		49.78	0.00011256	2	2068.14	-1.93484	53.4244	0
	High	LEQEIATYR	2	2	2	P02533;Q04695		0	2.7423e+07	0	6.851e-05		44.09	0.000524472	2	1122.58	-0.955695	25.7854	0
	High	LSVEADINGLR	2	1	1	Q04695		0	2.8037e+06	0	4.412e-05		42.6	0.000780348	2	1186.64	0.0476083	38.6341	0
	High	ADLEMQIENLK	2	1	1	Q04695		0	0	0	9.502e-05		38.57	0.00193898	2	1303.66	0.184435	42.2285	0
	High	DAEDWFFSK	2	1	1	Q04695		0	6.72527e+06	0	0.0001206		36.27	0.00110942	2	1144.49	-0.0584234	49.5902	0
	High	ATMQNLNDR	2	1	1	Q04695		0	1.86622e+07	0	0.0002794		32.03	0.0046996	2	1062.5	-0.612013	18.9818	0
	High	LLEGEDAHLTQYK	3	1	1	Q04695		0	30879511	0	0.0005632		30.8	0.0119358	2	1516.76	0.373694	28.8171	0
	High	ALEEANTELEVK	1	1	1	Q04695		0	5.81873e+07	0	1.969e-05		30.53	0.013321	2	1345.68	-0.728218	28.7029	0
	High	NHEEEMNALR	2	2	2	P02533;Q04695		0	8.553e+06	0	0.002617		30.41	0.00459506	2	1242.55	-3.39907	20.1926	0
	High	GQVGGEINVEMDAAPGVDLSR	2	1	1	Q04695		0	1.44298e+07	0	1.295e-05		28.45	0.0183613	2	2114.02	-0.362143	43.7291	0
	High	TMQALEIELQSQLSMK	4	1	1	Q04695		0	2.91369e+06	0	2.599e-05		26.05	0.0430824	3	1849.94	-0.449349	55.5195	0
	High	VLDELTLAR	2	2	2	P02533;Q04695		0	6.5497e+06	0	0.0004367		23.91	0.0445055	2	1029.59	-1.08806	36.5831	0
	High	TIEELQNK	1	1	1	Q04695		0	6.71151e+06	0.003	0.04717		11.95	0.714855	2	974.516	0.2147	20.2593	0
	High	DYSQYYR	1	1	1	Q04695		0	2.09655e+06	0.005	0.07792		10.24	0.39742	2	994.426	-0.287845	28.2695	0
P02768	Serum albumin OS=Homo sapiens OX=9606 GN=ALB PE=1 SV=2 - [ALBU_HUMAN]	506.122	7.06	1	5	5	58	1.16979e+09	609	69.3215	6.27783	0.00651173
	A3	Sequence	# PSMs	# Proteins	# Protein Groups	Protein Group Accessions	Modifications	ΔCn	Area	q-Value	PEP		IonScore	Exp Value	Charge	MH+ [Da]	ΔM [ppm]	RT [min]	# Missed Cleavages
	High	VPQVSTPTLVEVSR	8	1	1	P02768		0	6.54392e+08	0	5.899e-05		52.7	6.57864e-05	2	1511.84	0.302953	37.1732	0
	High	KVPQVSTPTLVEVSR	13	1	1	P02768		0	9.08631e+08	0	0.0005024		43.5	0.000343946	2	1639.94	-0.613513	36.9514	1
	High	ccTESLVNR	20	1	1	P02768	C1(Methylthio); C2(Methylthio)	0	7.33704e+08	0	0.0001136		42.1	0.000104821	2	1116.43	0.0683347	32.5236	0
	High	YLYEIAR	10	1	1	P02768		0	2.69173e+08	0	0.0002067		36.16	0.00196103	2	927.494	0.257298	32.8751	0
	High	YIcENQDSISSK	7	1	1	P02768	C3(Methylthio)	0	1.86705e+09	0	0.001535		17.5	0.0604615	2	1432.61	0.249808	9.50077	0
P25705	ATP synthase subunit alpha, mitochondrial OS=Homo sapiens OX=9606 GN=ATP5F1A PE=1 SV=1 - [ATPA_HUMAN]	500.472	33.63	1	14	14	30	3.14577e+07	553	59.7136	9.12939	0.00336814
	A3	Sequence	# PSMs	# Proteins	# Protein Groups	Protein Group Accessions	Modifications	ΔCn	Area	q-Value	PEP		IonScore	Exp Value	Charge	MH+ [Da]	ΔM [ppm]	RT [min]	# Missed Cleavages
	High	EVAAFAQFGSDLDAATQQLLSR	6	1	1	P25705		0	3.78663e+06	0	9.586e-11		84.43	6.81494e-08	2	2338.16	-1.3374	63.6195	0
	High	TGTAEMSSILEER	2	1	1	P25705		0	2.57952e+07	0	1.018e-06		69.56	1.00149e-06	2	1423.67	-0.359731	37.6841	0
	High	TSIAIDTIINQK	2	1	1	P25705		0	2.46498e+07	0	1.755e-05		59.03	1.61283e-05	2	1316.74	-1.35131	41.3349	0
	High	VVDALGNAIDGK	2	1	1	P25705		0	2.22159e+07	0	6.057e-06		55.95	3.43031e-05	2	1171.63	0.278566	30.9101	0
	High	TGAIVDVPVGEELLGR	2	1	1	P25705		0	4.39282e+07	0	1.539e-05		50.83	0.00010532	2	1624.89	-0.457381	50.3322	0
	High	HALIIYDDLSK	2	1	1	P25705		0	1.67017e+07	0	1.914e-06		49.28	0.000167606	2	1287.69	-0.27489	36.8156	0
	High	NVQAEEMVEFSSGLK	2	1	1	P25705		0	1.0725e+07	0	1.523e-06		48.32	0.000170052	2	1667.8	1.17226	44.3283	0
	High	STVAQLVK	2	1	1	P25705		0	7.22816e+06	0	0.0003206		37.38	0.00193779	2	845.51	1.16746	24.0217	0
	High	EIVTNFLAGFEA	2	1	1	P25705		0	9.9677e+06	0	7.115e-05		35.66	0.00331406	2	1310.66	0.19087	60.6227	0
	High	GMSLNLEPDNVGVVVFGNDK	2	1	1	P25705		0	7.09113e+06	0	7.779e-06		33.6	0.00683147	2	2104.04	-0.192984	54.5321	0
	High	VLSIGDGIAR	2	1	1	P25705		0	1.02902e+07	0	0.001905		30.56	0.00914183	2	1000.58	-0.031437	32.9395	0
	High	LELAQYR	2	1	1	P25705		0	8.14886e+06	0	0.002324		24.78	0.0402518	2	892.489	0.722862	28.8094	0
	High	FENAFLSHVVSQHQALLGTIR	1	1	1	P25705		0	3.76532e+06	0	6.757e-05		13.95	0.622198	3	2367.25	-1.01028	52.8931	0
	High	QMSLLLR	1	1	1	P25705		0	5.16348e+06	0.001	0.01371		21.69	0.0891099	2	860.502	-0.113272	37.5341	0
P22626	Heterogeneous nuclear ribonucleoproteins A2/B1 OS=Homo sapiens OX=9606 GN=HNRNPA2B1 PE=1 SV=2 - [ROA2_HUMAN]	496.059	41.36	1	12	12	25	5.55375e+07	353	37.4067	8.95361	0.00280678
	A3	Sequence	# PSMs	# Proteins	# Protein Groups	Protein Group Accessions	Modifications	ΔCn	Area	q-Value	PEP		IonScore	Exp Value	Charge	MH+ [Da]	ΔM [ppm]	RT [min]	# Missed Cleavages
	High	LFIGGLSFETTEESLR	2	1	1	P22626		0	3.7363e+07	0	1.937e-09		85.53	3.90458e-08	2	1798.92	-0.855738	55.2972	0
	High	NMGGPYGGGNYGPGGSGGSGGYGGR	1	1	1	P22626		0	5.99492e+06	0	1.745e-09		70.89	2.68852e-07	2	2189.9	-0.955927	29.7856	0
	High	QEMQEVQSSR	3	1	1	P22626		0	6.35361e+07	0	3.385e-06		57.23	1.10702e-05	2	1221.55	-0.0813115	17.3414	0
	High	GGNFGFGDSR	2	1	1	P22626		0	2.46488e+07	0	0.0002885		44.29	0.000186196	2	1013.45	1.56466	27.9189	0
	High	IDTIEIITDR	2	1	1	P22626		0	6.57133e+07	0	1.31e-06		43.62	0.000714769	2	1188.65	0.856088	41.1496	0
	High	LTDcVVMR	2	1	1	P22626	C4(Methylthio)	0	3.33828e+07	0	0.0001145		42	0.000356491	2	982.452	0.350929	35.8401	0
	High	GFGFVTFDDHDPVDK	3	1	1	P22626		0	29548442	0	7.321e-07		39.76	0.000787329	2	1695.77	0.461956	45.9667	0
	High	QEmQEVQSSR	1	1	1	P22626	M3(Oxidation)	0	4.72288e+06	0	0.001075		30.59	0.00388472	2	1237.55	-0.607355	17.4489	0
	High	YHTINGHNAEVR	2	1	1	P22626		0	1.17219e+07	0	3.482e-05		30.05	0.0109729	2	1410.69	-0.185713	17.5226	0
	High	DYFEEYGK	2	1	1	P22626		0	5.60686e+06	0	0.001636		27.82	0.0044603	2	1050.44	-0.151861	32.4272	0
	High	GGGGNFGPGPGSNFR	2	1	1	P22626		0	3.16793e+07	0	0.001007		27.75	0.0108283	2	1377.63	-0.766341	28.4366	0
	High	TLETVPLER	2	1	1	P22626		0	7512359	0.002	0.03659		28.11	0.0206291	2	1057.58	-6.98084	29.3864	0
	High	NYYEQWGK	1	1	1	P22626		0	1.50012e+07	0.005	0.07256		11.73	0.315572	2	1087.48	-0.0466872	31.2163	0
P37268	Squalene synthase OS=Homo sapiens OX=9606 GN=FDFT1 PE=1 SV=1 - [FDFT_HUMAN]	491.705	29.5	1	10	10	19	1.36771e+07	417	48.0842	6.53662	0.00213315
	A3	Sequence	# PSMs	# Proteins	# Protein Groups	Protein Group Accessions	Modifications	ΔCn	Area	q-Value	PEP		IonScore	Exp Value	Charge	MH+ [Da]	ΔM [ppm]	RT [min]	# Missed Cleavages
	High	SFAAVIQALDGEMR	2	1	1	P37268		0	4.20496e+06	0	4.755e-10		80.03	1.51947e-07	2	1507.76	0.689202	59.4415	0
	High	MGIGMAEFLDK	2	1	1	P37268		0	1.01194e+07	0	8.022e-08		74.27	3.42311e-07	2	1211.58	-0.485315	50.0811	0
	High	MDQDSLSSSLK	2	1	1	P37268		0	1.44849e+07	0	3.392e-07		62.52	4.25416e-06	2	1210.56	0.208298	26.2904	0
	High	QVLEDFPTISLEFR	2	1	1	P37268		0	8.53668e+06	0	3.781e-08		60.41	1.33302e-05	2	1693.88	0.242745	57.0435	0
	High	LFSASEFEDPLVGEDTER	2	1	1	P37268		0	1.55251e+07	0	1.1e-06		48.04	0.000164888	2	2040.94	-1.3837	51.9627	0
	High	YQTVIADIcR	2	1	1	P37268	C9(Methylthio)	0	1.10215e+07	0	0.000296		38.61	0.00122572	2	1227.59	-0.0791808	51.4765	0
	High	TQNLPNcQLISR	2	1	1	P37268	C7(Methylthio)	0	1.01922e+07	0	2.185e-05		32.91	0.00606343	2	1432.7	-1.81962	42.1735	0
	High	DYLEDQQGGR	2	1	1	P37268		0	5.53849e+06	0	0.001208		31.95	0.00373384	2	1180.52	0.555575	21.5137	0
	High	HVTSEQEWDK	2	1	1	P37268		0	9.75781e+06	0	0.0001267		25.4	0.0183136	2	1258.57	-0.217408	19.6482	0
	High	AIIYQYMEEIYHR	1	1	1	P37268		0	6.15645e+06	0.002	0.02731		12.64	0.705131	3	1728.84	0.260731	52.4132	0
P62937	Peptidyl-prolyl cis-trans isomerase A OS=Homo sapiens OX=9606 GN=PPIA PE=1 SV=2 - [PPIA_HUMAN]	483.117	64.85	1	10	10	34	1.34671e+08	165	18.0009	7.81104	0.00381722
	A3	Sequence	# PSMs	# Proteins	# Protein Groups	Protein Group Accessions	Modifications	ΔCn	Area	q-Value	PEP		IonScore	Exp Value	Charge	MH+ [Da]	ΔM [ppm]	RT [min]	# Missed Cleavages
	High	VSFELFADK	4	1	1	P62937		0	5.55856e+07	0	2.273e-06		61.51	5.1208e-06	2	1055.54	0.210246	46.3927	0
	High	VNPTVFFDIAVDGEPLGR	7	1	1	P62937		0	3.783e+07	0	1.919e-07		53.33	8.40773e-05	2	1946	-0.581336	59.5617	0
	High	KITIADcGQLE	2	1	1	P62937	C7(Methylthio)	0	5.73206e+07	0	0.002331		48.68	0.000164656	2	1236.6	2.39242	44.1823	1
	High	FEDENFILK	4	1	1	P62937		0	2.09103e+08	0	3.46e-05		46.79	0.000199988	2	1154.57	0.0452768	41.3228	0
	High	EGmNIVEAMER	2	1	1	P62937	M3(Oxidation)	0	3.59682e+06	0	2.549e-05		39.96	0.000570228	2	1294.58	0.110867	33.5463	0
	High	EGMNIVEAMER	4	1	1	P62937		0	98605266	0	0.003416		33.18	0.00394288	2	1278.58	-0.236827	43.3101	0
	High	ITIADcGQLE	2	1	1	P62937	C6(Methylthio)	0	1.86306e+07	0	0.0005205		31.12	0.00575647	2	1108.5	0.245568	49.5262	0
	High	HTGPGILSMANAGPNTNGSQFFIcTAK	2	1	1	P62937	C24(Methylthio)	0	1.9182e+07	0	4.728e-08		26.99	0.0244983	3	2780.3	0.245799	54.4067	0
	High	mVNPTVFFDIAVDGEPLGR	2	1	1	P62937	N-Term(Acetyl)	0	6.20114e+06	0	4.431e-05		26.84	0.0377801	2	2119.05	0.484356	65.4104	0
	High	IIPGFMcQGGDFTR	2	1	1	P62937	C7(Methylthio)	0	9.63052e+07	0	2.802e-05		19.5	0.0892005	2	1587.71	0.522584	52.9887	0
	High	vNPTVFFDIAVDGEPLGR	1	1	1	P62937	N-Term(Acetyl)	0	1.08271e+07	0	0.00244		11.06	1.31616	2	1988.01	0.134109	64.7722	0
	High	TEWLDGK	2	1	1	P62937		0	5.91036e+07	0.001	0.006084		31.93	0.00593119	2	848.415	0.00265882	27.2988	0
P17987	T-complex protein 1 subunit alpha OS=Homo sapiens OX=9606 GN=TCP1 PE=1 SV=1 - [TCPA_HUMAN]	480.03	39.03	1	17	17	31	1.01887e+07	556	60.3056	6.11279	0.00348041
	A3	Sequence	# PSMs	# Proteins	# Protein Groups	Protein Group Accessions	Modifications	ΔCn	Area	q-Value	PEP		IonScore	Exp Value	Charge	MH+ [Da]	ΔM [ppm]	RT [min]	# Missed Cleavages
	High	EVGDGTTSVVIIAAELLK	3	1	1	P17987		0	4.99672e+06	0	4.686e-12		100.11	1.16024e-09	2	1815.01	-0.962175	61.9526	0
	High	MLVDDIGDVTITNDGATILK	2	1	1	P17987		0	1.02372e+07	0	1.456e-09		82.44	9.80683e-08	2	2104.08	-0.722419	53.2584	0
	High	ILATGANVILTTGGIDDMcLK	2	1	1	P17987	C19(Methylthio)	0	5.41339e+06	0	3.198e-08		51.85	0.000104827	2	2165.1	-0.212684	58.0093	0
	High	LGVQVVITDPEK	1	1	1	P17987		0	5.45518e+06	0	0.0001428		40.09	0.000803182	2	1297.74	-0.946534	37.1351	0
	High	HGSYEDAVHSGALND	2	1	1	P17987		0	1.1588e+07	0	6.403e-05		38.3	0.000502897	2	1571.67	-0.0614829	24.2432	0
	High	SQNVMAAASIANIVK	2	1	1	P17987		0	8.74087e+06	0	3.41e-06		37.92	0.0023166	2	1516.81	-0.508023	45.6027	0
	High	LLEVEHPAAK	2	1	1	P17987		0	4838853	0	2.79e-05		36.16	0.00233629	2	1106.62	0.0358724	21.0202	0
	High	QAGVFEPTIVK	2	1	1	P17987		0	6.89413e+06	0	0.0001638		32.83	0.0075052	2	1188.66	-0.582678	35.2877	0
	High	IcDDELILIK	2	1	1	P17987	C2(Methylthio)	0	7.50384e+06	0	0.0001516		31	0.0127887	2	1220.63	0.0509679	51.3521	0
	High	FATEAAITILR	2	1	1	P17987		0	5.01362e+06	0	5.99e-06		30.23	0.00934192	2	1205.69	-0.0173576	44.7265	0
	High	GANDFMcDEMER	1	1	1	P17987	C7(Methylthio)	0	7.3657e+06	0	0.0007555		26.91	0.00203222	2	1463.5	-1.00455	43.2466	0
	High	VLcELADLQDK	2	1	1	P17987	C3(Methylthio)	0	5.60891e+06	0	3.253e-05		25.6	0.0312605	2	1292.62	-2.03591	47.7033	0
	High	EQLAIAEFAR	2	1	1	P17987		0	4881834	0	0.0007777		24.77	0.0491804	2	1147.61	1.68622	41.694	0
	High	mEGPLSVFGDR	2	1	1	P17987	N-Term(Acetyl)	0	7.36189e+06	0	0.001041		22.1	0.0573433	2	1249.59	0.0625283	56.7404	0
	High	IAcLDFSLQK	1	1	1	P17987	C3(Methylthio)	0	4.1115e+06	0	0.0007163		13.03	0.597285	2	1183.59	0.495602	52.3449	0
	High	YPVNSVNILK	1	1	1	P17987		0	8.26444e+06	0.001	0.009878		12.92	0.543688	2	1146.65	-0.523834	36.1988	0
	High	SSLGPVGLDK	2	1	1	P17987		0	6.97908e+06	0.002	0.02934		24.96	0.0344686	2	972.535	-0.786996	27.8735	0
P50990	T-complex protein 1 subunit theta OS=Homo sapiens OX=9606 GN=CCT8 PE=1 SV=4 - [TCPQ_HUMAN]	477.295	39.96	1	19	19	33	1.38048e+07	548	59.5825	5.60498	0.00370495
	A3	Sequence	# PSMs	# Proteins	# Protein Groups	Protein Group Accessions	Modifications	ΔCn	Area	q-Value	PEP		IonScore	Exp Value	Charge	MH+ [Da]	ΔM [ppm]	RT [min]	# Missed Cleavages
	High	AIADTGANVVVTGGK	2	1	1	P50990		0	1.68996e+07	0	3.267e-07		60.44	1.31481e-05	2	1372.74	-0.311726	26.2846	0
	High	IGLSVSEVIEGYEIAcR	2	1	1	P50990	C16(Methylthio)	0	925965	0	2.841e-10		60.27	1.30152e-05	2	1883.92	-0.837231	62.5018	0
	High	NVGLDIEAEVPAVK	2	1	1	P50990		0	9.65585e+06	0	2.411e-08		53.79	5.01396e-05	2	1453.79	-1.71432	45.1462	0
	High	LFVTNDAATILR	2	1	1	P50990		0	1.48587e+07	0	6.06e-07		51.5	8.99091e-05	2	1333.75	-0.737577	45.2643	0
	High	FAEAFEAIPR	2	1	1	P50990		0	6.83843e+06	0	7.732e-07		49.74	0.000114663	2	1150.59	-0.355109	40.8894	0
	High	EDGAISTIVLR	2	1	1	P50990		0	3.65941e+06	0	1.428e-05		33.2	0.00825637	2	1173.65	0.889362	37.8194	0
	High	TAEELMNFSK	2	1	1	P50990		0	3.79366e+06	0	4.458e-05		32.83	0.00497741	2	1169.55	-0.150991	34.925	0
	High	TVGATALPR	1	1	1	P50990		0	5.23281e+06	0	0.003092		32.06	0.00357823	2	885.517	2.36052	22.1066	0
	High	VADMALHYANK	2	1	1	P50990		0	7.80046e+06	0	0.0009389		30.36	0.00980279	2	1232.61	-1.1647	24.9544	0
	High	AVDDGVNTFK	2	1	1	P50990		0	9656067	0	0.0005047		28.99	0.0129968	2	1065.52	-0.578017	24.3545	0
	High	APGFAQMLK	2	1	1	P50990		0	5.53329e+06	0	0.001144		28	0.0225847	2	962.512	-1.20101	38.3373	0
	High	ETEGDVTSVK	1	1	1	P50990		0	2.89656e+06	0	0.00134		28	0.0160867	2	1064.51	1.26743	17.7141	0
	High	LATNAAVTVLR	2	1	1	P50990		0	5.51363e+06	0	0.000601		25.45	0.0297931	2	1128.67	-1.47846	31.3468	0
	High	GSTDNLMDDIER	2	1	1	P50990		0	7.16295e+06	0	0.0001204		25.09	0.0136286	2	1365.59	-1.088	37.6397	0
	High	DIDEVSSLLR	1	1	1	P50990		0	4.3328e+06	0	0.002919		20	0.151	2	1146.6	0.207654	44.7377	0
	High	QITSYGETcPGLEQYAIK	2	1	1	P50990	C9(Methylthio)	0	8.27411e+06	0	2.041e-05		19.55	0.1148	2	2046.95	-1.15989	49.7797	0
	High	ELEVQHPAAK	2	1	1	P50990		0	4.01101e+06	0.001	0.01033		22.5	0.0826642	2	1121.6	0.232831	17.8915	0
	High	QYGNEVFLAK	1	1	1	P50990		0	3.78396e+06	0.001	0.005692		13.33	0.555096	2	1168.6	-0.176619	32.9476	0
	High	TAYGPNGMNK	1	1	1	P50990		0	2.18695e+06	0.004	0.05696		18.96	0.0914813	2	1052.48	-0.853256	19.5549	0
P37802	Transgelin-2 OS=Homo sapiens OX=9606 GN=TAGLN2 PE=1 SV=3 - [TAGL2_HUMAN]	472.841	65.33	1	10	10	21	1.91988e+07	199	22.3772	8.25049	0.0023577
	A3	Sequence	# PSMs	# Proteins	# Protein Groups	Protein Group Accessions	Modifications	ΔCn	Area	q-Value	PEP		IonScore	Exp Value	Charge	MH+ [Da]	ΔM [ppm]	RT [min]	# Missed Cleavages
	High	YGINTTDIFQTVDLWEGK	3	1	1	P37802		0	1.22901e+07	0	6.181e-11		101.81	1.09752e-09	2	2100.03	0.173756	60.8681	0
	High	QMEQISQFLQAAER	4	1	1	P37802		0	1.0534e+07	0	3.049e-09		83.33	6.41031e-08	2	1678.82	0.15355	52.3894	0
	High	TLMNLGGLAVAR	2	1	1	P37802		0	1.26548e+07	0	2.519e-07		58.75	1.6469e-05	2	1215.69	-0.977385	45.8228	0
	High	NFSDNQLQEGK	2	1	1	P37802		0	2.81949e+07	0	1.001e-05		48.59	0.00012037	2	1279.59	-1.44278	22.6453	0
	High	DDGLFSGDPNWFPK	2	1	1	P37802		0	1.67466e+07	0	1.381e-05		38.53	0.000967941	2	1594.71	-1.53002	54.9357	0
	High	DGTVLcELINALYPEGQAPVK	3	1	1	P37802	C6(Methylthio)	0	3.50625e+06	0	1.715e-07		38.28	0.00244436	3	2276.13	-0.080516	65.302	0
	High	GASQAGMTGYGMPR	2	1	1	P37802		0	5.88716e+06	0	9.437e-05		24.93	0.0181572	2	1383.61	0.0637836	28.1575	0
	High	NMAcVQR	1	1	1	P37802	C4(Methylthio)	0	5.6526e+06	0.001	0.01525		15.94	0.0878656	2	867.363	-0.811428	22.0579	0
	High	NVIGLQMGTNR	1	1	1	P37802		0	0	0.001	0.006262		14.34	0.603732	2	1202.63	2.0881	32.9106	0
	High	ENFQNWLK	1	1	1	P37802		0	5.83284e+06	0.003	0.04271		13.92	0.517023	2	1078.53	-0.563583	43.091	0
Q07065	Cytoskeleton-associated protein 4 OS=Homo sapiens OX=9606 GN=CKAP4 PE=1 SV=2 - [CKAP4_HUMAN]	456.732	37.21	1	17	17	33	1.89193e+07	602	65.9827	5.92236	0.00370495
	A3	Sequence	# PSMs	# Proteins	# Protein Groups	Protein Group Accessions	Modifications	ΔCn	Area	q-Value	PEP		IonScore	Exp Value	Charge	MH+ [Da]	ΔM [ppm]	RT [min]	# Missed Cleavages
	High	LEGLGSSEADQDGLASTVR	2	1	1	Q07065		0	1.83578e+07	0	6.258e-09		89.62	1.4025e-08	2	1904.92	0.402355	35.1798	0
	High	VASLEESEGNK	2	1	1	Q07065		0	2.85094e+06	0	2.352e-06		56.66	1.85566e-05	2	1162.56	-1.18938	18.1719	0
	High	VASLEESEGNKQDLK	2	1	1	Q07065		0	4.79712e+06	0	0.0003432		51.09	0.000118262	2	1646.82	-1.45913	20.2861	1
	High	VQSLQATFGTFESILR	2	1	1	Q07065		0	2.6088e+06	0	8.197e-08		48.81	0.00014599	2	1796.96	2.00893	60.255	0
	High	EELGQGLQGVEQK	2	1	1	Q07065		0	6.96277e+06	0	3.786e-05		42.17	0.00075842	2	1414.72	-0.94105	28.4824	0
	High	ASVSQVEADLK	2	1	1	Q07065		0	5.61967e+06	0	0.002246		41.5	0.000888472	2	1146.6	-1.60222	30.7433	0
	High	SVGELPSTVESLQK	2	1	1	Q07065		0	1.62186e+07	0	8.429e-05		40.56	0.00132293	2	1473.77	-6.70416	36.0148	0
	High	VQEQVHTLLSQDQAQAAR	3	1	1	Q07065		0	2.21815e+07	0	1.294e-06		39.62	0.00180633	2	2022.04	0.811145	28.2185	0
	High	HSEAFEALQQK	2	1	1	Q07065		0	1.16866e+07	0	7.355e-05		33.6	0.00438698	2	1287.63	0.0145995	24.3639	0
	High	QTESLESLLSK	2	1	1	Q07065		0	6.79018e+06	0	0.0006568		32.63	0.00884128	2	1234.65	0.74408	42.9668	0
	High	STLQTMESDIYTEVR	2	1	1	Q07065		0	1.04197e+07	0	0.0005773		17.81	0.167233	2	1772.83	-1.90851	50.1573	0
	High	LQHVEDGVLSMQVASAR	2	1	1	Q07065		0	4.20889e+06	0	0.0001975		17.64	0.267751	3	1839.94	-0.323423	35.6339	0
	High	SINDNIAIFTEVQK	2	1	1	Q07065		0	1.05207e+07	0	0.001503		17.43	0.251197	2	1591.84	1.69204	47.2255	0
	High	DFTSLENTVEER	2	1	1	Q07065		0	7.07352e+06	0	9.186e-05		17.08	0.159646	2	1439.66	-2.0188	40.3538	0
	High	SSSSSSASAAAAAAAASSSAScSR	1	1	1	Q07065	C22(Methylthio)	0	4.41616e+06	0	0.001613		11.91	0.209355	2	2078.87	0.916994	31.176	0
	High	RLEEELR	1	1	1	Q07065		0	3.13917e+06	0.001	0.01265		32.56	0.00596223	2	944.516	0.406261	19.5911	1
	High	LQNEILK	2	1	1	Q07065		0	5.44665e+06	0.002	0.02262		23.72	0.0312095	2	857.51	0.439351	23.6834	0
P61981	14-3-3 protein gamma OS=Homo sapiens OX=9606 GN=YWHAG PE=1 SV=2 - [1433G_HUMAN]	436.265	51.82	1	7	11	29	1.13e+08	247	28.2849	4.89404	0.00325587
	A3	Sequence	# PSMs	# Proteins	# Protein Groups	Protein Group Accessions	Modifications	ΔCn	Area	q-Value	PEP		IonScore	Exp Value	Charge	MH+ [Da]	ΔM [ppm]	RT [min]	# Missed Cleavages
	High	TAFDDAIAELDTLNEDSYK	4	1	1	P61981		0	1.50649e+07	0	5.819e-08		64.42	3.48761e-06	2	2130.96	-3.87568	57.836	0
	High	DSTLIMQLLR	4	7	7	P31946;P62258;Q04917;P61981;P31947;P27348;P63104		0	1.74328e+08	0	2.204e-06		55.97	3.30073e-05	2	1189.66	-0.0378506	56.6624	0
	High	DSTLImQLLR	2	7	7	P31946;P62258;Q04917;P61981;P31947;P27348;P63104	M6(Oxidation)	0	3.09617e+06	0	2.822e-06		54.78	5.18949e-05	2	1205.65	-1.99586	53.4269	0
	High	NVTELNEPLSNEER	2	1	1	P61981		0	50203738	0	8.769e-07		54.35	3.98501e-05	2	1643.79	0.350426	29.6566	0
	High	AYSEAHEISK	2	1	1	P61981		0	1.08322e+07	0	0.0002361		45.8	0.000273548	2	1134.54	0.0342321	17.3272	0
	High	YDDMAAAMK	2	2	2	P31946;P61981		0	2.14171e+07	0	8.215e-06		38.17	0.000365773	2	1015.42	0.319823	24.6704	0
	High	YLAEVATGEK	2	1	1	P61981		0	1.44212e+07	0	9.539e-05		33.99	0.0047883	2	1080.56	0.645617	23.6103	0
	High	NcSETQYESK	1	1	1	P61981	C2(Methylthio)	0	1.29219e+07	0	0.0007769		25.83	0.00287338	2	1234.47	-0.402954	19.9253	0
	High	DNLTLWTSDQQDDDGGEGNN	2	1	1	P61981		0	6.21837e+06	0	0.001727		11.48	0.145799	2	2193.88	-1.1049	42.5041	0
	High	NLLSVAYK	4	7	7	P31946;P62258;Q04917;P61981;P31947;P27348;P63104		0	1.14469e+08	0.001	0.01476		25.97	0.0136582	2	907.525	0.331355	35.7891	0
	High	VISSIEQK	3	4	5	P31946;Q04917;P61981;P27348;P31947		0	4.314e+07	0.001	0.01517		14.89	0.431372	2	903.514	-0.24398	19.089	0
	High	EHMQPTHPIR	1	1	1	P61981		0	1.46042e+06	0.003	0.04392		14.4	0.383047	2	1245.62	0.211217	16.6619	0
P19338	Nucleolin OS=Homo sapiens OX=9606 GN=NCL PE=1 SV=3 - [NUCL_HUMAN]	433.172	21.83	1	12	12	23	2.61639e+07	710	76.5684	4.70361	0.00258224
	A3	Sequence	# PSMs	# Proteins	# Protein Groups	Protein Group Accessions	Modifications	ΔCn	Area	q-Value	PEP		IonScore	Exp Value	Charge	MH+ [Da]	ΔM [ppm]	RT [min]	# Missed Cleavages
	High	TLVLSNLSYSATEETLQEVFEK	2	1	1	P19338		0	4.42173e+06	0	5.26e-09		82.48	9.99938e-08	2	2501.27	0.229372	60.8906	0
	High	NDLAVVDVR	2	1	1	P19338		0	8.48954e+06	0	3.358e-05		54.05	3.77808e-05	2	1000.54	-0.201405	30.4443	0
	High	VEGTEPTTAFNLFVGNLNFNK	3	1	1	P19338		0	6.59233e+06	0	4.164e-08		46.96	0.00031112	2	2312.16	0.619708	59.6303	0
	High	GLSEDTTEETLK	2	1	1	P19338		0	3.49045e+07	0	3.611e-05		45.87	0.00031835	2	1322.63	0.467854	24.2924	0
	High	EVFEDAAEIR	2	1	1	P19338		0	1.15634e+07	0	0.0002694		45.69	0.000308891	2	1178.57	-0.0747647	32.9356	0
	High	FGYVDFESAEDLEK	2	1	1	P19338		0	1.93412e+07	0	5.951e-05		36.44	0.00143001	2	1648.74	-1.44483	48.1447	0
	High	GYAFIEFASFEDAK	2	1	1	P19338		0	4.07045e+06	0	1.253e-06		36.21	0.00240528	2	1594.74	-0.301204	56.113	0
	High	TGISDVFAK	2	1	1	P19338		0	5.64515e+06	0	9.859e-05		34.94	0.00248486	2	937.497	-2.23737	34.1799	0
	High	EAMEDGEIDGNK	1	1	1	P19338		0	2.25787e+07	0	0.0004345		31.31	0.0024407	2	1307.54	-0.397536	20.2473	0
	High	ALELTGLK	2	1	1	P19338		0	3.3938e+06	0	0.003441		25.37	0.0242486	2	844.512	-2.08255	33.6118	0
	High	GFGFVDFNSEEDAK	1	1	1	P19338		0	2.10084e+07	0	0.0003845		23.1	0.0237543	2	1561.68	-1.03006	46.9246	0
	High	SISLYYTGEK	2	1	1	P19338		0	5.98416e+06	0.001	0.004672		22.81	0.0649265	2	1160.58	-1.66537	34.1712	0
P31946	14-3-3 protein beta/alpha OS=Homo sapiens OX=9606 GN=YWHAB PE=1 SV=3 - [1433B_HUMAN]	429.081	60.16	1	6	11	29	1.10646e+08	246	28.0648	4.83057	0.00325587
	A3	Sequence	# PSMs	# Proteins	# Protein Groups	Protein Group Accessions	Modifications	ΔCn	Area	q-Value	PEP		IonScore	Exp Value	Charge	MH+ [Da]	ΔM [ppm]	RT [min]	# Missed Cleavages
	High	AVTEQGHELSNEER	3	1	1	P31946		0	3.62456e+07	0	4.345e-07		57.77	1.45385e-05	2	1598.74	-0.868159	18.2971	0
	High	DSTLIMQLLR	4	7	7	P31946;P62258;Q04917;P61981;P31947;P27348;P63104		0	1.74328e+08	0	2.204e-06		55.97	3.30073e-05	2	1189.66	-0.0378506	56.6624	0
	High	DSTLImQLLR	2	7	7	P31946;P62258;Q04917;P61981;P31947;P27348;P63104	M6(Oxidation)	0	3.09617e+06	0	2.822e-06		54.78	5.18949e-05	2	1205.65	-1.99586	53.4269	0
	High	IEAELQDIcNDVLELLDK	1	1	1	P31946	C9(Methylthio)	0	165411	0	3.408e-07		53.42	7.34806e-05	2	2119.03	-0.465358	67.8056	0
	High	TAFDEAIAELDTLNEESYK	3	1	1	P31946		0	2.33001e+07	0	5.086e-08		50.45	0.00010323	2	2159	-0.116857	58.5193	0
	High	EMQPTHPIR	2	3	3	P31946;P27348;P63104		0	2.6695e+07	0	0.001864		38.9	0.00153946	2	1108.56	0.522612	17.8733	0
	High	YDDMAAAMK	2	2	2	P31946;P61981		0	2.14171e+07	0	8.215e-06		38.17	0.000365773	2	1015.42	0.319823	24.6704	0
	High	QTTVSNSQQAYQEAFEISK	2	1	1	P31946		0	2.51071e+07	0	3.503e-05		36.85	0.00293284	2	2159.03	1.47595	39.0282	0
	High	YLIPNATQPESK	2	1	1	P31946		0	2.67502e+07	0	0.0006891		31.01	0.0116498	2	1360.71	-0.187022	29.6743	0
	High	DNLTLWTSENQGDEGDAGEGEN	1	1	1	P31946		0	4.63535e+06	0	0.002626		11.2	0.182059	2	2350.95	-1.31514	42.8136	0
	High	NLLSVAYK	4	7	7	P31946;P62258;Q04917;P61981;P31947;P27348;P63104		0	1.14469e+08	0.001	0.01476		25.97	0.0136582	2	907.525	0.331355	35.7891	0
	High	VISSIEQK	3	4	5	P31946;Q04917;P61981;P27348;P31947		0	4.314e+07	0.001	0.01517		14.89	0.431372	2	903.514	-0.24398	19.089	0
P06748	Nucleophosmin OS=Homo sapiens OX=9606 GN=NPM1 PE=1 SV=2 - [NPM_HUMAN]	420.598	36.39	1	6	6	20	5.49981e+07	294	32.5548	4.77979	0.00224542
	A3	Sequence	# PSMs	# Proteins	# Protein Groups	Protein Group Accessions	Modifications	ΔCn	Area	q-Value	PEP		IonScore	Exp Value	Charge	MH+ [Da]	ΔM [ppm]	RT [min]	# Missed Cleavages
	High	MTDQEAIQDLWQWR	4	1	1	P06748		0	2.73397e+07	0	3.394e-07		60.11	1.01886e-05	2	1819.84	-0.319991	57.713	0
	High	DELHIVEAEAMNYEGSPIK	4	1	1	P06748		0	4.27639e+07	0	1.295e-09		58.38	2.08378e-05	2	2145.01	-1.05606	51.2275	0
	High	VDNDENEHQLSLR	4	1	1	P06748		0	7.56561e+07	0	1.585e-06		57.81	1.69716e-05	2	1568.73	0.639581	22.1662	0
	High	GPSSVEDIK	2	1	1	P06748		0	4.65744e+07	0	0.0003278		57.17	1.98582e-05	2	931.468	-5.3948	19.8285	0
	High	MSVQPTVSLGGFEITPPVVLR	3	1	1	P06748		0	4.10291e+07	0	8.312e-07		45.4	0.000307149	2	2227.21	-0.437359	58.7233	0
	High	mTDQEAIQDLWQWR	1	1	1	P06748	M1(Oxidation)	0	1.97117e+06	0	4.532e-05		23.52	0.0369044	2	1835.84	0.125395	55.5826	0
	High	cGSGPVHISGQHLVAVEEDAESEDEEEEDVK	2	1	1	P06748	C1(Methylthio)	0	9.92043e+06	0	0.0001691		20.23	0.0436272	3	3369.43	-0.723207	39.3186	0
P09382	Galectin-1 OS=Homo sapiens OX=9606 GN=LGALS1 PE=1 SV=2 - [LEG1_HUMAN]	419.901	83.7	1	8	8	20	3.88968e+07	135	14.7062	5.50342	0.00224542
	A3	Sequence	# PSMs	# Proteins	# Protein Groups	Protein Group Accessions	Modifications	ΔCn	Area	q-Value	PEP		IonScore	Exp Value	Charge	MH+ [Da]	ΔM [ppm]	RT [min]	# Missed Cleavages
	High	LNLEAINYMAADGDFK	2	1	1	P09382		0	3.31106e+07	0	5.062e-12		108.04	1.9394e-10	2	1784.85	-0.402908	53.0599	0
	High	acGLVASNLNLKPGEcLR	5	1	1	P09382	N-Term(Acetyl); C2(Methylthio); C16(Methylthio)	0	4.88132e+07	0	1.619e-08		60.82	1.29159e-05	2	1991.95	0.162981	58.9844	0
	High	DGGAWGTEQR	2	1	1	P09382		0	1.41527e+07	0	0.0008921		41.16	0.000333035	2	1076.48	-0.215429	21.335	0
	High	SFVLNLGK	2	1	1	P09382		0	1.12921e+07	0	0.0007433		41.03	0.000343154	2	877.513	-0.989201	40.195	0
	High	FNAHGDANTIVcNSK	4	1	1	P09382	C12(Methylthio)	0	3.47666e+07	0	0.0008381		34.01	0.00228385	2	1636.72	-2.35705	27.7567	0
	High	DSNNLcLHFNPR	2	1	1	P09382	C6(Methylthio)	0	2.10176e+07	0	8.321e-05		30.82	0.0043467	3	1475.65	0.563341	41.0392	0
	High	LPDGYEFK	2	1	1	P09382		0	1.99808e+07	0	0.0005162		23.16	0.0335726	2	968.472	-0.895348	31.7553	0
	High	EAVFPFQPGSVAEVcITFDQANLTVK	1	1	1	P09382	C15(Methylthio)	0	1.99599e+06	0.007	0.1146		10.04	1.82808	3	2856.39	-0.0829359	64.8458	0
O60814	Histone H2B type 1-K OS=Homo sapiens OX=9606 GN=H2BC12 PE=1 SV=3 - [H2B1K_HUMAN]	414.924	35.71	9	2	5	13	1.40909e+08	126	13.8816	10.3159	0.00145953
	A3	Sequence	# PSMs	# Proteins	# Protein Groups	Protein Group Accessions	Modifications	ΔCn	Area	q-Value	PEP		IonScore	Exp Value	Charge	MH+ [Da]	ΔM [ppm]	RT [min]	# Missed Cleavages
	High	AmGIMNSFVNDIFER	4	14	2	P06899;O60814	M2(Oxidation)	0	1.69633e+07	0	1.862e-08		82.44	5.58761e-08	2	1759.82	0.526672	58.8606	0
	High	AMGIMNSFVNDIFER	4	14	2	P06899;O60814		0	1.2026e+08	0	1.155e-08		81.24	8.3806e-08	2	1743.82	-0.284459	60.8704	0
	High	LLLPGELAK	1	14	2	P06899;O60814		0	1.85529e+08	0	0.002121		29.81	0.00255956	2	953.605	1.88093	39.045	0
	High	KESYSVYVYK	2	9	1	O60814		0	3.48011e+07	0	0.00219		29.41	0.0155217	2	1265.64	-1.12449	28.2514	1
	High	QVHPDTGISSK	1	14	2	P06899;O60814		0	1.16938e+08	0.001	0.01226		33.58	0.00535007	2	1168.6	-0.0792803	16.5118	0
	High	ESYSVYVYK	1	9	1	O60814		0	2.82004e+07	0.001	0.01365		19.14	0.127994	2	1137.54	-1.25173	32.8172	0
P52209	6-phosphogluconate dehydrogenase, decarboxylating OS=Homo sapiens OX=9606 GN=PGD PE=1 SV=3 - [6PGD_HUMAN]	414.148	27.12	1	10	10	21	1.38043e+07	483	53.106	7.2251	0.0023577
	A3	Sequence	# PSMs	# Proteins	# Protein Groups	Protein Group Accessions	Modifications	ΔCn	Area	q-Value	PEP		IonScore	Exp Value	Charge	MH+ [Da]	ΔM [ppm]	RT [min]	# Missed Cleavages
	High	DVLGMAQDEMAQAFEDWNK	2	1	1	P52209		0	1.46799e+06	0	4.59358e-13		95.61	1.88231e-09	2	2197.95	0.295539	63.7988	0
	High	NPELQNLLLDDFFK	4	1	1	P52209		0	9.0531e+06	0	1.3e-08		63.23	6.84483e-06	2	1705.88	0.0979207	63.6329	0
	High	LVPLLDTGDIIIDGGNSEYR	2	1	1	P52209		0	1.015e+07	0	1.268e-09		52.68	0.000101968	2	2160.12	-0.196183	56.2316	0
	High	VDDFLANEAK	2	1	1	P52209		0	1.30362e+07	0	0.0002683		48.52	0.000194738	2	1121.54	-7.05726	30.6057	0
	High	AGQAVDDFIEK	2	1	1	P52209		0	9.0168e+06	0	0.0003983		32.93	0.00659583	2	1192.58	-0.299565	31.4562	0
	High	SAVENcQDSWR	2	1	1	P52209	C6(Methylthio)	0	1.02424e+07	0	0.0002358		29.76	0.00163807	2	1340.54	-0.301604	33.0764	0
	High	TIFQGIAAK	1	1	1	P52209		0	6.25999e+06	0	0.001183		29.23	0.00632814	2	948.551	-0.604592	32.8333	0
	High	GILFVGSGVSGGEEGAR	2	1	1	P52209		0	1.81342e+07	0	3.298e-05		26.08	0.0394566	2	1591.81	-0.241735	40.7935	0
	High	HEMLPASLIQAQR	2	1	1	P52209		0	6.81429e+06	0	2.957e-05		22	0.0984293	2	1493.79	-0.426708	36.9538	0
	High	SFLEDIR	2	1	1	P52209		0	2.94642e+06	0.001	0.01842		19.84	0.105309	2	879.456	-0.78894	38.8029	0
P60842	Eukaryotic initiation factor 4A-I OS=Homo sapiens OX=9606 GN=EIF4A1 PE=1 SV=1 - [IF4A1_HUMAN]	409.905	48.77	1	14	17	33	2.92975e+07	406	46.1246	5.47803	0.00370495
	A3	Sequence	# PSMs	# Proteins	# Protein Groups	Protein Group Accessions	Modifications	ΔCn	Area	q-Value	PEP		IonScore	Exp Value	Charge	MH+ [Da]	ΔM [ppm]	RT [min]	# Missed Cleavages
	High	MFVLDEADEMLSR	2	1	1	P60842		0	1.8302e+07	0	4.22e-10		88.84	1.2278e-08	2	1555.71	0.0727221	54.5955	0
	High	GIDVQQVSLVINYDLPTNR	2	1	1	P60842		0	5.2618e+06	0	1.492e-07		41.96	0.00100295	2	2144.13	0.0568638	54.4196	0
	High	LNSNTQVVLLSATMPSDVLEVTK	2	1	1	P60842		0	9.47694e+06	0	1.294e-06		38.67	0.00198993	2	2459.31	0.0661907	55.7304	0
	High	GVAINMVTEEDKR	2	1	1	P60842		0	7.30077e+06	0	0.001149		37.25	0.00277838	2	1461.74	-0.967486	28.3281	1
	High	VFDMLNR	2	1	1	P60842		0	8.83074e+06	0	0.000999		37.11	0.00209126	2	894.45	0.058859	34.7982	0
	High	ELAQQIQK	2	1	1	P60842		0	1.30709e+07	0	0.00227		36.68	0.00191157	2	957.536	-0.559838	19.0351	0
	High	DQIYDIFQK	1	1	1	P60842		0	8.49967e+06	0	0.001477		36.06	0.00273755	2	1169.58	-1.32559	45.2623	0
	High	GYDVIAQAQSGTGK	2	1	1	P60842		0	4.56659e+07	0	4.757e-05		34.34	0.00432552	2	1394.69	-2.0157	27.7547	0
	High	LQMEAPHIIVGTPGR	3	1	1	P60842		0	1.43161e+07	0	1.52e-05		32.53	0.00893552	2	1618.87	-0.980639	38.448	0
	High	ATQALVLAPTR	2	1	1	P60842		0	1.52443e+07	0	0.0003188		32.16	0.0031319	2	1140.67	-0.820813	29.2611	0
	High	VLITTDLLAR	2	1	1	P60842		0	1.48889e+07	0	0.000533		29.2	0.00823551	2	1114.68	-7.17238	44.6657	0
	High	DFTVSAMHGDMDQK	2	1	1	P60842		0	1.37086e+07	0	4.637e-06		28.67	0.00353161	2	1581.67	0.844298	31.1785	0
	High	QFYINVER	2	1	1	P60842		0	1.12152e+07	0	0.0004447		28.38	0.0146663	2	1068.55	-0.0116891	36.2916	0
	High	GIYAYGFEKPSAIQQR	3	2	2	P60842;P38919		0	9.56201e+06	0	0.0001164		28.26	0.0223173	3	1827.94	-0.965238	36.8277	0
	High	VDWLTEK	2	2	2	P60842;P38919		0	1.99041e+06	0.001	0.007665		12.85	0.71335	2	890.462	0.19248	34.6178	0
	High	KEELTLEGIR	1	1	1	P60842		0	2.39246e+07	0.002	0.02591		18	0.230602	2	1187.66	-0.170001	31.2182	1
	High	KVDWLTEK	1	2	2	P60842;P38919		0	7.79112e+06	0.004	0.06854		26.77	0.0287166	2	1018.56	0.0491177	28.9826	1
P27348	14-3-3 protein theta OS=Homo sapiens OX=9606 GN=YWHAQ PE=1 SV=1 - [1433T_HUMAN]	400.462	53.06	1	7	11	29	1.10646e+08	245	27.7468	4.77979	0.00325587
	A3	Sequence	# PSMs	# Proteins	# Protein Groups	Protein Group Accessions	Modifications	ΔCn	Area	q-Value	PEP		IonScore	Exp Value	Charge	MH+ [Da]	ΔM [ppm]	RT [min]	# Missed Cleavages
	High	SIcTTVLELLDK	2	1	1	P27348	C3(Methylthio)	0	2.5284e+06	0	2.059e-08		76.25	3.74677e-07	2	1380.71	-0.626839	66.6845	0
	High	DSTLIMQLLR	4	7	7	P31946;P62258;Q04917;P61981;P31947;P27348;P63104		0	1.74328e+08	0	2.204e-06		55.97	3.30073e-05	2	1189.66	-0.0378506	56.6624	0
	High	DSTLImQLLR	2	7	7	P31946;P62258;Q04917;P61981;P31947;P27348;P63104	M6(Oxidation)	0	3.09617e+06	0	2.822e-06		54.78	5.18949e-05	2	1205.65	-1.99586	53.4269	0
	High	AVTEQGAELSNEER	2	1	1	P27348		0	2.56605e+07	0	1.191e-06		45.23	0.000298417	2	1532.72	1.84242	21.4039	0
	High	YLIANATNPESK	2	1	1	P27348		0	1.59522e+07	0	1.087e-05		41.16	0.00126323	2	1320.68	-0.524551	26.8052	0
	High	EMQPTHPIR	2	3	3	P31946;P27348;P63104		0	2.6695e+07	0	0.001864		38.9	0.00153946	2	1108.56	0.522612	17.8733	0
	High	TAFDEAIAELDTLNEDSYK	3	1	1	P27348		0	1.4958e+07	0	8.979e-09		38.2	0.00189952	2	2144.99	-0.447423	58.4115	0
	High	YDDMATcMK	2	1	1	P27348	C7(Methylthio)	0	4.14974e+06	0	0.0009811		28.8	0.00158191	2	1123.39	0.548201	33.1253	0
	High	QTIDNSQGAYQEAFDISK	1	1	1	P27348		0	1.52416e+07	0	0.0001714		28.77	0.0141368	2	2014.94	1.35219	39.0304	0
	High	YLAEVAcGDDR	2	1	1	P27348	C7(Methylthio)	0	4.20971e+06	0	0.000172		24.84	0.010499	2	1257.52	-0.129668	34.9335	0
	High	NLLSVAYK	4	7	7	P31946;P62258;Q04917;P61981;P31947;P27348;P63104		0	1.14469e+08	0.001	0.01476		25.97	0.0136582	2	907.525	0.331355	35.7891	0
	High	VISSIEQK	3	4	5	P31946;Q04917;P61981;P27348;P31947		0	4.314e+07	0.001	0.01517		14.89	0.431372	2	903.514	-0.24398	19.089	0
P30101	Protein disulfide-isomerase A3 OS=Homo sapiens OX=9606 GN=PDIA3 PE=1 SV=4 - [PDIA3_HUMAN]	398.398	42.97	1	17	17	28	4.28784e+07	505	56.7468	6.354	0.00314359
	A3	Sequence	# PSMs	# Proteins	# Protein Groups	Protein Group Accessions	Modifications	ΔCn	Area	q-Value	PEP		IonScore	Exp Value	Charge	MH+ [Da]	ΔM [ppm]	RT [min]	# Missed Cleavages
	High	VVVAENFDEIVNNENK	2	1	1	P30101		0	2.39163e+07	0	2.624e-08		76.66	2.97769e-07	2	1832.9	-1.89637	42.1638	0
	High	LNFAVASR	2	1	1	P30101		0	5.61632e+06	0	2.242e-05		60.86	9.1059e-06	2	877.489	-0.150543	29.4961	0
	High	DGEEAGAYDGPR	2	1	1	P30101		0	1.22401e+07	0	8.075e-06		41.3	0.000163088	2	1236.51	0.939993	21.1208	0
	High	FLQDYFDGNLK	2	1	1	P30101		0	9698761	0	7.727e-05		39.1	0.00142096	2	1359.66	-1.1559	46.8016	0
	High	ELSDFISYLQR	2	1	1	P30101		0	7.00329e+06	0	1.265e-05		38.43	0.00185178	2	1370.69	-1.14705	54.3076	0
	High	QAGPASVPLR	2	1	1	P30101		0	1.46928e+07	0	0.001243		36.4	0.0011798	2	995.562	-0.828412	23.0669	0
	High	YGVSGYPTLK	2	1	1	P30101		0	9.31012e+06	0	0.0007416		35.36	0.00289616	2	1084.57	-0.273934	32.4902	0
	High	VDcTANTNTcNK	2	1	1	P30101	C3(Methylthio); C10(Methylthio)	0	1.21337e+07	0	0.000355		35.29	0.000295101	2	1375.51	-1.00633	24.9925	0
	High	GFPTIYFSPANK	2	1	1	P30101		0	9.23282e+06	0	5.35e-05		35.25	0.00376158	2	1341.69	1.78397	47.187	0
	High	FVMQEEFSR	2	1	1	P30101		0	1.3503e+07	0	0.0002723		30.34	0.00614924	2	1172.54	-0.483317	35.6725	0
	High	MDATANDVPSPYEVR	1	1	1	P30101		0	2.20675e+07	0	0.0003179		27.71	0.0136394	2	1664.76	0.324072	32.8951	0
	High	TFSHELSDFGLESTAGEIPVVAIR	1	1	1	P30101		0	1.22934e+07	0	5.477e-05		22.16	0.111897	3	2575.3	-0.684226	55.4495	0
	High	DASIVGFFDDSFSEAHSEFLK	2	1	1	P30101		0	3.17644e+06	0	0.002405		14.36	0.39392	3	2348.07	0.221251	60.475	0
	High	LAPEYEAAATR	1	1	1	P30101		0	18724282	0.002	0.0222		19.66	0.153564	2	1191.6	0.742411	23.945	0
	High	SEPIPESNDGPVK	1	1	1	P30101		0	2.87786e+07	0.003	0.04894		18.29	0.162336	2	1368.66	-1.06233	23	0
	High	EATNPPVIQEEKPK	1	1	1	P30101		0	1.56399e+07	0.004	0.05747		13.72	0.585975	2	1579.83	0.0759388	20.8079	0
	High	DPNIVIAK	1	1	1	P30101		0	7.59403e+07	0.007	0.1175		14.52	0.104189	2	869.51	1.05354	25.2674	0
O00299	Chloride intracellular channel protein 1 OS=Homo sapiens OX=9606 GN=CLIC1 PE=1 SV=4 - [CLIC1_HUMAN]	395.763	47.72	1	8	8	20	4.47592e+07	241	26.9057	5.17334	0.00224542
	A3	Sequence	# PSMs	# Proteins	# Protein Groups	Protein Group Accessions	Modifications	ΔCn	Area	q-Value	PEP		IonScore	Exp Value	Charge	MH+ [Da]	ΔM [ppm]	RT [min]	# Missed Cleavages
	High	LAALNPESNTAGLDIFAK	2	1	1	O00299		0	5.46491e+07	0	1.44e-08		92.53	8.76798e-09	2	1844.97	-0.83948	51.1073	0
	High	GVTFNVTTVDTK	2	1	1	O00299		0	9.03529e+06	0	3.896e-08		83.19	5.61288e-08	2	1281.67	-1.85384	34.2926	0
	High	EEFASTcPDDEEIELAYEQVAK	3	1	1	O00299	C7(Methylthio)	0	1.99012e+07	0	5.408e-09		57.35	7.17901e-06	2	2562.09	-0.591625	55.3844	0
	High	FLDGNELTLADcNLLPK	3	1	1	O00299	C12(Methylthio)	0	2.61357e+07	0	7.608e-07		47.81	0.000245882	2	1921.94	0.685457	59.635	0
	High	NSNPALNDNLEK	2	1	1	O00299		0	5.34926e+07	0	0.0001116		29.71	0.0119734	2	1328.64	-0.221935	22.5612	0
	High	IEEFLEAVLcPPR	4	1	1	O00299	C10(Methylthio)	0	3.88095e+06	0	6.181e-05		28.62	0.0189618	2	1561.77	-1.60558	60.3597	0
	High	aEEQPQVELFVK	2	1	1	O00299	N-Term(Acetyl)	0	1.58426e+07	0	0.003633		18.31	0.210288	2	1458.74	-2.55993	47.3953	0
	High	GFTIPEAFR	2	1	1	O00299		0	1.21609e+07	0.003	0.04395		23.62	0.0454063	2	1037.54	-0.196557	46.9522	0
P06899	Histone H2B type 1-J OS=Homo sapiens OX=9606 GN=H2BC11 PE=1 SV=3 - [H2B1J_HUMAN]	395.46	35.71	5	2	5	14	1.40909e+08	126	13.8956	10.3159	0.0015718
	A3	Sequence	# PSMs	# Proteins	# Protein Groups	Protein Group Accessions	Modifications	ΔCn	Area	q-Value	PEP		IonScore	Exp Value	Charge	MH+ [Da]	ΔM [ppm]	RT [min]	# Missed Cleavages
	High	AmGIMNSFVNDIFER	4	14	2	P06899;O60814	M2(Oxidation)	0	1.69633e+07	0	1.862e-08		82.44	5.58761e-08	2	1759.82	0.526672	58.8606	0
	High	AMGIMNSFVNDIFER	4	14	2	P06899;O60814		0	1.2026e+08	0	1.155e-08		81.24	8.3806e-08	2	1743.82	-0.284459	60.8704	0
	High	LLLPGELAK	1	14	2	P06899;O60814		0	1.85529e+08	0	0.002121		29.81	0.00255956	2	953.605	1.88093	39.045	0
	High	QVHPDTGISSK	1	14	2	P06899;O60814		0	1.16938e+08	0.001	0.01226		33.58	0.00535007	2	1168.6	-0.0792803	16.5118	0
	High	KESYSIYVYK	2	5	1	P06899		0	8.07601e+06	0.001	0.006094		20.71	0.118461	2	1279.66	-0.368561	31.2221	1
	High	ESYSIYVYK	2	5	1	P06899		0	2.29865e+07	0.001	0.01611		15.59	0.311945	2	1151.56	-1.2582	36.0771	0
P45880	Voltage-dependent anion-selective channel protein 2 OS=Homo sapiens OX=9606 GN=VDAC2 PE=1 SV=2 - [VDAC2_HUMAN]	393.71	51.36	1	9	9	17	2.0231e+07	294	31.5465	7.56201	0.00190861
	A3	Sequence	# PSMs	# Proteins	# Protein Groups	Protein Group Accessions	Modifications	ΔCn	Area	q-Value	PEP		IonScore	Exp Value	Charge	MH+ [Da]	ΔM [ppm]	RT [min]	# Missed Cleavages
	High	WNTDNTLGTEIAIEDQIcQGLK	3	1	1	P45880	C18(Methylthio)	0	3.71346e+06	0	1.537e-09		72.55	6.55967e-07	2	2508.17	-0.585684	61.6048	0
	High	LTLSALVDGK	2	1	1	P45880		0	9.30971e+06	0	1.451e-05		58.88	1.08065e-05	2	1016.6	0.289482	42.9341	0
	High	ScSGVEFSTSGSSNTDTGK	2	1	1	P45880	C2(Methylthio)	0	1.53625e+07	0	2.271e-08		54.53	4.93319e-06	2	1896.76	-0.235133	29.2391	0
	High	WcEYGLTFTEK	2	1	1	P45880	C2(Methylthio)	0	6.19966e+06	0	4.808e-06		53.28	1.62113e-05	2	1422.61	-0.531138	51.3055	0
	High	VcEDLDTSVNLAWTSGTNcTR	1	1	1	P45880	C2(Methylthio); C19(Methylthio)	0	1.74273e+06	0	5.673e-08		42.76	0.00020392	2	2376.99	0.0648806	54.2427	0
	High	YQLDPTASISAK	2	1	1	P45880		0	2.1951e+07	0	9.488e-06		37.01	0.00314526	2	1293.67	-1.07403	32.1159	0
	High	TGDFQLHTNVNDGTEFGGSIYQK	2	1	1	P45880		0	1.71811e+07	0	9.256e-07		29.95	0.0116837	3	2528.17	0.485661	40.6442	0
	High	VNNSSLIGVGYTQTLRPGVK	2	1	1	P45880		0	1.95691e+07	0	1.377e-05		27.2	0.0197215	2	2103.15	-1.138	38.8573	0
	High	LTFDTTFSPNTGK	1	1	1	P45880		0	1.91727e+07	0	0.0006108		23.68	0.0505687	2	1428.7	-0.841941	39.613	0
P00338	L-lactate dehydrogenase A chain OS=Homo sapiens OX=9606 GN=LDHA PE=1 SV=2 - [LDHA_HUMAN]	393.178	39.46	1	10	11	25	6.1681e+07	332	36.6654	8.26514	0.00280678
	A3	Sequence	# PSMs	# Proteins	# Protein Groups	Protein Group Accessions	Modifications	ΔCn	Area	q-Value	PEP		IonScore	Exp Value	Charge	MH+ [Da]	ΔM [ppm]	RT [min]	# Missed Cleavages
	High	DLADELALVDVIEDK	3	1	1	P00338		0	2.39794e+07	0	1.677e-07		64.64	5.2049e-06	2	1657.85	-0.720806	59.5685	0
	High	GEMMDLQHGSLFLR	4	1	1	P00338		0	2.13881e+07	0	1.277e-07		52.49	6.65092e-05	2	1633.78	-0.573816	46.2719	0
	High	SADTLWGIQK	2	1	1	P00338		0	2.93631e+07	0	7.468e-05		49.84	0.000141104	2	1118.58	-0.0619768	37.1134	0
	High	VIGSGcNLDSAR	4	2	2	P00338;P07195	C6(Methylthio)	0	8.49487e+07	0	1.634e-05		46.23	0.000197733	2	1237.57	0.313324	32.2814	0
	High	LVIITAGAR	2	1	1	P00338		0	1.07914e+07	0	4.434e-05		40.2	0.000291273	2	913.582	-0.78739	30.1724	0
	High	DQLIYNLLK	2	1	1	P00338		0	1.98168e+07	0	0.0002114		38.71	0.00102285	2	1119.64	-0.613574	50.8498	0
	High	VTLTSEEEAR	2	1	1	P00338		0	5.74847e+07	0	1.19e-05		34.99	0.00486529	2	1134.56	0.651725	21.3314	0
	High	DDVFLSVPcILGQNGISDLVK	1	1	1	P00338	C9(Methylthio)	0	1.35391e+06	0	2.62e-06		26.53	0.0384633	3	2278.15	-0.0154333	64.3172	0
	High	QVVESAYEVIK	2	1	1	P00338		0	4.26097e+07	0	0.00292		21.04	0.0991678	2	1264.68	-0.288758	33.9397	0
	High	TLHPDLGTDKDK	2	1	1	P00338		0	7.23953e+06	0	0.0009703		19.2	0.150884	3	1339.69	0.542645	18.4905	1
	High	FIIPNVVK	1	1	1	P00338		0	9.84043e+06	0.006	0.09202		21.27	0.0462798	2	929.582	0.377217	43.6205	0
Q92598	Heat shock protein 105 kDa OS=Homo sapiens OX=9606 GN=HSPH1 PE=1 SV=1 - [HS105_HUMAN]	385.606	25.76	1	16	16	26	6.94321e+06	858	96.8037	5.38916	0.00291905
	A3	Sequence	# PSMs	# Proteins	# Protein Groups	Protein Group Accessions	Modifications	ΔCn	Area	q-Value	PEP		IonScore	Exp Value	Charge	MH+ [Da]	ΔM [ppm]	RT [min]	# Missed Cleavages
	High	SVNEVMEWMNNVMNAQAK	1	1	1	Q92598		0	1.69648e+06	0	4.621e-08		68.31	1.18057e-06	2	2094.94	0.028701	60.6977	0
	High	NQQITHANNTVSNFK	1	1	1	Q92598		0	4371507	0	9.493e-08		63.73	5.25317e-06	2	1715.85	-0.371122	21.7956	0
	High	SQFEELcAELLQK	3	1	1	Q92598	C7(Methylthio)	0	2.13516e+06	0	3.475e-08		58.56	1.44888e-05	2	1583.74	-0.0959788	61.6745	0
	High	VEDVSAVEIVGGATR	2	1	1	Q92598		0	5.81002e+06	0	1.457e-07		56.48	3.22739e-05	2	1501.79	-0.201967	37.2894	0
	High	DLLNMYIETEGK	1	1	1	Q92598		0	2.90075e+06	0	9.155e-06		44.32	0.00045304	2	1425.69	-0.107041	50.3467	0
	High	LMNDMTAVALNYGIYK	1	1	1	Q92598		0	3.79007e+06	0	4.477e-07		39.49	0.00165879	2	1816.9	-0.546793	52.2808	0
	High	FQEAEERPK	2	1	1	Q92598		0	5.56231e+06	0	0.0003305		37.7	0.00196996	2	1133.56	-0.197689	16.8358	0
	High	VLGTAFDPFLGGK	2	1	1	Q92598		0	5.90028e+06	0	0.0001573		34.65	0.00411321	2	1321.72	-0.0967538	52.4593	0
	High	NAVEEYVYEFR	2	1	1	Q92598		0	3.69443e+06	0	0.0003022		32.46	0.00465387	2	1418.66	-0.410703	48.6404	0
	High	LMSSNSTDLPLNIEcFMNDK	2	1	1	Q92598	C15(Methylthio)	0	1.76075e+06	0	1.311e-05		28.24	0.0103478	2	2318.02	-0.576165	58.9231	0
	High	VVNVELPIEANLVWQLGK	1	1	1	Q92598		0	1.1385e+06	0	3.403e-05		22.15	0.040839	2	2021.14	-0.411543	60.5623	0
	High	FVVQNVSAQK	1	1	1	Q92598		0	8.3822e+06	0	0.002862		20.83	0.134231	2	1119.62	0.252851	24.2966	0
	High	LLTETEDWLYEEGEDQAK	2	1	1	Q92598		0	6.54716e+06	0	0.0001206		19.85	0.0957507	2	2168.99	-0.329913	49.1376	0
	High	SVLDAAQIVGLNcLR	2	1	1	Q92598	C13(Methylthio)	0	1.62127e+06	0	0.0002712		19.65	0.17126	2	1617.85	0.420617	59.1621	0
	High	YNHIDESEMK	2	1	1	Q92598		0	3.29229e+06	0.001	0.006536		19.93	0.0376012	2	1265.55	-0.805506	19.8785	0
	High	MFEELGQR	1	1	1	Q92598		0	2.05869e+06	0.007	0.1229		14.91	0.306707	2	1009.48	0.200357	29.9113	0
Q15084	Protein disulfide-isomerase A6 OS=Homo sapiens OX=9606 GN=PDIA6 PE=1 SV=1 - [PDIA6_HUMAN]	380.487	29.09	1	8	8	15	1.65057e+07	440	48.0913	5.08447	0.00168407
	A3	Sequence	# PSMs	# Proteins	# Protein Groups	Protein Group Accessions	Modifications	ΔCn	Area	q-Value	PEP		IonScore	Exp Value	Charge	MH+ [Da]	ΔM [ppm]	RT [min]	# Missed Cleavages
	High	TGEAIVDAALSALR	2	1	1	Q15084		0	1.24153e+07	0	5.492e-08		89.74	1.6297e-08	2	1386.76	-0.326603	56.6642	0
	High	DGELPVEDDIDLSDVELDDLGKDEL	3	1	1	Q15084		0	3.63196e+06	0	2.075e-07		82.29	5.69544e-08	2	2758.26	-2.54563	58.8581	1
	High	LAAVDATVNQVLASR	2	1	1	Q15084		0	1.4589e+07	0	1.204e-08		77.73	2.27685e-07	2	1527.85	0.342706	45.8681	0
	High	GSTAPVGGGAFPTIVER	2	1	1	Q15084		0	2.25128e+07	0	1.307e-05		31.77	0.0106444	2	1615.84	-0.164479	39.8935	0
	High	ALDLFSDNAPPPELLEIINEDIAK	2	1	1	Q15084		0	2.30345e+06	0	1.759e-08		23.99	0.0652406	2	2637.37	-0.338773	64.2523	0
	High	GESPVDYDGGR	1	1	1	Q15084		0	1.10388e+07	0	0.0004743		23.65	0.0174765	2	1151.5	0.189605	21.7838	0
	High	NSYLEVLLK	2	1	1	Q15084		0	4.2656e+06	0	0.0001797		20.89	0.0570293	2	1078.61	-0.0147307	50.4545	0
	High	KDVIELTDDSFDK	1	1	1	Q15084		0	1.82976e+06	0	0.001135		15.01	0.411728	2	1524.74	0.303285	36.3773	1
Q04917	14-3-3 protein eta OS=Homo sapiens OX=9606 GN=YWHAH PE=1 SV=4 - [1433F_HUMAN]	378.429	43.09	1	6	9	24	1.10646e+08	246	28.201	4.84326	0.00269451
	A3	Sequence	# PSMs	# Proteins	# Protein Groups	Protein Group Accessions	Modifications	ΔCn	Area	q-Value	PEP		IonScore	Exp Value	Charge	MH+ [Da]	ΔM [ppm]	RT [min]	# Missed Cleavages
	High	ELETVcNDVLSLLDK	2	1	1	Q04917	C6(Methylthio)	0	2.5321e+06	0	2.22e-10		90.44	1.31029e-08	2	1736.84	-0.311232	65.5925	0
	High	QAFDDAIAELDTLNEDSYK	2	1	1	Q04917		0	4.21097e+06	0	8.966e-09		59.43	1.27708e-05	2	2157.98	-1.07194	55.1122	0
	High	DSTLIMQLLR	4	7	7	P31946;P62258;Q04917;P61981;P31947;P27348;P63104		0	1.74328e+08	0	2.204e-06		55.97	3.30073e-05	2	1189.66	-0.0378506	56.6624	0
	High	DSTLImQLLR	2	7	7	P31946;P62258;Q04917;P61981;P31947;P27348;P63104	M6(Oxidation)	0	3.09617e+06	0	2.822e-06		54.78	5.18949e-05	2	1205.65	-1.99586	53.4269	0
[truncated: 4,866 more rows]

## Sheet: HepG2+PA+Tunicamycin 5 ugml
Accession	Description	Score	Coverage	# Proteins	# Unique Peptides	# Peptides	# PSMs	Area	# AAs	MW [kDa]	calc. pI	Relative abundance (%)
P02787	Serotransferrin OS=Homo sapiens OX=9606 GN=TF PE=1 SV=3 - [TRFE_HUMAN]	3343.18	56.16	1	34	34	203	4.36543e+08	698	77.0136	7.12256	0.265359
	A3	Sequence	# PSMs	# Proteins	# Protein Groups	Protein Group Accessions	Modifications	ΔCn	Area	q-Value	PEP		Exp Value	Charge	MH+ [Da]	ΔM [ppm]	RT [min]	# Missed Cleavages
	High	LcMGSGLNLcEPNNK	7	1	1	P02787	C2(Methylthio); C10(Methylthio)	0	2.37889e+08	0	0.0005692		1.10169e-08	2	1684.7	0.180903	51.6447	0
	High	EDLIWELLNQAQEHFGK	3	1	1	P02787		0	2.78786e+07	0	0.001004		1.80676e-07	2	2070.03	0.319539	66.6292	0
	High	DGAGDVAFVK	2	1	1	P02787		0	2.09494e+08	0	0.002492		1.90204e-07	2	978.491	1.84167	27.4178	0
	High	NLNEKDYELLcLDGTR	2	1	1	P02787	C11(Methylthio)	0	1.48261e+06	0	0.008409		1.1574e-06	2	1941.9	-0.54705	62.9776	1
	High	IMNGEADAmSLDGGFVYIAGK	5	1	1	P02787	M9(Oxidation)	0	5.34826e+06	0	0.001743		4.67113e-06	2	2175	-3.02293	48.2461	0
	High	DYELLcLDGTR	8	1	1	P02787	C6(Methylthio)	0	1.17151e+08	0	0.005989		2.22924e-06	2	1343.6	0.575782	52.3872	0
	High	TAGWNIPMGLLYNK	8	1	1	P02787		0	1.91125e+08	0	0.005091		8.11963e-06	2	1577.81	-0.94778	63.0518	0
	High	IEcVSAETTEDcIAK	19	1	1	P02787	C3(Methylthio); C12(Methylthio)	0	4.84808e+08	0	0.008181		3.10127e-06	2	1703.7	-0.466768	43.1214	0
	High	DQYELLcLDNTR	3	1	1	P02787	C7(Methylthio)	0	3.96658e+07	0	0.03164		7.25098e-06	2	1528.68	1.01013	59.1957	0
	High	ImNGEADAmSLDGGFVYIAGK	2	1	1	P02787	M2(Oxidation); M9(Oxidation)	0	3.57717e+06	0	0.001528		1.66562e-05	2	2191.01	0.657148	45.6516	0
	High	KDSGFQMNQLR	2	1	1	P02787		0	5.32198e+06	0	0.02996		1.88483e-05	2	1323.65	0.86569	28.0645	1
	High	cSTSSLLEAcTFR	3	1	1	P02787	C1(Methylthio); C10(Methylthio)	0	6.88091e+07	0	0.01796		7.27983e-06	2	1509.62	0.416031	64.9757	0
	High	IMNGEADAMSLDGGFVYIAGK	9	1	1	P02787		0	9.95073e+07	0	0.001658		3.12538e-05	2	2159.01	-1.44277	52.8645	0
	High	DSGFQmNQLR	3	1	1	P02787	M6(Oxidation)	0	9.34445e+06	0	0.02392		1.75418e-05	2	1211.55	-0.399243	22.6541	0
	High	APNHAVVTR	6	1	1	P02787		0	1.32923e+07	0	0.02385		2.4017e-05	2	964.532	-0.0592399	14.5145	0
	High	EFQLFSSPHGK	4	1	1	P02787		0	4.10625e+06	0	0.03612		7.79669e-05	2	1276.63	-1.42146	61.1355	0
	High	DcHLAQVPSHTVVAR	24	1	1	P02787	C2(Methylthio)	0	2.4461e+07	0	0.008008		0.000103738	2	1678.81	-0.168747	60.4642	0
	High	WcAVSEHEATK	12	1	1	P02787	C2(Methylthio)	0	6.68329e+07	0	0.01736		2.04289e-05	2	1306.56	-0.228785	26.7909	0
	High	SASDLTWDNLK	2	1	1	P02787		0	2.23268e+08	0	0.04673		8.53812e-05	2	1249.61	1.01154	38.0128	0
	High	WcALSHHER	2	1	1	P02787	C2(Methylthio)	0	1.33745e+07	0	0.02394		3.00235e-05	2	1184.51	-0.202429	65.2738	0
	High	DSGFQMNQLR	2	1	1	P02787		0	1.27055e+08	0	0.01603		8.11483e-05	2	1195.55	0.54944	32.3706	0
	High	SAGWNIPIGLLYcDLPEPR	2	1	1	P02787	C13(Methylthio)	0	16419579	0	0.01451		0.000170651	2	2160.05	-3.69609	66.345	0
	High	ASYLDcIR	9	1	1	P02787	C6(Methylthio)	0	113807532	0	0.0476		4.62445e-05	2	986.445	1.89241	44.3037	0
	High	HQTVPQNTGGK	7	1	1	P02787		0	2.62142e+07	0	0.008684		0.000169968	2	1166.59	0.0470538	14.2985	0
	High	SVIPSDGPSVAcVK	3	1	1	P02787	C12(Methylthio)	0	3.63217e+08	0	0.03526		0.000262351	2	1404.68	-1.22907	37.865	0
	High	EGYYGYTGAFR	6	1	1	P02787		0	2.28281e+08	0	0.03204		0.000187848	2	1283.57	0.18093	38.0089	0
	High	MYLGYEYVTAIR	4	1	1	P02787		0	1.20199e+08	0	0.01057		0.000659681	2	1478.73	-0.620113	60.7121	0
	High	EDPQTFYYAVAVVK	3	1	1	P02787		0	4.61605e+08	0	0.014		0.00069275	2	1629.82	-0.0661442	58.831	0
	High	EGTcPEAPTDEcKPVK	7	1	1	P02787	C4(Methylthio); C12(Methylthio)	0	2.7091e+08	0	0.03604		0.000199557	2	1795.74	-0.570121	31.7465	0
	High	KPVEEYANcHLAR	6	1	1	P02787	C9(Methylthio)	0	6.26586e+07	0	0.01329		0.00181203	2	1575.74	-1.66118	61.5063	0
	High	LcmGSGLNLcEPNNK	3	1	1	P02787	C2(Methylthio); M3(Oxidation); C10(Methylthio)	0	33319806	0	0.02293		0.000661422	2	1700.69	0.22631	46.5045	0
	High	mYLGYEYVTAIR	4	1	1	P02787	M1(Oxidation)	0	4.59314e+07	0	0.06393		0.00415076	2	1494.73	0.0117927	45.5722	0
	High	SDNcEDTPEAGYFAIAVVK	2	1	1	P02787	C4(Methylthio)	0	1.05338e+07	0	0.06394		0.00680415	2	2074.91	-1.29272	52.0767	0
	High	TAGWNIPmGLLYNK	5	1	1	P02787	M8(Oxidation)	0	4.15328e+06	0	0.06543		0.0216864	2	1593.81	-1.27095	59.9635	0
	High	ADRDQYELLcLDNTR	2	1	1	P02787	C10(Methylthio)	0	1.85529e+06	0	0.02756		0.0173901	2	1870.84	-0.299275	61.2773	1
	High	HSTIFENLANK	6	1	1	P02787		0	1.03416e+07	0	0.03645		0.0457309	2	1273.65	-0.638903	31.4093	0
	High	DDTVcLAK	1	1	1	P02787	C5(Methylthio)	0	8.70242e+07	0.003	0.1484		0.000574246	2	910.403	2.02686	26.1729	0
	High	ScHTAVGR	2	1	1	P02787	C2(Methylthio)	0	1.36751e+07	0.003	0.1507		0.00087945	2	876.382	0.156434	18.883	0
	High	DSAHGFLK	2	1	1	P02787		0	1.20708e+08	0.004	0.1773		0.00246845	2	874.445	3.53426	21.0051	0
	High	KPVDEYK	1	1	1	P02787		0	3.48599e+06	0.006	0.2253		0.0363106	2	878.462	0.137014	15.2555	0
P02768	Serum albumin OS=Homo sapiens OX=9606 GN=ALB PE=1 SV=2 - [ALBU_HUMAN]	2725.12	7.06	1	5	5	161	4.12948e+09	609	69.3215	6.27783	0.210458
	A3	Sequence	# PSMs	# Proteins	# Protein Groups	Protein Group Accessions	Modifications	ΔCn	Area	q-Value	PEP		Exp Value	Charge	MH+ [Da]	ΔM [ppm]	RT [min]	# Missed Cleavages
	High	KVPQVSTPTLVEVSR	48	1	1	P02768		0	4.00888e+09	0	0.005085		2.4698e-06	2	1639.94	1.24738	34.1963	1
	High	VPQVSTPTLVEVSR	26	1	1	P02768		0	4.46623e+09	0	0.006064		1.23793e-05	2	1511.84	-0.908189	37.4112	0
	High	ccTESLVNR	70	1	1	P02768	C1(Methylthio); C2(Methylthio)	0	3.91332e+09	0	0.008695		2.39579e-06	2	1116.43	1.16173	34.1984	0
	High	YLYEIAR	10	1	1	P02768		0	1.76548e+09	0	0.06443		0.00249738	2	927.493	-0.466574	33.3805	0
	High	CcTESLVNR	2	1	1	P02768	C2(Methylthio)	0	4.52549e+06	0.001	0.08389		0.135189	2	1070.44	-0.109999	27.2064	0
	High	YIcENQDSISSK	5	1	1	P02768	C3(Methylthio)	0	229837	0.003	0.1573		0.00592987	2	1432.61	0.420225	33.6375	0
P11021	Endoplasmic reticulum chaperone BiP OS=Homo sapiens OX=9606 GN=HSPA5 PE=1 SV=2 - [BIP_HUMAN]	715.253	36.39	1	15	17	48	3.95231e+07	654	72.2884	5.16064	0.0627451
	A3	Sequence	# PSMs	# Proteins	# Protein Groups	Protein Group Accessions	Modifications	ΔCn	Area	q-Value	PEP		Exp Value	Charge	MH+ [Da]	ΔM [ppm]	RT [min]	# Missed Cleavages
	High	SQIFSTASDNQPTVTIK	2	1	1	P11021		0	4.06804e+07	0	0.001741		1.72318e-06	2	1836.93	-1.17755	35.9963	0
	High	TFAPEEISAMVLTK	5	1	1	P11021		0	1.2653e+07	0	0.004016		8.43069e-06	2	1536.8	0.799431	53.0736	0
	High	IINEPTAAAIAYGLDK	6	2	2	P11021;P11142		0	4.03849e+07	0	0.007844		8.80321e-06	2	1659.9	1.26223	45.2749	0
	High	NQLTSNPENTVFDAK	2	1	1	P11021		0	3.75039e+07	0	0.01408		0.000443485	2	1677.81	0.138137	33.3947	0
	High	VEIIANDQGNR	5	2	2	P11021;P11142		0	1.82662e+07	0	0.02415		0.000422833	2	1228.63	2.38293	21.5369	0
	High	LSSEDKETMEK	1	1	1	P11021		0	4.42917e+06	0	0.02542		0.000318774	2	1296.6	-0.124085	15.6755	1
	High	FEELNMDLFR	3	1	1	P11021		0	5.70181e+06	0	0.0238		0.000426406	2	1313.62	0.396931	53.1969	0
	High	DAGTIAGLNVMR	2	1	1	P11021		0	0	0	0.04374		0.00143579	2	1217.64	9.14226	38.937	0
	High	DNHLLGTFDLTGIPPAPR	4	1	1	P11021		0	2.41803e+06	0	0.007887		0.00195074	2	1934.01	-1.2107	62.9863	0
	High	LYGSAGPPPTGEEDTAEKDEL	4	1	1	P11021		0	2.37213e+07	0	0.02744		0.00106204	2	2175.99	0.582228	33.588	1
	High	IEWLESHQDADIEDFK	3	1	1	P11021		0	1.43274e+07	0	0.01204		0.00116146	2	1974.91	-1.19705	45.5312	0
	High	ITPSYVAFTPEGER	1	1	1	P11021		0	2.37162e+07	0	0.05635		0.0108961	2	1566.78	-2.15375	39.0237	0
	High	VYEGERPLTK	2	1	1	P11021		0	1.19654e+07	0	0.06538		0.0196873	2	1191.64	0.0227578	19.1822	0
	High	IEIESFYEGEDFSETLTR	2	1	1	P11021		0	1.36301e+07	0	0.06583		0.0601705	2	2164.99	-1.21097	53.4436	0
	High	ITITNDQNR	2	1	1	P11021		0	2.04895e+07	0.001	0.09021		0.0574558	2	1074.55	-0.427131	19.0249	0
	High	ETAEAYLGK	1	1	1	P11021		0	5.95646e+06	0.003	0.1032		4.83975e-05	2	981.489	0.212876	23.8011	0
	High	VTHAVVTVPAYFNDAQR	1	1	1	P11021		0	0	0.003	0.1227		0.103927	2	1887.98	2.64971	38.9729	0
	High	LSSEDKETmEK	2	1	1	P11021	M9(Oxidation)	0	1.04735e+06	0.006	0.2245		0.0415229	2	1312.59	-0.340534	15.7671	1
P10809	60 kDa heat shock protein, mitochondrial OS=Homo sapiens OX=9606 GN=HSPD1 PE=1 SV=2 - [CH60_HUMAN]	596.339	37	1	14	14	28	7.82904e+06	573	61.0164	5.87158	0.0366013
	A3	Sequence	# PSMs	# Proteins	# Protein Groups	Protein Group Accessions	Modifications	ΔCn	Area	q-Value	PEP		Exp Value	Charge	MH+ [Da]	ΔM [ppm]	RT [min]	# Missed Cleavages
	High	VTDALNATR	2	1	1	P10809		0	9.52469e+06	0	0.004172		9.91523e-07	2	960.511	0.170391	19.3397	0
	High	LVQDVANNTNEEAGDGTTTATVLAR	2	1	1	P10809		0	2.83484e+06	0	0.006548		1.78862e-05	2	2560.26	2.64325	32.3987	0
	High	VGEVIVTK	2	1	1	P10809		0	3.71001e+06	0	0.05222		2.54913e-05	2	844.516	2.90425	21.007	0
	High	IMQSSSEVGYDAMAGDFVNMVEK	3	1	1	P10809		0	4.64515e+06	0	0.004628		5.78501e-05	2	2508.11	-0.0330296	55.9793	0
	High	cEFQDAYVLLSEK	2	1	1	P10809	C1(Methylthio)	0	5.00009e+06	0	0.008943		0.000193106	2	1590.72	0.179131	53.974	0
	High	IQEIIEQLDVTTSEYEK	3	1	1	P10809		0	3.2341e+06	0	0.01232		0.000379605	2	2038.02	-0.229097	49.6297	0
	High	LSDGVAVLK	2	1	1	P10809		0	3.76943e+06	0	0.05572		0.000243147	2	901.537	1.31478	27.8365	0
	High	VGLQVVAVK	2	1	1	P10809		0	2.41215e+06	0	0.02125		8.0805e-05	2	912.589	0.962439	30.8118	0
	High	ALMLQGVDLLADAVAVTMGPK	1	1	1	P10809		0	869953	0	0.009527		0.000646608	2	2113.14	-0.811233	67.7054	0
	High	TVIIEQSWGSPK	2	1	1	P10809		0	5.57175e+06	0	0.0314		0.002322	2	1344.71	-2.98332	36.4869	0
	High	TALLDAAGVASLLTTAEVVVTEIPK	3	1	1	P10809		0	686871	0	0.02628		0.00229968	2	2482.4	0.0312709	68.8318	0
	High	TLNDELEIIEGMK	2	1	1	P10809		0	0	0	0.02877		0.0129637	2	1504.75	-1.55865	52.53	0
	High	cIPALDSLTPANEDQK	1	1	1	P10809	C1(Methylthio)	0	8.39067e+06	0.003	0.104		0.019646	2	1760.82	0.73489	43.684	0
	High	NAGVEGSLIVEK	1	1	1	P10809		0	3.69753e+06	0.004	0.1792		0.607852	2	1215.66	0.0965349	29.6047	0
P14625	Endoplasmin OS=Homo sapiens OX=9606 GN=HSP90B1 PE=1 SV=1 - [ENPL_HUMAN]	438	23.04	1	13	14	22	9.82053e+06	803	92.4113	4.84326	0.0287582
	A3	Sequence	# PSMs	# Proteins	# Protein Groups	Protein Group Accessions	Modifications	ΔCn	Area	q-Value	PEP		Exp Value	Charge	MH+ [Da]	ΔM [ppm]	RT [min]	# Missed Cleavages
	High	EESDDEAAVEEEEEEK	2	1	1	P14625		0	742116	0	0.0005384		3.47802e-08	2	1866.72	-0.208101	22.8164	0
	High	ELISNASDALDK	2	2	2	P14625;P08238		0	1.13943e+07	0	0.02489		0.000376415	2	1275.64	-0.194135	29.8047	0
	High	GVVDSDDLPLNVSR	2	1	1	P14625		0	6.62337e+06	0	0.0083		0.000647691	2	1485.75	0.000558639	37.8689	0
	High	LTESPcALVASQYGWSGNMER	2	1	1	P14625	C6(Methylthio)	0	1.01778e+06	0	0.007681		0.000428365	2	2345.03	-0.861034	57.0671	0
	High	SGYLLPDTK	2	1	1	P14625		0	2.24401e+06	0	0.04527		0.00113297	2	993.527	1.49732	29.9864	0
	High	LISLTDENALSGNEELTVK	2	1	1	P14625		0	1.12075e+07	0	0.008437		0.00219784	2	2046.06	-0.40445	45.4004	0
	High	DISTNYYASQK	2	1	1	P14625		0	6.85974e+06	0	0.01765		0.00112143	2	1289.6	1.25875	25.3802	0
	High	FAFQAEVNR	2	1	1	P14625		0	2.31448e+06	0.001	0.07555		0.000992302	2	1081.54	1.54016	33.4101	0
	High	EFEPLLNWMK	1	1	1	P14625		0	625449	0.001	0.08964		0.00980791	2	1306.65	-2.16348	65.1319	0
	High	SGTSEFLNK	1	1	1	P14625		0	2.6685e+06	0.001	0.09201		0.0288624	2	982.484	0.325973	23.3381	0
	High	EEEAIQLDGLNASQIR	1	1	1	P14625		0	0	0.001	0.07298		0.221904	2	1785.9	0.0299273	40.046	0
	High	TETVEEPMEEEEAAKEEK	1	1	1	P14625		0	1.01513e+06	0.008	0.2456		0.0261275	2	2107.93	1.94028	25.5496	1
	High	SILFVPTSAPR	1	1	1	P14625		0	3.17852e+06	0.008	0.2348		0.0506662	2	1187.68	-0.676503	41.8855	0
	High	LGVIEDHSNR	1	1	1	P14625		0	2.31535e+06	0.008	0.2414		0.320076	2	1139.58	1.03482	19.4271	0
P60709	Actin, cytoplasmic 1 OS=Homo sapiens OX=9606 GN=ACTB PE=1 SV=1 - [ACTB_HUMAN]	397.552	42.93	1	11	11	21	2.04399e+07	375	41.7097	5.47803	0.027451
	A3	Sequence	# PSMs	# Proteins	# Protein Groups	Protein Group Accessions	Modifications	ΔCn	Area	q-Value	PEP		Exp Value	Charge	MH+ [Da]	ΔM [ppm]	RT [min]	# Missed Cleavages
	High	AGFAGDDAPR	2	1	1	P60709		0	7.95057e+06	0	0.005917		1.04654e-06	2	976.448	-0.375534	20.3104	0
	High	dDDIAALVVDNGSGMcK	2	1	1	P60709	N-Term(Acetyl); C16(Methylthio)	0	5.64393e+06	0	0.001744		2.15302e-06	2	1810.76	-1.70451	58.2959	0
	High	SYELPDGQVITIGNER	2	1	1	P60709		0	3.51591e+07	0	0.006229		2.94324e-05	2	1790.89	0.490573	46.6298	0
	High	EITALAPSTMK	2	1	1	P60709		0	8.53628e+06	0	0.03922		4.68943e-05	2	1161.62	0.844566	30.2241	0
	High	DSYVGDEAQSK	2	1	1	P60709		0	7.8446e+06	0	0.03091		0.00020533	2	1198.52	-0.421507	18.3679	0
	High	DLYANTVLSGGTTMYPGIADR	2	1	1	P60709		0	3.30555e+06	0	0.02187		0.0080915	2	2215.07	1.68246	49.7399	0
	High	LcYVALDFEQEMATAASSSSLEK	1	1	1	P60709	C2(Methylthio)	0	580453	0	0.03983		0.0212076	2	2539.14	-1.3532	65.6322	0
	High	VAPEEHPVLLTEAPLNPK	3	1	1	P60709		0	920201	0.001	0.07235		0.0884918	2	1954.06	-2.4991	37.8858	0
	High	GYSFTTTAER	2	1	1	P60709		0	1.76243e+07	0.003	0.1148		0.00144354	2	1132.53	0.379725	27.0745	0
	High	QEYDESGPSIVHR	1	1	1	P60709		0	5.89257e+06	0.003	0.1174		0.0162351	2	1516.7	-0.661663	23.5094	0
	High	DLYANTVLSGGTTmYPGIADR	1	1	1	P60709	M14(Oxidation)	0	1.459e+06	0.003	0.1448		0.167441	2	2231.07	1.87045	45.3413	0
	High	HQGVMVGMGQK	1	1	1	P60709		0	1.98431e+06	0.009	0.2553		0.356027	2	1171.57	-0.345681	20.5169	0
P35579	Myosin-9 OS=Homo sapiens OX=9606 GN=MYH9 PE=1 SV=4 - [MYH9_HUMAN]	313.998	8.57	1	11	11	19	2.19557e+06	1960	226.392	5.60498	0.0248366
	A3	Sequence	# PSMs	# Proteins	# Protein Groups	Protein Group Accessions	Modifications	ΔCn	Area	q-Value	PEP		Exp Value	Charge	MH+ [Da]	ΔM [ppm]	RT [min]	# Missed Cleavages
	High	ELEDATETADAMNR	2	1	1	P35579		0	1.81447e+06	0	0.008789		3.03874e-06	2	1565.68	0.605201	26.0606	0
	High	DELADEIANSSGK	1	1	1	P35579		0	911442	0	0.04199		0.000481246	2	1348.62	0.163948	30.1345	0
	High	IAEFTTNLTEEEEK	2	1	1	P35579		0	2.86898e+06	0	0.03859		0.00144017	2	1653.78	-2.37006	35.5936	0
	High	LTEMETLQSQLMAEK	2	1	1	P35579		0	1.6076e+06	0	0.03513		0.00195407	2	1751.86	0.780784	46.5969	0
	High	DFSALESQLQDTQELLQEENR	2	1	1	P35579		0	621180	0	0.01099		0.00207963	2	2493.18	0.509097	57.0706	0
	High	NTDQASMPDNTAAQK	2	1	1	P35579		0	1.33496e+06	0	0.06704		0.00104728	2	1591.7	-0.257433	17.8737	0
	High	IAQLEEQLDNETK	2	1	1	P35579		0	1.90328e+06	0	0.03117		0.00434847	2	1530.76	-1.73169	31.3044	0
	High	NTDQASmPDNTAAQK	1	1	1	P35579	M7(Oxidation)	0	130217	0	0.02047		0.00368434	2	1607.7	0.630177	17.903	0
	High	LQVELDNVTGLLSQSDSK	2	1	1	P35579		0	1.44841e+06	0	0.06129		0.0163158	2	1946.01	-0.325602	51.3713	0
	High	IIGLDQVAGMSETALPGAFK	1	1	1	P35579		0	1.63657e+06	0	0.03548		0.0582794	2	2018.06	-0.977515	55.9725	0
	High	NFINNPLAQADWAAK	1	1	1	P35579		0	656638	0.001	0.08175		0.725835	2	1672.84	-0.13125	50.4363	0
	High	ALEQQVEEMK	1	1	1	P35579		0	1.44093e+06	0.003	0.1258		0.0350287	2	1204.59	-0.662109	27.8411	0
P05787	Keratin, type II cytoskeletal 8 OS=Homo sapiens OX=9606 GN=KRT8 PE=1 SV=7 - [K2C8_HUMAN]	298.992	19.46	1	6	7	13	3.41914e+06	483	53.6711	5.59229	-
	A3	Sequence	# PSMs	# Proteins	# Protein Groups	Protein Group Accessions	Modifications	ΔCn	Area	q-Value	PEP		Exp Value	Charge	MH+ [Da]	ΔM [ppm]	RT [min]	# Missed Cleavages
	High	ELQSQISDTSVVLSMDNSR	2	1	1	P05787		0	1.6786e+06	0	0.000773		4.79303e-07	2	2109.01	-1.59422	42.5701	0
	High	LEAELGNMQGLVEDFK	2	1	1	P05787		0	4.68702e+06	0	0.00276		0.00013854	2	1792.88	-1.07354	54.3079	0
	High	SLDMDSIIAEVK	2	1	1	P05787		0	1.70184e+06	0	0.02805		0.000458653	2	1320.67	0.320571	51.4942	0
	High	LLEGEESR	2	2	2	P05787;P08729		0	1.14661e+06	0	0.03456		0.000841928	2	932.469	0.490455	18.2204	0
	High	ASLEAAIADAEQR	2	1	1	P05787		0	1.80706e+06	0	0.03368		0.00696687	2	1344.67	-2.17774	40.4398	0
	High	SNMDNMFESYINNLR	2	1	1	P05787		0	2.15122e+06	0	0.06346		0.00334766	2	1847.8	-0.170002	57.0421	0
	High	LVSESSDVLPK	1	1	1	P05787		0	3.41918e+06	0.003	0.1364		0.00728484	2	1173.64	1.10551	27.2806	0
P07355	Annexin A2 OS=Homo sapiens OX=9606 GN=ANXA2 PE=1 SV=2 - [ANXA2_HUMAN]	279.363	35.1	1	10	10	19	7.61083e+06	339	38.5798	7.75244	0.0248366
	A3	Sequence	# PSMs	# Proteins	# Protein Groups	Protein Group Accessions	Modifications	ΔCn	Area	q-Value	PEP		Exp Value	Charge	MH+ [Da]	ΔM [ppm]	RT [min]	# Missed Cleavages
	High	QDIAFAYQR	2	1	1	P07355		0	1.48377e+06	0	0.03325		0.000135308	2	1111.56	2.33039	31.2952	0
	High	GVDEVTIVNILTNR	3	1	1	P07355		0	4.70904e+06	0	0.03822		0.000431	2	1542.85	-0.864416	55.3908	0
	High	TNQELQEINR	2	1	1	P07355		0	5.92484e+06	0	0.02913		0.000477262	2	1244.62	-0.0232171	22.2556	0
	High	DALNIETAIK	2	1	1	P07355		0	3.85146e+06	0	0.04551		0.00396746	2	1087.6	0.32893	37.1455	0
	High	AEDGSVIDYELIDQDAR	2	1	1	P07355		0	5.14376e+06	0	0.01529		0.00257138	2	1908.88	-0.310079	43.8556	0
	High	TPAQYDASELK	2	1	1	P07355		0	1.17639e+07	0	0.06701		0.0447621	2	1222.59	-0.725908	23.7451	0
	High	GLGTDEDSLIEIIcSR	1	1	1	P07355	C14(Methylthio)	0	0	0	0.04757		0.0822563	2	1766.82	-3.10829	66.5143	0
	High	AYTNFDAER	2	1	1	P07355		0	3.34778e+06	0.001	0.07466		0.00374452	2	1086.49	0.0494444	24.6731	0
	High	SYSPYDMLESIR	1	1	1	P07355		0	4.50352e+06	0.001	0.0878		0.00759371	2	1460.67	0.838259	52.4067	0
	High	SLYYYIQQDTK	2	1	1	P07355		0	5.04687e+06	0.003	0.1324		0.00957677	2	1421.69	-1.44669	40.0952	0
P08195	4F2 cell-surface antigen heavy chain OS=Homo sapiens OX=9606 GN=SLC3A2 PE=1 SV=3 - [4F2_HUMAN]	275.778	12.38	1	6	6	10	3.97914e+06	630	67.9517	5.0083	0.0130719
	A3	Sequence	# PSMs	# Proteins	# Protein Groups	Protein Group Accessions	Modifications	ΔCn	Area	q-Value	PEP		Exp Value	Charge	MH+ [Da]	ΔM [ppm]	RT [min]	# Missed Cleavages
	High	VAEDEAEAAAAAK	2	1	1	P08195		0	6.97827e+06	0	0.000157045		3.87054e-11	2	1245.59	-0.840674	19.6147	0
	High	DASSFLAEWQNITK	2	1	1	P08195		0	1.38367e+06	0	0.02211		5.01396e-05	2	1609.79	0.203158	57.6197	0
	High	GQSEDPGSLLSLFR	2	1	1	P08195		0	1.56243e+06	0	0.01656		0.000318613	2	1505.76	-0.535749	56.5048	0
	High	DDVAQTDLLQIDPNFGSK	1	1	1	P08195		0	2.09084e+06	0	0.006042		0.000764627	2	1975.96	0.76245	49.7283	0
	High	EEGSPLELER	1	1	1	P08195		0	2.8683e+06	0.003	0.1421		0.113603	2	1158.56	0.313503	29.1384	0
	High	VAGSPGWVR	2	1	1	P08195		0	630408	0.005	0.202		0.149467	2	928.499	-0.84889	26.4741	0
P11142	Heat shock cognate 71 kDa protein OS=Homo sapiens OX=9606 GN=HSPA8 PE=1 SV=1 - [HSP7C_HUMAN]	256.857	16.41	1	6	8	18	2.0843e+07	646	70.8542	5.51611	0.0235294
	A3	Sequence	# PSMs	# Proteins	# Protein Groups	Protein Group Accessions	Modifications	ΔCn	Area	q-Value	PEP		Exp Value	Charge	MH+ [Da]	ΔM [ppm]	RT [min]	# Missed Cleavages
	High	IINEPTAAAIAYGLDK	6	2	2	P11021;P11142		0	4.03849e+07	0	0.007844		8.80321e-06	2	1659.9	1.26223	45.2749	0
	High	SINPDEAVAYGAAVQAAILSGDK	2	1	1	P11142		0	1.21296e+06	0	0.01069		0.000278259	2	2260.14	-1.1359	58.4037	0
	High	VEIIANDQGNR	5	2	2	P11021;P11142		0	1.82662e+07	0	0.02415		0.000422833	2	1228.63	2.38293	21.5369	0
	High	FEELNADLFR	1	1	1	P11142		0	2.43214e+06	0	0.05327		0.00271135	2	1253.62	1.65151	46.9523	0
	High	NQVAMNPTNTVFDAK	1	1	1	P11142		0	1.04028e+06	0.001	0.08218		0.0498475	2	1649.79	-4.4684	35.2026	0
	High	TTPSYVAFTDTER	1	1	1	P11142		0	3.87788e+06	0.003	0.1295		0.0520969	2	1487.7	-2.031	35.5126	0
	High	VcNPIITK	1	1	1	P11142	C2(Methylthio)	0	0	0.006	0.2071		0.0469242	2	933.491	1.05613	30.3253	0
	High	cNEIINWLDK	1	1	1	P11142	C1(Methylthio)	0	500993	0.008	0.2424		0.569489	2	1293.6	-0.138493	53.395	0
P06733	Alpha-enolase OS=Homo sapiens OX=9606 GN=ENO1 PE=1 SV=2 - [ENOA_HUMAN]	246.003	21.89	1	5	5	12	4.76153e+06	434	47.1393	7.38623	0.0156863
	A3	Sequence	# PSMs	# Proteins	# Protein Groups	Protein Group Accessions	Modifications	ΔCn	Area	q-Value	PEP		Exp Value	Charge	MH+ [Da]	ΔM [ppm]	RT [min]	# Missed Cleavages
	High	VVIGMDVAASEFFR	4	1	1	P06733		0	2.88977e+06	0	0.003008		1.20099e-05	2	1540.78	-1.37072	64.4935	0
	High	SGETEDTFIADLVVGLcTGQIK	3	1	1	P06733	C17(Methylthio)	0	695881	0	0.006503		4.66162e-05	2	2342.13	-0.10698	68.1976	0
	High	AAVPSGASTGIYEALELR	2	1	1	P06733		0	2.5591e+06	0	0.01009		0.000552115	2	1804.94	-0.486701	50.2471	0
	High	FTASAGIQVVGDDLTVTNPK	2	1	1	P06733		0	8.83571e+06	0	0.05537		0.00310575	2	2033.06	1.52075	45.9207	0
	High	DYPVVSIEDPFDQDDWGAWQK	1	1	1	P06733		0	723706	0.003	0.1382		0.0386865	2	2510.11	-1.35276	58.9733	0
P04406	Glyceraldehyde-3-phosphate dehydrogenase OS=Homo sapiens OX=9606 GN=GAPDH PE=1 SV=3 - [G3P_HUMAN]	197.7	14.63	1	3	3	10	6.87376e+06	335	36.0304	8.45557	0.0130719
	A3	Sequence	# PSMs	# Proteins	# Protein Groups	Protein Group Accessions	Modifications	ΔCn	Area	q-Value	PEP		Exp Value	Charge	MH+ [Da]	ΔM [ppm]	RT [min]	# Missed Cleavages
	High	LVINGNPITIFQER	2	1	1	P04406		0	1.34894e+06	0	0.004232		7.28495e-07	2	1613.91	3.7107	53.2124	0
	High	WGDAGAEYVVESTGVFTTMEK	6	1	1	P04406		0	7.99249e+06	0	0.004876		0.000176862	2	2277.04	-0.307499	61.6329	0
	High	VPTANVSVVDLTcR	2	1	1	P04406	C13(Methylthio)	0	1.12798e+07	0	0.02185		0.000553819	2	1519.76	0.96879	46.2297	0
P04083	Annexin A1 OS=Homo sapiens OX=9606 GN=ANXA1 PE=1 SV=2 - [ANXA1_HUMAN]	178.898	23.12	1	6	6	10	4.87343e+06	346	38.69	7.02002	0.0130719
	A3	Sequence	# PSMs	# Proteins	# Protein Groups	Protein Group Accessions	Modifications	ΔCn	Area	q-Value	PEP		Exp Value	Charge	MH+ [Da]	ΔM [ppm]	RT [min]	# Missed Cleavages
	High	GVDEATIIDILTK	2	1	1	P04083		0	1.4727e+06	0	0.01135		0.00012112	2	1387.77	0.461883	57.1194	0
	High	GTDVNVFNTILTTR	2	1	1	P04083		0	4.42237e+06	0	0.02791		0.00303479	2	1550.82	-0.506431	52.6567	0
	High	MYGISLcQAILDETK	1	1	1	P04083	C7(Methylthio)	0	902420	0	0.06482		0.00748959	2	1730.82	-0.447774	66.6037	0
	High	TPAQFDADELR	2	1	1	P04083		0	5.47566e+06	0	0.02972		0.0166779	2	1262.6	-0.0787917	31.0515	0
	High	SEDFGVNEDLADSDAR	1	1	1	P04083		0	4.72226e+06	0	0.03487		0.0137693	2	1739.74	1.4447	34.2652	0
	High	DITSDTSGDFR	2	1	1	P04083		0	3.67051e+06	0.003	0.09625		0.000382958	2	1213.53	1.25606	26.5267	0
Q9UJZ1	Stomatin-like protein 2, mitochondrial OS=Homo sapiens OX=9606 GN=STOML2 PE=1 SV=1 - [STML2_HUMAN]	174.102	17.7	1	4	4	6	1.22467e+06	356	38.5102	7.38623	0.00784314
	A3	Sequence	# PSMs	# Proteins	# Protein Groups	Protein Group Accessions	Modifications	ΔCn	Area	q-Value	PEP		Exp Value	Charge	MH+ [Da]	ΔM [ppm]	RT [min]	# Missed Cleavages
	High	ASYGVEDPEYAVTQLAQTTMR	2	1	1	Q9UJZ1		0	713032	0	0.000511		1.29391e-07	2	2330.09	-1.37063	54.1999	0
	High	DVQGTDASLDEELDR	1	1	1	Q9UJZ1		0	898582	0	0.01776		0.000143018	2	1662.74	-0.582733	32.8099	0
	High	AEQINQAAGEASAVLAK	2	1	1	Q9UJZ1		0	2062401	0	0.01283		0.000464317	2	1670.87	-2.32834	35.3263	0
	High	ESAINVAEGK	1	1	1	Q9UJZ1		0	589830	0.003	0.1195		0.177616	2	1017.52	0.774352	21.3898	0
P35908	Keratin, type II cytoskeletal 2 epidermal OS=Homo sapiens OX=9606 GN=KRT2 PE=1 SV=2 - [K22E_HUMAN]	154.85	5.95	1	1	3	6	2.67886e+06	639	65.3932	8.00146	-
	A3	Sequence	# PSMs	# Proteins	# Protein Groups	Protein Group Accessions	Modifications	ΔCn	Area	q-Value	PEP		Exp Value	Charge	MH+ [Da]	ΔM [ppm]	RT [min]	# Missed Cleavages
	High	NLDLDSIIAEVK	2	2	2	P13647;P35908		0	1.47924e+06	0	0.01035		5.39252e-05	2	1329.73	-0.527857	55.718	0
	High	FLEQQNQVLQTK	2	2	2	P35908;P04264		0	5.84832e+06	0	0.01252		0.0001693	2	1475.79	0.582138	29.2408	0
	High	GFSSGSAVVSGGSR	2	1	1	P35908		0	709023	0	0.02797		0.000323782	2	1254.61	-1.08932	22.0369	0
P04264	Keratin, type II cytoskeletal 1 OS=Homo sapiens OX=9606 GN=KRT1 PE=1 SV=6 - [K2C1_HUMAN]	144.737	5.59	1	2	3	6	2.67967e+06	644	65.999	8.11865	-
	A3	Sequence	# PSMs	# Proteins	# Protein Groups	Protein Group Accessions	Modifications	ΔCn	Area	q-Value	PEP		Exp Value	Charge	MH+ [Da]	ΔM [ppm]	RT [min]	# Missed Cleavages
	High	SLDLDSIIAEVK	2	1	1	P04264		0	1.53313e+06	0	0.003816		5.0389e-06	2	1302.72	0.425681	55.9548	0
	High	FLEQQNQVLQTK	2	2	2	P35908;P04264		0	5.84832e+06	0	0.01252		0.0001693	2	1475.79	0.582138	29.2408	0
	High	SKAEAESLYQSK	2	1	1	P04264		0	657572	0	0.0125		0.000502797	2	1340.67	0.604358	19.3858	1
P21796	Voltage-dependent anion-selective channel protein 1 OS=Homo sapiens OX=9606 GN=VDAC1 PE=1 SV=2 - [VDAC1_HUMAN]	141.064	18.73	1	4	4	8	3.77436e+06	283	30.7536	8.54346	0.0104575
	A3	Sequence	# PSMs	# Proteins	# Protein Groups	Protein Group Accessions	Modifications	ΔCn	Area	q-Value	PEP		Exp Value	Charge	MH+ [Da]	ΔM [ppm]	RT [min]	# Missed Cleavages
	High	SENGLEFTSSGSANTETTK	4	1	1	P21796		0	2.56455e+06	0	0.01122		0.000107199	2	1959.88	0.308319	27.3508	0
	High	VTQSNFAVGYK	2	1	1	P21796		0	3200480	0	0.06826		0.000702482	2	1213.62	1.1576	28.1373	0
	High	WTEYGLTFTEK	1	1	1	P21796		0	2.90858e+06	0	0.03745		0.000847989	2	1374.66	-0.629554	44.8262	0
	High	YQIDPDAcFSAK	1	1	1	P21796	C8(Methylthio)	0	5.21403e+06	0	0.04683		0.00979643	2	1403.6	0.37723	46.5109	0
P62258	14-3-3 protein epsilon OS=Homo sapiens OX=9606 GN=YWHAE PE=1 SV=1 - [1433E_HUMAN]	139.687	16.08	1	2	3	6	911580	255	29.1554	4.7417	0.00784314
	A3	Sequence	# PSMs	# Proteins	# Protein Groups	Protein Group Accessions	Modifications	ΔCn	Area	q-Value	PEP		Exp Value	Charge	MH+ [Da]	ΔM [ppm]	RT [min]	# Missed Cleavages
	High	LIccDILDVLDK	2	1	1	P62258	C3(Methylthio); C4(Methylthio)	0	444604	0	0.0004956		4.48257e-08	2	1454.68	-0.459616	67.333	0
	High	AAFDDAIAELDTLSEESYK	2	1	1	P62258		0	1.072e+06	0	0.008168		0.00311055	2	2087.96	-1.40674	58.3836	0
	High	DSTLIMQLLR	2	4	4	P31946;P62258;P61981;P31947		0	1.21813e+06	0.001	0.07128		0.018127	2	1189.66	-0.653507	56.8341	0
P08729	Keratin, type II cytoskeletal 7 OS=Homo sapiens OX=9606 GN=KRT7 PE=1 SV=5 - [K2C7_HUMAN]	138.936	6.82	1	2	3	6	978268	469	51.3543	5.47803	-
	A3	Sequence	# PSMs	# Proteins	# Protein Groups	Protein Group Accessions	Modifications	ΔCn	Area	q-Value	PEP		Exp Value	Charge	MH+ [Da]	ΔM [ppm]	RT [min]	# Missed Cleavages
	High	GQLEALQVDGGR	2	1	1	P08729		0	1.05273e+06	0	0.01153		1.21449e-05	2	1242.64	0.461442	29.5486	0
	High	LLEGEESR	2	2	2	P05787;P08729		0	1.14661e+06	0	0.03456		0.000841928	2	932.469	0.490455	18.2204	0
	High	SLDLDGIIAEVK	2	1	1	P08729		0	735469	0	0.04124		0.00311585	2	1272.71	0.676225	53.9939	0
Q04695	Keratin, type I cytoskeletal 17 OS=Homo sapiens OX=9606 GN=KRT17 PE=1 SV=2 - [K1C17_HUMAN]	133.61	13.19	1	4	4	7	2.99542e+06	432	48.076	5.021	-
	A3	Sequence	# PSMs	# Proteins	# Protein Groups	Protein Group Accessions	Modifications	ΔCn	Area	q-Value	PEP		Exp Value	Charge	MH+ [Da]	ΔM [ppm]	RT [min]	# Missed Cleavages
	High	EVATNSELVQSGK	2	1	1	Q04695		0	2.86168e+06	0	0.006383		5.68659e-06	2	1361.69	0.687887	20.6881	0
	High	ASLEGNLAETENR	2	1	1	Q04695		0	2.37284e+06	0	0.01199		0.000377572	2	1403.68	0.966414	26.3896	0
	High	ALEEANTELEVK	2	1	1	Q04695		0	3.75173e+06	0	0.05108		0.00568489	2	1345.69	0.632468	28.4745	0
	High	ILTATVDNANILLQIDNAR	1	1	1	Q04695		0	632329	0.003	0.09612		0.653772	2	2068.14	-0.518256	53.1659	0
P25705	ATP synthase subunit alpha, mitochondrial OS=Homo sapiens OX=9606 GN=ATP5F1A PE=1 SV=1 - [ATPA_HUMAN]	127.983	11.39	1	4	4	6	2.37277e+06	553	59.7136	9.12939	0.00784314
	A3	Sequence	# PSMs	# Proteins	# Protein Groups	Protein Group Accessions	Modifications	ΔCn	Area	q-Value	PEP		Exp Value	Charge	MH+ [Da]	ΔM [ppm]	RT [min]	# Missed Cleavages
	High	ILGADTSVDLEETGR	2	1	1	P25705		0	3.70727e+06	0	0.006355		3.13524e-06	2	1575.79	-0.672377	35.4501	0
	High	GMSLNLEPDNVGVVVFGNDK	2	1	1	P25705		0	1.61913e+06	0	0.009065		0.00362159	2	2104.04	-0.309018	54.3128	0
	High	EIVTNFLAGFEA	1	1	1	P25705		0	496822	0.001	0.08271		0.536241	2	1310.66	0.470279	60.3686	0
	High	TGAIVDVPVGEELLGR	1	1	1	P25705		0	1.7919e+06	0.008	0.2324		0.450758	2	1624.89	-0.232005	50.3289	0
P31947	14-3-3 protein sigma OS=Homo sapiens OX=9606 GN=SFN PE=1 SV=1 - [1433S_HUMAN]	125.007	14.11	1	2	3	7	1.32409e+06	248	27.7567	4.7417	0.00915033
	A3	Sequence	# PSMs	# Proteins	# Protein Groups	Protein Group Accessions	Modifications	ΔCn	Area	q-Value	PEP		Exp Value	Charge	MH+ [Da]	ΔM [ppm]	RT [min]	# Missed Cleavages
	High	SNEEGSEEKGPEVR	3	1	1	P31947		0	1.98772e+06	0	0.005561		2.38516e-05	2	1546.7	0.233114	16.2095	1
	High	SAYQEAMDISK	2	1	1	P31947		0	766424	0	0.05867		0.00109468	2	1242.57	-0.152241	29.9887	0
	High	DSTLIMQLLR	2	4	4	P31946;P62258;P61981;P31947		0	1.21813e+06	0.001	0.07128		0.018127	2	1189.66	-0.653507	56.8341	0
P08238	Heat shock protein HSP 90-beta OS=Homo sapiens OX=9606 GN=HSP90AB1 PE=1 SV=4 - [HS90B_HUMAN]	123.69	6.77	1	3	4	7	6.87182e+06	724	83.2121	5.03369	0.00915033
	A3	Sequence	# PSMs	# Proteins	# Protein Groups	Protein Group Accessions	Modifications	ΔCn	Area	q-Value	PEP		Exp Value	Charge	MH+ [Da]	ΔM [ppm]	RT [min]	# Missed Cleavages
	High	ELISNASDALDK	2	2	2	P14625;P08238		0	1.13943e+07	0	0.02489		0.000376415	2	1275.64	-0.194135	29.8047	0
	High	NPDDITQEEYGEFYK	2	1	1	P08238		0	1.97368e+06	0	0.008337		0.00108396	2	1847.8	-0.807164	39.1166	0
	High	ADLINNLGTIAK	1	1	1	P08238		0	3.78943e+06	0.001	0.07846		0.0323369	2	1242.7	-0.722616	41.1452	0
	High	EDQTEYLEER	2	1	1	P08238		0	5.43168e+06	0.003	0.113		0.00754757	2	1311.57	1.42092	25.2575	0
P08758	Annexin A5 OS=Homo sapiens OX=9606 GN=ANXA5 PE=1 SV=2 - [ANXA5_HUMAN]	118.482	19.69	1	4	4	6	2.16965e+06	320	35.9144	5.04639	0.00784314
	A3	Sequence	# PSMs	# Proteins	# Protein Groups	Protein Group Accessions	Modifications	ΔCn	Area	q-Value	PEP		Exp Value	Charge	MH+ [Da]	ΔM [ppm]	RT [min]	# Missed Cleavages
	High	GAGTDDHTLIR	2	1	1	P08758		0	1.37302e+06	0	0.01226		1.42758e-05	2	1155.57	-2.08358	19.5262	0
	High	DPDAGIDEAQVEQDAQALFQAGELK	1	1	1	P08758		0	433858	0	0.01038		0.00449717	2	2658.26	1.42659	58.1776	0
	High	YMTISGFQIEETIDR	2	1	1	P08758		0	2.23998e+06	0	0.06852		0.0784494	2	1802.86	-1.9173	52.1868	0
	High	GTVTDFPGFDER	1	1	1	P08758		0	2.89596e+06	0.001	0.08271		0.00138136	2	1340.61	-0.492102	39.3581	0
Q14697	Neutral alpha-glucosidase AB OS=Homo sapiens OX=9606 GN=GANAB PE=1 SV=3 - [GANAB_HUMAN]	115.13	3.39	1	2	2	4	1.20379e+06	944	106.807	6.13818	0.00522876
	A3	Sequence	# PSMs	# Proteins	# Protein Groups	Protein Group Accessions	Modifications	ΔCn	Area	q-Value	PEP		Exp Value	Charge	MH+ [Da]	ΔM [ppm]	RT [min]	# Missed Cleavages
	High	DPAEGDGAQPEETPR	2	1	1	Q14697		0	1.34666e+06	0	0.0006962		2.43808e-08	2	1568.68	0.0837747	18.2925	0
	High	MMDYLQGSGETPQTDVR	2	1	1	Q14697		0	1.06091e+06	0.001	0.07212		0.069716	2	1927.85	-1.68091	35.8785	0
P38646	Stress-70 protein, mitochondrial OS=Homo sapiens OX=9606 GN=HSPA9 PE=1 SV=2 - [GRP75_HUMAN]	106.689	8.69	1	4	4	8	1.82202e+06	679	73.6348	6.16357	0.0104575
	A3	Sequence	# PSMs	# Proteins	# Protein Groups	Protein Group Accessions	Modifications	ΔCn	Area	q-Value	PEP		Exp Value	Charge	MH+ [Da]	ΔM [ppm]	RT [min]	# Missed Cleavages
	High	VINEPTAAALAYGLDK	2	1	1	P38646		0	1.79612e+06	0	0.01084		0.00334541	2	1645.88	-0.343513	44.3991	0
	High	QAVTNPNNTFYATK	2	1	1	P38646		0	2.36786e+06	0	0.03446		0.00654413	2	1568.77	0.415862	26.6667	0
	High	SQVFSTAADGQTQVEIK	2	1	1	P38646		0	1.25656e+06	0	0.03115		0.0136903	2	1808.9	-1.30865	33.3552	0
	High	DAGQISGLNVLR	2	1	1	P38646		0	1.30209e+06	0.003	0.09676		0.0133286	2	1242.68	1.34306	39.312	0
P68366	Tubulin alpha-4A chain OS=Homo sapiens OX=9606 GN=TUBA4A PE=1 SV=1 - [TBA4A_HUMAN]	104.683	18.97	4	5	5	8	4.93322e+06	448	49.8924	5.05908	0.0104575
	A3	Sequence	# PSMs	# Proteins	# Protein Groups	Protein Group Accessions	Modifications	ΔCn	Area	q-Value	PEP		Exp Value	Charge	MH+ [Da]	ΔM [ppm]	RT [min]	# Missed Cleavages
	High	LISQIVSSITASLR	1	4	1	P68366		0	1.17209e+06	0	0.02562		0.000129467	2	1487.88	-0.350561	66.6701	0
	High	FDGALNVDLTEFQTNLVPYPR	3	4	1	P68366		0	1.85335e+06	0	0.02248		0.000685905	2	2409.21	-0.226584	58.2989	0
	High	VGINYQPPTVVPGGDLAK	2	4	1	P68366		0	1.17742e+07	0	0.03699		0.026885	2	1824.99	-0.195223	42.1791	0
	High	AVFVDLEPTVIDEIR	1	1	1	P68366		0	445626	0.003	0.1496		0.803871	2	1715.92	-0.335251	55.7262	0
	High	AVcMLSNTTAIAEAWAR	1	3	1	P68366	C3(Methylthio)	0	477661	0.004	0.1957		1.29635	2	1853.87	1.3843	57.4959	0
P13667	Protein disulfide-isomerase A4 OS=Homo sapiens OX=9606 GN=PDIA4 PE=1 SV=2 - [PDIA4_HUMAN]	104.271	7.6	1	4	4	6	820920	645	72.887	5.07178	0.00784314
	A3	Sequence	# PSMs	# Proteins	# Protein Groups	Protein Group Accessions	Modifications	ΔCn	Area	q-Value	PEP		Exp Value	Charge	MH+ [Da]	ΔM [ppm]	RT [min]	# Missed Cleavages
	High	MDATANDVPSDR	2	1	1	P13667		0	733428	0	0.01131		4.53378e-05	2	1291.56	-0.838309	19.8696	0
	High	GESDPAYQQYQDAANNLR	2	1	1	P13667		0	1.05431e+06	0	0.008823		0.00139087	2	2039.9	-0.6976	36.1097	0
	High	KGQAVDYEGSR	1	1	1	P13667		0	146957	0.005	0.2002		0.752246	2	1209.59	-0.32613	16.933	1
	High	FIEEHATK	1	1	1	P13667		0	675021	0.008	0.2351		0.106489	2	974.494	0.0389524	16.7948	0
P02790	Hemopexin OS=Homo sapiens OX=9606 GN=HPX PE=1 SV=2 - [HEMO_HUMAN]	99.9133	8.87	1	4	4	7	3.69962e+06	462	51.6433	7.02002	0.00915033
	A3	Sequence	# PSMs	# Proteins	# Protein Groups	Protein Group Accessions	Modifications	ΔCn	Area	q-Value	PEP		Exp Value	Charge	MH+ [Da]	ΔM [ppm]	RT [min]	# Missed Cleavages
	High	EWFWDLATGTMK	1	1	1	P02790		0	1.81705e+06	0	0.02602		4.1158e-05	2	1484.67	-9.47385	65.2518	0
	High	VDGALcMEK	2	1	1	P02790	C6(Methylthio)	0	3.51248e+06	0	0.06207		0.000317731	2	1011.43	0.223023	30.6586	0
	High	DYFMPcPGR	2	1	1	P02790	C6(Methylthio)	0	5.76932e+06	0	0.05781		0.00360854	2	1131.44	1.07173	45.0837	0
	High	EWFWDLATGTmK	1	1	1	P02790	M11(Oxidation)	0	530193	0	0.0692		0.095606	2	1500.68	-0.0462746	56.4618	0
	High	YYcFQGNQFLR	1	1	1	P02790	C3(Methylthio)	0	1.38978e+06	0.008	0.2305		0.318864	2	1484.65	1.20824	51.6028	0
P06748	Nucleophosmin OS=Homo sapiens OX=9606 GN=NPM1 PE=1 SV=2 - [NPM_HUMAN]	96.89	11.9	1	2	2	4	758620	294	32.5548	4.77979	0.00522876
	A3	Sequence	# PSMs	# Proteins	# Protein Groups	Protein Group Accessions	Modifications	ΔCn	Area	q-Value	PEP		Exp Value	Charge	MH+ [Da]	ΔM [ppm]	RT [min]	# Missed Cleavages
	High	MSVQPTVSLGGFEITPPVVLR	2	1	1	P06748		0	825687	0	0.007576		0.000506638	2	2227.21	-2.08162	58.6155	0
	High	MTDQEAIQDLWQWR	2	1	1	P06748		0	691554	0	0.0104		0.00205261	2	1819.84	-0.252914	57.4913	0
P05783	Keratin, type I cytoskeletal 18 OS=Homo sapiens OX=9606 GN=KRT18 PE=1 SV=2 - [K1C18_HUMAN]	95.12	6.74	1	3	3	6	1.65458e+06	430	48.0285	5.45264	-
	A3	Sequence	# PSMs	# Proteins	# Protein Groups	Protein Group Accessions	Modifications	ΔCn	Area	q-Value	PEP		Exp Value	Charge	MH+ [Da]	ΔM [ppm]	RT [min]	# Missed Cleavages
	High	AQIFANTVDNAR	2	1	1	P05783		0	1.91134e+06	0	0.02194		0.000370375	2	1319.67	0.76606	29.233	0
	High	ETMQSLNDR	2	1	1	P05783		0	1.8199e+06	0	0.0465		0.00413325	2	1093.49	0.00822507	19.6723	0
	High	YETELAMR	2	1	1	P05783		0	1232505	0	0.06025		0.0287321	2	1012.48	1.088	27.0956	0
Q01650	Large neutral amino acids transporter small subunit 1 OS=Homo sapiens OX=9606 GN=SLC7A5 PE=1 SV=2 - [LAT1_HUMAN]	93.69	6.71	1	2	2	4	3.85435e+06	507	54.9743	7.72314	0.00522876
	A3	Sequence	# PSMs	# Proteins	# Protein Groups	Protein Group Accessions	Modifications	ΔCn	Area	q-Value	PEP		Exp Value	Charge	MH+ [Da]	ΔM [ppm]	RT [min]	# Missed Cleavages
	High	SADGSAPAGEGEGVTLQR	2	1	1	Q01650		0	4.36719e+06	0	0.01659		0.000508705	2	1701.8	-1.03401	23.8079	0
	High	GDVSNLDPNFSFEGTK	2	1	1	Q01650		0	3.34152e+06	0	0.03078		0.00725076	2	1726.79	0.121935	41.8446	0
Q99623	Prohibitin-2 OS=Homo sapiens OX=9606 GN=PHB2 PE=1 SV=2 - [PHB2_HUMAN]	84.7433	10.37	1	2	2	3	2.07273e+06	299	33.2759	9.83252	0.00392157
	A3	Sequence	# PSMs	# Proteins	# Protein Groups	Protein Group Accessions	Modifications	ΔCn	Area	q-Value	PEP		Exp Value	Charge	MH+ [Da]	ΔM [ppm]	RT [min]	# Missed Cleavages
	High	IVQAEGEAEAAK	2	1	1	Q99623		0	3.28861e+06	0	0.007138		0.000284973	2	1215.62	0.500716	18.2801	0
	High	IYLTADNLVLNLQDESFTR	1	1	1	Q99623		0	856844	0	0.02833		0.0051742	2	2225.14	-0.483058	57.2838	0
P13647	Keratin, type II cytoskeletal 5 OS=Homo sapiens OX=9606 GN=KRT5 PE=1 SV=3 - [K2C5_HUMAN]	83.0133	5.08	1	2	3	4	876274	590	62.34	7.73779	-
	A3	Sequence	# PSMs	# Proteins	# Protein Groups	Protein Group Accessions	Modifications	ΔCn	Area	q-Value	PEP		Exp Value	Charge	MH+ [Da]	ΔM [ppm]	RT [min]	# Missed Cleavages
	High	NLDLDSIIAEVK	2	2	2	P13647;P35908		0	1.47924e+06	0	0.01035		5.39252e-05	2	1329.73	-0.527857	55.718	0
	High	HEISEMNR	1	1	1	P13647		0	743070	0.003	0.1202		0.0183007	2	1015.46	-0.209159	16.5362	0
	High	TEAESWYQTK	1	1	1	P13647		0	406514	0.003	0.1499		0.16082	2	1242.56	-0.371232	28.0411	0
P45880	Voltage-dependent anion-selective channel protein 2 OS=Homo sapiens OX=9606 GN=VDAC2 PE=1 SV=2 - [VDAC2_HUMAN]	82.762	14.29	1	2	2	4	4.08758e+06	294	31.5465	7.56201	0.00522876
	A3	Sequence	# PSMs	# Proteins	# Protein Groups	Protein Group Accessions	Modifications	ΔCn	Area	q-Value	PEP		Exp Value	Charge	MH+ [Da]	ΔM [ppm]	RT [min]	# Missed Cleavages
	High	ScSGVEFSTSGSSNTDTGK	2	1	1	P45880	C2(Methylthio)	0	3.55045e+06	0	0.003314		6.55191e-07	2	1896.76	0.794584	29.2466	0
	High	TGDFQLHTNVNDGTEFGGSIYQK	2	1	1	P45880		0	4.62471e+06	0	0.04678		0.272148	3	2528.17	-0.2386	40.7922	0
P14618	Pyruvate kinase PKM OS=Homo sapiens OX=9606 GN=PKM PE=1 SV=4 - [KPYM_HUMAN]	80.95	13.37	1	4	4	10	2.66852e+06	531	57.9	7.84033	0.0130719
	A3	Sequence	# PSMs	# Proteins	# Protein Groups	Protein Group Accessions	Modifications	ΔCn	Area	q-Value	PEP		Exp Value	Charge	MH+ [Da]	ΔM [ppm]	RT [min]	# Missed Cleavages
	High	FGVEQDVDMVFASFIR	2	1	1	P14618		0	621665	0	0.006202		0.000364868	2	1859.89	-2.91231	66.7368	0
	High	GADFLVTEVENGGSLGSK	1	1	1	P14618		0	1.75464e+06	0	0.02384		0.00815327	2	1779.88	0.681825	46.6581	0
	High	FDEILEASDGIMVAR	3	1	1	P14618		0	2.84377e+06	0	0.05031		0.0832024	2	1665.81	-0.730446	48.4004	0
	High	LAPITSDPTEATAVGAVEASFK	4	1	1	P14618		0	3.40716e+06	0	0.01308		0.183238	3	2175.12	1.01241	52.2476	0
P61604	10 kDa heat shock protein, mitochondrial OS=Homo sapiens OX=9606 GN=HSPE1 PE=1 SV=2 - [CH10_HUMAN]	79.2449	23.53	1	2	2	4	1.29606e+06	102	10.9249	8.92432	0.00522876
	A3	Sequence	# PSMs	# Proteins	# Protein Groups	Protein Group Accessions	Modifications	ΔCn	Area	q-Value	PEP		Exp Value	Charge	MH+ [Da]	ΔM [ppm]	RT [min]	# Missed Cleavages
	High	VLQATVVAVGSGSK	2	1	1	P61604		0	2.09913e+06	0	0.01355		2.73623e-05	2	1315.76	-0.338468	28.3793	0
	High	GGEIQPVSVK	2	1	1	P61604		0	492978	0.003	0.1259		0.00519312	2	1013.56	-0.0924474	22.3012	0
P60842	Eukaryotic initiation factor 4A-I OS=Homo sapiens OX=9606 GN=EIF4A1 PE=1 SV=1 - [IF4A1_HUMAN]	77.6739	6.65	2	2	2	3	1.75499e+06	406	46.1246	5.47803	0.00392157
	A3	Sequence	# PSMs	# Proteins	# Protein Groups	Protein Group Accessions	Modifications	ΔCn	Area	q-Value	PEP		Exp Value	Charge	MH+ [Da]	ΔM [ppm]	RT [min]	# Missed Cleavages
	High	GYDVIAQAQSGTGK	2	2	1	P60842		0	1.89808e+06	0	0.007279		4.1339e-05	2	1394.69	0.785098	27.9192	0
	High	MFVLDEADEMLSR	1	2	1	P60842		0	1.61191e+06	0	0.03793		0.0988424	2	1555.71	1.01431	54.5579	0
P30101	Protein disulfide-isomerase A3 OS=Homo sapiens OX=9606 GN=PDIA3 PE=1 SV=4 - [PDIA3_HUMAN]	77.3	8.91	1	4	4	6	1.45794e+06	505	56.7468	6.354	0.00784314
	A3	Sequence	# PSMs	# Proteins	# Protein Groups	Protein Group Accessions	Modifications	ΔCn	Area	q-Value	PEP		Exp Value	Charge	MH+ [Da]	ΔM [ppm]	RT [min]	# Missed Cleavages
	High	VVVAENFDEIVNNENK	2	1	1	P30101		0	2.17503e+06	0	0.01482		0.00106837	2	1832.9	-0.564375	41.9909	0
	High	ELSDFISYLQR	2	1	1	P30101		0	1.00427e+06	0	0.04652		0.0645931	2	1370.69	-0.167421	54.1498	0
	High	LNFAVASR	1	1	1	P30101		0	434466	0.007	0.2283		0.00740156	2	877.489	0.336353	29.8503	0
	High	YGVSGYPTLK	1	1	1	P30101		0	1.19452e+06	0.008	0.2323		0.124337	2	1084.57	0.739034	32.3956	0
P01834	Immunoglobulin kappa constant OS=Homo sapiens OX=9606 GN=IGKC PE=1 SV=2 - [IGKC_HUMAN]	72.07	31.78	2	2	2	3	1.58721e+06	107	11.7578	6.52197	0.00392157
	A3	Sequence	# PSMs	# Proteins	# Protein Groups	Protein Group Accessions	Modifications	ΔCn	Area	q-Value	PEP		Exp Value	Charge	MH+ [Da]	ΔM [ppm]	RT [min]	# Missed Cleavages
	High	VDNALQSGNSQESVTEQDSK	2	2	1	P01834		0	1.26999e+06	0	0.007824		0.000133699	2	2135.97	0.679383	21.2985	0
	High	DSTYSLSSTLTLSK	1	2	1	P01834		0	1.90442e+06	0.006	0.2174		0.318311	2	1502.76	-0.332143	41.1143	0
P07737	Profilin-1 OS=Homo sapiens OX=9606 GN=PFN1 PE=1 SV=2 - [PROF1_HUMAN]	71.0546	21.43	1	2	2	3	2.6875e+06	140	15.0446	8.26514	0.00392157
	A3	Sequence	# PSMs	# Proteins	# Protein Groups	Protein Group Accessions	Modifications	ΔCn	Area	q-Value	PEP		Exp Value	Charge	MH+ [Da]	ΔM [ppm]	RT [min]	# Missed Cleavages
	High	DSLLQDGEFSMDLR	2	1	1	P07737		0	2.05987e+06	0	0.008235		0.000123745	2	1625.75	0.572939	51.2896	0
	High	TFVNITPAEVGVLVGK	1	1	1	P07737		0	3.31514e+06	0.003	0.1242		0.00681905	2	1643.93	-1.60692	54.397	0
P62805	Histone H4 OS=Homo sapiens OX=9606 GN=H4C1 PE=1 SV=2 - [H4_HUMAN]	71.0047	31.07	1	3	3	5	2.47726e+06	103	11.3604	11.356	0.00653595
	A3	Sequence	# PSMs	# Proteins	# Protein Groups	Protein Group Accessions	Modifications	ΔCn	Area	q-Value	PEP		Exp Value	Charge	MH+ [Da]	ΔM [ppm]	RT [min]	# Missed Cleavages
	High	DAVTYTEHAK	2	1	1	P62805		0	1.52707e+06	0	0.03346		0.00021528	2	1134.54	1.64814	17.7191	0
	High	ISGLIYEETR	2	1	1	P62805		0	5.01855e+06	0	0.03633		0.00256344	2	1180.62	-0.598426	33.1849	0
	High	DNIQGITKPAIR	1	1	1	P62805		0	886170	0.003	0.1296		0.498988	2	1325.75	0.880284	26.4772	0
P04075	Fructose-bisphosphate aldolase A OS=Homo sapiens OX=9606 GN=ALDOA PE=1 SV=2 - [ALDOA_HUMAN]	70.73	12.36	1	3	3	5	1.54648e+06	364	39.3953	8.08936	0.00653595
	A3	Sequence	# PSMs	# Proteins	# Protein Groups	Protein Group Accessions	Modifications	ΔCn	Area	q-Value	PEP		Exp Value	Charge	MH+ [Da]	ΔM [ppm]	RT [min]	# Missed Cleavages
	High	GILAADESTGSIAK	2	1	1	P04075		0	1.77216e+06	0	0.01009		0.00239594	2	1332.7	0.547943	28.9888	0
	High	YTPSGQAGAAASESLFVSNHAY	2	1	1	P04075		0	2.43623e+06	0	0.04455		0.0246259	2	2228.02	-2.22883	42.6273	0
	High	QLLLTADDR	1	1	1	P04075		0	431060	0.004	0.1949		0.108875	2	1044.57	1.24304	30.0739	0
P06703	Protein S100-A6 OS=Homo sapiens OX=9606 GN=S100A6 PE=1 SV=1 - [S10A6_HUMAN]	69.7739	27.78	1	2	2	4	1.30208e+06	90	10.1733	5.47803	0.00522876
	A3	Sequence	# PSMs	# Proteins	# Protein Groups	Protein Group Accessions	Modifications	ΔCn	Area	q-Value	PEP		Exp Value	Charge	MH+ [Da]	ΔM [ppm]	RT [min]	# Missed Cleavages
	High	LQDAEIAR	2	1	1	P06703		0	1.30208e+06	0	0.03201		0.000786661	2	915.49	0.352153	19.7217	0
	High	acPLDQAIGLLVAIFHK	2	1	1	P06703	N-Term(Acetyl); C2(Methylthio)	0	0	0	0.04475		0.0434354	2	1897.01	-0.398435	69.6073	0
P61981	14-3-3 protein gamma OS=Homo sapiens OX=9606 GN=YWHAG PE=1 SV=2 - [1433G_HUMAN]	66.9894	17.41	1	2	3	4	934000	247	28.2849	4.89404	0.00522876
	A3	Sequence	# PSMs	# Proteins	# Protein Groups	Protein Group Accessions	Modifications	ΔCn	Area	q-Value	PEP		Exp Value	Charge	MH+ [Da]	ΔM [ppm]	RT [min]	# Missed Cleavages
	High	NVTELNEPLSNEER	1	1	1	P61981		0	1.00509e+06	0	0.03709		0.000622912	2	1643.79	-0.169406	29.6336	0
	High	TAFDDAIAELDTLNEDSYK	1	1	1	P61981		0	578778	0	0.0204		0.0554273	2	2130.97	0.248772	57.5534	0
	High	DSTLIMQLLR	2	4	4	P31946;P62258;P61981;P31947		0	1.21813e+06	0.001	0.07128		0.018127	2	1189.66	-0.653507	56.8341	0
P13645	Keratin, type I cytoskeletal 10 OS=Homo sapiens OX=9606 GN=KRT10 PE=1 SV=6 - [K1C10_HUMAN]	65.87	9.08	1	4	4	6	1.4272e+06	584	58.7917	5.21143	-
	A3	Sequence	# PSMs	# Proteins	# Protein Groups	Protein Group Accessions	Modifications	ΔCn	Area	q-Value	PEP		Exp Value	Charge	MH+ [Da]	ΔM [ppm]	RT [min]	# Missed Cleavages
	High	GSLGGGFSSGGFSGGSFSR	2	1	1	P13645		0	1.91477e+06	0	0.02351		0.00373948	2	1707.77	-3.41164	40.4432	0
	High	LENEIQTYR	1	1	1	P13645		0	1.31886e+06	0.003	0.09967		0.00228336	2	1165.59	2.26379	25.544	0
	High	SLLEGEGSSGGGGR	2	1	1	P13645		0	0	0.003	0.1729		0.472628	2	1262.6	1.74365	21.3539	0
	High	SQYEQLAEQNR	1	1	1	P13645		0	1.04796e+06	0.004	0.1825		0.191611	2	1365.64	0.863498	23.2765	0
P68371	Tubulin beta-4B chain OS=Homo sapiens OX=9606 GN=TUBB4B PE=1 SV=1 - [TBB4B_HUMAN]	61.21	8.76	1	3	3	5	4.44465e+06	445	49.799	4.89404	0.00653595
	A3	Sequence	# PSMs	# Proteins	# Protein Groups	Protein Group Accessions	Modifications	ΔCn	Area	q-Value	PEP		Exp Value	Charge	MH+ [Da]	ΔM [ppm]	RT [min]	# Missed Cleavages
	High	EVDEQMLNVQNK	2	1	1	P68371		0	6.42482e+06	0	0.05311		0.00124277	2	1446.69	-1.52757	28.2142	0
	High	INVYYNEATGGK	2	1	1	P68371		0	3.44191e+06	0	0.02635		0.00437909	2	1328.65	0.993762	28.5801	0
	High	AVLVDLEPGTMDSVR	1	1	1	P68371		0	3.46721e+06	0.006	0.2197		0.274703	2	1601.82	-0.120657	44.3937	0
Q9Y4L1	Hypoxia up-regulated protein 1 OS=Homo sapiens OX=9606 GN=HYOU1 PE=1 SV=1 - [HYOU1_HUMAN]	60.34	5.21	1	3	3	3	554813	999	111.266	5.22412	0.00392157
	A3	Sequence	# PSMs	# Proteins	# Protein Groups	Protein Group Accessions	Modifications	ΔCn	Area	q-Value	PEP		Exp Value	Charge	MH+ [Da]	ΔM [ppm]	RT [min]	# Missed Cleavages
	High	AEAGPEGVAPAPEGEK	1	1	1	Q9Y4L1		0	853503	0	0.0418		1.01059e-05	2	1508.73	8.00643	20.9642	0
	High	NINADEAAAMGAVYQAAALSK	1	1	1	Q9Y4L1		0	415251	0	0.05565		0.370501	2	2079.02	1.04938	54.0121	0
	High	AEPPLNASASDQGEK	1	1	1	Q9Y4L1		0	395684	0.003	0.09442		0.271282	2	1513.71	-0.0218511	19.8866	0
Q07065	Cytoskeleton-associated protein 4 OS=Homo sapiens OX=9606 GN=CKAP4 PE=1 SV=2 - [CKAP4_HUMAN]	58.28	7.31	1	3	3	5	1.13362e+06	602	65.9827	5.92236	0.00653595
	A3	Sequence	# PSMs	# Proteins	# Protein Groups	Protein Group Accessions	Modifications	ΔCn	Area	q-Value	PEP		Exp Value	Charge	MH+ [Da]	ΔM [ppm]	RT [min]	# Missed Cleavages
	High	LEGLGSSEADQDGLASTVR	2	1	1	Q07065		0	0	0	0.004837		7.90987e-05	2	1904.92	-1.77642	34.9929	0
	High	EELGQGLQGVEQK	2	1	1	Q07065		0	712830	0.003	0.1101		0.113337	2	1414.72	1.47496	28.5532	0
	High	IETNENNLESAK	1	1	1	Q07065		0	1.5544e+06	0.003	0.156		0.169984	2	1361.65	-0.647241	19.7241	0
P23528	Cofilin-1 OS=Homo sapiens OX=9606 GN=CFL1 PE=1 SV=3 - [COF1_HUMAN]	52.6236	18.67	1	2	2	3	1.57355e+06	166	18.4907	8.08936	0.00392157
	A3	Sequence	# PSMs	# Proteins	# Protein Groups	Protein Group Accessions	Modifications	ΔCn	Area	q-Value	PEP		Exp Value	Charge	MH+ [Da]	ΔM [ppm]	RT [min]	# Missed Cleavages
	High	EILVGDVGQTVDDPYATFVK	1	1	1	P23528		0	1.63956e+06	0	0.01346		0.00091607	2	2166.1	-0.275351	52.5373	0
	High	YALYDATYETK	2	1	1	P23528		0	1.50754e+06	0.003	0.1009		0.0109962	2	1337.62	-2.25691	33.3314	0
P36776	Lon protease homolog, mitochondrial OS=Homo sapiens OX=9606 GN=LONP1 PE=1 SV=2 - [LONM_HUMAN]	50.01	3.44	1	2	2	3	396290	959	106.422	6.39209	0.00392157
	A3	Sequence	# PSMs	# Proteins	# Protein Groups	Protein Group Accessions	Modifications	ΔCn	Area	q-Value	PEP		Exp Value	Charge	MH+ [Da]	ΔM [ppm]	RT [min]	# Missed Cleavages
	High	QLEVEPEEPEAENK	2	1	1	P36776		0	362637	0	0.06218		0.000243612	2	1640.77	0.292076	25.8424	0
	High	EIFDIAFPDEQAEALAVER	1	1	1	P36776		0	429944	0	0.06116		0.242063	2	2163.06	-0.436136	56.7087	0
Q07021	Complement component 1 Q subcomponent-binding protein, mitochondrial OS=Homo sapiens OX=9606 GN=C1QBP PE=1 SV=1 - [C1QBP_HUMAN]	49.6581	10.99	1	2	2	4	1.3417e+06	282	31.3426	4.84326	0.00522876
	A3	Sequence	# PSMs	# Proteins	# Protein Groups	Protein Group Accessions	Modifications	ΔCn	Area	q-Value	PEP		Exp Value	Charge	MH+ [Da]	ΔM [ppm]	RT [min]	# Missed Cleavages
	High	AFVDFLSDEIK	2	1	1	Q07021		0	1.04331e+06	0	0.007465		0.000464785	2	1283.65	0.317826	53.7168	0
	High	VEEQEPELTSTPNFVVEVIK	2	1	1	Q07021		0	1.64009e+06	0.004	0.1829		0.296299	2	2287.17	-0.761872	53.5458	0
Q00325	Phosphate carrier protein, mitochondrial OS=Homo sapiens OX=9606 GN=SLC25A3 PE=1 SV=2 - [MPCP_HUMAN]	41.54	7.73	1	2	2	4	6.38747e+06	362	40.0687	9.37842	0.00522876
	A3	Sequence	# PSMs	# Proteins	# Protein Groups	Protein Group Accessions	Modifications	ΔCn	Area	q-Value	PEP		Exp Value	Charge	MH+ [Da]	ΔM [ppm]	RT [min]	# Missed Cleavages
	High	IQTQPGYANTLR	2	1	1	Q00325		0	1.15142e+07	0	0.06195		0.0146392	2	1361.72	0.79166	26.1208	0
	High	VLYSNMLGEENTYLWR	2	1	1	Q00325		0	1.26075e+06	0	0.01865		0.0131668	2	1987.96	0.0655558	54.3392	0
P51149	Ras-related protein Rab-7a OS=Homo sapiens OX=9606 GN=RAB7A PE=1 SV=1 - [RAB7A_HUMAN]	41.05	11.59	1	2	2	3	1.49668e+06	207	23.4748	6.69775	0.00392157
	A3	Sequence	# PSMs	# Proteins	# Protein Groups	Protein Group Accessions	Modifications	ΔCn	Area	q-Value	PEP		Exp Value	Charge	MH+ [Da]	ΔM [ppm]	RT [min]	# Missed Cleavages
	High	LVTMQIWDTAGQER	2	1	1	P51149		0	2.27037e+06	0	0.04363		0.0330622	2	1647.82	-0.392085	46.3573	0
	High	TSLMNQYVNK	1	1	1	P51149		0	722991	0.003	0.1085		0.102235	2	1197.59	-0.0701848	29.6132	0
P31946	14-3-3 protein beta/alpha OS=Homo sapiens OX=9606 GN=YWHAB PE=1 SV=3 - [1433B_HUMAN]	39.2394	13.41	1	2	3	4	780070	246	28.0648	4.83057	0.00522876
	A3	Sequence	# PSMs	# Proteins	# Protein Groups	Protein Group Accessions	Modifications	ΔCn	Area	q-Value	PEP		Exp Value	Charge	MH+ [Da]	ΔM [ppm]	RT [min]	# Missed Cleavages
	High	DSTLIMQLLR	2	4	4	P31946;P62258;P61981;P31947		0	1.21813e+06	0.001	0.07128		0.018127	2	1189.66	-0.653507	56.8341	0
	High	YLSEVASGDNK	1	1	1	P31946		0	517584	0.003	0.1494		0.0638508	2	1182.56	0.840178	20.5944	0
	High	YLIPNATQPESK	1	1	1	P31946		0	604493	0.006	0.2134		0.341519	2	1360.71	1.24835	29.9152	0
Q15149	Plectin OS=Homo sapiens OX=9606 GN=PLEC PE=1 SV=3 - [PLEC_HUMAN]	35.02	1	1	3	3	4	714641	4684	531.466	5.96045	0.00522876
	A3	Sequence	# PSMs	# Proteins	# Protein Groups	Protein Group Accessions	Modifications	ΔCn	Area	q-Value	PEP		Exp Value	Charge	MH+ [Da]	ΔM [ppm]	RT [min]	# Missed Cleavages
	High	SSSVGSSSSYPISPAVSR	1	1	1	Q15149		0	677124	0.001	0.08868		0.0114872	2	1754.85	-1.22526	29.1602	0
	High	VLADPSDDTK	2	1	1	Q15149		0	871019	0.001	0.08821		0.0535159	2	1060.51	-0.764839	17.9555	0
	High	VPVDVAYQR	1	1	1	Q15149		0	595781	0.006	0.2258		0.837244	2	1046.57	2.98723	25.3979	0
P61106	Ras-related protein Rab-14 OS=Homo sapiens OX=9606 GN=RAB14 PE=1 SV=4 - [RAB14_HUMAN]	31.6824	11.63	1	2	2	3	1.38316e+06	215	23.8819	6.21436	0.00392157
	A3	Sequence	# PSMs	# Proteins	# Protein Groups	Protein Group Accessions	Modifications	ΔCn	Area	q-Value	PEP		Exp Value	Charge	MH+ [Da]	ΔM [ppm]	RT [min]	# Missed Cleavages
	High	QFAEENGLLFLEASAK	1	1	1	P61106		0	895111	0.001	0.0875		0.0756026	2	1766.89	-1.16747	53.8712	0
	High	LTSEPQPQR	2	1	1	P61106		0	1.87122e+06	0.003	0.1142		0.0167298	2	1055.55	0.096634	16.272	0
P60174	Triosephosphate isomerase OS=Homo sapiens OX=9606 GN=TPI1 PE=1 SV=3 - [TPIS_HUMAN]	29.12	8.74	1	2	2	2	541512	286	30.7717	5.92236	0.00261438
	A3	Sequence	# PSMs	# Proteins	# Protein Groups	Protein Group Accessions	Modifications	ΔCn	Area	q-Value	PEP		Exp Value	Charge	MH+ [Da]	ΔM [ppm]	RT [min]	# Missed Cleavages
	High	VVLAYEPVWAIGTGK	1	1	1	P60174		0	699644	0.001	0.07553		0.087212	2	1602.89	1.52586	53.4953	0
	High	IAVAAQNcYK	1	1	1	P60174	C8(Methylthio)	0	383379	0.008	0.2304		0.0553551	2	1126.54	0.411578	29.0947	0

## Sheet: HepG2+PA+2-bromopalmitate
Accession	Description	Score	Coverage	# Proteins	# Unique Peptides	# Peptides	# PSMs	Area	# AAs	MW [kDa]	calc. pI	Relative abundance (%)
P02787	Serotransferrin OS=Homo sapiens OX=9606 GN=TF PE=1 SV=3 - [TRFE_HUMAN]	3706.26	60.89	1	36	36	218	3.76596e+08	698	77.0136	7.12256	0.132765
	A3	Sequence	# PSMs	# Proteins	# Protein Groups	Protein Group Accessions	Modifications	ΔCn	Area	q-Value	PEP		Exp Value	Charge	MH+ [Da]	ΔM [ppm]	RT [min]	# Missed Cleavages
	High	FDEFFSEGcAPGSK	12	1	1	P02787	C9(Methylthio)	0	3.64094e+08	0	3.661e-09		4.06563e-08	2	1566.62	-0.0468103	46.7171	0
	High	DYELLcLDGTR	13	1	1	P02787	C6(Methylthio)	0	1.4792e+08	0	5.906e-07		1.73443e-07	2	1343.6	0.303222	52.3395	0
	High	cSTSSLLEAcTFR	2	1	1	P02787	C1(Methylthio); C10(Methylthio)	0	4.14151e+07	0	5.906e-07		2.0386e-07	2	1509.62	-0.63517	66.5006	0
	High	DQYELLcLDNTR	7	1	1	P02787	C7(Methylthio)	0	9.49172e+07	0	6.605e-07		2.08143e-06	2	1528.67	-2.9027	50.6083	0
	High	cDEWSVNSVGK	6	1	1	P02787	C1(Methylthio)	0	1.49898e+08	0	5.906e-07		1.38134e-06	2	1269.53	1.12156	33.6823	0
	High	SAGWNIPIGLLYcDLPEPR	3	1	1	P02787	C13(Methylthio)	0	1.30573e+07	0	5.906e-07		8.43545e-06	2	2160.06	-0.757436	67.572	0
	High	KPVEEYANcHLAR	4	1	1	P02787	C9(Methylthio)	0	2.68843e+07	0	1.793e-08		9.91565e-06	3	1575.74	0.65434	66.3959	0
	High	DGAGDVAFVK	2	1	1	P02787		0	1.31406e+08	0	5.906e-07		1.58904e-05	2	978.489	-0.653401	27.7691	0
	High	MYLGYEYVTAIR	4	1	1	P02787		0	1.94447e+08	0	5.906e-07		4.1719e-05	2	1478.74	0.370493	50.4564	0
	High	EDPQTFYYAVAVVK	7	1	1	P02787		0	3.57669e+08	0	5.906e-07		5.65114e-05	2	1629.81	-0.964924	49.1052	0
	High	IMNGEADAMSLDGGFVYIAGK	8	1	1	P02787		0	1.48563e+08	0	5.906e-07		7.3435e-05	2	2159.01	-0.0858094	53.1526	0
	High	IEcVSAETTEDcIAK	17	1	1	P02787	C3(Methylthio); C12(Methylthio)	0	3.24123e+08	0	5.906e-07		1.66932e-05	2	1703.7	-0.825019	59.9133	0
	High	ImNGEADAMSLDGGFVYIAGK	10	1	1	P02787	M2(Oxidation)	0	3.44879e+06	0	5.906e-07		0.00011261	2	2175.01	0.120029	60.2281	0
	High	DcHLAQVPSHTVVAR	4	1	1	P02787	C2(Methylthio)	0	71441971	0	5.906e-07		0.000138762	2	1678.81	-0.60502	64.5662	0
	High	SASDLTWDNLK	4	1	1	P02787		0	1.85417e+08	0	2.387e-06		0.000136887	2	1249.61	-0.551448	38.4615	0
	High	NLNEKDYELLcLDGTR	2	1	1	P02787	C11(Methylthio)	0	1.88759e+06	0	5.906e-07		0.000122017	2	1941.9	-0.861356	65.2698	1
	High	DSGFQMNQLR	3	1	1	P02787		0	6.69521e+07	0	5.906e-07		0.00014404	2	1195.55	-0.369493	32.7093	0
	High	HQTVPQNTGGK	6	1	1	P02787		0	5.69085e+07	0	5.906e-07		0.000240087	2	1166.59	0.256331	13.7486	0
	High	LcMGSGLNLcEPNNK	8	1	1	P02787	C2(Methylthio); C10(Methylthio)	0	1.50348e+08	0	5.906e-07		8.10209e-05	2	1684.7	2.13727	63.7416	0
	High	WcALSHHER	1	1	1	P02787	C2(Methylthio)	0	3.85455e+06	0	2.191e-06		9.36693e-05	2	1184.51	-1.12993	67.6504	0
	High	ASYLDcIR	11	1	1	P02787	C6(Methylthio)	0	6.8513e+07	0	7.348e-07		9.14875e-05	2	986.443	0.0361996	59.8894	0
	High	TAGWNIPMGLLYNK	4	1	1	P02787		0	4.48842e+07	0	5.906e-07		0.000696893	2	1577.82	1.68269	64.6502	0
	High	EGYYGYTGAFR	8	1	1	P02787		0	210869274	0	6.714e-07		0.000253091	2	1283.57	0.751543	37.8157	0
	High	DDTVcLAK	4	1	1	P02787	C5(Methylthio)	0	6.07452e+07	0	5.891e-05		0.00029655	2	910.403	1.82574	26.3683	0
	High	APNHAVVTR	8	1	1	P02787		0	2.16769e+07	0	8.622e-07		0.000630259	2	964.532	-0.0592399	16.2211	0
	High	SVIPSDGPSVAcVK	4	1	1	P02787	C12(Methylthio)	0	4.08025e+08	0	5.906e-07		0.000870126	2	1404.69	-0.533854	38.2985	0
	High	SDNcEDTPEAGYFAIAVVK	2	1	1	P02787	C4(Methylthio)	0	9.50725e+06	0	5.906e-07		0.000515833	2	2074.91	-0.822069	52.2103	0
	High	EFQLFSSPHGK	2	1	1	P02787		0	2.52003e+07	0	3.399e-06		0.000939114	2	1276.63	0.873399	64.7326	0
	High	DSGFQmNQLR	4	1	1	P02787	M6(Oxidation)	0	4.78899e+06	0	6.1e-07		0.000962367	2	1211.55	-0.903022	22.8495	0
	High	mYLGYEYVTAIR	5	1	1	P02787	M1(Oxidation)	0	1.81909e+07	0	5.975e-07		0.0029603	2	1494.73	0.420128	46.1177	0
	High	EGTcPEAPTDEcKPVK	11	1	1	P02787	C4(Methylthio); C12(Methylthio)	0	17739625	0	3.695e-06		0.000520868	2	1795.73	-1.2499	31.9729	0
	High	WcAVSEHEATK	5	1	1	P02787	C2(Methylthio)	0	6.32215e+06	0	5.906e-07		0.000611288	2	1306.56	0.612077	26.6905	0
	High	TAGWNIPmGLLYNK	4	1	1	P02787	M8(Oxidation)	0	1.15904e+07	0	9.469e-06		0.00530638	2	1593.81	-0.81141	50.7648	0
	High	LcmGSGLNLcEPNNK	4	1	1	P02787	C2(Methylthio); M3(Oxidation); C10(Methylthio)	0	1.13472e+07	0	5.906e-07		0.00270072	2	1700.7	1.66184	52.2405	0
	High	HSTIFENLANK	3	1	1	P02787		0	1.04698e+08	0	7.784e-07		0.0113739	2	1273.65	-1.9807	64.2894	0
	High	ADRDQYELLcLDNTR	3	1	1	P02787	C10(Methylthio)	0	3.38312e+07	0	0.0002153		0.0136297	3	1870.85	1.81412	64.1763	1
	High	DSAHGFLK	7	1	1	P02787		0	6.45986e+07	0	0.01767		0.0183257	2	874.442	-0.165072	22.0765	0
	High	EDLIWELLNQAQEHFGK	2	1	1	P02787		0	5.22804e+06	0	1.002e-05		0.279978	2	2070.03	-0.388105	67.8544	0
	High	ScHTGLGR	1	1	1	P02787	C2(Methylthio)	0	2.33399e+07	0.003	0.01789		0.00106712	2	876.381	-0.679301	17.6056	0
	High	ScHTAVGR	2	1	1	P02787	C2(Methylthio)	0	0	0.003	0.0208		0.00571757	2	876.382	0.643945	19.2685	0
	High	YLGEEYVK	1	1	1	P02787		0	1.17274e+08	0.004	0.04571		0.170996	2	1000.5	-0.394559	32.9101	0
P02768	Serum albumin OS=Homo sapiens OX=9606 GN=ALB PE=1 SV=2 - [ALBU_HUMAN]	3139.53	7.06	1	5	5	191	2.41153e+09	609	69.3215	6.27783	0.116322
	A3	Sequence	# PSMs	# Proteins	# Protein Groups	Protein Group Accessions	Modifications	ΔCn	Area	q-Value	PEP		Exp Value	Charge	MH+ [Da]	ΔM [ppm]	RT [min]	# Missed Cleavages
	High	KVPQVSTPTLVEVSR	54	1	1	P02768		0	996493140	0	5.906e-07		7.5005e-07	2	1639.94	-0.985694	60.0276	1
	High	ccTESLVNR	85	1	1	P02768	C1(Methylthio); C2(Methylthio)	0	1829219396	0	6.156e-07		3.39932e-07	2	1116.42	-7.25749	34.2377	0
	High	VPQVSTPTLVEVSR	22	1	1	P02768		0	4.40887e+09	0	5.906e-07		3.53087e-05	2	1511.84	-0.100761	39.2044	0
	High	YLYEIAR	25	1	1	P02768		0	870015360	0	1.28e-06		0.000370241	2	927.493	-0.532381	38.636	0
	High	YIcENQDSISSK	5	1	1	P02768	C3(Methylthio)	0	0	0.004	0.04477		0.0188464	2	1432.61	0.67585	32.8416	0
P60709	Actin, cytoplasmic 1 OS=Homo sapiens OX=9606 GN=ACTB PE=1 SV=1 - [ACTB_HUMAN]	956.416	38.93	1	11	11	70	1.06279e+08	375	41.7097	5.47803	0.0426309
	A3	Sequence	# PSMs	# Proteins	# Protein Groups	Protein Group Accessions	Modifications	ΔCn	Area	q-Value	PEP		Exp Value	Charge	MH+ [Da]	ΔM [ppm]	RT [min]	# Missed Cleavages
	High	AGFAGDDAPR	4	1	1	P60709		0	8.50664e+07	0	5.906e-07		3.63584e-07	2	976.447	-0.938101	20.3501	0
	High	dDDIAALVVDNGSGMcK	4	1	1	P60709	N-Term(Acetyl); C16(Methylthio)	0	4.00093e+07	0	5.906e-07		8.26929e-07	2	1810.76	-1.43485	58.412	0
	High	dDDIAALVVDNGSGmcK	4	1	1	P60709	N-Term(Acetyl); M15(Oxidation); C16(Methylthio)	0	5.92072e+06	0	2.318e-07		1.88495e-06	2	1826.76	-0.77702	53.0911	0
	High	EITALAPSTMK	4	1	1	P60709		0	4.68471e+07	0	9.04e-07		0.000186574	2	1161.62	-1.04699	31.1954	0
	High	GYSFTTTAER	4	1	1	P60709		0	6.24405e+07	0	5.906e-07		0.000101258	2	1132.53	0.918653	27.1721	0
	High	VAPEEHPVLLTEAPLNPK	8	1	1	P60709		0	2.52083e+07	0	5.906e-07		0.000274181	2	1954.06	-0.375115	61.6867	0
	High	SYELPDGQVITIGNER	12	1	1	P60709		0	1.35157e+08	0	5.906e-07		0.000438047	2	1790.89	-2.84936	46.8014	0
	High	DSYVGDEAQSK	4	1	1	P60709		0	9.8613e+07	0	5.906e-07		0.000574121	2	1198.52	0.0877463	18.3582	0
	High	DLYANTVLSGGTTMYPGIADR	5	1	1	P60709		0	5.22355e+07	0	5.906e-07		0.00299412	2	2215.07	1.24159	59.0568	0
	High	DLYANTVLSGGTTmYPGIADR	3	1	1	P60709	M14(Oxidation)	0	5.18791e+06	0	5.906e-07		0.00379186	2	2231.07	0.229032	45.6133	0
	High	EITALAPSTmK	4	1	1	P60709	M10(Oxidation)	0	4.9997e+06	0	2.238e-05		0.00468518	2	1177.62	2.45601	24.5301	0
	High	HQGVMVGMGQK	2	1	1	P60709		0	7.10241e+06	0	5.906e-07		0.00313677	2	1171.57	-0.762457	20.5627	0
	High	HQGVMVGmGQK	4	1	1	P60709	M8(Oxidation)	0	3.12011e+06	0	1.682e-05		0.00393883	2	1187.57	-0.581933	16.3151	0
	High	QEYDESGPSIVHR	7	1	1	P60709		0	1.48624e+07	0	5.906e-07		0.0188833	2	1516.7	-1.22505	28.8436	0
	High	DLTDYLMK	1	1	1	P60709		0	1.84683e+07	0.005	0.05561		0.12283	2	998.487	0.268971	44.4162	0
P10809	60 kDa heat shock protein, mitochondrial OS=Homo sapiens OX=9606 GN=HSPD1 PE=1 SV=2 - [CH60_HUMAN]	840.688	48.34	1	18	18	49	1.79064e+07	573	61.0164	5.87158	0.0298417
	A3	Sequence	# PSMs	# Proteins	# Protein Groups	Protein Group Accessions	Modifications	ΔCn	Area	q-Value	PEP		Exp Value	Charge	MH+ [Da]	ΔM [ppm]	RT [min]	# Missed Cleavages
	High	cEFQDAYVLLSEK	4	1	1	P10809	C1(Methylthio)	0	2.90161e+06	0	2.02e-07		6.57794e-08	2	1590.72	2.17434	63.762	0
	High	TLNDELEIIEGMK	4	1	1	P10809		0	1.51556e+07	0	5.906e-07		3.38603e-07	2	1504.75	-1.88314	52.6697	0
	High	IQEIIEQLDVTTSEYEK	5	1	1	P10809		0	1.00895e+07	0	5.906e-07		8.68636e-07	2	2038.02	-0.648372	59.585	0
	High	VGLQVVAVK	4	1	1	P10809		0	1.37737e+06	0	5.906e-07		4.71453e-06	2	912.588	-0.107663	32.1846	0
	High	VTDALNATR	2	1	1	P10809		0	1.34849e+07	0	5.906e-07		4.03927e-05	2	960.511	0.551657	19.3213	0
	High	VGEVIVTK	2	1	1	P10809		0	8.61744e+06	0	1.404e-05		3.46252e-05	2	844.516	3.04879	21.2619	0
	High	GVMLAVDAVIAELK	1	1	1	P10809		0	670094	0	5.906e-07		0.000330724	2	1428.81	-1.02756	67.9142	0
	High	LSDGVAVLK	4	1	1	P10809		0	4.53313e+06	0	6.767e-06		0.000536871	2	901.536	1.24708	28.703	0
	High	TLNDELEIIEGmK	2	1	1	P10809	M12(Oxidation)	0	2.0489e+06	0	5.906e-07		0.00148181	2	1520.75	0.436905	46.2964	0
	High	ISSIQSIVPALEIANAHR	2	1	1	P10809		0	5.01735e+06	0	5.906e-07		0.00130318	3	1919.07	-0.611736	66.2218	0
	High	NAGVEGSLIVEK	4	1	1	P10809		0	2.68247e+06	0	2.901e-05		0.0178365	2	1215.66	0.699024	31.8759	0
	High	TVIIEQSWGSPK	3	1	1	P10809		0	6.3953e+06	0	2.768e-06		0.0239668	2	1344.72	-0.350758	36.7395	0
	High	TALLDAAGVASLLTTAEVVVTEIPKEEK	1	1	1	P10809		0	187957	0	1.738e-05		0.0367234	3	2868.58	0.428654	68.475	1
	High	cIPALDSLTPANEDQK	4	1	1	P10809	C1(Methylthio)	0	12267151	0	0.0005867		0.0863621	2	1760.82	-0.0970196	44.8709	0
	High	LVQDVANNTNEEAGDGTTTATVLAR	1	1	1	P10809		0	2.50786e+07	0	0.002199		0.493714	3	2560.25	-1.03329	32.4772	0
	High	EIGNIISDAMK	2	1	1	P10809		0	2.2496e+06	0	0.0004631		0.427978	2	1190.61	-1.17248	44.1476	0
	High	IMQSSSEVGYDAMAGDFVNMVEK	1	1	1	P10809		0	1.97327e+06	0	5.795e-05		0.291947	2	2508.11	-0.227711	56.0788	0
	High	DPGMGAMGGMGGGMGGGMF	2	1	1	P10809		0	1.25295e+06	0	0.0001568		0.158424	2	1674.62	0.0642694	53.9801	0
	High	ALMLQGVDLLADAVAVTMGPK	1	1	1	P10809		0	463704	0.003	0.01789		0.802022	2	2113.14	-0.464629	68.5604	0
P35579	Myosin-9 OS=Homo sapiens OX=9606 GN=MYH9 PE=1 SV=4 - [MYH9_HUMAN]	742.062	15.1	1	20	20	44	5.27117e+06	1960	226.392	5.60498	0.0267966
	A3	Sequence	# PSMs	# Proteins	# Protein Groups	Protein Group Accessions	Modifications	ΔCn	Area	q-Value	PEP		Exp Value	Charge	MH+ [Da]	ΔM [ppm]	RT [min]	# Missed Cleavages
	High	ELEDATETADAMNR	2	1	1	P35579		0	3.7585e+06	0	5.906e-07		1.04859e-07	2	1565.68	2.47639	26.0111	0
	High	TELEDTLDSTAAQQELR	2	1	1	P35579		0	2.23727e+06	0	5.906e-07		2.47896e-06	2	1919.92	1.47164	38.608	0
	High	DELADEIANSSGK	2	1	1	P35579		0	2.2106e+06	0	5.906e-07		4.08665e-06	2	1348.62	0.0734328	30.2901	0
	High	LQVELDNVTGLLSQSDSK	2	1	1	P35579		0	3.45925e+06	0	5.906e-07		3.26183e-05	2	1946.01	-0.200144	51.4732	0
	High	NTDQASMPDNTAAQK	2	1	1	P35579		0	5.64421e+06	0	5.906e-07		1.04823e-05	2	1591.7	-1.10104	18.0093	0
	High	LTEMETLQSQLMAEK	2	1	1	P35579		0	2.98684e+06	0	5.906e-07		0.000222261	2	1751.86	-0.194743	47.1132	0
	High	NTDQASmPDNTAAQK	3	1	1	P35579	M7(Oxidation)	0	555359	0	5.906e-07		9.38574e-05	2	1607.69	-2.63476	17.9687	0
	High	QLEEAEEEAQR	2	1	1	P35579		0	4.58875e+06	0	5.952e-06		0.000320767	2	1331.61	0.0286674	19.6746	0
	High	ANLQIDQINTDLNLER	2	1	1	P35579		0	4.81501e+06	0	5.906e-07		0.00152115	2	1869.97	0.347271	46.3568	0
	High	VEAQLQELQVK	2	1	1	P35579		0	1.15953e+06	0	6.154e-07		0.00195842	2	1284.72	-0.557175	32.5192	0
	High	IAQLEEQLDNETK	2	1	1	P35579		0	4.34879e+06	0	5.906e-07		0.0044206	2	1530.76	-0.934245	31.6595	0
	High	ELEDATETADAmNR	2	1	1	P35579	M12(Oxidation)	0	577309	0	5.906e-07		0.000956181	2	1581.67	-1.3569	20.3945	0
	High	DFSALESQLQDTQELLQEENR	3	1	1	P35579		0	3.67017e+06	0	5.906e-07		0.00483459	2	2493.17	-0.665987	57.1343	0
	High	MQQNIQELEEQLEEEESAR	2	1	1	P35579		0	1.56817e+06	0	5.906e-07		0.00427879	2	2333.05	-1.49561	49.2392	0
	High	NFINNPLAQADWAAK	2	1	1	P35579		0	3.84198e+06	0	8.764e-07		0.00767128	2	1672.84	0.0146935	50.7625	0
	High	ALEQQVEEMK	2	1	1	P35579		0	2.98553e+06	0	3.079e-06		0.0165301	2	1204.59	0.857958	27.9613	0
	High	IIGLDQVAGMSETALPGAFK	3	1	1	P35579		0	2.15002e+06	0	5.906e-07		0.0521109	2	2018.06	0.655684	63.8315	0
	High	IAQLEEELEEEQGNTELINDR	2	1	1	P35579		0	1.06276e+06	0	8.872e-05		0.0566826	2	2472.17	0.445351	46.1495	0
	High	IAEFTTNLTEEEEK	2	1	1	P35579		0	5.35428e+06	0	8.74e-06		0.15779	2	1653.79	0.656265	35.8967	0
	High	EDQSILcTGESGAGK	1	1	1	P35579	C7(Methylthio)	0	2.17029e+06	0	1.885e-05		0.205288	2	1540.66	-1.47262	31.7643	0
	High	ALEEAMEQK	1	1	1	P35579		0	1.78647e+06	0.003	0.01789		0.0528675	2	1048.5	-0.143984	20.8408	0
	High	SGFEPASLK	1	1	1	P35579		0	558572	0.003	0.01789		0.225643	2	935.481	-2.28071	28.4333	0
P11021	Endoplasmic reticulum chaperone BiP OS=Homo sapiens OX=9606 GN=HSPA5 PE=1 SV=2 - [BIP_HUMAN]	492.188	25.54	1	10	12	32	2.12977e+07	654	72.2884	5.16064	0.0194884
	A3	Sequence	# PSMs	# Proteins	# Protein Groups	Protein Group Accessions	Modifications	ΔCn	Area	q-Value	PEP		Exp Value	Charge	MH+ [Da]	ΔM [ppm]	RT [min]	# Missed Cleavages
	High	SQIFSTASDNQPTVTIK	2	1	1	P11021		0	2.04851e+07	0	5.906e-07		5.29815e-06	2	1836.93	-1.244	36.2085	0
	High	IEIESFYEGEDFSETLTR	4	1	1	P11021		0	5.39222e+06	0	1.707e-08		7.57273e-06	2	2164.99	-1.54928	61.707	0
	High	NQLTSNPENTVFDAK	4	1	1	P11021		0	2.03498e+07	0	5.906e-07		1.76897e-05	2	1677.81	0.647427	33.6916	0
	High	IINEPTAAAIAYGLDK	6	2	2	P11021;P11142		0	2.30582e+07	0	5.906e-07		2.12369e-05	2	1659.9	0.600359	45.758	0
	High	VEIIANDQGNR	4	3	3	P0DMV8;P11021;P11142		0	1.91689e+07	0	5.906e-07		0.000255771	2	1228.63	0.693903	21.7792	0
	High	FEELNMDLFR	2	1	1	P11021		0	1.29024e+06	0	5.906e-07		0.000192052	2	1313.62	-0.160629	53.4477	0
	High	TFAPEEISAMVLTK	2	1	1	P11021		0	7.28705e+06	0	5.906e-07		0.00168936	2	1536.8	-0.312611	53.4451	0
	High	LYGSAGPPPTGEEDTAEKDEL	3	1	1	P11021		0	1.12346e+07	0	5.906e-07		0.00121262	2	2176	2.48958	33.8339	1
	High	ITITNDQNR	1	1	1	P11021		0	1.20464e+07	0	3.897e-06		0.0127742	2	1074.55	-0.427131	18.9741	0
	High	VYEGERPLTK	2	1	1	P11021		0	2.49959e+06	0	0.0002055		0.0414177	2	1191.64	-0.28456	19.2177	0
	High	DAGTIAGLNVMR	1	1	1	P11021		0	0	0	3.067e-05		0.20918	2	1217.64	5.93424	39.1225	0
	High	ITPSYVAFTPEGER	1	1	1	P11021		0	9.0099e+06	0.003	0.01789		0.558819	2	1566.78	-1.99793	39.6981	0
P14618	Pyruvate kinase PKM OS=Homo sapiens OX=9606 GN=PKM PE=1 SV=4 - [KPYM_HUMAN]	460.233	30.13	1	12	12	26	1.21862e+07	531	57.9	7.84033	0.0158343
	A3	Sequence	# PSMs	# Proteins	# Protein Groups	Protein Group Accessions	Modifications	ΔCn	Area	q-Value	PEP		Exp Value	Charge	MH+ [Da]	ΔM [ppm]	RT [min]	# Missed Cleavages
	High	FDEILEASDGIMVAR	4	1	1	P14618		0	4.49397e+06	0	5.906e-07		2.24686e-07	2	1665.81	-0.950285	49.1264	0
	High	IYVDDGLISLQVK	2	1	1	P14618		0	8.91622e+06	0	1.194e-07		1.45816e-06	2	1462.81	-0.749779	49.941	0
	High	GVNLPGAAVDLPAVSEK	2	1	1	P14618		0	1.2875e+07	0	5.906e-07		3.75119e-06	2	1636.89	0.739164	43.9583	0
	High	DPVQEAWAEDVDLR	2	1	1	P14618		0	1.03384e+07	0	5.906e-07		8.60994e-06	2	1642.77	-0.465172	46.8974	0
	High	GADFLVTEVENGGSLGSK	3	1	1	P14618		0	1.14111e+07	0	5.906e-07		0.00456385	2	1779.88	0.544658	47.0369	0
	High	NTGIIcTIGPASR	2	1	1	P14618	C6(Methylthio)	0	4.10929e+06	0	5.906e-07		0.00569559	2	1348.67	0.421324	43.9712	0
	High	GSGTAEVELK	2	1	1	P14618		0	5.8694e+06	0	0.000591		0.0270274	2	990.511	1.07803	20.5747	0
	High	cDENILWLDYK	1	1	1	P14618	C1(Methylthio)	0	2.95619e+06	0	0.01789		0.0275576	2	1457.64	-0.609405	53.627	0
	High	LAPITSDPTEATAVGAVEASFK	4	1	1	P14618		0	1.22726e+07	0	5.988e-07		0.170957	2	2175.11	-1.50687	60.4957	0
	High	ITLDNAYmEK	1	1	1	P14618	M8(Oxidation)	0	0	0	5.39e-05		0.177751	2	1213.58	0.289892	27.9832	0
	High	GDYPLEAVR	1	1	1	P14618		0	3.11419e+06	0.001	0.01789		0.260558	2	1019.52	-0.607203	30.8396	0
	High	ASDVHEVR	2	1	1	P14618		0	194572	0.003	0.0182		0.213455	2	912.454	0.407309	14.4341	0
P49327	Fatty acid synthase OS=Homo sapiens OX=9606 GN=FASN PE=1 SV=3 - [FAS_HUMAN]	457.117	10.67	1	18	18	31	5.36745e+06	2511	273.254	6.44287	0.0188794
	A3	Sequence	# PSMs	# Proteins	# Protein Groups	Protein Group Accessions	Modifications	ΔCn	Area	q-Value	PEP		Exp Value	Charge	MH+ [Da]	ΔM [ppm]	RT [min]	# Missed Cleavages
	High	QGVQVQVSTSNISSLEGAR	2	1	1	P49327		0	1.94318e+06	0	5.906e-07		1.68934e-05	2	1960.01	-0.832242	38.4853	0
	High	mEEVVIAGMSGK	2	1	1	P49327	N-Term(Acetyl)	0	2.89047e+06	0	5.906e-07		9.11121e-05	2	1292.62	-0.449056	54.3342	0
	High	AcLDTAVENMPSLK	2	1	1	P49327	C2(Methylthio)	0	3328462	0	5.906e-07		0.000146667	2	1537.71	-0.160125	45.7691	0
	High	GVDLVLNSLAEEK	2	1	1	P49327		0	2.87094e+06	0	5.906e-07		0.000350216	2	1386.75	1.26474	46.2851	0
	High	VGDPQELNGITR	2	1	1	P49327		0	4.43732e+06	0	5.906e-07		0.00224339	2	1298.67	-0.0954027	27.664	0
	High	TGGAYGEDLGADYNLSQVcDGK	2	1	1	P49327	C19(Methylthio)	0	1.69355e+06	0	5.906e-07		0.000947225	2	2278.96	-0.81586	50.843	0
	High	EQGVTFPSGDIQEQLIR	2	1	1	P49327		0	6.13798e+06	0	5.906e-07		0.0034822	2	1916.97	-2.01697	46.812	0
	High	LPEDPLLSGLLDSPALK	1	1	1	P49327		0	1.11623e+06	0	5.906e-07		0.0022009	2	1777.99	-1.9307	66.5952	0
	High	LQVVDQPLPVR	2	1	1	P49327		0	3.43661e+06	0	0.0001145		0.00190774	2	1263.73	-8.22668	35.9613	0
	High	EDGLAQQQTQLNLR	3	1	1	P49327		0	5.52705e+06	0	6.653e-07		0.00506214	2	1613.82	-2.85882	31.058	0
	High	VYATILNAGTNTDGFK	1	1	1	P49327		0	4.08839e+06	0	1.313e-06		0.0108646	2	1684.85	0.453865	41.4786	0
	High	GNAGQSNYGFANSAMER	2	1	1	P49327		0	2.56696e+06	0	5.906e-07		0.00462638	2	1773.76	-2.45913	30.7841	0
	High	VYQWDDPDPR	2	1	1	P49327		0	1.01731e+06	0	0.0119		0.0103919	2	1290.58	0.66789	32.9953	0
	High	SLLVNPEGPTLMR	2	1	1	P49327		0	1.65474e+06	0	1.879e-05		0.0290827	2	1426.77	-0.0539009	44.0983	0
	High	MVVPGLDGAQIPR	1	1	1	P49327		0	2.06325e+06	0	2.048e-05		0.116842	2	1352.74	0.0532269	44.2932	0
	High	VLQGDLVMNVYR	1	1	1	P49327		0	1.99774e+06	0	1.166e-06		0.255211	2	1406.74	-2.40834	43.9078	0
	High	SLYQSAGVAPESFEYIEAHGTGTK	1	1	1	P49327		0	3.34393e+06	0	3.343e-05		0.636762	3	2542.21	1.67219	45.3349	0
	High	LSIPTYGLQcTR	1	1	1	P49327	C10(Methylthio)	0	1.31724e+06	0.008	0.1249		0.852268	2	1397.69	1.54604	48.6768	0
P07355	Annexin A2 OS=Homo sapiens OX=9606 GN=ANXA2 PE=1 SV=2 - [ANXA2_HUMAN]	456.5	34.81	1	10	10	28	1.9952e+07	339	38.5798	7.75244	0.0170524
	A3	Sequence	# PSMs	# Proteins	# Protein Groups	Protein Group Accessions	Modifications	ΔCn	Area	q-Value	PEP		Exp Value	Charge	MH+ [Da]	ΔM [ppm]	RT [min]	# Missed Cleavages
	High	GVDEVTIVNILTNR	2	1	1	P07355		0	4.64037e+06	0	5.906e-07		2.32847e-05	2	1542.85	2.22126	65.0108	0
	High	QDIAFAYQR	2	1	1	P07355		0	4.6929e+06	0	5.906e-07		2.43343e-05	2	1111.55	0.463465	31.7559	0
	High	TNQELQEINR	4	1	1	P07355		0	1.56174e+07	0	6.64e-07		5.91121e-05	2	1244.62	-0.317452	22.4156	0
	High	SYSPYDMLESIR	4	1	1	P07355		0	1.55792e+07	0	5.906e-07		7.06331e-05	2	1460.68	1.92468	52.4311	0
	High	DIISDTSGDFR	2	1	1	P07355		0	7.72157e+06	0	5.906e-07		0.00024116	2	1225.57	-1.1574	36.1065	0
	High	DALNIETAIK	3	1	1	P07355		0	7.03838e+06	0	1.816e-06		0.000888897	2	1087.6	0.216692	37.3694	0
	High	AEDGSVIDYELIDQDAR	2	1	1	P07355		0	1.12398e+07	0	5.906e-07		0.00306707	2	1908.88	-0.565874	44.1261	0
	High	TPAQYDASELK	6	1	1	P07355		0	2.86594e+07	0	1.958e-05		0.00884059	2	1222.6	3.0682	23.7634	0
	High	WISIMTER	2	1	1	P07355		0	796064	0	0.002848		0.203144	2	1035.53	-0.126473	44.8235	0
	High	GLGTDEDSLIEIIcSR	1	1	1	P07355	C14(Methylthio)	0	1.46615e+06	0	0.003969		0.346471	2	1766.82	-2.97011	67.7288	0
P07437	Tubulin beta chain OS=Homo sapiens OX=9606 GN=TUBB PE=1 SV=2 - [TBB5_HUMAN]	429.329	30.18	1	3	11	30	2.50578e+07	444	49.639	4.89404	0.0182704
	A3	Sequence	# PSMs	# Proteins	# Protein Groups	Protein Group Accessions	Modifications	ΔCn	Area	q-Value	PEP		Exp Value	Charge	MH+ [Da]	ΔM [ppm]	RT [min]	# Missed Cleavages
	High	EVDEQMLNVQNK	2	2	2	P68371;P07437		0	3.50025e+07	0	5.906e-07		7.10215e-06	2	1446.69	-0.768154	28.3918	0
	High	ISEQFTAMFR	6	2	2	P68371;P07437		0	7.5198e+06	0	5.906e-07		1.97699e-05	2	1229.6	-0.153847	46.628	0
	High	GHYTEGAELVDSVLDVVR	2	2	2	P68371;P07437		0	2.49861e+06	0	5.906e-07		0.000986703	2	1958.98	-1.07065	67.6848	0
	High	ISVYYNEATGGK	3	1	1	P07437		0	1.48651e+07	0	5.906e-07		0.000770903	2	1301.64	1.04184	28.4629	0
	High	EVDEQmLNVQNK	2	2	2	P68371;P07437	M6(Oxidation)	0	3.57445e+06	0	5.906e-07		0.00119401	2	1462.69	0.964147	21.5985	0
	High	AILVDLEPGTMDSVR	4	1	1	P07437		0	1.04225e+07	0	5.906e-07		0.00381296	2	1615.84	-0.210629	47.5026	0
	High	LAVNMVPFPR	3	2	2	P68371;P07437		0	2.97938e+06	0	9.149e-05		0.00837731	2	1143.63	-1.54363	46.9994	0
	High	ALTVPELTQQVFDAK	3	1	1	P07437		0	1.50089e+07	0	5.906e-07		0.0265626	2	1659.89	-0.355674	52.8434	0
	High	NSSYFVEWIPNNVK	2	2	2	P68371;P07437		0	2.51622e+07	0	2.569e-05		0.0295367	2	1696.83	0.10383	53.0836	0
	High	TAVcDIPPR	1	2	2	P68371;P07437	C4(Methylthio)	0	0	0.001	0.01789		0.0703751	2	1017.49	1.43082	35.4794	0
	High	YLTVAAVFR	1	2	2	P68371;P07437		0	739712	0.003	0.01789		0.138309	2	1039.59	-1.38774	49.0803	0
	High	FPGQLNADLR	1	2	2	P68371;P07437		0	9.91791e+06	0.008	0.1186		0.0173269	2	1130.59	-1.04148	34.6839	0
Q9BQE3	Tubulin alpha-1C chain OS=Homo sapiens OX=9606 GN=TUBA1C PE=1 SV=1 - [TBA1C_HUMAN]	427.17	29.4	2	9	9	26	3.87965e+07	449	49.8635	5.09717	0.0158343
	A3	Sequence	# PSMs	# Proteins	# Protein Groups	Protein Group Accessions	Modifications	ΔCn	Area	q-Value	PEP		Exp Value	Charge	MH+ [Da]	ΔM [ppm]	RT [min]	# Missed Cleavages
	High	EIIDLVLDR	4	2	1	Q9BQE3		0	3.70014e+06	0	5.906e-07		6.42968e-05	2	1085.62	0.115654	63.3869	0
	High	TIGGGDDSFNTFFSETGAGK	5	2	1	Q9BQE3		0	3.48481e+07	0	5.906e-07		4.26132e-05	2	2007.89	-1.2903	59.7378	0
	High	AVFVDLEPTVIDEVR	5	2	1	Q9BQE3		0	2.91337e+07	0	5.906e-07		0.000651765	2	1701.9	-0.681951	53.695	0
	High	DVNAAIATIK	2	2	1	Q9BQE3		0	6.45048e+06	0	7.633e-07		0.00267522	2	1015.58	-2.10015	30.9695	0
	High	IHFPLATYAPVISAEK	2	2	1	Q9BQE3		0	1.73217e+06	0	9.132e-07		0.00737571	2	1756.96	-0.831953	66.8613	0
	High	EDAANNYAR	2	2	1	Q9BQE3		0	424701	0	2.424e-05		0.0118926	2	1023.45	-1.81753	16.6434	0
	High	FDGALNVDLTEFQTNLVPYPR	2	2	1	Q9BQE3		0	2.64875e+06	0	3.012e-06		0.106169	2	2409.21	-0.125248	64.8205	0
	High	LISQIVSSITASLR	1	2	1	Q9BQE3		0	2.04428e+06	0	0.004006		0.0567751	2	1487.88	-0.104431	67.8479	0
	High	VGINYQPPTVVPGGDLAK	3	2	1	Q9BQE3		0	5.24077e+07	0	9.18e-07		0.0892299	2	1824.98	-0.730331	42.7062	0
P68371	Tubulin beta-4B chain OS=Homo sapiens OX=9606 GN=TUBB4B PE=1 SV=1 - [TBB4B_HUMAN]	403.673	30.11	1	3	11	30	2.79389e+07	445	49.799	4.89404	0.0182704
	A3	Sequence	# PSMs	# Proteins	# Protein Groups	Protein Group Accessions	Modifications	ΔCn	Area	q-Value	PEP		Exp Value	Charge	MH+ [Da]	ΔM [ppm]	RT [min]	# Missed Cleavages
	High	EVDEQMLNVQNK	2	2	2	P68371;P07437		0	3.50025e+07	0	5.906e-07		7.10215e-06	2	1446.69	-0.768154	28.3918	0
	High	ISEQFTAMFR	6	2	2	P68371;P07437		0	7.5198e+06	0	5.906e-07		1.97699e-05	2	1229.6	-0.153847	46.628	0
	High	GHYTEGAELVDSVLDVVR	2	2	2	P68371;P07437		0	2.49861e+06	0	5.906e-07		0.000986703	2	1958.98	-1.07065	67.6848	0
	High	EVDEQmLNVQNK	2	2	2	P68371;P07437	M6(Oxidation)	0	3.57445e+06	0	5.906e-07		0.00119401	2	1462.69	0.964147	21.5985	0
	High	INVYYNEATGGK	2	1	1	P68371		0	2.36521e+07	0	5.906e-07		0.00138995	2	1328.65	0.442509	28.696	0
	High	LAVNMVPFPR	3	2	2	P68371;P07437		0	2.97938e+06	0	9.149e-05		0.00837731	2	1143.63	-1.54363	46.9994	0
	High	AVLVDLEPGTMDSVR	5	1	1	P68371		0	2.03549e+07	0	0.01789		0.0164106	2	1601.82	-1.5686	44.6753	0
	High	NSSYFVEWIPNNVK	2	2	2	P68371;P07437		0	2.51622e+07	0	2.569e-05		0.0295367	2	1696.83	0.10383	53.0836	0
	High	ALTVPELTQQMFDAK	3	1	1	P68371		0	1.23924e+07	0	1.414e-06		0.036056	2	1691.87	1.93973	63.227	0
	High	TAVcDIPPR	1	2	2	P68371;P07437	C4(Methylthio)	0	0	0.001	0.01789		0.0703751	2	1017.49	1.43082	35.4794	0
	High	YLTVAAVFR	1	2	2	P68371;P07437		0	739712	0.003	0.01789		0.138309	2	1039.59	-1.38774	49.0803	0
	High	FPGQLNADLR	1	2	2	P68371;P07437		0	9.91791e+06	0.008	0.1186		0.0173269	2	1130.59	-1.04148	34.6839	0
P05787	Keratin, type II cytoskeletal 8 OS=Homo sapiens OX=9606 GN=KRT8 PE=1 SV=7 - [K2C8_HUMAN]	400.253	35.61	1	14	15	31	2.43209e+07	483	53.6711	5.59229	-
	A3	Sequence	# PSMs	# Proteins	# Protein Groups	Protein Group Accessions	Modifications	ΔCn	Area	q-Value	PEP		Exp Value	Charge	MH+ [Da]	ΔM [ppm]	RT [min]	# Missed Cleavages
	High	LEAELGNMQGLVEDFK	4	1	1	P05787		0	7.45206e+06	0	5.906e-07		4.48459e-05	2	1792.88	-0.528845	54.5955	0
	High	SLDMDSIIAEVK	2	1	1	P05787		0	1.01711e+07	0	5.906e-07		7.53643e-05	2	1320.67	0.413001	51.7011	0
	High	EYQELMNVK	2	1	1	P05787		0	3.97989e+06	0	0.006635		0.00154354	2	1153.55	-0.84446	30.9119	0
	High	AQYEDIANR	2	1	1	P05787		0	7.12705e+06	0	5.906e-07		0.00184077	2	1079.51	0.332733	21.858	0
	High	LLEGEESR	2	3	3	P08670;P05787;P08729		0	7.3657e+06	0	0.00115		0.00388396	2	932.469	0.490455	18.4357	0
	High	AEAESMYQIK	2	1	1	P05787		0	5.7654e+06	0	6.887e-07		0.00442592	2	1169.55	-0.246815	27.3168	0
	High	AEAESmYQIK	2	1	1	P05787	M6(Oxidation)	0	920814	0	8.931e-07		0.00315169	2	1185.54	-1.30853	21.6838	0
	High	LVSESSDVLPK	2	1	1	P05787		0	9.20256e+06	0	8.317e-07		0.0116007	2	1173.64	0.06541	27.5444	0
	High	LEGLTDEINFLR	3	1	1	P05787		0	7.95487e+06	0	1.511e-05		0.0111404	2	1419.75	0.916927	53.2305	0
	High	LQAEIEGLK	2	1	1	P05787		0	4.99313e+06	0	8.951e-05		0.00820649	2	1000.57	0.222091	30.1886	0
	High	DVDEAYMNK	1	1	1	P05787		0	2.25765e+06	0	0.01006		0.0102672	2	1084.46	2.35842	22.2705	0
	High	TEMENEFVLIK	2	1	1	P05787		0	6.95046e+06	0	1.349e-05		0.0306344	2	1352.68	0.618428	45.6858	0
	High	ASLEAAIADAEQR	1	1	1	P05787		0	8.27303e+06	0	0.004308		0.108777	2	1344.67	-0.634469	40.799	0
	High	ELQSQISDTSVVLSMDNSR	1	1	1	P05787		0	7.35866e+06	0	1.186e-05		0.180154	2	2109.01	-1.24693	42.9872	0
	High	SNmDNMFESYINNLR	1	1	1	P05787	M3(Oxidation)	0	569962	0	0.001749		0.236702	2	1863.8	-0.0600619	53.8447	0
	High	QLETLGQEK	2	1	1	P05787		0	5.35891e+07	0.003	0.01789		0.0295708	2	1045.55	1.47422	21.1917	0
P04406	Glyceraldehyde-3-phosphate dehydrogenase OS=Homo sapiens OX=9606 GN=GAPDH PE=1 SV=3 - [G3P_HUMAN]	391.455	28.06	1	6	6	21	1.878e+07	335	36.0304	8.45557	0.0127893
	A3	Sequence	# PSMs	# Proteins	# Protein Groups	Protein Group Accessions	Modifications	ΔCn	Area	q-Value	PEP		Exp Value	Charge	MH+ [Da]	ΔM [ppm]	RT [min]	# Missed Cleavages
	High	LVINGNPITIFQER	4	1	1	P04406		0	1.11171e+07	0	5.906e-07		2.84071e-06	2	1613.9	1.06342	63.7481	0
	High	LISWYDNEFGYSNR	4	1	1	P04406		0	2.22297e+07	0	5.906e-07		3.51101e-06	2	1763.8	0.342904	61.9079	0
	High	VPTANVSVVDLTcR	6	1	1	P04406	C13(Methylthio)	0	2.29933e+07	0	5.906e-07		1.24979e-05	2	1519.76	-0.0753961	46.7209	0
	High	AGAHLQGGAK	3	1	1	P04406		0	310273	0	6.905e-07		0.000279356	2	909.49	-0.315091	13.4129	0
	High	WGDAGAEYVVESTGVFTTMEK	3	1	1	P04406		0	4.09026e+06	0	5.906e-07		0.00492045	2	2277.04	-0.629154	63.4926	0
	High	VIISAPSADAPMFVMGVNHEK	1	1	1	P04406		0	8.12071e+06	0	8.457e-07		0.146054	3	2213.11	-0.791255	65.118	0
P04083	Annexin A1 OS=Homo sapiens OX=9606 GN=ANXA1 PE=1 SV=2 - [ANXA1_HUMAN]	328.692	26.01	1	7	7	15	1.2401e+07	346	38.69	7.02002	0.0091352
	A3	Sequence	# PSMs	# Proteins	# Protein Groups	Protein Group Accessions	Modifications	ΔCn	Area	q-Value	PEP		Exp Value	Charge	MH+ [Da]	ΔM [ppm]	RT [min]	# Missed Cleavages
	High	GVDEATIIDILTK	2	1	1	P04083		0	2.2565e+06	0	5.906e-07		1.78738e-07	2	1387.77	0.110036	65.599	0
	High	SEDFGVNEDLADSDAR	2	1	1	P04083		0	1.43982e+07	0	5.906e-07		8.46369e-06	2	1739.74	1.79553	34.3956	0
	High	DITSDTSGDFR	2	1	1	P04083		0	5.15219e+06	0	5.906e-07		0.000125271	2	1213.53	0.250149	26.6183	0
	High	TPAQFDADELR	4	1	1	P04083		0	1.09242e+07	0	5.906e-07		0.000613962	2	1262.6	0.404616	31.3727	0
	High	QAWFIENEEQEYVQTVK	1	1	1	P04083		0	3.98927e+06	0	5.906e-07		0.00199074	2	2141.02	-0.707074	50.7554	0
	High	aMVSEFLK	2	1	1	P04083	N-Term(Acetyl)	0	401023	0	0.0007368		0.0117957	2	966.497	0.286018	55.9575	0
	High	GTDVNVFNTILTTR	2	1	1	P04083		0	1.18807e+07	0	3.322e-05		0.0570796	2	1550.82	-0.742571	52.7503	0
P11142	Heat shock cognate 71 kDa protein OS=Homo sapiens OX=9606 GN=HSPA8 PE=1 SV=1 - [HSP7C_HUMAN]	319.207	20.9	1	7	10	26	1.93465e+07	646	70.8542	5.51611	0.0158343
	A3	Sequence	# PSMs	# Proteins	# Protein Groups	Protein Group Accessions	Modifications	ΔCn	Area	q-Value	PEP		Exp Value	Charge	MH+ [Da]	ΔM [ppm]	RT [min]	# Missed Cleavages
	High	IINEPTAAAIAYGLDK	6	2	2	P11021;P11142		0	2.30582e+07	0	5.906e-07		2.12369e-05	2	1659.9	0.600359	45.758	0
	High	VEIIANDQGNR	4	3	3	P0DMV8;P11021;P11142		0	1.91689e+07	0	5.906e-07		0.000255771	2	1228.63	0.693903	21.7792	0
	High	FEELNADLFR	2	1	1	P11142		0	3.85929e+06	0	6.633e-07		0.000335026	2	1253.62	0.483016	47.4467	0
	High	NQVAMNPTNTVFDAK	2	1	1	P11142		0	1.12764e+07	0	1.717e-06		0.00424525	2	1649.79	-1.28676	35.204	0
	High	NQTAEKEEFEHQQK	2	1	1	P11142		0	164342	0	5.906e-07		0.00566283	2	1745.81	-1.45332	16.5206	1
	High	SFYPEEVSSMVLTK	3	1	1	P11142		0	6.6438e+06	0	5.906e-07		0.00986458	2	1616.79	0.493848	49.8334	0
	High	NQVAmNPTNTVFDAK	2	1	1	P11142	M5(Oxidation)	0	3.05143e+06	0	5.906e-07		0.0147924	2	1665.79	0.312592	29.6191	0
	High	TVTNAVVTVPAYFNDSQR	1	1	1	P11142		0	5.30507e+06	0	2.4e-06		0.161212	2	1982	-0.370025	44.3307	0
	High	VcNPIITK	1	1	1	P11142	C2(Methylthio)	0	712638	0.003	0.01789		0.0153794	2	933.49	0.533057	30.6708	0
	High	TTPSYVAFTDTER	2	2	2	P0DMV8;P11142		0	1.58125e+07	0.003	0.01789		0.133427	2	1487.7	-0.554042	35.6599	0
	High	STAGDTHLGGEDFDNR	1	1	1	P11142		0	1.6386e+06	0.003	0.01789		0.249721	2	1691.73	2.29262	24.0317	0
P31947	14-3-3 protein sigma OS=Homo sapiens OX=9606 GN=SFN PE=1 SV=1 - [1433S_HUMAN]	317.778	22.18	1	4	5	14	7.76762e+06	248	27.7567	4.7417	0.00852619
	A3	Sequence	# PSMs	# Proteins	# Protein Groups	Protein Group Accessions	Modifications	ΔCn	Area	q-Value	PEP		Exp Value	Charge	MH+ [Da]	ΔM [ppm]	RT [min]	# Missed Cleavages
	High	SNEEGSEEKGPEVR	5	1	1	P31947		0	8.92092e+06	0	5.906e-07		6.47215e-07	2	1546.7	-0.398272	16.2586	1
	High	YLAEVATGDDK	3	1	1	P31947		0	6.65343e+06	0	5.906e-07		3.32524e-05	2	1181.57	0.841513	23.5379	0
	High	SAYQEAMDISK	2	1	1	P31947		0	7.72851e+06	0	5.906e-07		7.08367e-05	2	1242.57	-0.938165	30.205	0
	High	DSTLIMQLLR	2	5	5	P31946;P62258;P31947;P27348;P63104		0	3.39388e+06	0	5.906e-07		0.00111586	2	1189.66	-0.0378506	66.06	0
	High	GEELScEER	2	1	1	P31947	C6(Methylthio)	0	3.04807e+06	0	1.277e-06		0.00031782	2	1097.42	0.697857	25.5552	0
P02545	Prelamin-A/C OS=Homo sapiens OX=9606 GN=LMNA PE=1 SV=1 - [LMNA_HUMAN]	293.309	14.76	1	7	7	12	6.27924e+06	664	74.0947	7.02002	0.00730816
	A3	Sequence	# PSMs	# Proteins	# Protein Groups	Protein Group Accessions	Modifications	ΔCn	Area	q-Value	PEP		Exp Value	Charge	MH+ [Da]	ΔM [ppm]	RT [min]	# Missed Cleavages
	High	ASASGSGAQVGGPISSGSSASSVTVTR	2	1	1	P02545		0	595440	0	5.906e-07		9.64565e-06	2	2365.16	-0.875747	27.8316	0
	High	VAVEEVDEEGK	2	1	1	P02545		0	6.72518e+06	0	5.906e-07		6.67179e-06	2	1203.58	3.05175	20.8074	0
	High	EDLQELNDR	2	1	1	P02545		0	1.80699e+06	0	1.079e-06		0.000539997	2	1131.53	-1.90098	23.6002	0
	High	AAYEAELGDAR	2	1	1	P02545		0	2.09406e+06	0	5.906e-07		0.0010676	2	1165.55	0.8878	25.9321	0
	High	MQQQLDEYQELLDIK	2	1	1	P02545		0	5.72939e+06	0	5.906e-07		0.00181841	2	1893.92	-1.10319	52.0105	0
	High	SGAQASSTPLSPTR	1	1	1	P02545		0	6.38314e+06	0	6.151e-07		0.00344305	2	1359.69	-0.369707	19.9851	0
	High	AQHEDQVEQYK	1	1	1	P02545		0	1.12313e+06	0	0.0001858		0.220044	2	1374.63	-2.13543	17.6238	0
P04075	Fructose-bisphosphate aldolase A OS=Homo sapiens OX=9606 GN=ALDOA PE=1 SV=2 - [ALDOA_HUMAN]	289.222	29.67	1	8	8	18	9.69501e+06	364	39.3953	8.08936	0.0109622
	A3	Sequence	# PSMs	# Proteins	# Protein Groups	Protein Group Accessions	Modifications	ΔCn	Area	q-Value	PEP		Exp Value	Charge	MH+ [Da]	ΔM [ppm]	RT [min]	# Missed Cleavages
	High	GVVPLAGTNGETTTQGLDGLSER	2	1	1	P04075		0	4.63281e+06	0	5.906e-07		1.50562e-06	2	2272.14	-2.58414	41.3121	0
	High	GILAADESTGSIAK	4	1	1	P04075		0	1.39091e+07	0	5.906e-07		2.05476e-05	2	1332.7	0.822731	29.1929	0
	High	YTPSGQAGAAASESLFVSNHAY	3	1	1	P04075		0	5.52422e+06	0	4.868e-07		0.000165884	2	2228.02	-0.585173	43.0457	0
	High	AAQEEYVK	1	1	1	P04075		0	646410	0	0.01789		0.000693452	2	937.463	0.130974	17.9381	0
	High	ALANSLAcQGK	2	1	1	P04075	C8(Methylthio)	0	6.27632e+06	0	4.669e-06		0.00165073	2	1121.54	0.548443	28.9121	0
	High	QLLLTADDR	2	1	1	P04075		0	2.71339e+06	0	4.376e-05		0.0156805	2	1044.57	-0.393021	30.1407	0
	High	LQSIGTENTEENR	2	1	1	P04075		0	8.89964e+06	0.003	0.01815		0.0864616	2	1490.71	-0.343528	20.6445	0
	High	ELSDIAHR	2	1	1	P04075		0	1.94872e+06	0.004	0.04333		0.107391	2	940.485	0.73139	19.2795	0
P0DMV8	Heat shock 70 kDa protein 1A OS=Homo sapiens OX=9606 GN=HSPA1A PE=1 SV=1 - [HS71A_HUMAN]	288.365	17.16	1	7	9	20	1.53953e+07	641	70.009	5.65576	0.0121803
	A3	Sequence	# PSMs	# Proteins	# Protein Groups	Protein Group Accessions	Modifications	ΔCn	Area	q-Value	PEP		Exp Value	Charge	MH+ [Da]	ΔM [ppm]	RT [min]	# Missed Cleavages
	High	IINEPTAAAIAYGLDR	2	1	1	P0DMV8		0	5.73822e+06	0	5.906e-07		3.50237e-05	2	1687.9	0.128933	47.1085	0
	High	DAGVIAGLNVLR	2	1	1	P0DMV8		0	2.40915e+06	0	5.906e-07		4.04454e-05	2	1197.69	-0.676161	47.7281	0
	High	VEIIANDQGNR	4	3	3	P0DMV8;P11021;P11142		0	1.91689e+07	0	5.906e-07		0.000255771	2	1228.63	0.693903	21.7792	0
	High	YKAEDEVQR	2	1	1	P0DMV8		0	1.87181e+06	0	0.000113		0.0028695	2	1137.55	-2.47419	16.8521	1
	High	NQVALNPQNTVFDAK	2	1	1	P0DMV8		0	1.12045e+07	0	5.726e-05		0.00843592	2	1658.85	-1.8109	36.5227	0
	High	FGDPVVQSDMK	2	1	1	P0DMV8		0	4.19441e+06	0	6.071e-05		0.0296486	2	1222.58	-0.302152	29.6765	0
	High	SAVEDEGLK	2	1	1	P0DMV8		0	4.99079e+06	0	0.002688		0.0374221	2	947.469	0.637729	18.9178	0
	High	AFYPEEISSMVLTK	2	1	1	P0DMV8		0	5.33398e+06	0	0.001206		0.287251	2	1614.81	0.123884	53.9576	0
	High	TTPSYVAFTDTER	2	2	2	P0DMV8;P11142		0	1.58125e+07	0.003	0.01789		0.133427	2	1487.7	-0.554042	35.6599	0
P05783	Keratin, type I cytoskeletal 18 OS=Homo sapiens OX=9606 GN=KRT18 PE=1 SV=2 - [K1C18_HUMAN]	286.737	29.53	1	8	8	17	1.00703e+07	430	48.0285	5.45264	-
	A3	Sequence	# PSMs	# Proteins	# Protein Groups	Protein Group Accessions	Modifications	ΔCn	Area	q-Value	PEP		Exp Value	Charge	MH+ [Da]	ΔM [ppm]	RT [min]	# Missed Cleavages
	High	AQIFANTVDNAR	3	1	1	P05783		0	6.32816e+06	0	5.906e-07		9.19689e-05	2	1319.67	0.581059	29.2925	0
	High	GGMGSGGLATGIAGGLAGMGGIQNEK	4	1	1	P05783		0	5.05182e+06	0	5.906e-07		0.000503223	2	2261.1	0.290602	49.2804	0
	High	LLEDGEDFNLGDALDSSNSMQTIQK	1	1	1	P05783		0	759770	0	5.906e-07		0.00135576	2	2740.26	-0.149289	51.5706	0
	High	TVQSLEIDLDSMR	1	1	1	P05783		0	3.86996e+06	0	6.956e-07		0.00216609	2	1506.74	-4.39978	48.3133	0
	High	GLQAQIASSGLTVEVDAPK	2	1	1	P05783		0	2.08185e+06	0	5.906e-07		0.0032049	2	1884.01	-0.328998	44.3642	0
	High	ETMQSLNDR	2	1	1	P05783		0	1.22561e+07	0	0.001024		0.0012511	2	1093.49	0.119858	19.7211	0
	High	QAQEYEALLNIK	2	1	1	P05783		0	1.16266e+07	0	4.817e-06		0.0104018	2	1419.75	-0.960552	44.9644	0
	High	LQLETEIEALK	1	1	1	P05783		0	863593	0	0.002235		0.0587052	2	1286.72	-0.00688378	47.0674	0
	High	ETmQSLNDR	1	1	1	P05783	M3(Oxidation)	0	1.44947e+06	0.004	0.03372		0.0417417	2	1109.49	-0.13973	19.7956	0
P08670	Vimentin OS=Homo sapiens OX=9606 GN=VIM PE=1 SV=4 - [VIME_HUMAN]	265.945	22.1	1	8	9	17	7.0252e+06	466	53.6191	5.12256	0.0103532
	A3	Sequence	# PSMs	# Proteins	# Protein Groups	Protein Group Accessions	Modifications	ΔCn	Area	q-Value	PEP		Exp Value	Charge	MH+ [Da]	ΔM [ppm]	RT [min]	# Missed Cleavages
	High	ILLAELEQLK	2	1	1	P08670		0	2.82105e+06	0	5.906e-07		4.88436e-05	2	1169.72	1.44013	64.371	0
	High	EMEENFAVEAANYQDTIGR	2	1	1	P08670		0	3.57874e+06	0	5.906e-07		0.000317072	2	2186.97	0.501752	45.8263	0
	High	QDVDNASLAR	2	1	1	P08670		0	8.25022e+06	0	1.678e-05		0.000473627	2	1088.53	0.446137	18.922	0
	High	QVDQLTNDK	2	1	1	P08670		0	4.63493e+06	0	0.0001628		0.000635929	2	1060.53	0.165869	17.787	0
	High	EEAENTLQSFR	2	1	1	P08670		0	5.45967e+06	0	6.907e-07		0.000640422	2	1323.62	1.57538	30.2834	0
	High	VESLQEEIAFLK	2	1	1	P08670		0	2.15992e+06	0	5.906e-07		0.00130171	2	1405.76	-0.621711	51.8147	0
	High	LLEGEESR	2	3	3	P08670;P05787;P08729		0	7.3657e+06	0	0.00115		0.00388396	2	932.469	0.490455	18.4357	0
	High	DGQVINETSQHHDDLE	2	1	1	P08670		0	1.25037e+06	0	0.0002991		0.101471	2	1836.8	-0.362357	22.987	0
	High	LQEEMLQR	1	1	1	P08670		0	1.18699e+06	0.004	0.02946		0.388623	2	1046.53	2.55995	24.4682	0
P62805	Histone H4 OS=Homo sapiens OX=9606 GN=H4C1 PE=1 SV=2 - [H4_HUMAN]	264.577	50.49	1	5	5	17	2.01538e+07	103	11.3604	11.356	0.0103532
	A3	Sequence	# PSMs	# Proteins	# Protein Groups	Protein Group Accessions	Modifications	ΔCn	Area	q-Value	PEP		Exp Value	Charge	MH+ [Da]	ΔM [ppm]	RT [min]	# Missed Cleavages
	High	ISGLIYEETR	6	1	1	P62805		0	1.43276e+07	0	5.906e-07		6.53111e-05	2	1180.62	0.125339	34.1077	0
	High	TVTAMDVVYALK	4	1	1	P62805		0	1.99908e+07	0	5.906e-07		0.000100724	2	1310.7	-1.265	51.1593	0
	High	DAVTYTEHAK	3	1	1	P62805		0	2.6143e+07	0	5.906e-07		0.000722777	2	1134.55	2.29371	17.7846	0
	High	VFLENVIR	2	1	1	P62805		0	1.81744e+06	0	5.906e-07		0.00452328	2	989.578	-0.147484	60.6405	0
	High	DNIQGITKPAIR	2	1	1	P62805		0	865705	0	0.0001483		0.054785	2	1325.75	0.235752	26.7128	0
P14625	Endoplasmin OS=Homo sapiens OX=9606 GN=HSP90B1 PE=1 SV=1 - [ENPL_HUMAN]	236.503	10.59	1	5	6	13	8.45194e+06	803	92.4113	4.84326	0.00791717
	A3	Sequence	# PSMs	# Proteins	# Protein Groups	Protein Group Accessions	Modifications	ΔCn	Area	q-Value	PEP		Exp Value	Charge	MH+ [Da]	ΔM [ppm]	RT [min]	# Missed Cleavages
	High	ELISNASDALDK	4	2	2	P14625;P08238		0	1.25855e+07	0	5.906e-07		5.53819e-05	2	1275.64	-0.768294	30.0333	0
	High	EEASDYLELDTIK	2	1	1	P14625		0	5.46691e+06	0	5.906e-07		0.000550802	2	1525.72	-1.77136	43.093	0
	High	LISLTDENALSGNEELTVK	3	1	1	P14625		0	4.88739e+06	0	5.906e-07		0.00088049	2	2046.06	0.550128	58.4615	0
	High	DISTNYYASQK	2	1	1	P14625		0	3.60423e+06	0	5.198e-06		0.00091997	2	1289.6	0.122865	25.408	0
	High	GVVDSDDLPLNVSR	1	1	1	P14625		0	7.30341e+06	0	6.47e-07		0.00340512	2	1485.76	1.97241	38.0738	0
	High	EESDDEAAVEEEEEEK	1	1	1	P14625		0	683671	0	1.579e-06		0.0477894	2	1866.72	-0.338886	22.9287	0
P08758	Annexin A5 OS=Homo sapiens OX=9606 GN=ANXA5 PE=1 SV=2 - [ANXA5_HUMAN]	235.142	27.19	1	6	6	11	3.36662e+06	320	35.9144	5.04639	0.00669915
	A3	Sequence	# PSMs	# Proteins	# Protein Groups	Protein Group Accessions	Modifications	ΔCn	Area	q-Value	PEP		Exp Value	Charge	MH+ [Da]	ΔM [ppm]	RT [min]	# Missed Cleavages
	High	ETSGNLEQLLLAVVK	1	1	1	P08758		0	1.44819e+06	0	5.906e-07		7.66327e-07	2	1613.91	-0.608207	67.2305	0
	High	DPDAGIDEAQVEQDAQALFQAGELK	1	1	1	P08758		0	611581	0	5.906e-07		3.05922e-06	2	2658.24	-3.62476	62.1756	0
	High	YMTISGFQIEETIDR	4	1	1	P08758		0	3.47697e+06	0	5.906e-07		1.97366e-05	2	1802.86	-0.292282	52.3442	0
	High	GTVTDFPGFDER	2	1	1	P08758		0	3.54673e+06	0	5.906e-07		0.00558861	2	1340.61	0.418455	40.0276	0
	High	SEIDLFNIR	2	1	1	P08758		0	3.07617e+06	0	1.018e-06		0.0146369	2	1106.59	0.930165	50.099	0
	High	GAGTDDHTLIR	1	1	1	P08758		0	2.03323e+06	0.004	0.02483		0.529219	2	1155.57	-1.76667	19.6813	0
P53396	ATP-citrate synthase OS=Homo sapiens OX=9606 GN=ACLY PE=1 SV=3 - [ACLY_HUMAN]	232.383	10.81	1	8	8	18	5.49356e+06	1101	120.762	7.32764	0.0109622
	A3	Sequence	# PSMs	# Proteins	# Protein Groups	Protein Group Accessions	Modifications	ΔCn	Area	q-Value	PEP		Exp Value	Charge	MH+ [Da]	ΔM [ppm]	RT [min]	# Missed Cleavages
	High	SGGMSNELNNIISR	2	1	1	P53396		0	3.23785e+06	0	5.906e-07		5.19444e-05	2	1491.72	0.165137	41.8681	0
	High	TTDGVYEGVAIGGDR	2	1	1	P53396		0	4.52938e+06	0	5.906e-07		0.000163522	2	1509.71	-2.33565	31.6539	0
	High	SAYDSTMETMNYAQIR	2	1	1	P53396		0	5.44509e+06	0	5.906e-07		0.000840161	2	1880.82	2.96634	40.7374	0
	High	LGLVGVNLTLDGVK	2	1	1	P53396		0	1.41805e+06	0	5.906e-07		0.00138259	2	1397.84	0.283453	53.0442	0
	High	EAYPEEAYIADLDAK	2	1	1	P53396		0	6.5062e+06	0	5.906e-07		0.00283797	2	1697.79	0.666911	45.8362	0
	High	GQELIYAGMPITEVFK	2	1	1	P53396		0	1.95064e+06	0	7.827e-07		0.00502496	2	1795.93	0.276303	64.4477	0
	High	AFDSGIIPMEFVNK	2	1	1	P53396		0	4.17608e+06	0	8.066e-07		0.00688084	2	1567.78	0.738434	53.5729	0
	High	TIAIIAEGIPEALTR	4	1	1	P53396		0	3.32034e+06	0	2.924e-06		0.0426897	2	1567.91	0.0598741	54.2769	0
P06733	Alpha-enolase OS=Homo sapiens OX=9606 GN=ENO1 PE=1 SV=2 - [ENOA_HUMAN]	230.711	25.12	1	8	8	19	1.70488e+07	434	47.1393	7.38623	0.0115713
	A3	Sequence	# PSMs	# Proteins	# Protein Groups	Protein Group Accessions	Modifications	ΔCn	Area	q-Value	PEP		Exp Value	Charge	MH+ [Da]	ΔM [ppm]	RT [min]	# Missed Cleavages
	High	AAVPSGASTGIYEALELR	4	1	1	P06733		0	2.91248e+07	0	5.906e-07		4.38219e-05	2	1804.94	0.121979	50.3216	0
	High	YISPDQLADLYK	2	1	1	P06733		0	1.47611e+07	0	5.906e-07		0.000262769	2	1425.73	0.213686	47.4984	0
	High	IEEELGSK	1	1	1	P06733		0	7.26039e+06	0	3.498e-06		0.000661526	2	904.462	0.152143	18.6596	0
	High	LMIEMDGTENK	5	1	1	P06733		0	420203	0	5.906e-07		0.000698718	2	1280.59	1.75326	32.673	0
	High	DATNVGDEGGFAPNILENK	2	1	1	P06733		0	6.02847e+06	0	5.906e-07		0.00164436	2	1960.93	1.46798	42.5971	0
	High	GNPTVEVDLFTSK	1	1	1	P06733		0	0	0	6.15e-07		0.0575117	2	1406.72	2.93819	42.5827	0
	High	FTASAGIQVVGDDLTVTNPK	2	1	1	P06733		0	3.10831e+06	0	5.941e-07		0.39383	2	2033.05	-0.460663	47.1208	0
	High	LNVTEQEK	2	1	1	P06733		0	3.04672e+06	0.003	0.01789		0.223274	2	960.499	-0.582227	18.0114	0
Q04695	Keratin, type I cytoskeletal 17 OS=Homo sapiens OX=9606 GN=KRT17 PE=1 SV=2 - [K1C17_HUMAN]	213.193	13.19	1	4	4	9	5.22054e+06	432	48.076	5.021	-
	A3	Sequence	# PSMs	# Proteins	# Protein Groups	Protein Group Accessions	Modifications	ΔCn	Area	q-Value	PEP		Exp Value	Charge	MH+ [Da]	ΔM [ppm]	RT [min]	# Missed Cleavages
	High	EVATNSELVQSGK	2	1	1	Q04695		0	6.19466e+06	0	5.906e-07		2.01768e-06	2	1361.69	0.598241	20.731	0
	High	ASLEGNLAETENR	2	1	1	Q04695		0	3.0759e+06	0	5.906e-07		2.28461e-05	2	1403.68	0.70552	26.5284	0
	High	ILTATVDNANILLQIDNAR	3	1	1	Q04695		0	792601	0	5.906e-07		0.000252445	2	2068.14	0.308083	53.4836	0
	High	ALEEANTELEVK	2	1	1	Q04695		0	6.39105e+06	0	2.85e-05		0.0383975	2	1345.68	0.269619	28.8327	0
P63104	14-3-3 protein zeta/delta OS=Homo sapiens OX=9606 GN=YWHAZ PE=1 SV=1 - [1433Z_HUMAN]	207.725	25.71	1	3	5	10	7.86059e+06	245	27.7277	4.79248	0.00609013
	A3	Sequence	# PSMs	# Proteins	# Protein Groups	Protein Group Accessions	Modifications	ΔCn	Area	q-Value	PEP		Exp Value	Charge	MH+ [Da]	ΔM [ppm]	RT [min]	# Missed Cleavages
	High	SVTEQGAELSNEER	3	1	1	P63104		0	9.52707e+06	0	5.906e-07		1.25981e-05	2	1548.71	-0.486259	21.9281	0
	High	DSTLIMQLLR	2	5	5	P31946;P62258;P31947;P27348;P63104		0	3.39388e+06	0	5.906e-07		0.00111586	2	1189.66	-0.0378506	66.06	0
	High	GIVDQSQQAYQEAFEISK	2	1	1	P63104		0	1.06608e+07	0	5.906e-07		0.00134522	2	2040.99	-0.238755	46.1956	0
	High	YLAEVAAGDDKK	2	1	1	P63104		0	1.86776e+06	0	5.906e-07		0.00270605	2	1279.65	0.635189	20.6717	1
	High	EMQPTHPIR	1	3	3	P31946;P27348;P63104		0	1.28409e+06	0.003	0.01789		0.00210466	2	1108.56	0.852961	17.7161	0
P08238	Heat shock protein HSP 90-beta OS=Homo sapiens OX=9606 GN=HSP90AB1 PE=1 SV=4 - [HS90B_HUMAN]	205.314	12.98	1	3	8	16	1.17552e+07	724	83.2121	5.03369	0.00974421
	A3	Sequence	# PSMs	# Proteins	# Protein Groups	Protein Group Accessions	Modifications	ΔCn	Area	q-Value	PEP		Exp Value	Charge	MH+ [Da]	ΔM [ppm]	RT [min]	# Missed Cleavages
	High	ELISNASDALDK	4	2	2	P14625;P08238		0	1.25855e+07	0	5.906e-07		5.53819e-05	2	1275.64	-0.768294	30.0333	0
	High	NPDDITQEEYGEFYK	2	1	1	P08238		0	7.60669e+06	0	5.906e-07		0.000108645	2	1847.8	-0.873227	39.5762	0
	High	IEDVGSDEEDDSGKDK	1	1	1	P08238		0	89998.9	0	5.906e-07		0.00285789	2	1737.73	-0.723977	17.3876	1
	High	EDQTEYLEER	2	2	2	P08238;P07900		0	1.22838e+07	0	5.421e-06		0.00483385	2	1311.57	1.79321	25.1989	0
	High	IEDVGSDEEDDSGK	2	1	1	P08238		0	631912	0	5.906e-07		0.00221421	2	1494.61	0.119446	18.4603	0
	High	ADLINNLGTIAK	3	2	2	P08238;P07900		0	8.93182e+06	0	0.0002217		0.347903	2	1242.71	1.63489	42.6122	0
	High	YESLTDPSK	1	2	2	P08238;P07900		0	1.03963e+07	0.003	0.01789		0.0450347	2	1039.49	0.281997	21.1204	0
	High	HNDDEQYAWESSAGGSFTVR	1	2	2	P08238;P07900		0	1.69486e+06	0.003	0.02157		0.243783	3	2255.96	-0.385351	60.5712	0
P62937	Peptidyl-prolyl cis-trans isomerase A OS=Homo sapiens OX=9606 GN=PPIA PE=1 SV=2 - [PPIA_HUMAN]	193.896	32.73	1	5	5	13	4.8321e+06	165	18.0009	7.81104	0.00791717
	A3	Sequence	# PSMs	# Proteins	# Protein Groups	Protein Group Accessions	Modifications	ΔCn	Area	q-Value	PEP		Exp Value	Charge	MH+ [Da]	ΔM [ppm]	RT [min]	# Missed Cleavages
	High	VNPTVFFDIAVDGEPLGR	2	1	1	P62937		0	3.13175e+06	0	5.906e-07		4.26401e-05	2	1946	0.296868	66.2702	0
	High	EGMNIVEAMER	1	1	1	P62937		0	6.46853e+06	0	5.906e-07		0.000288195	2	1278.58	-1.00061	43.5253	0
	High	VSFELFADK	4	1	1	P62937		0	2.73562e+06	0	7.544e-07		0.000532451	2	1055.54	-1.06187	47.3932	0
	High	FEDENFILK	4	1	1	P62937		0	4.89602e+06	0	7.045e-07		0.00237693	2	1154.58	2.15983	42.3639	0
	High	TEWLDGK	2	1	1	P62937		0	1.63245e+06	0	0.00776		0.0115118	2	848.414	-0.500923	27.5589	0
Q14697	Neutral alpha-glucosidase AB OS=Homo sapiens OX=9606 GN=GANAB PE=1 SV=3 - [GANAB_HUMAN]	187.633	5.61	1	4	4	6	2.42552e+06	944	106.807	6.13818	0.00365408
	A3	Sequence	# PSMs	# Proteins	# Protein Groups	Protein Group Accessions	Modifications	ΔCn	Area	q-Value	PEP		Exp Value	Charge	MH+ [Da]	ΔM [ppm]	RT [min]	# Missed Cleavages
	High	DPAEGDGAQPEETPR	2	1	1	Q14697		0	3.53581e+06	0	2.751e-12		2.05205e-08	2	1568.68	-0.149677	18.3752	0
	High	MMDYLQGSGETPQTDVR	2	1	1	Q14697		0	1.84283e+06	0	5.906e-07		0.00107483	2	1927.85	-0.731116	36.0502	0
	High	DENSVELTMAEGPYK	1	1	1	Q14697		0	1.89792e+06	0	2.945e-06		0.0252151	2	1682.76	-0.0791983	38.6021	0
	High	VSQGSKDPAEGDGAQPEETPR	1	1	1	Q14697		0	651391	0	0.0008961		0.0539227	3	2154.99	-2.07173	18.0739	1
Q15149	Plectin OS=Homo sapiens OX=9606 GN=PLEC PE=1 SV=3 - [PLEC_HUMAN]	182.035	3.05	1	9	9	15	1.06551e+06	4684	531.466	5.96045	0.0091352
	A3	Sequence	# PSMs	# Proteins	# Protein Groups	Protein Group Accessions	Modifications	ΔCn	Area	q-Value	PEP		Exp Value	Charge	MH+ [Da]	ΔM [ppm]	RT [min]	# Missed Cleavages
	High	LLDAQLSTGGIVDPSK	2	1	1	Q15149		0	871184	0	5.906e-07		2.80975e-06	2	1613.87	-0.303781	39.8741	0
	High	DPYTEQTISLFQAMK	1	1	1	Q15149		0	809810	0	5.906e-07		0.00049348	2	1771.86	-0.250725	54.4472	0
	High	AYSDPSTGEPATYGELQQR	2	1	1	Q15149		0	838756	0	5.906e-07		0.00339957	2	2069.94	-0.547018	30.1547	0
	High	SSSVGSSSSYPISPAVSR	2	1	1	Q15149		0	1.3461e+06	0	5.906e-07		0.0140648	2	1754.86	-0.112272	29.2001	0
	High	VQSGSESVIQEYVDLR	2	1	1	Q15149		0	948579	0	2.05e-06		0.0240032	2	1808.9	0.653889	49.5361	0
	High	DPYTGQQISLFQAMQK	1	1	1	Q15149		0	417229	0	3.544e-06		0.128366	2	1854.9	-3.53546	48.9725	0
	High	VPVDVAYQR	3	1	1	Q15149		0	700828	0	0.001956		0.164923	2	1046.56	1.00437	25.2983	0
	High	LLEAQAcTGGIIDPSTGER	1	1	1	Q15149	C7(Methylthio)	0	689704	0	9.325e-06		0.328124	2	1976.94	-0.861582	46.0253	0
	High	LLDPEDVDVPQPDEK	1	1	1	Q15149		0	901840	0.008	0.1077		1.22993	2	1708.83	1.5019	37.726	0
P08195	4F2 cell-surface antigen heavy chain OS=Homo sapiens OX=9606 GN=SLC3A2 PE=1 SV=3 - [4F2_HUMAN]	180.158	8.73	1	4	4	6	7.16389e+06	630	67.9517	5.0083	0.00365408
	A3	Sequence	# PSMs	# Proteins	# Protein Groups	Protein Group Accessions	Modifications	ΔCn	Area	q-Value	PEP		Exp Value	Charge	MH+ [Da]	ΔM [ppm]	RT [min]	# Missed Cleavages
	High	VAEDEAEAAAAAK	2	1	1	P08195		0	1.26306e+07	0	5.906e-07		5.79124e-08	2	1245.59	-0.742672	19.7191	0
	High	DDVAQTDLLQIDPNFGSK	2	1	1	P08195		0	5.0626e+06	0	5.906e-07		0.000466891	2	1975.96	-0.84377	49.8283	0
	High	GQSEDPGSLLSLFR	1	1	1	P08195		0	608651	0	1.952e-06		0.0792789	2	1505.76	0.27494	65.3596	0
	High	EEGSPLELER	1	1	1	P08195		0	3.79844e+06	0.003	0.0186		0.550583	2	1158.56	-0.318678	29.3641	0
P07900	Heat shock protein HSP 90-alpha OS=Homo sapiens OX=9606 GN=HSP90AA1 PE=1 SV=5 - [HS90A_HUMAN]	174.017	14.34	1	3	8	17	1.05373e+07	732	84.6067	5.021	0.0103532
	A3	Sequence	# PSMs	# Proteins	# Protein Groups	Protein Group Accessions	Modifications	ΔCn	Area	q-Value	PEP		Exp Value	Charge	MH+ [Da]	ΔM [ppm]	RT [min]	# Missed Cleavages
	High	TLTIVDTGIGMTK	4	1	2	P07900;P08238		0	3.12016e+06	0	5.906e-07		8.55041e-05	2	1349.73	-1.90416	41.9331	0
	High	NPDDITNEEYGEFYK	2	1	1	P07900		0	8.15077e+06	0	5.906e-07		5.80054e-05	2	1833.78	-0.866268	38.8687	0
	High	EDQTEYLEER	2	2	2	P08238;P07900		0	1.22838e+07	0	5.421e-06		0.00483385	2	1311.57	1.79321	25.1989	0
	High	ELISNSSDALDK	3	1	1	P07900		0	6.05446e+06	0	0.01675		0.0437858	2	1291.64	1.00827	26.2733	0
	High	ADLINNLGTIAK	3	2	2	P08238;P07900		0	8.93182e+06	0	0.0002217		0.347903	2	1242.71	1.63489	42.6122	0
	High	YYTSASGDEMVSLK	1	1	1	P07900		0	3.79692e+06	0	3.838e-05		0.605816	2	1550.71	1.05044	34.1899	0
	High	YESLTDPSK	1	2	2	P08238;P07900		0	1.03963e+07	0.003	0.01789		0.0450347	2	1039.49	0.281997	21.1204	0
	High	HNDDEQYAWESSAGGSFTVR	1	2	2	P08238;P07900		0	1.69486e+06	0.003	0.02157		0.243783	3	2255.96	-0.385351	60.5712	0
P13647	Keratin, type II cytoskeletal 5 OS=Homo sapiens OX=9606 GN=KRT5 PE=1 SV=3 - [K2C5_HUMAN]	171.711	12.88	1	7	7	12	4.22615e+06	590	62.34	7.73779	-
	A3	Sequence	# PSMs	# Proteins	# Protein Groups	Protein Group Accessions	Modifications	ΔCn	Area	q-Value	PEP		Exp Value	Charge	MH+ [Da]	ΔM [ppm]	RT [min]	# Missed Cleavages
	High	VDALMDEINFMK	2	1	1	P13647		0	2.13242e+06	0	5.906e-07		0.000865897	2	1425.67	-0.343005	53.2601	0
	High	AQYEEIANR	2	1	1	P13647		0	3.31284e+06	0	2.933e-06		0.00228899	2	1093.53	0.193977	21.5519	0
	High	TEAESWYQTK	2	1	1	P13647		0	2.24536e+06	0	2.85e-06		0.00118271	2	1242.56	-0.862436	28.2532	0
	High	HEISEMNR	2	1	1	P13647		0	1.09306e+06	0	0.0004598		0.00339072	2	1015.46	-2.07244	16.6336	0
	High	YEELQQTAGR	2	1	1	P13647		0	7.12026e+06	0	0.001215		0.0610346	2	1194.57	-0.18975	20.493	0
	High	NLDLDSIIAEVK	1	1	1	P13647		0	496141	0	0.002001		0.269079	2	1329.73	-0.252453	56.0095	0
	High	QcANLQNAIADAEQR	1	1	1	P13647	C2(Methylthio)	0	2.01334e+06	0	7.468e-07		0.137481	2	1690.76	0.406636	43.6127	0
P60174	Triosephosphate isomerase OS=Homo sapiens OX=9606 GN=TPI1 PE=1 SV=3 - [TPIS_HUMAN]	168.43	30.77	1	6	6	12	3.51797e+06	286	30.7717	5.92236	0.00730816
	A3	Sequence	# PSMs	# Proteins	# Protein Groups	Protein Group Accessions	Modifications	ΔCn	Area	q-Value	PEP		Exp Value	Charge	MH+ [Da]	ΔM [ppm]	RT [min]	# Missed Cleavages
	High	VPADTEVVcAPPTAYIDFAR	2	1	1	P60174	C9(Methylthio)	0	1.40202e+06	0	5.906e-07		0.000253972	2	2181.04	0.269648	56.7057	0
	High	IAVAAQNcYK	2	1	1	P60174	C8(Methylthio)	0	2.97436e+06	0	5.906e-07		0.000516604	2	1126.54	0.411578	29.2781	0
	High	VVLAYEPVWAIGTGK	2	1	1	P60174		0	3.81633e+06	0	5.906e-07		0.00302786	2	1602.89	-0.378047	53.6357	0
	High	VTNGAFTGEISPGMIK	2	1	1	P60174		0	3.76324e+06	0	5.906e-07		0.0145837	2	1621.83	1.26459	41.2443	0
	High	IIYGGSVTGATcK	2	1	1	P60174	C12(Methylthio)	0	1.58973e+06	0	3.606e-06		0.057484	2	1315.64	-0.592404	33.4237	0
	High	QSLGELIGTLNAAK	2	1	1	P60174		0	2.21856e+06	0	1.97e-06		0.068976	2	1414.79	-1.21122	51.1816	0
P21796	Voltage-dependent anion-selective channel protein 1 OS=Homo sapiens OX=9606 GN=VDAC1 PE=1 SV=2 - [VDAC1_HUMAN]	163.691	25.44	1	5	5	10	5.70173e+06	283	30.7536	8.54346	0.00609013
	A3	Sequence	# PSMs	# Proteins	# Protein Groups	Protein Group Accessions	Modifications	ΔCn	Area	q-Value	PEP		Exp Value	Charge	MH+ [Da]	ΔM [ppm]	RT [min]	# Missed Cleavages
	High	VTQSNFAVGYK	2	1	1	P21796		0	7.20397e+06	0	5.906e-07		3.95473e-05	2	1213.62	-0.149982	28.3206	0
	High	YQIDPDAcFSAK	2	1	1	P21796	C8(Methylthio)	0	5.04735e+06	0	5.906e-07		0.000953062	2	1403.6	0.0293511	46.92	0
	High	WTEYGLTFTEK	2	1	1	P21796		0	4.67896e+06	0	5.906e-07		0.00331926	2	1374.66	1.05766	45.3709	0
	High	WNTDNTLGTEITVEDQLAR	1	1	1	P21796		0	3.48004e+06	0	5.906e-07		0.00942258	2	2176.06	2.71293	48.5473	0
	High	SENGLEFTSSGSANTETTK	3	1	1	P21796		0	4.85387e+06	0	5.906e-07		0.00571916	2	1959.88	1.67858	28.9676	0
P05023	Sodium/potassium-transporting ATPase subunit alpha-1 OS=Homo sapiens OX=9606 GN=ATP1A1 PE=1 SV=1 - [AT1A1_HUMAN]	158.427	8.11	1	5	5	9	2.07859e+06	1023	112.824	5.49072	0.00548112
	A3	Sequence	# PSMs	# Proteins	# Protein Groups	Protein Group Accessions	Modifications	ΔCn	Area	q-Value	PEP		Exp Value	Charge	MH+ [Da]	ΔM [ppm]	RT [min]	# Missed Cleavages
	High	VDNSSLTGESEPQTR	2	1	1	P05023		0	2.54536e+06	0	5.906e-07		0.000231618	2	1619.75	0.13759	20.3587	0
	High	SPDFTNENPLETR	2	1	1	P05023		0	1.93851e+06	0	5.906e-07		0.000319935	2	1519.7	-1.65467	35.6235	0
	High	GVGIISEGNETVEDIAAR	2	1	1	P05023		0	1.75189e+06	0	5.906e-07		0.000965104	2	1829.93	1.10479	43.9676	0
	High	QGAIVAVTGDGVNDSPALK	2	1	1	P05023		0	1.64527e+06	0	5.964e-07		0.00439557	2	1811.95	-0.805455	35.3399	0
	High	NLEAVETLGSTSTIcSDK	1	1	1	P05023	C15(Methylthio)	0	891381	0	1.101e-06		0.205177	2	1913.88	-0.216456	47.6219	0
P61604	10 kDa heat shock protein, mitochondrial OS=Homo sapiens OX=9606 GN=HSPE1 PE=1 SV=2 - [CH10_HUMAN]	157.296	23.53	1	2	2	5	4.38305e+06	102	10.9249	8.92432	0.00304507
	A3	Sequence	# PSMs	# Proteins	# Protein Groups	Protein Group Accessions	Modifications	ΔCn	Area	q-Value	PEP		Exp Value	Charge	MH+ [Da]	ΔM [ppm]	RT [min]	# Missed Cleavages
	High	VLQATVVAVGSGSK	3	1	1	P61604		0	5.80266e+06	0	5.906e-07		1.61066e-05	2	1315.76	2.53757	28.468	0
	High	GGEIQPVSVK	2	1	1	P61604		0	2.96343e+06	0	7.384e-06		0.000216485	2	1013.56	-0.032229	22.4218	0
P38646	Stress-70 protein, mitochondrial OS=Homo sapiens OX=9606 GN=HSPA9 PE=1 SV=2 - [GRP75_HUMAN]	153.519	17.38	1	8	8	13	4.19827e+06	679	73.6348	6.16357	0.00791717
	A3	Sequence	# PSMs	# Proteins	# Protein Groups	Protein Group Accessions	Modifications	ΔCn	Area	q-Value	PEP		Exp Value	Charge	MH+ [Da]	ΔM [ppm]	RT [min]	# Missed Cleavages
	High	VINEPTAAALAYGLDK	2	1	1	P38646		0	3.98023e+06	0	5.906e-07		1.29424e-05	2	1645.88	-0.640182	44.8009	0
	High	QAVTNPNNTFYATK	2	1	1	P38646		0	4.71971e+06	0	5.906e-07		0.0042105	2	1568.77	0.182424	26.7599	0
	High	DAGQISGLNVLR	2	1	1	P38646		0	1.53703e+06	0	5.906e-07		0.0052266	2	1242.68	0.0660508	39.8858	0
	High	EQQIVIQSSGGLSK	2	1	1	P38646		0	2.55518e+06	0	8.052e-05		0.0652021	2	1473.79	-2.31389	28.5433	0
	High	NAVITVPAYFNDSQR	2	1	1	P38646		0	3.89486e+06	0	6.401e-06		0.145162	2	1694.85	0.466216	44.5176	0
	High	SQVFSTAADGQTQVEIK	1	1	1	P38646		0	1.82883e+06	0	1.112e-05		0.164335	2	1808.9	0.783327	33.5813	0
	High	STNGDTFLGGEDFDQALLR	1	1	1	P38646		0	2.44582e+06	0	9.956e-07		0.169968	2	2055.96	0.152971	53.1865	0
	High	VQQTVQDLFGR	1	1	1	P38646		0	1.0906e+06	0.009	0.1632		0.192232	2	1290.68	-1.72565	39.1479	0
P00558	Phosphoglycerate kinase 1 OS=Homo sapiens OX=9606 GN=PGK1 PE=1 SV=3 - [PGK1_HUMAN]	153.04	15.83	1	4	4	6	3.01388e+06	417	44.5861	8.104	0.00365408
	A3	Sequence	# PSMs	# Proteins	# Protein Groups	Protein Group Accessions	Modifications	ΔCn	Area	q-Value	PEP		Exp Value	Charge	MH+ [Da]	ΔM [ppm]	RT [min]	# Missed Cleavages
	High	VLNNMEIGTSLFDEEGAK	2	1	1	P00558		0	4.9844e+06	0	5.906e-07		1.87971e-05	2	1966.94	0.710796	49.6657	0
	High	VLPGVDALSNI	2	1	1	P00558		0	1.99607e+06	0	5.906e-07		1.44958e-05	2	1097.62	-0.330465	52.2651	0
	High	TGQATVASGIPAGWMGLDcGPESSK	1	1	1	P00558	C19(Methylthio)	0	606473	0	1.53e-06		0.292078	2	2466.11	0.189311	54.7589	0
	High	ITLPVDFVTADK	1	1	1	P00558		0	2.06116e+06	0.003	0.01789		0.710019	2	1318.73	0.391573	50.3513	0
P29966	Myristoylated alanine-rich C-kinase substrate OS=Homo sapiens OX=9606 GN=MARCKS PE=1 SV=4 - [MARCS_HUMAN]	152.38	24.7	1	4	4	6	742437	332	31.5359	4.44971	0.00365408
	A3	Sequence	# PSMs	# Proteins	# Protein Groups	Protein Group Accessions	Modifications	ΔCn	Area	q-Value	PEP		Exp Value	Charge	MH+ [Da]	ΔM [ppm]	RT [min]	# Missed Cleavages
	High	EAGEGGEAEAPAAEGGK	2	1	1	P29966		0	788890	0	2.162e-07		1.14671e-06	2	1529.67	-2.45746	16.8915	0
	High	GEPAAAAAPEAGASPVEK	1	1	1	P29966		0	756131	0	5.906e-07		0.00132773	2	1622.8	-1.4167	21.9838	0
	High	AEDGATPSPSNETPK	2	1	1	P29966		0	682289	0	6.014e-07		0.0022456	2	1500.68	-2.03977	17.6495	0
	High	EELQANGSAPAADKEEPAAAGSGAASPSAAEK	1	1	1	P29966		0	348138	0	5.906e-07		0.0526893	3	2982.4	2.85099	22.5056	1
P27348	14-3-3 protein theta OS=Homo sapiens OX=9606 GN=YWHAQ PE=1 SV=1 - [1433T_HUMAN]	152.217	21.63	1	2	5	9	4.29014e+06	245	27.7468	4.77979	0.00548112
	A3	Sequence	# PSMs	# Proteins	# Protein Groups	Protein Group Accessions	Modifications	ΔCn	Area	q-Value	PEP		Exp Value	Charge	MH+ [Da]	ΔM [ppm]	RT [min]	# Missed Cleavages
	High	AVTEQGAELSNEER	2	1	1	P27348		0	3.49701e+06	0	5.906e-07		8.47976e-06	2	1532.72	0.72742	21.3332	0
	High	DSTLIMQLLR	2	5	5	P31946;P62258;P31947;P27348;P63104		0	3.39388e+06	0	5.906e-07		0.00111586	2	1189.66	-0.0378506	66.06	0
	High	YLIANATNPESK	2	1	1	P27348		0	1.12923e+06	0	5.906e-07		0.0210778	2	1320.68	0.307318	27.1025	0
	High	VISSIEQK	2	2	3	P31946;P27348;P31947		0	5.97953e+06	0	0.0002703		0.0460099	2	903.515	0.0937851	19.7292	0
	High	EMQPTHPIR	1	3	3	P31946;P27348;P63104		0	1.28409e+06	0.003	0.01789		0.00210466	2	1108.56	0.852961	17.7161	0
P25705	ATP synthase subunit alpha, mitochondrial OS=Homo sapiens OX=9606 GN=ATP5F1A PE=1 SV=1 - [ATPA_HUMAN]	151.096	13.2	1	5	5	9	6.59089e+06	553	59.7136	9.12939	0.00548112
	A3	Sequence	# PSMs	# Proteins	# Protein Groups	Protein Group Accessions	Modifications	ΔCn	Area	q-Value	PEP		Exp Value	Charge	MH+ [Da]	ΔM [ppm]	RT [min]	# Missed Cleavages
	High	GMSLNLEPDNVGVVVFGNDK	3	1	1	P25705		0	2.49403e+06	0	5.906e-07		7.13398e-05	2	2104.03	-4.13817	62.1998	0
	High	ILGADTSVDLEETGR	2	1	1	P25705		0	7.29026e+06	0	5.906e-07		0.00401991	2	1575.78	-1.21464	35.5872	0
	High	TGAIVDVPVGEELLGR	1	1	1	P25705		0	9.81194e+06	0	1.373e-06		0.0128852	2	1624.89	0.143621	50.4586	0
	High	NVQAEEMVEFSSGLK	2	1	1	P25705		0	2.67048e+06	0	5.584e-06		0.057422	2	1667.8	0.733103	45.1012	0
	High	LELAQYR	1	1	1	P25705		0	0	0.005	0.07001		0.170132	2	892.489	0.586087	29.2159	0
P27824	Calnexin OS=Homo sapiens OX=9606 GN=CANX PE=1 SV=2 - [CALX_HUMAN]	150.03	4.56	1	2	2	3	2.9561e+06	592	67.5259	4.60205	0.00182704
	A3	Sequence	# PSMs	# Proteins	# Protein Groups	Protein Group Accessions	Modifications	ΔCn	Area	q-Value	PEP		Exp Value	Charge	MH+ [Da]	ΔM [ppm]	RT [min]	# Missed Cleavages
	High	SDAEEDGGTVSQEEEDR	2	1	1	P27824		0	3.32711e+06	0	5.41589e-15		1.58301e-09	2	1852.73	-0.525107	19.3283	0
	High	KTDAPQPDVK	1	1	1	P27824		0	2.58508e+06	0.005	0.06303		0.109971	2	1098.58	-0.105845	15.5279	1
Q9UJZ1	Stomatin-like protein 2, mitochondrial OS=Homo sapiens OX=9606 GN=STOML2 PE=1 SV=1 - [STML2_HUMAN]	140.91	13.48	1	3	3	6	1.16859e+06	356	38.5102	7.38623	0.00365408
	A3	Sequence	# PSMs	# Proteins	# Protein Groups	Protein Group Accessions	Modifications	ΔCn	Area	q-Value	PEP		Exp Value	Charge	MH+ [Da]	ΔM [ppm]	RT [min]	# Missed Cleavages
	High	ASYGVEDPEYAVTQLAQTTMR	2	1	1	Q9UJZ1		0	947016	0	5.906e-07		4.46591e-05	2	2330.1	-0.637191	54.4281	0
	High	NTVVLFVPQQEAWVVER	2	1	1	Q9UJZ1		0	1.16471e+06	0	5.906e-07		0.000763603	2	2014.08	0.909075	54.9549	0
	High	ESAINVAEGK	2	1	1	Q9UJZ1		0	1.39404e+06	0	0.01317		0.38149	2	1017.52	0.834336	21.6063	0
P09211	Glutathione S-transferase P OS=Homo sapiens OX=9606 GN=GSTP1 PE=1 SV=2 - [GSTP1_HUMAN]	140.19	32.38	1	4	4	10	2.46376e+06	210	23.341	5.64307	0.00609013
	A3	Sequence	# PSMs	# Proteins	# Protein Groups	Protein Group Accessions	Modifications	ΔCn	Area	q-Value	PEP		Exp Value	Charge	MH+ [Da]	ΔM [ppm]	RT [min]	# Missed Cleavages
	High	FQDGDLTLYQSNTILR	2	1	1	P09211		0	2.61226e+06	0	3.668e-09		4.02042e-07	2	1883.95	-0.623851	47.3628	0
	High	DQQEAALVDMVNDGVEDLR	4	1	1	P09211		0	2.96483e+06	0	5.906e-07		0.00158139	2	2116.98	-0.425517	56.4748	0
	High	AFLASPEYVNLPINGNGK	2	1	1	P09211		0	1.8142e+06	0	7.814e-07		0.135765	2	1903.99	0.864615	48.9905	0
	High	EEVVTVETWQEGSLK	2	1	1	P09211		0	1.71028e+06	0	0.0003162		0.211495	2	1733.86	-0.563676	41.5318	0
P68104	Elongation factor 1-alpha 1 OS=Homo sapiens OX=9606 GN=EEF1A1 PE=1 SV=1 - [EF1A1_HUMAN]	130.486	17.53	2	6	6	13	1.53803e+07	462	50.1091	9.01221	0.00791717
	A3	Sequence	# PSMs	# Proteins	# Protein Groups	Protein Group Accessions	Modifications	ΔCn	Area	q-Value	PEP		Exp Value	Charge	MH+ [Da]	ΔM [ppm]	RT [min]	# Missed Cleavages
	High	IGGIGTVPVGR	3	2	1	P68104		0	2.35377e+07	0	5.914e-07		0.000313217	2	1025.61	0.362713	30.1868	0
	High	YYVTIIDAPGHR	4	2	1	P68104		0	3.31407e+06	0	5.906e-07		0.00653268	2	1404.73	-1.4509	61.9594	0
	High	THINIVVIGHVDSGK	1	2	1	P68104		0	980914	0	6.461e-07		0.0157799	3	1588.88	0.126625	66.6422	0
	High	STTTGHLIYK	1	2	1	P68104		0	1.05711e+07	0	0.01129		0.0206944	2	1120.6	0.596194	20.7095	0
	High	VETGVLKPGMVVTFAPVNVTTEVK	3	2	1	P68104		0	1.20322e+07	0	4.918e-06		0.094665	3	2515.38	-1.42044	65.1158	0
	High	QTVAVGVIK	1	2	1	P68104		0	7.68083e+06	0.004	0.03218		0.00694053	2	914.57	3.28306	25.7575	0
P31946	14-3-3 protein beta/alpha OS=Homo sapiens OX=9606 GN=YWHAB PE=1 SV=3 - [1433B_HUMAN]	130.282	29.27	1	3	6	9	3.85849e+06	246	28.0648	4.83057	0.00548112
	A3	Sequence	# PSMs	# Proteins	# Protein Groups	Protein Group Accessions	Modifications	ΔCn	Area	q-Value	PEP		Exp Value	Charge	MH+ [Da]	ΔM [ppm]	RT [min]	# Missed Cleavages
	High	AVTEQGHELSNEER	2	1	1	P31946		0	1.60599e+06	0	1.295e-08		9.76156e-07	2	1598.74	-0.486388	18.2078	0
	High	DSTLIMQLLR	2	5	5	P31946;P62258;P31947;P27348;P63104		0	3.39388e+06	0	5.906e-07		0.00111586	2	1189.66	-0.0378506	66.06	0
	High	VISSIEQK	2	2	3	P31946;P27348;P31947		0	5.97953e+06	0	0.0002703		0.0460099	2	903.515	0.0937851	19.7292	0
	High	QTTVSNSQQAYQEAFEISK	1	1	1	P31946		0	2.0333e+06	0	0.004153		0.48188	2	2159.02	-0.898713	39.0851	0
	High	EMQPTHPIR	1	3	3	P31946;P27348;P63104		0	1.28409e+06	0.003	0.01789		0.00210466	2	1108.56	0.852961	17.7161	0
	High	YLIPNATQPESK	1	1	1	P31946		0	2.20206e+06	0.004	0.02787		0.177563	2	1360.71	0.0821103	30.0477	0
P11413	Glucose-6-phosphate 1-dehydrogenase OS=Homo sapiens OX=9606 GN=G6PD PE=1 SV=4 - [G6PD_HUMAN]	122.157	8.16	1	3	3	5	2.09242e+06	515	59.219	6.84424	0.00304507
	A3	Sequence	# PSMs	# Proteins	# Protein Groups	Protein Group Accessions	Modifications	ΔCn	Area	q-Value	PEP		Exp Value	Charge	MH+ [Da]	ΔM [ppm]	RT [min]	# Missed Cleavages
	High	NSYVAGQYDDAASYQR	2	1	1	P11413		0	3.96313e+06	0	5.47e-10		5.96115e-07	2	1807.79	0.154026	29.6088	0
	High	GGYFDEFGIIR	2	1	1	P11413		0	825960	0	5.928e-07		0.000168365	2	1273.62	0.703985	52.6264	0
	High	DGLLPENTFIVGYAR	1	1	1	P11413		0	1.48816e+06	0.003	0.01822		0.421231	2	1664.86	-0.376151	53.7101	0
P06748	Nucleophosmin OS=Homo sapiens OX=9606 GN=NPM1 PE=1 SV=2 - [NPM_HUMAN]	121.495	13.95	1	3	3	8	4.60046e+06	294	32.5548	4.77979	0.00487211
	A3	Sequence	# PSMs	# Proteins	# Protein Groups	Protein Group Accessions	Modifications	ΔCn	Area	q-Value	PEP		Exp Value	Charge	MH+ [Da]	ΔM [ppm]	RT [min]	# Missed Cleavages
	High	DELHIVEAEAMNYEGSPIK	5	1	1	P06748		0	4.07744e+06	0	5.906e-07		0.000682792	2	2145.02	-0.373153	62.4914	0
	High	GPSSVEDIK	2	1	1	P06748		0	8.80424e+06	0	1.463e-06		0.000513821	2	931.473	-0.349319	19.7397	0
	High	VDNDENEHQLSLR	1	1	1	P06748		0	919682	0	0.005018		0.129171	2	1568.73	0.0170632	22.3665	0
O00299	Chloride intracellular channel protein 1 OS=Homo sapiens OX=9606 GN=CLIC1 PE=1 SV=4 - [CLIC1_HUMAN]	120.822	17.43	1	3	3	7	3.28123e+06	241	26.9057	5.17334	0.00426309
	A3	Sequence	# PSMs	# Proteins	# Protein Groups	Protein Group Accessions	Modifications	ΔCn	Area	q-Value	PEP		Exp Value	Charge	MH+ [Da]	ΔM [ppm]	RT [min]	# Missed Cleavages
	High	GVTFNVTTVDTK	2	1	1	O00299		0	1.35914e+06	0	5.906e-07		2.63376e-05	2	1281.67	0.812973	34.5479	0
	High	LAALNPESNTAGLDIFAK	3	1	1	O00299		0	5.51461e+06	0	5.906e-07		0.00189117	2	1844.98	-0.0455153	51.035	0
	High	NSNPALNDNLEK	2	1	1	O00299		0	2.96994e+06	0	6.699e-06		0.0414074	2	1328.64	0.513071	22.6039	0
P07737	Profilin-1 OS=Homo sapiens OX=9606 GN=PFN1 PE=1 SV=2 - [PROF1_HUMAN]	119.487	30	1	3	3	7	6.08852e+06	140	15.0446	8.26514	0.00426309
	A3	Sequence	# PSMs	# Proteins	# Protein Groups	Protein Group Accessions	Modifications	ΔCn	Area	q-Value	PEP		Exp Value	Charge	MH+ [Da]	ΔM [ppm]	RT [min]	# Missed Cleavages
	High	TFVNITPAEVGVLVGK	2	1	1	P07737		0	7.16381e+06	0	5.906e-07		0.000179521	2	1643.94	-0.270329	54.5976	0
	High	DSLLQDGEFSMDLR	3	1	1	P07737		0	7.36257e+06	0	5.906e-07		0.00113822	2	1625.75	0.948367	51.4013	0
	High	DSPSVWAAVPGK	2	1	1	P07737		0	3.73918e+06	0	1.155e-06		0.00403165	2	1213.62	-0.979371	36.6045	0
P80723	Brain acid soluble protein 1 OS=Homo sapiens OX=9606 GN=BASP1 PE=1 SV=2 - [BASP1_HUMAN]	118.455	42.29	1	5	5	9	1.32875e+06	227	22.68	4.62744	0.00548112
	A3	Sequence	# PSMs	# Proteins	# Protein Groups	Protein Group Accessions	Modifications	ΔCn	Area	q-Value	PEP		Exp Value	Charge	MH+ [Da]	ΔM [ppm]	RT [min]	# Missed Cleavages
	High	KTEAPAAPAAQETK	2	1	1	P80723		0	453023	0	5.923e-07		0.00126553	2	1412.74	-0.501872	16.2338	1
	High	SDGAPASDSKPGSSEAAPSSK	2	1	1	P80723		0	146076	0	5.906e-07		0.0034184	2	1932.88	-1.13672	15.7061	0
	High	APEQEQAAPGPAAGGEAPK	2	1	1	P80723		0	762807	0	5.906e-07		0.00730484	2	1775.86	0.563048	19.3048	0
	High	ESEPQAAAEPAEAK	2	1	1	P80723		0	1.65763e+06	0	3.734e-05		0.0519343	2	1427.67	0.0878086	18.1983	0
	High	AAEAAAAPAESAAPAAGEEPSKEEGEPK	1	1	1	P80723		0	1.56582e+06	0.004	0.04936		0.688465	3	2636.23	0.491394	21.6092	1
Q99714	3-hydroxyacyl-CoA dehydrogenase type-2 OS=Homo sapiens OX=9606 GN=HSD17B10 PE=1 SV=3 - [HCD2_HUMAN]	118.37	15.33	1	2	2	5	1.47771e+06	261	26.9061	7.78174	0.00304507
	A3	Sequence	# PSMs	# Proteins	# Protein Groups	Protein Group Accessions	Modifications	ΔCn	Area	q-Value	PEP		Exp Value	Charge	MH+ [Da]	ΔM [ppm]	RT [min]	# Missed Cleavages
	High	LVAGEMGQNEPDQGGQR	2	1	1	Q99714		0	1.43958e+06	0	5.906e-07		1.57134e-06	2	1785.82	0.813401	22.1971	0
	High	LVGQGASAVLLDLPNSGGEAQAK	3	1	1	Q99714		0	1.51584e+06	0	5.906e-07		0.000713283	2	2195.16	-1.20775	46.4604	0
P55072	Transitional endoplasmic reticulum ATPase OS=Homo sapiens OX=9606 GN=VCP PE=1 SV=4 - [TERA_HUMAN]	117.39	6.08	1	3	3	5	1.84976e+06	806	89.2657	5.26221	0.00304507
	A3	Sequence	# PSMs	# Proteins	# Protein Groups	Protein Group Accessions	Modifications	ΔCn	Area	q-Value	PEP		Exp Value	Charge	MH+ [Da]	ΔM [ppm]	RT [min]	# Missed Cleavages
	High	LDQLIYIPLPDEK	2	1	1	P55072		0	1.70211e+06	0	5.906e-07		0.000101646	2	1556.86	-0.312372	54.0936	0
	High	LIVDEAINEDNSVVSLSQPK	2	1	1	P55072		0	1.90003e+06	0	5.906e-07		0.011067	2	2170.12	0.429541	45.3492	0
	High	MTNGFSGADLTEIcQR	1	1	1	P55072	C14(Methylthio)	0	1.94713e+06	0	5.915e-07		0.0102421	2	1788.77	-0.973508	52.7003	0
P34932	Heat shock 70 kDa protein 4 OS=Homo sapiens OX=9606 GN=HSPA4 PE=1 SV=4 - [HSP74_HUMAN]	116.539	3.45	1	2	2	4	368615	840	94.2712	5.18604	0.00243605
	A3	Sequence	# PSMs	# Proteins	# Protein Groups	Protein Group Accessions	Modifications	ΔCn	Area	q-Value	PEP		Exp Value	Charge	MH+ [Da]	ΔM [ppm]	RT [min]	# Missed Cleavages
	High	AESEEMETSQAGSK	2	1	1	P34932		0	426921	0	5.906e-07		8.70607e-07	2	1483.62	-3.79804	16.5673	0
	High	SEENEEPMETDQNAK	2	1	1	P34932		0	310308	0	5.906e-07		3.07052e-05	2	1750.71	0.291294	18.6403	0
Q07065	Cytoskeleton-associated protein 4 OS=Homo sapiens OX=9606 GN=CKAP4 PE=1 SV=2 - [CKAP4_HUMAN]	115.405	14.62	1	6	6	10	3.52736e+06	602	65.9827	5.92236	0.00609013
	A3	Sequence	# PSMs	# Proteins	# Protein Groups	Protein Group Accessions	Modifications	ΔCn	Area	q-Value	PEP		Exp Value	Charge	MH+ [Da]	ΔM [ppm]	RT [min]	# Missed Cleavages
	High	LEGLGSSEADQDGLASTVR	2	1	1	Q07065		0	3.12177e+06	0	5.906e-07		0.000245816	2	1904.92	-1.00744	35.2233	0
	High	STLQTMESDIYTEVR	2	1	1	Q07065		0	2.07211e+06	0	5.916e-07		0.00946904	2	1772.84	1.672	50.0259	0
	High	IETNENNLESAK	1	1	1	Q07065		0	5.38821e+06	0	7.489e-07		0.011387	2	1361.65	-0.378295	19.7332	0
	High	SINDNIAIFTEVQK	2	1	1	Q07065		0	1.45855e+06	0	0.0001314		0.059017	2	1591.83	-1.37538	47.4607	0
	High	EELGQGLQGVEQK	2	1	1	Q07065		0	1.9882e+06	0	0.002525		0.0709855	2	1414.72	1.2161	28.6249	0
	High	VASLEESEGNKQDLK	1	1	1	Q07065		0	429374	0.006	0.09378		0.482885	2	1646.82	-1.0885	20.3994	1
P02786	Transferrin receptor protein 1 OS=Homo sapiens OX=9606 GN=TFRC PE=1 SV=2 - [TFR1_HUMAN]	114.19	5.13	1	3	3	6	1.168e+06	760	84.8179	6.60986	0.00365408
	A3	Sequence	# PSMs	# Proteins	# Protein Groups	Protein Group Accessions	Modifications	ΔCn	Area	q-Value	PEP		Exp Value	Charge	MH+ [Da]	ΔM [ppm]	RT [min]	# Missed Cleavages
	High	DENLALYVENQFR	2	1	1	P02786		0	578680	0	5.906e-07		0.000324022	2	1610.78	0.126788	54.557	0
	High	LAVDEEENADNNTK	2	1	1	P02786		0	2.14482e+06	0	5.906e-07		0.000289841	2	1561.7	-0.333065	19.7419	0
	High	DSAQNSVIIVDK	2	1	1	P02786		0	780485	0	2.178e-06		0.0140572	2	1288.68	0.839108	27.4206	0
P62258	14-3-3 protein epsilon OS=Homo sapiens OX=9606 GN=YWHAE PE=1 SV=1 - [1433E_HUMAN]	113.835	20.39	1	3	4	5	1.94167e+06	255	29.1554	4.7417	0.00304507
	A3	Sequence	# PSMs	# Proteins	# Protein Groups	Protein Group Accessions	Modifications	ΔCn	Area	q-Value	PEP		Exp Value	Charge	MH+ [Da]	ΔM [ppm]	RT [min]	# Missed Cleavages
	High	LIccDILDVLDK	1	1	1	P62258	C3(Methylthio); C4(Methylthio)	0	191467	0	5.906e-07		2.948e-05	2	1454.68	-0.3757	68.3289	0
	High	DSTLIMQLLR	2	5	5	P31946;P62258;P31947;P27348;P63104		0	3.39388e+06	0	5.906e-07		0.00111586	2	1189.66	-0.0378506	66.06	0
	High	EALQDVEDENQ	1	1	1	P62258		0	1.03768e+06	0	9.146e-05		0.00133801	2	1289.55	0.757781	24.5925	0
	High	DNLTLWTSDMQGDGEEQNK	1	1	1	P62258		0	1.39346e+06	0	6.58e-07		0.0169359	2	2180.94	-0.307471	44.6141	0
Q15365	Poly(rC)-binding protein 1 OS=Homo sapiens OX=9606 GN=PCBP1 PE=1 SV=2 - [PCBP1_HUMAN]	112.67	13.2	1	3	3	5	2.20065e+06	356	37.4739	7.09326	0.00304507
	A3	Sequence	# PSMs	# Proteins	# Protein Groups	Protein Group Accessions	Modifications	ΔCn	Area	q-Value	PEP		Exp Value	Charge	MH+ [Da]	ΔM [ppm]	RT [min]	# Missed Cleavages
	High	INISEGNcPER	2	1	1	Q15365	C8(Methylthio)	0	2.76787e+06	0	5.906e-07		9.91901e-05	2	1277.56	0.847887	29.6533	0
	High	ESTGAQVQVAGDMLPNSTER	2	1	1	Q15365		0	2.06782e+06	0	5.906e-07		0.000316174	2	2089.98	-5.14356e-05	34.8582	0
	High	AITIAGVPQSVTEcVK	1	1	1	Q15365	C14(Methylthio)	0	1.76625e+06	0	7.087e-07		0.0322672	2	1661.86	0.13651	50.6201	0
P40926	Malate dehydrogenase, mitochondrial OS=Homo sapiens OX=9606 GN=MDH2 PE=1 SV=3 - [MDHM_HUMAN]	106.261	7.99	1	2	2	3	1.80843e+06	338	35.4807	8.67529	0.00182704
	A3	Sequence	# PSMs	# Proteins	# Protein Groups	Protein Group Accessions	Modifications	ΔCn	Area	q-Value	PEP		Exp Value	Charge	MH+ [Da]	ΔM [ppm]	RT [min]	# Missed Cleavages
	High	VDFPQDQLTALTGR	2	1	1	P40926		0	0	0	5.906e-07		2.64023e-05	2	1560.8	0.21031	46.6245	0
	High	GcDVVVIPAGVPR	1	1	1	P40926	C2(Methylthio)	0	1.80843e+06	0	8.237e-07		0.00226656	2	1327.69	-0.251329	47.4494	0
P30101	Protein disulfide-isomerase A3 OS=Homo sapiens OX=9606 GN=PDIA3 PE=1 SV=4 - [PDIA3_HUMAN]	103.464	17.03	1	7	7	10	2.40598e+06	505	56.7468	6.354	0.00609013
	A3	Sequence	# PSMs	# Proteins	# Protein Groups	Protein Group Accessions	Modifications	ΔCn	Area	q-Value	PEP		Exp Value	Charge	MH+ [Da]	ΔM [ppm]	RT [min]	# Missed Cleavages
	High	FLQDYFDGNLK	2	1	1	P30101		0	1.57404e+06	0	5.906e-07		0.000467035	2	1359.66	0.101021	47.2184	0
	High	ELSDFISYLQR	2	1	1	P30101		0	764003	0	5.906e-07		0.00703755	2	1370.69	-0.52365	54.4148	0
	High	GFPTIYFSPANK	1	1	1	P30101		0	781789	0	7.974e-07		0.0203722	2	1341.68	-0.0356872	47.6149	0
	High	YGVSGYPTLK	2	1	1	P30101		0	1.23279e+06	0	0.0006013		0.0295914	2	1084.57	1.9771	32.6764	0
	High	MDATANDVPSPYEVR	1	1	1	P30101		0	2.86993e+06	0	5.103e-06		0.0933422	2	1664.76	0.690702	33.069	0
	High	SEPIPESNDGPVK	1	1	1	P30101		0	2.77398e+06	0.003	0.01789		0.172519	2	1368.66	0.543077	22.9656	0
	High	EATNPPVIQEEKPK	1	1	1	P30101		0	1.02256e+06	0.006	0.07394		0.223728	2	1579.83	-0.233133	20.9443	0
P23528	Cofilin-1 OS=Homo sapiens OX=9606 GN=CFL1 PE=1 SV=3 - [COF1_HUMAN]	103.18	20.48	1	2	2	6	8.259e+06	166	18.4907	8.08936	0.00365408
	A3	Sequence	# PSMs	# Proteins	# Protein Groups	Protein Group Accessions	Modifications	ΔCn	Area	q-Value	PEP		Exp Value	Charge	MH+ [Da]	ΔM [ppm]	RT [min]	# Missed Cleavages
	High	LGGSAVISLEGKPL	3	1	1	P23528		0	4.94367e+06	0	5.906e-07		0.00159943	2	1340.78	-0.987556	44.5937	0
	High	EILVGDVGQTVDDPYATFVK	3	1	1	P23528		0	1.15743e+07	0	5.906e-07		0.00534228	2	2166.09	-0.951611	61.1198	0
Q9Y4L1	Hypoxia up-regulated protein 1 OS=Homo sapiens OX=9606 GN=HYOU1 PE=1 SV=1 - [HYOU1_HUMAN]	102.15	5.21	1	3	3	4	1011165	999	111.266	5.22412	0.00243605
	A3	Sequence	# PSMs	# Proteins	# Protein Groups	Protein Group Accessions	Modifications	ΔCn	Area	q-Value	PEP		Exp Value	Charge	MH+ [Da]	ΔM [ppm]	RT [min]	# Missed Cleavages
	High	NINADEAAAMGAVYQAAALSK	1	1	1	Q9Y4L1		0	492426	0	5.906e-07		0.00044583	2	2079.02	-0.829508	54.1223	0
	High	AEAGPEGVAPAPEGEK	2	1	1	Q9Y4L1		0	1.60175e+06	0	5.906e-07		0.000580991	2	1508.72	-0.00356655	21.0797	0
	High	DAVITVPVFFNQAER	1	1	1	Q9Y4L1		0	939316	0	6.963e-06		0.128327	2	1705.89	-0.122342	54.6352	0
P08865	40S ribosomal protein SA OS=Homo sapiens OX=9606 GN=RPSA PE=1 SV=4 - [RSSA_HUMAN]	101.346	7.8	1	2	2	4	1.67212e+06	295	32.8334	4.86865	0.00243605
	A3	Sequence	# PSMs	# Proteins	# Protein Groups	Protein Group Accessions	Modifications	ΔCn	Area	q-Value	PEP		Exp Value	Charge	MH+ [Da]	ΔM [ppm]	RT [min]	# Missed Cleavages
	High	FAAATGATPIAGR	2	1	1	P08865		0	2.44224e+06	0	5.906e-07		0.000152071	2	1203.65	0.403664	25.6273	0
	High	sGALDVLQMK	2	1	1	P08865	N-Term(Acetyl)	0	902010	0	5.906e-07		0.000598125	2	1103.58	-0.332398	49.1234	0
P23396	40S ribosomal protein S3 OS=Homo sapiens OX=9606 GN=RPS3 PE=1 SV=2 - [RS3_HUMAN]	98.2508	11.93	1	2	2	4	2.78445e+06	243	26.6714	9.65674	0.00243605
	A3	Sequence	# PSMs	# Proteins	# Protein Groups	Protein Group Accessions	Modifications	ΔCn	Area	q-Value	PEP		Exp Value	Charge	MH+ [Da]	ΔM [ppm]	RT [min]	# Missed Cleavages
	High	ELAEDGYSGVEVR	2	1	1	P23396		0	2.05925e+06	0	5.906e-07		3.70558e-06	2	1423.67	0.556776	30.0534	0
	High	GGKPEPPAMPQPVPTA	2	1	1	P23396		0	3.50964e+06	0	0.01329		0.217721	2	1573.8	-0.867444	31.501	0
Q8NC51	Plasminogen activator inhibitor 1 RNA-binding protein OS=Homo sapiens OX=9606 GN=SERBP1 PE=1 SV=2 - [PAIRB_HUMAN]	95.7167	6.62	1	2	2	3	510494	408	44.9385	8.646	0.00182704
	A3	Sequence	# PSMs	# Proteins	# Protein Groups	Protein Group Accessions	Modifications	ΔCn	Area	q-Value	PEP		Exp Value	Charge	MH+ [Da]	ΔM [ppm]	RT [min]	# Missed Cleavages
	High	SAAQAAAQTNSNAAGK	2	1	1	Q8NC51		0	510494	0	5.906e-07		8.68054e-05	2	1460.71	-0.147557	14.8727	0
	High	RPDQQLQGEGK	1	1	1	Q8NC51		0	0	0	2.434e-05		0.010321	2	1255.64	1.42825	15.5896	0
Q07021	Complement component 1 Q subcomponent-binding protein, mitochondrial OS=Homo sapiens OX=9606 GN=C1QBP PE=1 SV=1 - [C1QBP_HUMAN]	95.02	20.92	1	4	4	8	2.24639e+06	282	31.3426	4.84326	0.00487211
	A3	Sequence	# PSMs	# Proteins	# Protein Groups	Protein Group Accessions	Modifications	ΔCn	Area	q-Value	PEP		Exp Value	Charge	MH+ [Da]	ΔM [ppm]	RT [min]	# Missed Cleavages
	High	AFVDFLSDEIK	2	1	1	Q07021		0	347738	0	5.906e-07		0.000128358	2	1283.65	-0.728231	54.0084	0
	High	VEEQEPELTSTPNFVVEVIK	2	1	1	Q07021		0	3.45986e+06	0	5.906e-07		0.00721556	2	2287.17	-0.655128	53.8743	0
	High	EVSFQSTGESEWK	2	1	1	Q07021		0	2.39423e+06	0	5.906e-07		0.00927163	2	1513.68	1.8537	34.6899	0
	High	MSGGWELELNGTEAK	2	1	1	Q07021		0	885082	0	0.0009826		1.00257	2	1621.75	0.220784	43.8415	0
P06454	Prothymosin alpha OS=Homo sapiens OX=9606 GN=PTMA PE=1 SV=2 - [PTMA_HUMAN]	94.8	25.23	1	2	2	3	2.40194e+06	111	12.196	3.77686	0.00182704
	A3	Sequence	# PSMs	# Proteins	# Protein Groups	Protein Group Accessions	Modifications	ΔCn	Area	q-Value	PEP		Exp Value	Charge	MH+ [Da]	ΔM [ppm]	RT [min]	# Missed Cleavages
	High	AAEDDEDDDVDTKK	2	1	1	P06454		0	766639	0	5.906e-07		1.51643e-06	2	1565.64	-0.204632	15.3063	1
	High	sDAAVDTSSEITTK	1	1	1	P06454	N-Term(Acetyl)	0	4.03724e+06	0.003	0.01815		0.413278	2	1466.68	-1.59482	26.9959	0
P07814	Bifunctional glutamate/proline--tRNA ligase OS=Homo sapiens OX=9606 GN=EPRS PE=1 SV=5 - [SYEP_HUMAN]	92.91	3.7	1	4	4	6	1.13402e+06	1512	170.483	7.32764	0.00365408
	A3	Sequence	# PSMs	# Proteins	# Protein Groups	Protein Group Accessions	Modifications	ΔCn	Area	q-Value	PEP		Exp Value	Charge	MH+ [Da]	ΔM [ppm]	RT [min]	# Missed Cleavages
	High	NQGGGLSSSGAGEGQGPK	2	1	1	P07814		0	1.21366e+06	0	5.906e-07		2.10943e-05	2	1587.73	-1.35484	17.3547	0
	High	AYVDDTPAEQMK	2	1	1	P07814		0	725473	0	0.001901		0.276178	2	1367.62	1.58645	25.3567	0
	High	EVIPVNVPEAQEEMK	1	1	1	P07814		0	762856	0.004	0.03332		0.866991	2	1711.86	-0.13442	39.7255	0
	High	LTVAENEAETK	1	1	1	P07814		0	1.42553e+06	0.004	0.03393		1.06882	2	1204.6	-0.804781	19.8355	0
P49755	Transmembrane emp24 domain-containing protein 10 OS=Homo sapiens OX=9606 GN=TMED10 PE=1 SV=2 - [TMEDA_HUMAN]	91.86	14.61	1	2	2	3	2.39064e+06	219	24.96	7.44482	0.00182704
	A3	Sequence	# PSMs	# Proteins	# Protein Groups	Protein Group Accessions	Modifications	ΔCn	Area	q-Value	PEP		Exp Value	Charge	MH+ [Da]	ΔM [ppm]	RT [min]	# Missed Cleavages
	High	IPDQLVILDMK	2	1	1	P49755		0	2.39064e+06	0	5.906e-07		6.63921e-05	2	1284.72	0.51626	51.0508	0
	High	DLLVTGAYEISDQSGGAGGLR	1	1	1	P49755		0	0	0	5.906e-07		0.0535537	2	2079.03	-2.79105	47.3097	0
P26641	Elongation factor 1-gamma OS=Homo sapiens OX=9606 GN=EEF1G PE=1 SV=3 - [EF1G_HUMAN]	91.73	10.98	1	3	3	5	1.84078e+06	437	50.0871	6.66846	0.00304507
	A3	Sequence	# PSMs	# Proteins	# Protein Groups	Protein Group Accessions	Modifications	ΔCn	Area	q-Value	PEP		Exp Value	Charge	MH+ [Da]	ΔM [ppm]	RT [min]	# Missed Cleavages
	High	AAAPAPEEEMDEcEQALAAEPK	2	1	1	P26641	C13(Methylthio)	0	1.79919e+06	0	5.906e-07		0.000182133	2	2345.99	-0.257792	54.2736	0
	High	ALIAAQYSGAQVR	2	1	1	P26641		0	1.47657e+06	0	5.92e-07		0.00205179	2	1347.74	0.34845	31.306	0
	High	aAGTLYTYPENWR	1	1	1	P26641	N-Term(Acetyl)	0	2.24657e+06	0	0.002025		0.0284714	2	1583.75	1.40169	49.8636	0
P45880	Voltage-dependent anion-selective channel protein 2 OS=Homo sapiens OX=9606 GN=VDAC2 PE=1 SV=2 - [VDAC2_HUMAN]	89.9163	10.54	1	2	2	4	7.32092e+06	294	31.5465	7.56201	0.00243605
	A3	Sequence	# PSMs	# Proteins	# Protein Groups	Protein Group Accessions	Modifications	ΔCn	Area	q-Value	PEP		Exp Value	Charge	MH+ [Da]	ΔM [ppm]	RT [min]	# Missed Cleavages
	High	ScSGVEFSTSGSSNTDTGK	2	1	1	P45880	C2(Methylthio)	0	6.11594e+06	0	5.906e-07		4.075e-07	2	1896.76	-0.363848	29.5285	0
	High	YQLDPTASISAK	2	1	1	P45880		0	8.5259e+06	0	6.697e-06		0.00200751	2	1293.67	-1.07403	32.0589	0
P04899	Guanine nucleotide-binding protein G(i) subunit alpha-2 OS=Homo sapiens OX=9606 GN=GNAI2 PE=1 SV=3 - [GNAI2_HUMAN]	89.55	7.89	1	2	2	4	1.18346e+06	355	40.4251	5.5415	0.00243605
	A3	Sequence	# PSMs	# Proteins	# Protein Groups	Protein Group Accessions	Modifications	ΔCn	Area	q-Value	PEP		Exp Value	Charge	MH+ [Da]	ΔM [ppm]	RT [min]	# Missed Cleavages
	High	YDEAASYIQSK	2	1	1	P04899		0	1.22405e+06	0	5.906e-07		0.000260109	2	1274.59	0.0487365	26.4883	0
	High	EYQLNDSAAYYLNDLER	2	1	1	P04899		0	1.14286e+06	0	5.906e-07		0.00275729	2	2076.95	-0.336257	51.8057	0
Q16881	Thioredoxin reductase 1, cytoplasmic OS=Homo sapiens OX=9606 GN=TXNRD1 PE=1 SV=3 - [TRXR1_HUMAN]	88.8255	6.16	1	3	3	5	1.9711e+06	649	70.8622	7.38623	0.00304507
	A3	Sequence	# PSMs	# Proteins	# Protein Groups	Protein Group Accessions	Modifications	ΔCn	Area	q-Value	PEP		Exp Value	Charge	MH+ [Da]	ΔM [ppm]	RT [min]	# Missed Cleavages
	High	VEQIEAGTPGR	2	1	1	Q16881		0	2.99998e+06	0	5.906e-07		7.19851e-05	2	1156.59	-1.36391	19.9831	0
	High	GFDQDMANK	2	1	1	Q16881		0	0	0	6.892e-06		0.00316454	2	1025.44	-0.252475	20.9787	0
	High	SYDYDLIIIGGGSGGLAAAK	1	1	1	Q16881		0	942221	0	8.555e-06		1.09781	2	1941	0.458915	53.0566	0
P60842	Eukaryotic initiation factor 4A-I OS=Homo sapiens OX=9606 GN=EIF4A1 PE=1 SV=1 - [IF4A1_HUMAN]	86.5469	13.3	1	4	4	7	4.12223e+06	406	46.1246	5.47803	0.00426309
	A3	Sequence	# PSMs	# Proteins	# Protein Groups	Protein Group Accessions	Modifications	ΔCn	Area	q-Value	PEP		Exp Value	Charge	MH+ [Da]	ΔM [ppm]	RT [min]	# Missed Cleavages
	High	GYDVIAQAQSGTGK	2	1	1	P60842		0	6.63887e+06	0	5.906e-07		2.01192e-05	2	1394.69	1.1352	27.9519	0
	High	LNSNTQVVLLSATMPSDVLEVTK	2	1	1	P60842		0	1.33696e+06	0	5.906e-07		0.033484	2	2459.31	-0.43017	55.6502	0
	High	ELAQQIQK	2	1	1	P60842		0	3.84366e+06	0.006	0.09771		0.0326705	2	957.536	0.0775814	18.9241	0
	High	DQIYDIFQK	1	1	1	P60842		0	1.88418e+06	0.006	0.1012		0.183995	2	1169.59	1.49242	45.4286	0
P10599	Thioredoxin OS=Homo sapiens OX=9606 GN=TXN PE=1 SV=3 - [THIO_HUMAN]	84.89	22.86	1	2	2	5	7.15232e+06	105	11.7297	4.91943	0.00304507
	A3	Sequence	# PSMs	# Proteins	# Protein Groups	Protein Group Accessions	Modifications	ΔCn	Area	q-Value	PEP		Exp Value	Charge	MH+ [Da]	ΔM [ppm]	RT [min]	# Missed Cleavages
	High	TAFQEALDAAGDK	4	1	1	P10599		0	1.19226e+07	0	5.906e-07		0.00360568	2	1336.64	-1.02273	38.9255	0
	High	EKLEATINELV	1	1	1	P10599		0	2.38206e+06	0.005	0.06412		1.37669	2	1258.69	0.129669	46.2101	1
Q06830	Peroxiredoxin-1 OS=Homo sapiens OX=9606 GN=PRDX1 PE=1 SV=1 - [PRDX1_HUMAN]	83.76	20.1	1	4	4	8	4.13192e+06	199	22.0963	8.1333	0.00487211
	A3	Sequence	# PSMs	# Proteins	# Protein Groups	Protein Group Accessions	Modifications	ΔCn	Area	q-Value	PEP		Exp Value	Charge	MH+ [Da]	ΔM [ppm]	RT [min]	# Missed Cleavages
	High	QITVNDLPVGR	2	1	1	Q06830		0	5.75226e+06	0	5.941e-05		0.00237851	2	1211.67	-1.87892	35.2584	0
	High	TIAQDYGVLK	2	1	1	Q06830		0	979099	0	0.004866		0.0685181	2	1107.61	1.80715	33.0787	0
	High	ATAVMPDGQFK	3	1	1	Q06830		0	5.47884e+06	0.003	0.01892		0.0267242	2	1164.57	0.405234	28.3957	0
	High	DISLSDYK	1	1	1	Q06830		0	1.16466e+06	0.008	0.1091		0.144978	2	940.463	0.49208	30.7303	0
P37268	Squalene synthase OS=Homo sapiens OX=9606 GN=FDFT1 PE=1 SV=1 - [FDFT_HUMAN]	81.6278	9.11	1	3	3	4	1.95112e+06	417	48.0842	6.53662	0.00243605
	A3	Sequence	# PSMs	# Proteins	# Protein Groups	Protein Group Accessions	Modifications	ΔCn	Area	q-Value	PEP		Exp Value	Charge	MH+ [Da]	ΔM [ppm]	RT [min]	# Missed Cleavages
	High	LFSASEFEDPLVGEDTER	2	1	1	P37268		0	3.72099e+06	0	5.906e-07		0.000109978	2	2040.94	-0.845405	51.5777	0
	High	DYLEDQQGGR	1	1	1	P37268		0	1.66055e+06	0	0.01663		0.00437817	2	1180.52	1.58961	21.2732	0
	High	HVTSEQEWDK	1	1	1	P37268		0	471822	0.009	0.1654		0.445424	2	1258.57	0.946487	19.6247	0
P12236	ADP/ATP translocase 3 OS=Homo sapiens OX=9606 GN=SLC25A6 PE=1 SV=4 - [ADT3_HUMAN]	80.3939	8.39	1	2	2	4	1.56143e+06	298	32.8452	9.74463	0.00243605
	A3	Sequence	# PSMs	# Proteins	# Protein Groups	Protein Group Accessions	Modifications	ΔCn	Area	q-Value	PEP		Exp Value	Charge	MH+ [Da]	ΔM [ppm]	RT [min]	# Missed Cleavages
	High	DFLAGGIAAAISK	2	1	1	P12236		0	0	0	5.906e-07		7.77904e-05	2	1233.68	-0.261024	51.332	0
	High	YFPTQALNFAFK	2	1	1	P12236		0	1.56143e+06	0	2.052e-06		0.012446	2	1446.74	-1.71279	65.2072	0
P12429	Annexin A3 OS=Homo sapiens OX=9606 GN=ANXA3 PE=1 SV=3 - [ANXA3_HUMAN]	80.1767	9.6	1	2	2	4	1.8641e+06	323	36.3527	5.92236	0.00243605
	A3	Sequence	# PSMs	# Proteins	# Protein Groups	Protein Group Accessions	Modifications	ΔCn	Area	q-Value	PEP		Exp Value	Charge	MH+ [Da]	ΔM [ppm]	RT [min]	# Missed Cleavages
	High	SLGDDISSETSGDFR	2	1	1	P12429		0	1.72106e+06	0	5.906e-07		1.15497e-05	2	1585.69	-6.87155	35.9779	0
	High	DYPDFSPSVDAEAIQK	2	1	1	P12429		0	2.00713e+06	0	2.663e-06		0.0795104	2	1781.82	0.48645	40.9612	0
P0DP23	Calmodulin-1 OS=Homo sapiens OX=9606 GN=CALM1 PE=1 SV=1 - [CALM1_HUMAN]	78.988	23.49	1	2	2	4	4.11737e+06	149	16.8268	4.22119	0.00243605
	A3	Sequence	# PSMs	# Proteins	# Protein Groups	Protein Group Accessions	Modifications	ΔCn	Area	q-Value	PEP		Exp Value	Charge	MH+ [Da]	ΔM [ppm]	RT [min]	# Missed Cleavages
	High	aDQLTEEQIAEFK	2	1	1	P0DP23	N-Term(Acetyl)	0	7.10042e+06	0	5.906e-07		0.000535271	2	1563.76	0.900558	46.1199	0
	High	EADIDGDGQVNYEEFVQMMTAK	2	1	1	P0DP23		0	1.13432e+06	0	5.906e-07		0.000543094	2	2490.08	1.00632	57.3231	0
Q15084	Protein disulfide-isomerase A6 OS=Homo sapiens OX=9606 GN=PDIA6 PE=1 SV=1 - [PDIA6_HUMAN]	78.52	7.27	1	2	2	4	2.44365e+06	440	48.0913	5.08447	0.00243605
	A3	Sequence	# PSMs	# Proteins	# Protein Groups	Protein Group Accessions	Modifications	ΔCn	Area	q-Value	PEP		Exp Value	Charge	MH+ [Da]	ΔM [ppm]	RT [min]	# Missed Cleavages
	High	LAAVDATVNQVLASR	2	1	1	Q15084		0	2.67931e+06	0	5.906e-07		0.000858045	2	1527.85	-0.376365	45.9807	0
	High	GSTAPVGGGAFPTIVER	2	1	1	Q15084		0	2.20799e+06	0	5.906e-07		0.0255647	2	1615.85	1.04425	40.163	0
P62263	40S ribosomal protein S14 OS=Homo sapiens OX=9606 GN=RPS14 PE=1 SV=3 - [RS14_HUMAN]	77.97	15.89	1	2	2	4	3.8917e+06	151	16.2625	10.0522	0.00243605
	A3	Sequence	# PSMs	# Proteins	# Protein Groups	Protein Group Accessions	Modifications	ΔCn	Area	q-Value	PEP		Exp Value	Charge	MH+ [Da]	ΔM [ppm]	RT [min]	# Missed Cleavages
	High	IEDVTPIPSDSTR	2	1	1	P62263		0	3.31019e+06	0	5.906e-07		0.000428765	2	1429.72	1.01425	28.0207	0
	High	TPGPGAQSALR	2	1	1	P62263		0	4.4732e+06	0	6.52e-07		0.0174212	2	1054.56	0.204144	19.7519	0
P42704	Leucine-rich PPR motif-containing protein, mitochondrial OS=Homo sapiens OX=9606 GN=LRPPRC PE=1 SV=3 - [LPPRC_HUMAN]	77.7609	1.65	1	2	2	4	1.06024e+06	1394	157.805	6.12549	0.00243605
	A3	Sequence	# PSMs	# Proteins	# Protein Groups	Protein Group Accessions	Modifications	ΔCn	Area	q-Value	PEP		Exp Value	Charge	MH+ [Da]	ΔM [ppm]	RT [min]	# Missed Cleavages
	High	TVLDQQQTPSR	2	1	1	P42704		0	996831	0	6.69e-07		0.000422192	2	1272.65	-1.02117	19.3783	0
	High	VIEEQLEPAVEK	2	1	1	P42704		0	1.12365e+06	0	1.254e-06		0.000492559	2	1383.74	0.146491	29.3021	0
P12814	Alpha-actinin-1 OS=Homo sapiens OX=9606 GN=ACTN1 PE=1 SV=2 - [ACTN1_HUMAN]	77.04	3.48	1	2	2	5	2.20965e+06	892	102.993	5.41455	0.00304507
	A3	Sequence	# PSMs	# Proteins	# Protein Groups	Protein Group Accessions	Modifications	ΔCn	Area	q-Value	PEP		Exp Value	Charge	MH+ [Da]	ΔM [ppm]	RT [min]	# Missed Cleavages
	High	VLAVNQENEQLMEDYEK	2	1	1	P12814		0	693652	0	7.577e-07		0.00243672	2	2051.96	1.15601	40.1883	0
	High	FAIQDISVEETSAK	3	1	1	P12814		0	3.72565e+06	0	1.663e-05		0.0520959	2	1537.78	2.03813	40.7499	0
P30050	60S ribosomal protein L12 OS=Homo sapiens OX=9606 GN=RPL12 PE=1 SV=1 - [RL12_HUMAN]	75.47	18.79	1	2	2	4	1.83861e+06	165	17.8075	9.42236	0.00243605
	A3	Sequence	# PSMs	# Proteins	# Protein Groups	Protein Group Accessions	Modifications	ΔCn	Area	q-Value	PEP		Exp Value	Charge	MH+ [Da]	ΔM [ppm]	RT [min]	# Missed Cleavages
	High	cTGGEVGATSALAPK	2	1	1	P30050	C1(Methylthio)	0	1.84144e+06	0	5.906e-07		0.000510761	2	1407.66	1.43857	27.7959	0
	High	QAQIEVVPSASALIIK	2	1	1	P30050		0	1.83579e+06	0	1.008e-06		0.00302392	2	1666.97	-1.29217	48.4896	0
P13639	Elongation factor 2 OS=Homo sapiens OX=9606 GN=EEF2 PE=1 SV=4 - [EF2_HUMAN]	75	3.96	1	2	2	3	2.11077e+06	858	95.277	6.82959	0.00182704
	A3	Sequence	# PSMs	# Proteins	# Protein Groups	Protein Group Accessions	Modifications	ΔCn	Area	q-Value	PEP		Exp Value	Charge	MH+ [Da]	ΔM [ppm]	RT [min]	# Missed Cleavages
	High	AYLPVNESFGFTADLR	2	1	1	P13639		0	1.58235e+06	0	5.906e-07		1.65659e-06	2	1799.9	-0.238724	53.9989	0
	High	cELLYEGPPDDEAAMGIK	1	1	1	P13639	C1(Methylthio)	0	2.63919e+06	0	5.514e-06		0.333864	2	1996.87	1.76903	50.1721	0
P49411	Elongation factor Tu, mitochondrial OS=Homo sapiens OX=9606 GN=TUFM PE=1 SV=2 - [EFTU_HUMAN]	74.9048	11.73	1	4	4	6	2.69795e+06	452	49.5102	7.60596	0.00365408
	A3	Sequence	# PSMs	# Proteins	# Protein Groups	Protein Group Accessions	Modifications	ΔCn	Area	q-Value	PEP		Exp Value	Charge	MH+ [Da]	ΔM [ppm]	RT [min]	# Missed Cleavages
	High	TIGTGLVTNTLAMTEEEK	2	1	1	P49411		0	3.79363e+06	0	1.594e-06		0.00324875	2	1907.96	-1.6367	48.1598	0
	High	YEEIDNAPEER	1	1	1	P49411		0	1.19196e+06	0	8.966e-06		0.00286335	2	1364.6	-0.922513	22.4244	0
	High	GTVVTGTLER	2	1	1	P49411		0	1.15889e+06	0	0.00123		0.00958342	2	1032.57	0.193512	23.2255	0
	High	LLDAVDTYIPVPAR	1	1	1	P49411		0	3.10825e+06	0	1.388e-06		0.0161256	2	1542.85	1.11898	49.4434	0
P07237	Protein disulfide-isomerase OS=Homo sapiens OX=9606 GN=P4HB PE=1 SV=3 - [PDIA1_HUMAN]	71.59	7.48	1	3	3	4	2.63919e+06	508	57.0807	4.86865	0.00243605
	A3	Sequence	# PSMs	# Proteins	# Protein Groups	Protein Group Accessions	Modifications	ΔCn	Area	q-Value	PEP		Exp Value	Charge	MH+ [Da]	ΔM [ppm]	RT [min]	# Missed Cleavages
	High	VDATEESDLAQQYGVR	2	1	1	P07237		0	3.66723e+06	0	5.906e-07		0.00015071	2	1780.82	-9.51956	35.9487	0
	High	MDSTANEVEAVK	1	1	1	P07237		0	2.21981e+06	0	0.000226		0.0417272	2	1293.6	1.50009	22.2768	0
	High	NFEDVAFDEK	1	1	1	P07237		0	2.03052e+06	0	0.01042		0.0351798	2	1213.54	-0.656551	36.3175	0
P08729	Keratin, type II cytoskeletal 7 OS=Homo sapiens OX=9606 GN=KRT7 PE=1 SV=5 - [K2C7_HUMAN]	71.02	6.82	1	2	3	4	2.92044e+06	469	51.3543	5.47803	-
	A3	Sequence	# PSMs	# Proteins	# Protein Groups	Protein Group Accessions	Modifications	ΔCn	Area	q-Value	PEP		Exp Value	Charge	MH+ [Da]	ΔM [ppm]	RT [min]	# Missed Cleavages
	High	SLDLDGIIAEVK	1	1	1	P08729		0	412773	0	2.051e-06		0.000837731	2	1272.7	-1.5298	54.2665	0
	High	LLEGEESR	2	3	3	P08670;P05787;P08729		0	7.3657e+06	0	0.00115		0.00388396	2	932.469	0.490455	18.4357	0
	High	GQLEALQVDGGR	1	1	1	P08729		0	982844	0	1.468e-06		0.0971436	2	1242.64	-0.0297297	29.9281	0
Q16658	Fascin OS=Homo sapiens OX=9606 GN=FSCN1 PE=1 SV=3 - [FSCN1_HUMAN]	70.5033	16.43	1	5	5	7	2.00728e+06	493	54.4961	7.23975	0.00426309
	A3	Sequence	# PSMs	# Proteins	# Protein Groups	Protein Group Accessions	Modifications	ΔCn	Area	q-Value	PEP		Exp Value	Charge	MH+ [Da]	ΔM [ppm]	RT [min]	# Missed Cleavages
	High	YSVQTADHR	2	1	1	Q16658		0	2.06396e+06	0	7.424e-06		0.000551196	2	1076.51	-1.09754	17.1237	0
	High	QIWTLEQPPDEAGSAAVcLR	2	1	1	Q16658	C18(Methylthio)	0	1.86832e+06	0	5.906e-07		0.0036309	2	2230.06	-0.298064	53.8044	0
	High	SSYDVFQLEFNDGAYNIK	1	1	1	Q16658		0	643106	0	9.183e-06		0.771542	2	2109.98	-0.267123	62.8947	0
	High	NGQLAASVETAGDSELFLMK	1	1	1	Q16658		0	1.1432e+06	0	9.058e-05		1.70991	2	2081.02	-0.371677	51.7287	0
	High	ASAETVDPASLWEY	1	1	1	Q16658		0	2.08956e+06	0.004	0.02571		0.408537	2	1538.7	-0.803711	54.3312	0
P51149	Ras-related protein Rab-7a OS=Homo sapiens OX=9606 GN=RAB7A PE=1 SV=1 - [RAB7A_HUMAN]	70.0667	24.64	1	4	4	7	2.31037e+06	207	23.4748	6.69775	0.00426309
	A3	Sequence	# PSMs	# Proteins	# Protein Groups	Protein Group Accessions	Modifications	ΔCn	Area	q-Value	PEP		Exp Value	Charge	MH+ [Da]	ΔM [ppm]	RT [min]	# Missed Cleavages
	High	LVTMQIWDTAGQER	2	1	1	P51149		0	2.66749e+06	0	5.906e-07		0.00695555	2	1647.82	-0.392085	46.9263	0
	High	TSLMNQYVNK	2	1	1	P51149		0	1.73288e+06	0	1.892e-06		0.0190425	2	1197.59	0.235604	29.9077	0
	High	QETEVELYNEFPEPIK	2	1	1	P51149		0	2.53076e+06	0	0.001708		0.334317	2	1964.95	-1.15041	47.8095	0
	High	NNIPYFETSAK	1	1	1	P51149		0	1.50549e+06	0.004	0.04104		0.0293092	2	1283.63	0.629236	34.942	0
P36578	60S ribosomal protein L4 OS=Homo sapiens OX=9606 GN=RPL4 PE=1 SV=5 - [RL4_HUMAN]	69.8512	9.13	1	3	3	5	2.7033e+06	427	47.6674	11.063	0.00304507
	A3	Sequence	# PSMs	# Proteins	# Protein Groups	Protein Group Accessions	Modifications	ΔCn	Area	q-Value	PEP		Exp Value	Charge	MH+ [Da]	ΔM [ppm]	RT [min]	# Missed Cleavages
	High	AAAAAAALQAK	1	1	1	P36578		0	1.64736e+06	0	5.906e-07		4.68045e-06	2	956.553	0.377056	19.2842	0
	High	IEEVPELPLVVEDK	2	1	1	P36578		0	4.95555e+06	0	1.521e-05		0.0539846	2	1608.87	-1.26172	49.9472	0
	High	GPcIIYNEDNGIIK	2	1	1	P36578	C3(Methylthio)	0	1.50699e+06	0	5.596e-05		0.159553	2	1594.76	0.600615	46.3883	0
P29401	Transketolase OS=Homo sapiens OX=9606 GN=TKT PE=1 SV=3 - [TKT_HUMAN]	69.42	5.94	1	2	2	5	8.12681e+06	623	67.8347	7.66455	0.00304507
	A3	Sequence	# PSMs	# Proteins	# Protein Groups	Protein Group Accessions	Modifications	ΔCn	Area	q-Value	PEP		Exp Value	Charge	MH+ [Da]	ΔM [ppm]	RT [min]	# Missed Cleavages
	High	ILATPPQEDAPSVDIANIR	4	1	1	P29401		0	6.07416e+06	0	5.906e-07		0.000910269	2	2020.07	-1.00688	43.6855	0
	High	SVPTSTVFYPSDGVATEK	1	1	1	P29401		0	1.01795e+07	0	9.342e-06		0.242354	2	1884.92	-1.08306	37.6304	0
Q01650	Large neutral amino acids transporter small subunit 1 OS=Homo sapiens OX=9606 GN=SLC7A5 PE=1 SV=2 - [LAT1_HUMAN]	69.4	6.71	1	2	2	4	4.24563e+06	507	54.9743	7.72314	0.00243605
	A3	Sequence	# PSMs	# Proteins	# Protein Groups	Protein Group Accessions	Modifications	ΔCn	Area	q-Value	PEP		Exp Value	Charge	MH+ [Da]	ΔM [ppm]	RT [min]	# Missed Cleavages
	High	SADGSAPAGEGEGVTLQR	2	1	1	Q01650		0	5.50559e+06	0	5.906e-07		0.00259601	2	1701.81	2.48075	23.7978	0
	High	GDVSNLDPNFSFEGTK	2	1	1	Q01650		0	2.98567e+06	0	3.46e-06		0.0202911	2	1726.79	0.546087	42.1184	0
O43169	Cytochrome b5 type B OS=Homo sapiens OX=9606 GN=CYB5B PE=1 SV=3 - [CYB5B_HUMAN]	67.5248	18	1	2	2	4	6.28784e+06	150	16.6841	4.97021	0.00243605
	A3	Sequence	# PSMs	# Proteins	# Protein Groups	Protein Group Accessions	Modifications	ΔCn	Area	q-Value	PEP		Exp Value	Charge	MH+ [Da]	ΔM [ppm]	RT [min]	# Missed Cleavages
	High	GQEVETSVTYYR	2	1	1	O43169		0	8.86405e+06	0	5.906e-07		0.000145214	2	1431.68	0.863205	28.826	0
	High	sGSmATAEASGSDGK	1	1	1	O43169	N-Term(Acetyl); M4(Oxidation)	0	254983	0.003	0.01789		0.138173	2	1413.57	-4.68424	16.5719	0
	High	sGSMATAEASGSDGK	1	1	1	O43169	N-Term(Acetyl)	0	3.71162e+06	0.003	0.01789		0.236308	2	1397.58	-0.777339	20.6485	0
P09382	Galectin-1 OS=Homo sapiens OX=9606 GN=LGALS1 PE=1 SV=2 - [LEG1_HUMAN]	64.71	19.26	1	2	2	4	3.48818e+06	135	14.7062	5.50342	0.00243605
	A3	Sequence	# PSMs	# Proteins	# Protein Groups	Protein Group Accessions	Modifications	ΔCn	Area	q-Value	PEP		Exp Value	Charge	MH+ [Da]	ΔM [ppm]	RT [min]	# Missed Cleavages
	High	LNLEAINYMAADGDFK	3	1	1	P09382		0	3.48818e+06	0	5.906e-07		0.00102605	2	1784.85	-1.01844	53.0886	0
	High	DGGAWGTEQR	1	1	1	P09382		0	0	0	2.017e-05		0.00687379	2	1076.48	0.011367	21.2207	0
P31949	Protein S100-A11 OS=Homo sapiens OX=9606 GN=S100A11 PE=1 SV=2 - [S10AB_HUMAN]	62.6278	23.81	1	2	2	2	8.02174e+06	105	11.7328	7.12256	0.00121803
	A3	Sequence	# PSMs	# Proteins	# Protein Groups	Protein Group Accessions	Modifications	ΔCn	Area	q-Value	PEP		Exp Value	Charge	MH+ [Da]	ΔM [ppm]	RT [min]	# Missed Cleavages
	High	TEFLSFMNTELAAFTK	1	1	1	P31949		0	915155	0	5.906e-07		9.21457e-05	2	1849.9	-0.423475	67.5911	0
	High	ISSPTETER	1	1	1	P31949		0	1.51283e+07	0.003	0.0203		0.0110512	2	1019.5	-0.665892	17.1167	0
P0C0S5	Histone H2A.Z OS=Homo sapiens OX=9606 GN=H2AZ1 PE=1 SV=2 - [H2AZ_HUMAN]	61.491	12.5	14	2	2	6	5.42947e+06	128	13.5446	10.5796	0.00365408
	A3	Sequence	# PSMs	# Proteins	# Protein Groups	Protein Group Accessions	Modifications	ΔCn	Area	q-Value	PEP		Exp Value	Charge	MH+ [Da]	ΔM [ppm]	RT [min]	# Missed Cleavages
	High	AGLQFPVGR	5	14	1	P0C0S5		0	6.73464e+06	0	0.0002363		0.0180087	2	944.53	-0.887418	36.6024	0
	High	HLQLAIR	1	14	1	P0C0S5		0	4.12431e+06	0.003	0.01789		0.00373636	2	850.526	-0.188085	65.1327	0
Q01105	Protein SET OS=Homo sapiens OX=9606 GN=SET PE=1 SV=3 - [SET_HUMAN]	60.602	12.07	1	3	3	5	3.36296e+06	290	33.4687	4.32275	0.00304507
	A3	Sequence	# PSMs	# Proteins	# Protein Groups	Protein Group Accessions	Modifications	ΔCn	Area	q-Value	PEP		Exp Value	Charge	MH+ [Da]	ΔM [ppm]	RT [min]	# Missed Cleavages
	High	LNEQASEEILK	1	1	1	Q01105		0	4.89026e+06	0	0.007484		0.00399363	2	1273.66	0.0144836	28.9097	0
	High	IDFYFDENPYFENK	2	1	1	Q01105		0	2.67711e+06	0	5.906e-07		0.00848702	2	1840.8	-1.23016	54.0856	0
	High	VEVTEFEDIK	2	1	1	Q01105		0	2.52152e+06	0	0.0004113		0.0560225	2	1208.6	-0.329078	38.3896	0
Q9NR19	Acetyl-coenzyme A synthetase, cytoplasmic OS=Homo sapiens OX=9606 GN=ACSS2 PE=1 SV=1 - [ACSA_HUMAN]	59.66	4.85	1	2	2	4	1.8556e+06	701	78.5291	6.45557	0.00243605
	A3	Sequence	# PSMs	# Proteins	# Protein Groups	Protein Group Accessions	Modifications	ΔCn	Area	q-Value	PEP		Exp Value	Charge	MH+ [Da]	ΔM [ppm]	RT [min]	# Missed Cleavages
	High	AELGMGDSTSQSPPIK	2	1	1	Q9NR19		0	1.38489e+06	0	5.906e-07		0.000209427	2	1617.78	-0.662433	28.8404	0
	High	IGPIATPDYIQNAPGLPK	2	1	1	Q9NR19		0	2.32632e+06	0	0.0003229		0.108628	2	1865.02	-0.806917	46.9768	0
P37802	Transgelin-2 OS=Homo sapiens OX=9606 GN=TAGLN2 PE=1 SV=3 - [TAGL2_HUMAN]	59.2689	19.6	1	3	3	6	1.45298e+06	199	22.3772	8.25049	0.00365408
	A3	Sequence	# PSMs	# Proteins	# Protein Groups	Protein Group Accessions	Modifications	ΔCn	Area	q-Value	PEP		Exp Value	Charge	MH+ [Da]	ΔM [ppm]	RT [min]	# Missed Cleavages
	High	NFSDNQLQEGK	2	1	1	P37802		0	1.65174e+06	0	5.906e-07		0.000256495	2	1279.59	-0.393398	22.6826	0
	High	DDGLFSGDPNWFPK	2	1	1	P37802		0	1.58501e+06	0	9.059e-07		0.0097423	2	1594.72	0.154006	55.1113	0
	High	QMEQISQFLQAAER	2	1	1	P37802		0	1.12219e+06	0	8.253e-05		0.608396	2	1678.82	1.38965	52.472	0
Q07020	60S ribosomal protein L18 OS=Homo sapiens OX=9606 GN=RPL18 PE=1 SV=2 - [RL18_HUMAN]	57.74	13.83	1	2	2	3	1.71961e+06	188	21.6211	11.7222	0.00182704
	A3	Sequence	# PSMs	# Proteins	# Protein Groups	Protein Group Accessions	Modifications	ΔCn	Area	q-Value	PEP		Exp Value	Charge	MH+ [Da]	ΔM [ppm]	RT [min]	# Missed Cleavages
	High	ILTFDQLALDSPK	2	1	1	Q07020		0	2.13437e+06	0	5.906e-07		0.00174588	2	1460.8	0.680044	50.9371	0
	High	TAVVVGTITDDVR	1	1	1	Q07020		0	1.30485e+06	0	3.645e-06		0.0158888	2	1345.73	-0.828248	35.9154	0
O75874	Isocitrate dehydrogenase [NADP] cytoplasmic OS=Homo sapiens OX=9606 GN=IDH1 PE=1 SV=2 - [IDHC_HUMAN]	57.2559	7	1	2	2	3	6.38376e+06	414	46.6295	7.00537	0.00182704
	A3	Sequence	# PSMs	# Proteins	# Protein Groups	Protein Group Accessions	Modifications	ΔCn	Area	q-Value	PEP		Exp Value	Charge	MH+ [Da]	ΔM [ppm]	RT [min]	# Missed Cleavages
	High	TVEAEAAHGTVTR	1	1	1	O75874		0	1.17506e+07	0	7.208e-06		0.0048316	2	1341.67	-1.4203	17.862	0
	High	ISGGSVVEMQGDEMTR	2	1	1	O75874		0	1.01689e+06	0	5.906e-07		0.00407969	2	1695.77	0.0699178	31.575	0
Q96C36	Pyrroline-5-carboxylate reductase 2 OS=Homo sapiens OX=9606 GN=PYCR2 PE=1 SV=1 - [P5CR2_HUMAN]	56.68	8.44	1	2	2	3	1.0392e+06	320	33.6157	7.76709	0.00182704
	A3	Sequence	# PSMs	# Proteins	# Protein Groups	Protein Group Accessions	Modifications	ΔCn	Area	q-Value	PEP		Exp Value	Charge	MH+ [Da]	ΔM [ppm]	RT [min]	# Missed Cleavages
	High	IIASSPEMNLPTVSALR	2	1	1	Q96C36		0	1.23329e+06	0	5.906e-07		0.000198568	2	1798.97	-0.0951878	47.5318	0
	High	ELQSMADQEK	1	1	1	Q96C36		0	845116	0.004	0.03744		0.0316624	2	1178.53	-1.16235	19.5815	0
P09622	Dihydrolipoyl dehydrogenase, mitochondrial OS=Homo sapiens OX=9606 GN=DLD PE=1 SV=2 - [DLDH_HUMAN]	56.6167	5.5	1	2	2	3	1.02806e+06	509	54.143	7.85498	0.00182704
	A3	Sequence	# PSMs	# Proteins	# Protein Groups	Protein Group Accessions	Modifications	ΔCn	Area	q-Value	PEP		Exp Value	Charge	MH+ [Da]	ΔM [ppm]	RT [min]	# Missed Cleavages
	High	NETLGGTcLNVGcIPSK	2	1	1	P09622	C8(Methylthio); C13(Methylthio)	0	1.04255e+06	0	2.862e-06		0.00732526	2	1797.8	-1.87491	51.8214	0
	High	ADGGTQVIDTK	1	1	1	P09622		0	1.01357e+06	0	2.114e-05		0.0192377	2	1104.55	0.283459	18.6231	0
P07910	Heterogeneous nuclear ribonucleoproteins C1/C2 OS=Homo sapiens OX=9606 GN=HNRNPC PE=1 SV=4 - [HNRPC_HUMAN]	55.87	9.15	1	2	2	5	5.35735e+06	306	33.6495	5.08447	0.00304507
	A3	Sequence	# PSMs	# Proteins	# Protein Groups	Protein Group Accessions	Modifications	ΔCn	Area	q-Value	PEP		Exp Value	Charge	MH+ [Da]	ΔM [ppm]	RT [min]	# Missed Cleavages
	High	MIAGQVLDINLAAEPK	3	1	1	P07910		0	5.35735e+06	0	5.906e-07		0.00588009	2	1682.92	2.35032	49.365	0
	High	VFIGNLNTLVVK	2	1	1	P07910		0	0	0	7.093e-07		0.00929421	2	1316.8	1.41899	49.7788	0
P46782	40S ribosomal protein S5 OS=Homo sapiens OX=9606 GN=RPS5 PE=1 SV=4 - [RS5_HUMAN]	52.22	17.16	1	2	2	2	739468	204	22.8621	9.71533	0.00121803
	A3	Sequence	# PSMs	# Proteins	# Protein Groups	Protein Group Accessions	Modifications	ΔCn	Area	q-Value	PEP		Exp Value	Charge	MH+ [Da]	ΔM [ppm]	RT [min]	# Missed Cleavages
	High	WSTDDVQINDISLQDYIAVK	1	1	1	P46782		0	940708	0	5.906e-07		0.00245289	2	2323.15	0.731316	55.8266	0
	High	TIAEcLADELINAAK	1	1	1	P46782	C5(Methylthio)	0	538227	0	5.906e-07		0.0220636	2	1620.8	-0.121934	67.8003	0
P22314	Ubiquitin-like modifier-activating enzyme 1 OS=Homo sapiens OX=9606 GN=UBA1 PE=1 SV=3 - [UBA1_HUMAN]	51.92	4.06	1	3	3	4	1.08874e+06	1058	117.774	5.75732	0.00243605
	A3	Sequence	# PSMs	# Proteins	# Protein Groups	Protein Group Accessions	Modifications	ΔCn	Area	q-Value	PEP		Exp Value	Charge	MH+ [Da]	ΔM [ppm]	RT [min]	# Missed Cleavages
	High	NEEDAAELVALAQAVNAR	2	1	1	P22314		0	1.12086e+06	0	9.224e-07		0.0199471	2	1883.95	0.711195	53.3264	0
	High	LDQPMTEIVSR	1	1	1	P22314		0	495574	0	1.347e-05		0.0236249	2	1288.66	0.498861	33.4967	0
	High	QPAENVNQYLTDPK	1	1	1	P22314		0	1.64979e+06	0.004	0.03884		0.119649	2	1616.79	1.74903	32.6798	0
P21333	Filamin-A OS=Homo sapiens OX=9606 GN=FLNA PE=1 SV=4 - [FLNA_HUMAN]	50.59	3.36	1	5	5	8	1.06002e+06	2647	280.564	6.06201	0.00487211
	A3	Sequence	# PSMs	# Proteins	# Protein Groups	Protein Group Accessions	Modifications	ΔCn	Area	q-Value	PEP		Exp Value	Charge	MH+ [Da]	ΔM [ppm]	RT [min]	# Missed Cleavages
	High	VTAQGPGLEPSGNIANK	2	1	1	P21333		0	1.25087e+06	0	9.782e-07		0.0576311	2	1652.86	1.16097	25.7603	0
	High	SPYTVTVGQAcNPSAcR	1	1	1	P21333	C11(Methylthio); C16(Methylthio)	0	536236	0	6.962e-07		0.0145309	2	1845.78	1.29491	46.2483	0
	High	VANPSGNLTETYVQDR	2	1	1	P21333		0	1.38146e+06	0	7.394e-05		0.111359	2	1763.86	0.664432	31.3156	0
	High	YTPVQQGPVGVNVTYGGDPIPK	1	1	1	P21333		0	547722	0	2.694e-06		0.185834	2	2286.18	-0.533963	41.9359	0
	High	AGQSAAGAAPGGGVDTR	2	1	1	P21333		0	176870	0	1.884e-05		0.211536	2	1442.7	-0.204932	17.8888	0
P28070	Proteasome subunit beta type-4 OS=Homo sapiens OX=9606 GN=PSMB4 PE=1 SV=4 - [PSB4_HUMAN]	50.37	11.36	1	2	2	3	950651	264	29.1855	5.97314	0.00182704
	A3	Sequence	# PSMs	# Proteins	# Protein Groups	Protein Group Accessions	Modifications	ΔCn	Area	q-Value	PEP		Exp Value	Charge	MH+ [Da]	ΔM [ppm]	RT [min]	# Missed Cleavages
	High	VNNSTMLGASGDYADFQYLK	2	1	1	P28070		0	950651	0	5.906e-07		0.000312171	2	2194.01	1.03035	49.5399	0
	High	QPVLSQTEAR	1	1	1	P28070		0	0	0	0.0007931		0.0572563	2	1128.6	0.491456	19.9358	0
P67809	Y-box-binding protein 1 OS=Homo sapiens OX=9606 GN=YBX1 PE=1 SV=3 - [YBOX1_HUMAN]	49.43	10.49	1	2	2	4	1.10664e+06	324	35.9027	9.87646	0.00243605
	A3	Sequence	# PSMs	# Proteins	# Protein Groups	Protein Group Accessions	Modifications	ΔCn	Area	q-Value	PEP		Exp Value	Charge	MH+ [Da]	ΔM [ppm]	RT [min]	# Missed Cleavages
	High	NEGSESAPEGQAQQR	2	1	1	P67809		0	466150	0	5.906e-07		0.00286642	2	1587.7	-0.0333066	15.6331	0
	High	GAEAANVTGPGGVPVQGSK	2	1	1	P67809		0	1.74713e+06	0	1.058e-06		0.0473354	2	1695.87	4.45996	23.7419	0
Q00325	Phosphate carrier protein, mitochondrial OS=Homo sapiens OX=9606 GN=SLC25A3 PE=1 SV=2 - [MPCP_HUMAN]	47.3212	7.73	1	2	2	4	7.31107e+06	362	40.0687	9.37842	0.00243605
	A3	Sequence	# PSMs	# Proteins	# Protein Groups	Protein Group Accessions	Modifications	ΔCn	Area	q-Value	PEP		Exp Value	Charge	MH+ [Da]	ΔM [ppm]	RT [min]	# Missed Cleavages
	High	VLYSNMLGEENTYLWR	2	1	1	Q00325		0	579112	0	5.906e-07		0.000536688	2	1987.96	-0.732708	54.5623	0
	High	IQTQPGYANTLR	2	1	1	Q00325		0	1.4043e+07	0	1.765e-06		0.0286731	2	1361.72	0.433083	26.0976	0
Q9H0U4	Ras-related protein Rab-1B OS=Homo sapiens OX=9606 GN=RAB1B PE=1 SV=1 - [RAB1B_HUMAN]	46.85	22.39	1	3	3	3	931881	201	22.1572	5.73193	0.00182704
	A3	Sequence	# PSMs	# Proteins	# Protein Groups	Protein Group Accessions	Modifications	ΔCn	Area	q-Value	PEP		Exp Value	Charge	MH+ [Da]	ΔM [ppm]	RT [min]	# Missed Cleavages
	High	FADDTYTESYISTIGVDFK	1	1	1	Q9H0U4		0	422049	0	5.906e-07		0.000224486	2	2172	-0.782486	62.4862	0
	High	EFADSLGIPFLETSAK	1	1	1	Q9H0U4		0	1.18622e+06	0.003	0.01789		1.4716	2	1724.87	-0.517537	65.0293	0
	High	mNPEYDYLFK	1	1	1	Q9H0U4	N-Term(Acetyl)	0	1.18737e+06	0.006	0.08316		0.211525	2	1361.61	0.587605	54.8623	0
P04844	Dolichyl-diphosphooligosaccharide--protein glycosyltransferase subunit 2 OS=Homo sapiens OX=9606 GN=RPN2 PE=1 SV=3 - [RPN2_HUMAN]	45.22	5.71	1	2	2	4	1.44127e+06	631	69.241	5.69385	0.00243605
	A3	Sequence	# PSMs	# Proteins	# Protein Groups	Protein Group Accessions	Modifications	ΔCn	Area	q-Value	PEP		Exp Value	Charge	MH+ [Da]	ΔM [ppm]	RT [min]	# Missed Cleavages
	High	FPEEEAPSTVLSQNLFTPK	2	1	1	P04844		0	1.48906e+06	0	5.906e-07		0.000520051	2	2134.07	0.909962	52.4049	0
	High	LQVTNVLSQPLTQATVK	2	1	1	P04844		0	1.39349e+06	0	5.906e-07		0.114066	2	1840.05	-0.0830214	45.6277	0
Q09666	Neuroblast differentiation-associated protein AHNAK OS=Homo sapiens OX=9606 GN=AHNAK PE=1 SV=2 - [AHNK_HUMAN]	44.1554	2.05	1	4	4	6	1.30524e+06	5890	628.699	6.15088	0.00365408
	A3	Sequence	# PSMs	# Proteins	# Protein Groups	Protein Group Accessions	Modifications	ΔCn	Area	q-Value	PEP		Exp Value	Charge	MH+ [Da]	ΔM [ppm]	RT [min]	# Missed Cleavages
	High	ADIDVSGPK	2	1	1	Q09666		0	1.44746e+06	0	4.528e-05		0.0114195	2	901.461	-1.64636	20.7409	0
	High	LPSGSGAASPTGSAVDIR	2	1	1	Q09666		0	1.5756e+06	0	5.906e-07		0.0423772	2	1642.84	-0.108491	28.3424	0
	High	DDGVFVQEVTQNSPAAR	1	1	1	Q09666		0	892668	0	5.906e-07		0.0655179	2	1832.87	-1.96108	39.3753	0
	High	VDIEGPDVNIEGPEGK	1	1	1	Q09666		0	694034	0	1.509e-05		0.344879	2	1667.81	-1.79729	36.9168	0
P04040	Catalase OS=Homo sapiens OX=9606 GN=CAT PE=1 SV=3 - [CATA_HUMAN]	44.15	5.69	1	2	2	3	2.58002e+06	527	59.7188	7.38623	0.00182704
	A3	Sequence	# PSMs	# Proteins	# Protein Groups	Protein Group Accessions	Modifications	ΔCn	Area	q-Value	PEP		Exp Value	Charge	MH+ [Da]	ΔM [ppm]	RT [min]	# Missed Cleavages
	High	ADVLTTGAGNPVGDK	1	1	1	P04040		0	1.12966e+06	0	5.906e-07		0.00781275	2	1414.72	1.72675	26.393	0
	High	FSTVAGESGSADTVR	2	1	1	P04040		0	4.03037e+06	0	6.536e-07		0.0235196	2	1483.7	1.42486	23.8913	0
P18206	Vinculin OS=Homo sapiens OX=9606 GN=VCL PE=1 SV=4 - [VINC_HUMAN]	44.0077	3.44	1	3	3	5	1.39773e+06	1134	123.722	5.65576	0.00304507
	A3	Sequence	# PSMs	# Proteins	# Protein Groups	Protein Group Accessions	Modifications	ΔCn	Area	q-Value	PEP		Exp Value	Charge	MH+ [Da]	ΔM [ppm]	RT [min]	# Missed Cleavages
	High	DPSASPGDAGEQAIR	2	1	1	P18206		0	1.44144e+06	0	1.144e-06		0.00162717	2	1470.68	1.52337	21.6694	0
	High	ETVQTTEDQILK	1	1	1	P18206		0	1.35403e+06	0	0.0002638		0.877583	2	1404.72	1.13396	30.2949	0
	High	QVATALQNLQTK	2	1	1	P18206		0	0	0.005	0.05986		0.275298	2	1314.74	0.522955	29.6372	0
P78371	T-complex protein 1 subunit beta OS=Homo sapiens OX=9606 GN=CCT2 PE=1 SV=4 - [TCPB_HUMAN]	43.8233	4.49	1	2	2	3	810821	535	57.4521	6.45557	0.00182704
	A3	Sequence	# PSMs	# Proteins	# Protein Groups	Protein Group Accessions	Modifications	ΔCn	Area	q-Value	PEP		Exp Value	Charge	MH+ [Da]	ΔM [ppm]	RT [min]	# Missed Cleavages
	High	aSLSLAPVNIFK	2	1	1	P78371	N-Term(Acetyl)	0	778582	0	5.916e-07		0.00272475	2	1301.74	-1.43797	58.7003	0
	High	ILIANTGMDTDK	1	1	1	P78371		0	843059	0	6.514e-06		0.180788	2	1291.66	-0.380893	29.9928	0
Q00839	Heterogeneous nuclear ribonucleoprotein U OS=Homo sapiens OX=9606 GN=HNRNPU PE=1 SV=6 - [HNRPU_HUMAN]	43.81	6.06	1	4	4	6	1.91889e+06	825	90.528	5.99854	0.00365408
	A3	Sequence	# PSMs	# Proteins	# Protein Groups	Protein Group Accessions	Modifications	ΔCn	Area	q-Value	PEP		Exp Value	Charge	MH+ [Da]	ΔM [ppm]	RT [min]	# Missed Cleavages
	High	AEGGGGGGRPGAPAAGDGK	3	1	1	Q00839		0	479652	0	5.906e-07		0.00869607	2	1538.73	-0.536353	14.7239	0
	High	SSGPTSLFAVTVAPPGAR	1	1	1	Q00839		0	3.13477e+06	0	1.354e-05		0.200829	2	1714.91	-1.03868	47.7376	0
	High	TcNcETEDYGEK	1	1	1	Q00839	C2(Methylthio); C4(Methylthio)	0	2.14226e+06	0	0.003645		0.0216755	2	1483.48	-1.01487	30.3659	0
	High	KAEGGGGGGRPGAPAAGDGK	1	1	1	Q00839		0	121471	0.003	0.01845		0.0885763	3	1666.83	1.5478	13.9409	1
P22626	Heterogeneous nuclear ribonucleoproteins A2/B1 OS=Homo sapiens OX=9606 GN=HNRNPA2B1 PE=1 SV=2 - [ROA2_HUMAN]	42.92	17.85	1	4	4	5	4.54603e+06	353	37.4067	8.95361	0.00304507
	A3	Sequence	# PSMs	# Proteins	# Protein Groups	Protein Group Accessions	Modifications	ΔCn	Area	q-Value	PEP		Exp Value	Charge	MH+ [Da]	ΔM [ppm]	RT [min]	# Missed Cleavages
	High	QEMQEVQSSR	1	1	1	P22626		0	6.27278e+06	0	0.009417		0.00347827	2	1221.55	-0.680895	17.1884	0
	High	EESGKPGAHVTVK	2	1	1	P22626		0	628246	0	0.008143		0.0480033	2	1338.7	0.143657	15.0308	0
	High	NMGGPYGGGNYGPGGSGGSGGYGGR	1	1	1	P22626		0	713418	0	6.393e-07		0.202541	2	2189.91	1.60822	29.7173	0
	High	GGGGNFGPGPGSNFR	1	1	1	P22626		0	6.65188e+06	0.003	0.01789		0.191419	2	1377.63	-0.323295	28.9053	0
P27708	CAD protein OS=Homo sapiens OX=9606 GN=CAD PE=1 SV=3 - [PYR1_HUMAN]	42.6797	1.12	1	2	2	3	471710	2225	242.829	6.45557	0.00182704
	A3	Sequence	# PSMs	# Proteins	# Protein Groups	Protein Group Accessions	Modifications	ΔCn	Area	q-Value	PEP		Exp Value	Charge	MH+ [Da]	ΔM [ppm]	RT [min]	# Missed Cleavages
	High	aALVLEDGSVLR	2	1	1	P27708	N-Term(Acetyl)	0	560807	0	6.643e-05		0.00104011	2	1284.72	0.951427	55.1412	0
	High	EATAGNPGGQTVR	1	1	1	P27708		0	382614	0.004	0.02311		0.346737	2	1257.62	0.146707	16.3375	0
P04264	Keratin, type II cytoskeletal 1 OS=Homo sapiens OX=9606 GN=KRT1 PE=1 SV=6 - [K2C1_HUMAN]	42.27	3.73	1	2	2	3	2.82606e+06	644	65.999	8.11865	-
	A3	Sequence	# PSMs	# Proteins	# Protein Groups	Protein Group Accessions	Modifications	ΔCn	Area	q-Value	PEP		Exp Value	Charge	MH+ [Da]	ΔM [ppm]	RT [min]	# Missed Cleavages
	High	FLEQQNQVLQTK	2	1	1	P04264		0	4.5682e+06	0	5.906e-07		0.00106621	2	1475.78	-1.40304	29.5311	0
	High	SLNNQFASFIDK	1	1	1	P04264		0	1.08392e+06	0.001	0.01789		0.161316	2	1383.69	-1.23949	47.0023	0
P20020	Plasma membrane calcium-transporting ATPase 1 OS=Homo sapiens OX=9606 GN=ATP2B1 PE=1 SV=4 - [AT2B1_HUMAN]	42.1786	2.7	1	2	2	2	744336	1220	134.6	5.90967	0.00121803
	A3	Sequence	# PSMs	# Proteins	# Protein Groups	Protein Group Accessions	Modifications	ΔCn	Area	q-Value	PEP		Exp Value	Charge	MH+ [Da]	ΔM [ppm]	RT [min]	# Missed Cleavages
	High	TSPNEGLSGNPADLER	1	1	1	P20020		0	689184	0	5.906e-07		0.000509627	2	1656.78	0.482516	29.0792	0
	High	EASDIILTDDNFTSIVK	1	1	1	P20020		0	799488	0	1.552e-05		0.288413	2	1880.95	-0.94751	51.5015	0
O95573	Long-chain-fatty-acid--CoA ligase 3 OS=Homo sapiens OX=9606 GN=ACSL3 PE=1 SV=3 - [ACSL3_HUMAN]	42.17	4.44	1	2	2	3	1.23156e+06	720	80.3683	8.38232	0.00182704
	A3	Sequence	# PSMs	# Proteins	# Protein Groups	Protein Group Accessions	Modifications	ΔCn	Area	q-Value	PEP		Exp Value	Charge	MH+ [Da]	ΔM [ppm]	RT [min]	# Missed Cleavages
	High	LSPEPWTPETGLVTDAFK	2	1	1	O95573		0	1.80074e+06	0	5.906e-07		0.000476568	2	1988	0.14142	54.8778	0
	High	EVLNEEDEVQPNGK	1	1	1	O95573		0	662391	0	2.591e-06		0.253737	2	1599.75	-2.25658	23.4503	0
P16615	Sarcoplasmic/endoplasmic reticulum calcium ATPase 2 OS=Homo sapiens OX=9606 GN=ATP2A2 PE=1 SV=1 - [AT2A2_HUMAN]	40.9367	3.93	1	3	3	5	2.36138e+06	1042	114.683	5.33838	0.00304507
	A3	Sequence	# PSMs	# Proteins	# Protein Groups	Protein Group Accessions	Modifications	ΔCn	Area	q-Value	PEP		Exp Value	Charge	MH+ [Da]	ΔM [ppm]	RT [min]	# Missed Cleavages
	High	DIVPGDIVEIAVGDK	2	1	1	P16615		0	1.52117e+06	0	5.906e-07		0.00708227	2	1539.83	0.332937	55.0672	0
	High	EFDELNPSAQR	2	1	1	P16615		0	3.14321e+06	0	9.726e-05		0.0741053	2	1305.61	0.803093	29.0619	0
	High	VGEATETALTcLVEK	1	1	1	P16615	C11(Methylthio)	0	2.41975e+06	0	1.624e-05		0.136593	2	1609.78	1.62057	49.7917	0
O14818	Proteasome subunit alpha type-7 OS=Homo sapiens OX=9606 GN=PSMA7 PE=1 SV=1 - [PSA7_HUMAN]	40.6333	11.69	1	2	2	4	1.43584e+06	248	27.8696	8.45557	0.00243605
	A3	Sequence	# PSMs	# Proteins	# Protein Groups	Protein Group Accessions	Modifications	ΔCn	Area	q-Value	PEP		Exp Value	Charge	MH+ [Da]	ΔM [ppm]	RT [min]	# Missed Cleavages
	High	LTVEDPVTVEYITR	2	1	1	O14818		0	1.8929e+06	0	5.906e-07		0.0129956	2	1634.86	0.331551	45.3847	0
	High	NYTDEAIETDDLTIK	2	1	1	O14818		0	978781	0	9.683e-07		0.0513289	2	1740.82	0.111012	39.4209	0
Q9NS69	Mitochondrial import receptor subunit TOM22 homolog OS=Homo sapiens OX=9606 GN=TOMM22 PE=1 SV=3 - [TOM22_HUMAN]	40.4	40.85	1	3	3	3	1.64119e+06	142	15.5118	4.33545	0.00182704
	A3	Sequence	# PSMs	# Proteins	# Protein Groups	Protein Group Accessions	Modifications	ΔCn	Area	q-Value	PEP		Exp Value	Charge	MH+ [Da]	ΔM [ppm]	RT [min]	# Missed Cleavages
	High	LQmEQQQQLQQR	1	1	1	Q9NS69	M3(Oxidation)	0	288617	0	8.508e-07		0.00826554	2	1573.78	0.321561	18.4061	0
	High	aAAVAAAGAGEPQSPDELLPK	1	1	1	Q9NS69	N-Term(Acetyl)	0	2.42532e+06	0	5.906e-07		0.102059	2	2005.02	-2.03758	46.8678	0
	High	GDAEKPEEELEEDDDEELDETLSER	1	1	1	Q9NS69		0	2.20962e+06	0	2.913e-06		0.315849	3	2921.22	-0.324237	41.3337	0
P84098	60S ribosomal protein L19 OS=Homo sapiens OX=9606 GN=RPL19 PE=1 SV=1 - [RL19_HUMAN]	39.8121	13.27	1	2	2	4	2.53175e+06	196	23.4512	11.4731	0.00243605
	A3	Sequence	# PSMs	# Proteins	# Protein Groups	Protein Group Accessions	Modifications	ΔCn	Area	q-Value	PEP		Exp Value	Charge	MH+ [Da]	ΔM [ppm]	RT [min]	# Missed Cleavages
	High	LLADQAEAR	2	1	1	P84098		0	2.93885e+06	0	2.003e-05		0.00470065	2	986.527	0.192288	19.4809	0
	High	VWLDPNETNEIANANSR	2	1	1	P84098		0	2.12464e+06	0	6.766e-06		0.0303047	2	1942.92	-0.863465	39.5143	0
P13796	Plastin-2 OS=Homo sapiens OX=9606 GN=LCP1 PE=1 SV=6 - [PLSL_HUMAN]	39.13	6.22	1	3	3	4	2.54619e+06	627	70.2439	5.42725	0.00243605
	A3	Sequence	# PSMs	# Proteins	# Protein Groups	Protein Group Accessions	Modifications	ΔCn	Area	q-Value	PEP		Exp Value	Charge	MH+ [Da]	ΔM [ppm]	RT [min]	# Missed Cleavages
	High	MINLSVPDTIDER	2	1	1	P13796		0	2.14205e+06	0	0.002848		0.0235766	2	1502.75	-1.30008	44.3422	0
	High	GDEEGVPAVVIDMSGLR	1	1	1	P13796		0	4.51062e+06	0	0.0006008		0.400101	2	1743.86	-1.24127	53.8767	0
	High	ALENDPDcR	1	1	1	P13796	C8(Methylthio)	0	985903	0.007	0.1029		0.0282513	2	1078.43	-0.467128	22.5563	0
P17174	Aspartate aminotransferase, cytoplasmic OS=Homo sapiens OX=9606 GN=GOT1 PE=1 SV=3 - [AATC_HUMAN]	38.33	9.44	1	2	2	2	444701	413	46.2185	7.00537	0.00121803
	A3	Sequence	# PSMs	# Proteins	# Protein Groups	Protein Group Accessions	Modifications	ΔCn	Area	q-Value	PEP		Exp Value	Charge	MH+ [Da]	ΔM [ppm]	RT [min]	# Missed Cleavages
	High	APPSVFAEVPQAQPVLVFK	1	1	1	P17174		0	528785	0	5.906e-07		0.00166657	2	2024.12	1.20533	55.1222	0
	High	IVASTLSNPELFEEWTGNVK	1	1	1	P17174		0	360617	0.003	0.01789		0.586556	2	2234.13	-0.637984	55.7681	0
P15311	Ezrin OS=Homo sapiens OX=9606 GN=EZR PE=1 SV=4 - [EZRI_HUMAN]	38.2	3.58	1	2	2	2	483656	586	69.3697	6.26514	0.00121803
[truncated: 82 more rows]
